# Supplementary material for: Palladium catalyzed regioselective B–C(sp) coupling via direct cage B–H activation: synthesis of B(4)-alkynylated o-carboranes
Source: PubMed Central journal article supplement (PMC6024241; doi:10.1039/c6sc00901h), 2016-05-13

# Electronic Supplementary Information

## Palladium Catalyzed Regioselective B-C(sp) Coupling via Direct Cage B-H Activation: Synthesis of B(4)-Alkynylated *o*-Carboranes

Yangjian Quan, Cen Tang, and Zuowei Xie\*

*Department of Chemistry and State Key Laboratory of Synthetic Chemistry, The Chinese  
University of Hong Kong, Shatin, New Territories, Hong Kong, China*

E-mail: [zxie@cuhk.edu.hk](mailto:zxie@cuhk.edu.hk)

### Table of Contents

|                                                            |     |
|------------------------------------------------------------|-----|
| General Procedures                                         | S2  |
| Experimental Section                                       | S2  |
| Control Experiments                                        | S12 |
| Transformations of <b>3a</b>                               | S15 |
| Crystal Data and Summary of Data Collection and Refinement | S19 |
| References                                                 | S20 |
| NMR Spectra                                                | S21 |

**General Procedures.** All reactions were carried out under an atmosphere of dry argon with the rigid exclusion of air and moisture using standard Schlenk techniques or in a glovebox unless otherwise specified.  $^1\text{H}$ ,  $^{13}\text{C}$  and  $^{11}\text{B}$  NMR spectra were recorded on a Bruker DPX 400 spectrometer at 400 MHz, 100 MHz and 128 MHz, respectively. All chemical shifts were reported in  $\delta$  units with references to the residual solvent resonances of the deuterated solvents for proton and carbon chemical shifts, and to external  $\text{BF}_3\cdot\text{OEt}_2$  (0.00 ppm) for boron chemical shifts. The data were reported as follows: chemical shift, multiplicity (s = singlet, d = doublet, t = triplet, q = quadruplet, m = multiplet or unresolved, br = broad), coupling constant(s) in Hz, integration, and assignment. Mass spectra were obtained on a Thermo Finnigan MAT 95 XL spectrometer. Compounds **1a-e**,<sup>1</sup> **2**,<sup>2</sup> and 1-Ar-*o*-carborane<sup>3</sup> were prepared according to literature methods. All organic solvents were freshly distilled from Na-K alloy or  $\text{CaH}_2$  immediately prior to use. All other chemicals were purchased from either Aldrich or Acros Chemical Co. and used as received unless otherwise specified.

**Preparation of *o*-Carboranyl Monocarboxylic Acid (1). A Representative Procedure.** A diethyl ether solution (20 mL) of 1-R-*o*-carborane (5.0 mmol) was cooled to  $-78\text{ }^\circ\text{C}$ , to which was slowly added  $n\text{BuLi}$  (5.0 mmol, 1.6 M in hexane, 3.2 mL). The resulting solution was stirred for 1 h at  $-78\text{ }^\circ\text{C}$ . Dry ice (775 mg, 34.1 mmol) was crushed into small pieces and added immediately to the reaction mixture, which was stirred for an additional 1 h and then warmed to room temperature. After removal of ether and addition of water (10 mL), the resultant solution was extracted with hexane (10 x 2 mL) to recover the unreacted 1-R-*o*-carborane. The aqueous layer was acidified with 3 M HCl. Then the resultant solution

was extracted with hexane (10 x 3 mL). The hexane solutions were combined and dried with anhydrous Na<sub>2</sub>SO<sub>4</sub>. Removal of hexane gave **1** as a white crystalline solid.

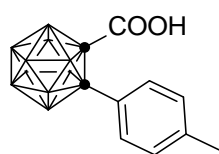

**1f**: Yield 90%. White solid. <sup>1</sup>H NMR (400 MHz, CD<sub>2</sub>Cl<sub>2</sub>): δ 8.50 (s, 1H) (COOH), 7.53 (d, *J* = 8.4 Hz, 2H), 7.16 (d, *J* = 8.4 Hz, 2H) (Ar), 2.35 (s, 3H) (CH<sub>3</sub>). <sup>13</sup>C{<sup>1</sup>H} NMR (100 MHz, CD<sub>2</sub>Cl<sub>2</sub>): δ 159.9 (COOH), 142.0, 131.1, 129.7, 128.1 (Ar), 84.7, 76.1 (cage C), 21.2 (CH<sub>3</sub>). <sup>11</sup>B{<sup>1</sup>H} NMR (128 MHz, CD<sub>2</sub>Cl<sub>2</sub>): δ 0.8 (1B), -2.3 (1B), -8.5 (8B). Anal. Calcd for C<sub>10</sub>H<sub>18</sub>B<sub>10</sub>O<sub>2</sub>: C, 43.15; H, 6.52. Found: C, 43.07; H, 6.73.

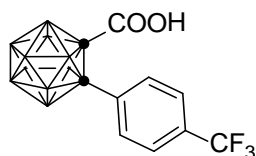

**1h**: Yield 85%. White solid. <sup>1</sup>H NMR (400 MHz, CD<sub>2</sub>Cl<sub>2</sub>): δ 7.92 (s, 1H) (COOH), 7.82 (d, *J* = 8.4 Hz, 2H), 7.64 (d, *J* = 8.4 Hz, 2H) (Ar). <sup>13</sup>C{<sup>1</sup>H} NMR (100 MHz, CD<sub>2</sub>Cl<sub>2</sub>): δ 159.5 (COOH), 134.7, 132.9 (q, <sup>2</sup>*J*<sub>C-F</sub> = 34 Hz), 131.9, 126.0 (q, <sup>3</sup>*J*<sub>C-F</sub> = 4 Hz) (Ar), 123.9 (q, <sup>1</sup>*J*<sub>C-F</sub> = 270 Hz) (CF<sub>3</sub>), 82.2, 75.9 (cage C). <sup>11</sup>B{<sup>1</sup>H} NMR (128 MHz, CD<sub>2</sub>Cl<sub>2</sub>): δ 0.9 (1B), -1.7 (1B), -8.1 (4B), -9.1 (2B), -9.9 (2B). Anal. Calcd for C<sub>10</sub>H<sub>15</sub>B<sub>10</sub>O<sub>2</sub>F<sub>3</sub>: C, 36.14; H, 4.55. Found: C, 35.76; H, 4.86.

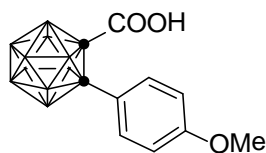

**1j**: Yield 88%. White solid. <sup>1</sup>H NMR (400 MHz, CD<sub>2</sub>Cl<sub>2</sub>): δ 8.23 (s, 1H) (COOH), 7.58 (d, *J* = 8.8 Hz, 2H), 6.84 (d, *J* = 8.8 Hz, 2H) (Ar), 3.81 (s, 3H) (OCH<sub>3</sub>). <sup>13</sup>C{<sup>1</sup>H} NMR (100 MHz, CD<sub>2</sub>Cl<sub>2</sub>): δ 162.0 (COOH), 160.1, 132.8, 123.0, 114.2 (Ar), 85.0, 76.3 (cage C), 55.9 (OCH<sub>3</sub>). <sup>11</sup>B{<sup>1</sup>H} NMR (128 MHz, CD<sub>2</sub>Cl<sub>2</sub>): δ 0.8 (1B), -2.7 (1B), -8.6 (8B). Anal. Calcd for C<sub>10</sub>H<sub>19</sub>B<sub>10</sub>O<sub>3.5</sub> (**1j** + 0.5 H<sub>2</sub>O): C, 39.59; H, 6.31. Found: C, 39.33; H, 6.51.

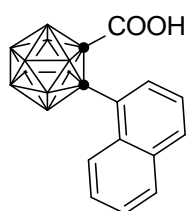

**1k**: Yield 80%. White solid. <sup>1</sup>H NMR (400 MHz, CD<sub>2</sub>Cl<sub>2</sub>): δ 8.96 (d, *J* = 8.4 Hz, 1H), 8.19 (d, *J* = 7.2 Hz, 1H), 7.97 (d, *J* = 7.6 Hz, 1H), 7.92 (d, *J* = 7.6

Hz, 1H), 7.64 (t,  $J = 8.0$  Hz, 1H), 7.55 (t,  $J = 7.2$  Hz, 1H), 7.42 (t,  $J = 7.2$  Hz, 1H) (Ar), 6.25 (s, 1H) (COOH).  $^{13}\text{C}\{^1\text{H}\}$  NMR (100 MHz,  $\text{CD}_2\text{Cl}_2$ ):  $\delta$  160.2 (COOH), 135.2, 134.6, 133.7, 131.7, 130.1, 127.6, 126.5, 125.9, 125.2, 124.8 (Ar), 86.5, 77.8 (cage C).  $^{11}\text{B}\{^1\text{H}\}$  NMR (128 MHz,  $\text{CD}_2\text{Cl}_2$ ) :  $\delta$  0.3 (1B), -0.8 (1B), -8.0 (5B), -8.9 (3B). Anal. Calcd for  $\text{C}_{13}\text{H}_{18}\text{B}_{10}\text{O}_2$ : C, 49.66; H, 5.77. Found: C, 49.55; H, 5.87.

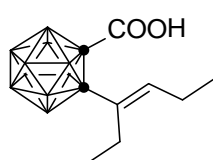

**1m:** Yield 88%. White solid.  $^1\text{H}$  NMR (400 MHz,  $\text{CD}_2\text{Cl}_2$ ):  $\delta$  9.24 (s, 1H) (COOH), 6.09 (t,  $J = 7.2$  Hz, 1H) (olefinic), 2.26 (q,  $J = 7.6$  Hz, 2H), 2.11 (m, 2H) ( $\text{CH}_2$ ), 0.98 (m, 6H) ( $\text{CH}_3$ ).  $^{13}\text{C}\{^1\text{H}\}$  NMR (100 MHz,  $\text{CD}_2\text{Cl}_2$ ):  $\delta$

161.7 (COOH), 143.1, 132.1 (olefinic), 87.7, 76.4 (cage C), 25.6, 22.8 ( $\text{CH}_2$ ), 14.1, 13.5 ( $\text{CH}_3$ ).  $^{11}\text{B}\{^1\text{H}\}$  NMR (128 MHz,  $\text{CD}_2\text{Cl}_2$ ) :  $\delta$  -0.0 (1B), -2.9 (1B), -8.7 (4B), -9.9 (4B). Anal. Calcd for  $\text{C}_9\text{H}_{22}\text{B}_{10}\text{O}_2$ : C, 39.98; H, 8.20. Found: C, 40.13; H, 8.14.

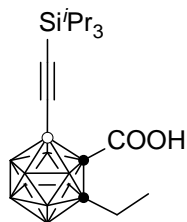

**3b-COOH:** Yield 78%. White solid.  $^1\text{H}$  NMR (400 MHz,  $\text{CD}_2\text{Cl}_2$ ):  $\delta$  10.09 (s, 1H) (COOH), 2.42 (q,  $J = 7.6$  Hz, 2H), 1.15 (t,  $J = 7.6$  Hz, 3H) (Et), 1.05 (m, 21H) ( $i\text{Pr}_3\text{Si}$ ).  $^{13}\text{C}\{^1\text{H}\}$  NMR (100 MHz,  $\text{CD}_2\text{Cl}_2$ ):  $\delta$  161.4 (COOH), 82.9, 74.7 (cage C), 30.5 ( $\text{CH}_2$ ), 18.7 ( $i\text{Pr}_3\text{Si}$ ), 14.2 ( $\text{CH}_3$ ), 11.5 ( $i\text{Pr}_3\text{Si}$ ) (alkynyl

carbons were not observed).  $^{11}\text{B}\{^1\text{H}\}$  NMR (128 MHz,  $\text{CD}_2\text{Cl}_2$ ) :  $\delta$  -0.4 (1B), -2.9 (1B), -9.3 (8B). Anal. Calcd for  $\text{C}_{16}\text{H}_{36}\text{B}_{10}\text{O}_2\text{Si}$ : C, 48.45; H, 9.15. Found: C, 48.32; H, 9.21.

### Preparation of B(4)-Alkynylated *o*-Carboranes (3). Representative Procedure (A).

1-COOH-2- $\text{R}^1$ -*o*-carborane **1** (0.20 mmol),  $\text{R}^2\text{-}\equiv\text{-Br}$  **2** (0.20 mmol),  $\text{Pd}(\text{OAc})_2$  (0.01 mmol), and  $\text{AgOAc}$  (0.60 mmol) were mixed in DCE (5 mL). The resulting mixture was heated in a closed flask at 90 °C for 6 h. After hydrolysis with water (10 mL) and extraction with diethyl ether (10 mL x 3), the ether solutions were combined and concentrated to dryness in vacuo.

The residue was subjected to flash column chromatography on silica gel (230-400 mesh) using *n*-hexane as eluent to give the product **3**.

**Representative Procedure (B).** A toluene suspension (5 mL) of 1-COOH-2-R<sup>1</sup>-*o*-carborane **1** (0.20 mmol), K<sub>2</sub>HPO<sub>4</sub> (0.40 mmol), Pd(OAc)<sub>2</sub> (0.01 mmol) and AgOAc (0.60 mmol) was heated at 80 °C, to which was slowly added a toluene solution (5 mL) of R<sup>2</sup>-≡-H **2** (0.40 mmol) by a syringe pump over a period of 10 h. After hydrolysis with water (10 mL) and extraction with diethyl ether (10 mL x 3), the ether solutions were combined and concentrated to dryness in vacuo. The residue was subjected to flash column chromatography on silica gel (230-400 mesh) using *n*-hexane as eluent to give the product **3**.

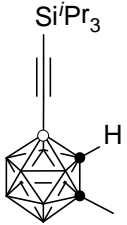 **3a:** Yield 81% (A), 79% (B). Colorless oil. <sup>1</sup>H NMR (400 MHz, CDCl<sub>3</sub>): δ 3.76 (s, 1H) (cage *H*), 2.05 (s, 3H) (CH<sub>3</sub>), 1.06 (m, 21H) (<sup>*i*</sup>Pr<sub>3</sub>Si). <sup>13</sup>C{<sup>1</sup>H} NMR (100 MHz, CDCl<sub>3</sub>): δ 70.2, 63.0 (cage *C*), 26.0 (CH<sub>3</sub>), 18.7, 11.3 (<sup>*i*</sup>Pr<sub>3</sub>Si) (alkynyl carbons were not observed). <sup>11</sup>B{<sup>1</sup>H} NMR (128 MHz, CDCl<sub>3</sub>): δ -2.7 (1B), -6.4 (1B), -9.0 (1B), -10.1 (1B), -11.7 (5B), -13.2 (1B). HRMS: *m/z* calcd for C<sub>14</sub>H<sub>34</sub>B<sub>10</sub>Si [M]<sup>+</sup>: 338.3436. Found: 338.3437.

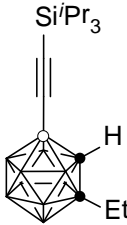 **3b:** Yield 76% (A). Colorless oil. <sup>1</sup>H NMR (400 MHz, CDCl<sub>3</sub>): δ 3.74 (s, 1H) (cage *H*), 2.30 (q, *J* = 7.6 Hz, 2H) (CH<sub>2</sub>), 1.10 (t, *J* = 7.6 Hz, 3H) (CH<sub>3</sub>), 1.06 (m, 21H) (<sup>*i*</sup>Pr<sub>3</sub>Si). <sup>13</sup>C{<sup>1</sup>H} NMR (100 MHz, CDCl<sub>3</sub>): δ 76.1, 62.4 (cage *C*), 31.8 (CH<sub>2</sub>), 18.7 (<sup>*i*</sup>Pr<sub>3</sub>Si), 13.7 (CH<sub>3</sub>), 11.3 (<sup>*i*</sup>Pr<sub>3</sub>Si) (alkynyl carbons were not observed). <sup>11</sup>B{<sup>1</sup>H} NMR (128 MHz, CDCl<sub>3</sub>): δ -3.0 (1B), -5.3 (1B), -8.9 (1B), -10.1 (1B), -12.1 (5B), -14.0 (1B). HRMS: *m/z* calcd for C<sub>15</sub>H<sub>36</sub>B<sub>10</sub>Si [M]<sup>+</sup>: 352.3593. Found: 352.3592.

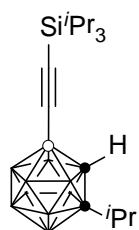

**3c:** Yield 75% (A), 86% (B). Colorless oil.  $^1\text{H}$  NMR (400 MHz,  $\text{CD}_2\text{Cl}_2$ ):  $\delta$  3.90 (s, 1H) (cage *H*), 2.52 (m, 1H) ( $^i\text{Pr}$ ), 1.14 (d,  $J = 6.8$  Hz, 6H), 1.08 (m, 21H) ( $^i\text{Pr}_3\text{Si}$ ).  $^{13}\text{C}\{^1\text{H}\}$  NMR (100 MHz,  $\text{CD}_2\text{Cl}_2$ ):  $\delta$  82.0, 62.4 (cage *C*), 35.3, 23.1 ( $^i\text{Pr}$ ), 18.8, 11.6 ( $^i\text{Pr}_3\text{Si}$ ) (alkynyl carbons were not observed).  $^{11}\text{B}\{^1\text{H}\}$  NMR (128 MHz,  $\text{CD}_2\text{Cl}_2$ ):  $\delta$  -4.1 (1B), -5.1 (1B), -9.3 (1B), -10.4 (1B), -12.6 (4B), -14.0 (2B). HRMS:  $m/z$  calcd for  $\text{C}_{16}\text{H}_{38}\text{B}_{10}\text{Si}$  [ $\text{M}$ ] $^+$ : 366.3750. Found: 366.3750.

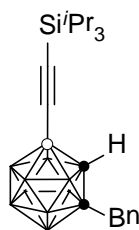

**3d:** Yield 73% (A), 70% (B). Colorless oil.  $^1\text{H}$  NMR (400 MHz,  $\text{CD}_2\text{Cl}_2$ ):  $\delta$  7.37 (m, 3H), 7.17 (m, 2H) (Ar), 3.54 (s, 3H) ( $\text{CH}_2$  & cage *H*), 1.05 (m, 21H) ( $^i\text{Pr}_3\text{Si}$ ).  $^{13}\text{C}\{^1\text{H}\}$  NMR (100 MHz,  $\text{CD}_2\text{Cl}_2$ ):  $\delta$  134.9, 130.2, 129.4, 128.9 (Ar), 75.3, 62.0 (cage *C*), 43.9 ( $\text{CH}_2$ ), 18.7, 11.6 ( $^i\text{Pr}_3\text{Si}$ ) (alkynyl carbons were not observed).  $^{11}\text{B}\{^1\text{H}\}$  NMR (128 MHz,  $\text{CD}_2\text{Cl}_2$ ):  $\delta$  -3.6 (1B), -5.7 (1B), -9.2 (1B), -10.2 (1B), -12.3 (3B), -13.1 (3B). HRMS:  $m/z$  calcd for  $\text{C}_{20}\text{H}_{38}\text{B}_{10}\text{Si}$  [ $\text{M}$ ] $^+$ : 415.3722. Found: 415.3723.

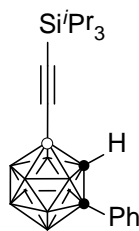

**3e:** Yield 77% (A). Colorless oil.  $^1\text{H}$  NMR (400 MHz,  $\text{CD}_2\text{Cl}_2$ ):  $\delta$  7.52 (d,  $J = 7.6$  Hz, 2H), 7.40 (m, 3H) (Ar), 4.25 (s, 1H) (cage *H*), 1.08 (m, 21H) ( $^i\text{Pr}_3\text{Si}$ ).  $^{13}\text{C}\{^1\text{H}\}$  NMR (100 MHz,  $\text{CD}_2\text{Cl}_2$ ):  $\delta$  133.5, 130.5, 129.3, 128.1 (Ar), 77.1, 62.4 (cage *C*), 18.8, 11.6 ( $^i\text{Pr}_3\text{Si}$ ) (alkynyl carbons were not observed).  $^{11}\text{B}\{^1\text{H}\}$  NMR (128 MHz,  $\text{CD}_2\text{Cl}_2$ ):  $\delta$  -3.2 (1B), -4.4 (1B), -9.1 (1B), -10.1 (1B), -12.1 (5B), -13.3 (1B). HRMS:  $m/z$  calcd for  $\text{C}_{19}\text{H}_{36}\text{B}_{10}\text{Si}$  [ $\text{M}$ ] $^+$ : 401.3564. Found: 401.3568.

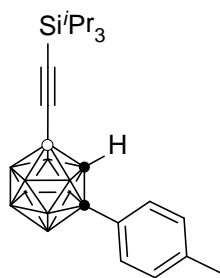

**3f:** Yield 82% (A). Colorless oil.  $^1\text{H}$  NMR (400 MHz,  $\text{CD}_2\text{Cl}_2$ ):  $\delta$  7.39 (d,  $J = 8.4$  Hz, 2H), 7.16 (d,  $J = 8.4$  Hz, 2H) (Ar), 4.20 (s, 1H) (cage *H*), 2.34 (s, 3H) ( $\text{CH}_3$ ), 1.08 (m, 21H) ( $^i\text{Pr}_3\text{Si}$ ).  $^{13}\text{C}\{^1\text{H}\}$  NMR (100 MHz,  $\text{CD}_2\text{Cl}_2$ ):  $\delta$  141.0, 130.6, 129.9, 128.0 (Ar), 77.3, 62.6 (cage *C*), 21.1 ( $\text{CH}_3$ ), 18.8,

11.6 ( $i\text{Pr}_3\text{Si}$ ) (alkynyl carbons were not observed).  $^{11}\text{B}\{^1\text{H}\}$  NMR (128 MHz,  $\text{CD}_2\text{Cl}_2$ ):  $\delta$  -3.9 (1B), -5.3 (1B), -9.9 (1B), -10.9 (1B), -12.8 (5B), -14.0 (1B). HRMS:  $m/z$  calcd for  $\text{C}_{20}\text{H}_{38}\text{B}_{10}\text{Si} [\text{M}]^+$ : 415.3722. Found: 415.3720.

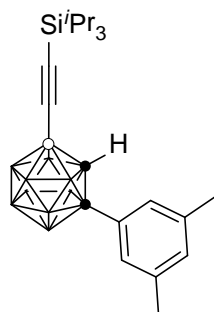

**3g:** Yield 70% (A), 30% (B). Colorless oil.  $^1\text{H}$  NMR (400 MHz,  $\text{CD}_2\text{Cl}_2$ ):  $\delta$  7.11 (s, 2H), 7.05 (s, 1H) (Ar), 4.22 (s, 1H) (cage  $H$ ), 2.32 (s, 6H) ( $\text{CH}_3$ ), 1.09 (m, 21H) ( $i\text{Pr}_3\text{Si}$ ).  $^{13}\text{C}\{^1\text{H}\}$  NMR (100 MHz,  $\text{CD}_2\text{Cl}_2$ ):  $\delta$  139.3, 133.5, 132.1, 125.9 (Ar), 77.5, 62.4 (cage  $C$ ), 21.4 ( $\text{CH}_3$ ), 18.8, 11.6 ( $i\text{Pr}_3\text{Si}$ )

(alkynyl carbons were not observed).  $^{11}\text{B}\{^1\text{H}\}$  NMR (128 MHz,  $\text{CD}_2\text{Cl}_2$ ):  $\delta$  -2.9 (1B), -4.0 (1B), -8.7 (1B), -9.8 (1B), -11.8 (5B), -13.1 (1B). HRMS:  $m/z$  calcd for  $\text{C}_{21}\text{H}_{40}\text{B}_{10}\text{Si} [\text{M}]^+$ : 429.3879. Found: 429.3875.

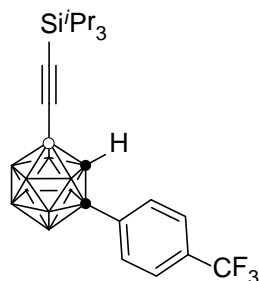

**3h:** Yield 81% (A). Colorless oil.  $^1\text{H}$  NMR (400 MHz,  $\text{CD}_2\text{Cl}_2$ ):  $\delta$  7.65 (m, 4H) (Ar), 4.27 (s, 1H) (cage  $H$ ), 1.08 (m, 21H) ( $i\text{Pr}_3\text{Si}$ ).  $^{13}\text{C}\{^1\text{H}\}$  NMR (100 MHz,  $\text{CDCl}_3$ ):  $\delta$  131.6, 128.4 (q,  $^2J_{\text{C-F}} = 36$  Hz), 128.3, 126.2 (q,  $^1J_{\text{C-F}} = 273$  Hz) ( $\text{CF}_3$ ), 126.1 (q,  $^3J_{\text{C-F}} = 4$  Hz) (Ar), 74.9,

61.4 (cage  $C$ ), 18.7, 11.3 ( $i\text{Pr}_3\text{Si}$ ) (alkynyl carbons were not observed).  $^{11}\text{B}\{^1\text{H}\}$  NMR (128 MHz,  $\text{CD}_2\text{Cl}_2$ ):  $\delta$  -3.0 (1B), -3.6 (1B), -9.4 (3B), -11.9 (4B), -13.0 (1B). HRMS:  $m/z$  calcd for  $\text{C}_{20}\text{H}_{35}\text{B}_{10}\text{SiF}_3 [\text{M}]^+$ : 469.3439. Found: 469.3435.

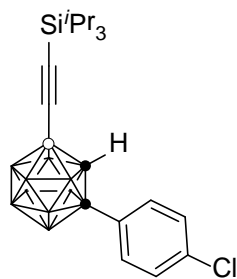

**3i:** Yield 72% (A). Colorless oil.  $^1\text{H}$  NMR (400 MHz,  $\text{CD}_2\text{Cl}_2$ ):  $\delta$  7.47 (d,  $J = 8.8$  Hz, 2H), 7.35 (d,  $J = 8.8$  Hz, 2H) (Ar), 4.20 (s, 1H) (cage  $H$ ), 1.07 (m, 21H) ( $i\text{Pr}_3\text{Si}$ ).  $^{13}\text{C}\{^1\text{H}\}$  NMR (100 MHz,  $\text{CD}_2\text{Cl}_2$ ):  $\delta$  136.9, 132.0, 129.7, 129.4 (Ar), 76.1, 62.5 (cage  $C$ ), 18.8, 11.6 ( $i\text{Pr}_3\text{Si}$ ) (alkynyl

carbons were not observed).  $^{11}\text{B}\{^1\text{H}\}$  NMR (128 MHz,  $\text{CD}_2\text{Cl}_2$ ):  $\delta$  -2.7 (1B), -3.8 (1B), -8.6

(1B), -9.6 (1B), -11.6 (6B). HRMS:  $m/z$  calcd for  $C_{19}H_{35}B_{10}SiCl$   $[M]^+$ : 434.3200. Found: 434.3202.

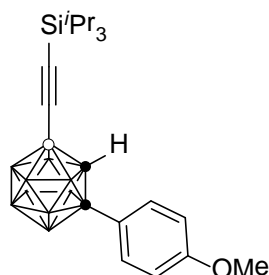

**3j:** Yield 78% (A). Colorless oil.  $^1H$  NMR (400 MHz,  $CD_2Cl_2$ ):  $\delta$  7.45 (d,  $J = 8.8$  Hz, 2H), 6.85 (d,  $J = 8.8$  Hz, 2H) (Ar), 4.16 (s, 1H) (cage  $H$ ), 3.80 (s, 3H) ( $OCH_3$ ), 1.08 (m, 21H) ( $iPr_3Si$ ).  $^{13}C\{^1H\}$  NMR (100 MHz,  $CD_2Cl_2$ ):  $\delta$  161.4, 129.8, 125.4, 114.4 (Ar), 77.5, 63.2 (cage  $C$ ), 55.9 ( $OCH_3$ ), 18.8, 11.6 ( $iPr_3Si$ ) (alkynyl carbons were not observed).  $^{11}B\{^1H\}$  NMR (128 MHz,  $CD_2Cl_2$ ):  $\delta$  -3.0 (1B), -4.6 (1B), -9.1 (1B), -10.2 (1B), -12.0 (6B). HRMS:  $m/z$  calcd for  $C_{20}H_{38}B_{10}SiO$   $[M]^+$ : 431.3671. Found: 431.3664.

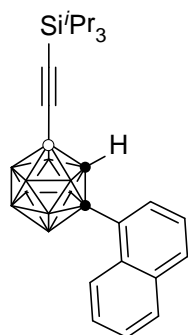

**3k:** Yield 40% (A). Colorless oil.  $^1H$  NMR (400 MHz,  $CD_2Cl_2$ ):  $\delta$  8.71 (d,  $J = 8.8$  Hz, 1H), 7.93 (t,  $J = 7.2$  Hz, 2H), 7.86 (d,  $J = 7.6$  Hz, 1H), 7.61 (t,  $J = 7.6$  Hz, 1H), 7.55 (t,  $J = 7.2$  Hz, 1H), 7.45 (t,  $J = 7.6$  Hz, 1H) (Ar), 4.90 (s, 1H) (cage  $H$ ), 1.10 (m, 21H) ( $iPr_3Si$ ).  $^{13}C\{^1H\}$  NMR (100 MHz,  $CD_2Cl_2$ ):  $\delta$  135.2, 132.4, 130.2, 129.1, 127.7, 126.5, 125.0, 124.6 (Ar), 78.0, 63.5 (cage  $C$ ), 18.8, 11.6 ( $iPr_3Si$ ) (alkynyl carbons were not observed).  $^{11}B\{^1H\}$  NMR (128 MHz,  $CD_2Cl_2$ ):  $\delta$  -2.6 (2B), -9.6 (5B), -12.2 (3B). HRMS:  $m/z$  calcd for  $C_{23}H_{38}B_{10}Si$   $[M]^+$ : 451.3724. Found: 451.3723.

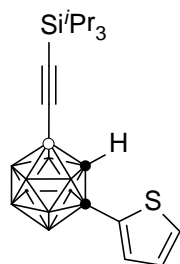

**3l:** Yield 54% (A). Colorless oil.  $^1H$  NMR (400 MHz,  $CD_2Cl_2$ ):  $\delta$  7.32 (d,  $J = 5.2$  Hz, 1H), 7.24 (d,  $J = 3.6$  Hz, 1H), 6.94 (t,  $J = 4.4$  Hz, 1H) (Ar), 4.15 (s, 1H) (cage  $H$ ), 1.08 (m, 21H) ( $iPr_3Si$ ).  $^{13}C\{^1H\}$  NMR (100 MHz,  $CD_2Cl_2$ ):  $\delta$  136.8, 130.7, 128.7, 127.8 (Ar), 72.5, 65.3 (cage  $C$ ), 18.8, 11.6 ( $iPr_3Si$ ) (alkynyl carbons were not observed).  $^{11}B\{^1H\}$  NMR (128 MHz,  $CD_2Cl_2$ ):  $\delta$  -2.4 (1B), -4.4



(1B), -9.2(1B), -10.4 (1B), -10.8 (2B), -11.9 (4B). HRMS:  $m/z$  calcd for  $C_{17}H_{34}B_{10}SiS [M]^+$ : 407.3128. Found: 407.3129.

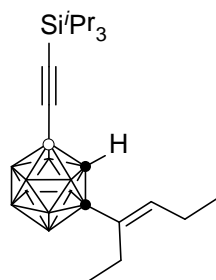

**3m:** Yield 80% (A). Colorless oil.  $^1H$  NMR (400 MHz,  $CDCl_3$ ):  $\delta$  5.72 (t,  $J = 7.2$  Hz, 1H) (olefinic), 3.89 (s, 1H) (cage  $H$ ), 2.20 (q,  $J = 7.6$  Hz, 2H), 2.07 (m, 2H) ( $CH_2$ ), 1.07 (m, 21H) ( $iPr_3Si$ ), 1.01 (t,  $J = 7.6$  Hz, 6H) ( $CH_3$ ).

$^{13}C\{^1H\}$  NMR (100 MHz,  $CDCl_3$ ):  $\delta$  136.2, 134.0 (olefinic), 78.8, 61.7

(cage  $C$ ), 24.2, 22.0 ( $CH_2$ ), 18.7 ( $iPr_3Si$ ), 13.9, 13.7 ( $CH_3$ ), 11.3 ( $iPr_3Si$ ) (alkynyl carbons were not observed).  $^{11}B\{^1H\}$  NMR (128 MHz,  $CDCl_3$ ):  $\delta$  -3.4 (1B), -4.2 (1B), -9.0 (1B), -10.1 (1B), -12.4 (6B). HRMS:  $m/z$  calcd for  $C_{19}H_{42}B_{10}Si [M]^+$ : 407.4034. Found: 407.4030.

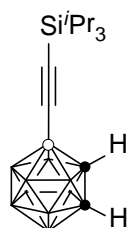

**3o:** Yield 41% (A), 74% (B). Colorless oil.  $^1H$  NMR (400 MHz,  $CD_2Cl_2$ ):  $\delta$  3.85 (s, 1H), 3.70 (s, 1H) (cage  $H$ ), 1.07 (m, 21H) ( $iPr_3Si$ ).  $^{13}C\{^1H\}$  NMR (100 MHz,

$CD_2Cl_2$ ):  $\delta$  56.7, 55.0 (cage  $C$ ), 18.8, 11.6 ( $iPr_3Si$ ) (alkynyl carbons were not

observed).  $^{11}B\{^1H\}$  NMR (128 MHz,  $CD_2Cl_2$ ):  $\delta$  -2.3 (1B), -3.5 (1B), -9.1(1B), -10.3 (1B), -12.7 (1B), -13.3 (1B), -14.3 (2B), -15.3 (1B), -16.4 (1B). HRMS:  $m/z$  calcd for  $C_{13}H_{32}B_{10}Si [M]^+$ : 324.3276. Found: 324.3280.

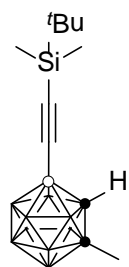

**3p:** Yield 70% (A), 72% (B). Colorless oil.  $^1H$  NMR (400 MHz,  $CDCl_3$ ):  $\delta$  3.77 (s, 1H) (cage  $H$ ), 2.05 (s, 3H) ( $CH_3$ ), 0.93 (s, 9H) ( $tBu$ ), 0.10 (s, 6H) ( $CH_3$ ).

$^{13}C\{^1H\}$  NMR (100 MHz,  $CDCl_3$ ):  $\delta$  70.3, 63.0 (cage  $C$ ), 26.2 ( $tBu$ ), 26.0, 16.8 ( $CH_3$ ) (alkynyl carbons were not observed).  $^{11}B\{^1H\}$  NMR (128 MHz,  $CDCl_3$ ):  $\delta$

-2.4 (1B), -6.2 (1B), -8.7 (1B), -9.8 (1B), -11.7 (6B). HRMS:  $m/z$  calcd for  $C_{11}H_{28}B_{10}Si [M]^+$ : 296.2965. Found: 296.2961.

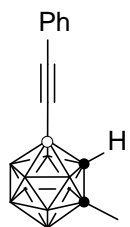

**3r:** Yield 52% (**B**). Colorless oil.  $^1\text{H}$  NMR (400 MHz,  $\text{CDCl}_3$ ):  $\delta$  7.46 (d,  $J = 7.6$  Hz, 2H), 7.30 (m, 3H) (Ar), 3.86 (s, 1H) (cage  $H$ ), 2.07 (s, 3H) ( $\text{CH}_3$ ).  $^{13}\text{C}\{^1\text{H}\}$  NMR (100 MHz,  $\text{CDCl}_3$ ):  $\delta$  132.2, 128.7, 128.4, 123.0 (Ar), 70.3, 62.9 (cage C), 26.1 ( $\text{CH}_3$ ) (alkynyl carbons were not observed).  $^{11}\text{B}\{^1\text{H}\}$  NMR (128 MHz,  $\text{CDCl}_3$ ):  $\delta$  -0.7 (1B), -4.6 (1B), -7.2 (1B), -8.2 (1B), -10.1 (5B), -11.4 (1B). HRMS:  $m/z$  calcd for  $\text{C}_{11}\text{H}_{18}\text{B}_{10}$  [ $\text{M}$ ] $^+$ : 258.2412. Found: 258.2413.

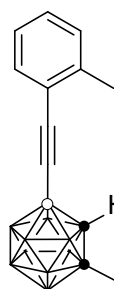

**3s:** Yield 65% (**B**). Colorless oil.  $^1\text{H}$  NMR (400 MHz,  $\text{CDCl}_3$ ):  $\delta$  7.41 (d,  $J = 7.6$  Hz, 1H), 7.19 (m, 2H), 7.11 (t,  $J = 7.6$  Hz, 1H) (Ar), 3.85 (s, 1H) (cage  $H$ ), 2.43 (s, 3H), 2.07 (s, 3H) ( $\text{CH}_3$ ).  $^{13}\text{C}\{^1\text{H}\}$  NMR (100 MHz,  $\text{CDCl}_3$ ):  $\delta$  141.1, 132.2, 129.5, 128.7, 125.6, 122.8 (Ar), 70.4, 62.9 (cage C), 26.1, 20.8 ( $\text{CH}_3$ ) (alkynyl carbons were not observed).  $^{11}\text{B}\{^1\text{H}\}$  NMR (128 MHz,  $\text{CDCl}_3$ ):  $\delta$  -2.7 (1B), -6.4 (1B), -8.9 (1B), -10.0 (1B), -11.9 (4B), -13.4 (2B). HRMS:  $m/z$  calcd for  $\text{C}_{12}\text{H}_{20}\text{B}_{10}$  [ $\text{M}$ ] $^+$ : 272.2568. Found: 272.2566.

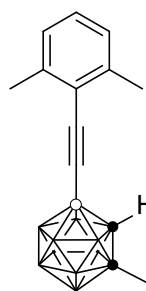

**3t:** Yield 73% (**B**). Colorless oil.  $^1\text{H}$  NMR (400 MHz,  $\text{CDCl}_3$ ):  $\delta$  7.10 (t,  $J = 7.6$  Hz, 1H), 7.01 (d,  $J = 7.6$  Hz, 2H) (Ar), 3.84 (s, 1H) (cage  $H$ ), 2.42 (s, 6H), 2.08 (s, 3H) ( $\text{CH}_3$ ).  $^{13}\text{C}\{^1\text{H}\}$  NMR (100 MHz,  $\text{CDCl}_3$ ):  $\delta$  141.0, 128.1, 126.7, 122.8 (Ar), 70.3, 62.9 (cage C), 26.1, 21.1 ( $\text{CH}_3$ ) (alkynyl carbons were not observed).  $^{11}\text{B}\{^1\text{H}\}$  NMR (128 MHz,  $\text{CDCl}_3$ ):  $\delta$  -1.3 (1B), -5.1 (1B), -7.7 (1B), -8.9 (1B), -10.2 (4B), -12.2 (2B). HRMS:  $m/z$  calcd for  $\text{C}_{13}\text{H}_{22}\text{B}_{10}$  [ $\text{M}$ ] $^+$ : 286.2725. Found: 286.2730.

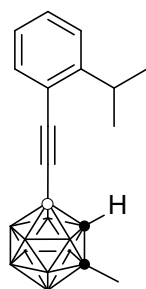

**3u:** Yield 80% (**B**). Colorless oil.  $^1\text{H}$  NMR (400 MHz,  $\text{CDCl}_3$ ):  $\delta$  7.42 (d,  $J = 7.2$  Hz, 1H), 7.29 (m, 2H), 7.13 (t,  $J = 7.6$  Hz, 1H) (Ar), 3.84 (s, 1H) (cage  $H$ ), 3.42 (m, 1H) ( $i\text{Pr}$ ), 2.08 (s, 3H) ( $\text{CH}_3$ ), 1.27 (d,  $J = 7.2$  Hz, 6H) ( $i\text{Pr}$ ).  $^{13}\text{C}\{^1\text{H}\}$

NMR (100 MHz, CDCl<sub>3</sub>):  $\delta$  151.4, 132.7, 129.1, 125.5, 125.0, 121.8 (Ar), 70.4, 62.8 (cage C), 31.8, 26.1, 23.0 (alkyl C) (alkynyl carbons were not observed). <sup>11</sup>B{<sup>1</sup>H} NMR (128 MHz, CDCl<sub>3</sub>):  $\delta$  -2.6 (1B), -6.4 (1B), -9.0 (1B), -10.1 (1B), -11.5 (5B), -13.4 (1B). HRMS: *m/z* calcd for C<sub>14</sub>H<sub>24</sub>B<sub>10</sub> [M]<sup>+</sup>: 300.2881. Found: 300.2882.

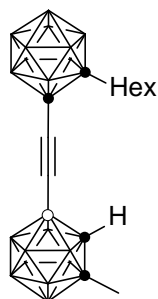

**3v**: Yield 82% (**B**). Colorless oil. <sup>1</sup>H NMR (400 MHz, CDCl<sub>3</sub>):  $\delta$  3.81 (s, 1H) (cage H), 2.32 (m, 2H) (Hex), 2.06 (s, 3H) (CH<sub>3</sub>), 1.53 (m, 2H), 1.30 (m, 6H), 0.89 (t, *J* = 6.8 Hz, 3H) (Hex). <sup>13</sup>C{<sup>1</sup>H} NMR (100 MHz, CDCl<sub>3</sub>):  $\delta$  82.3, 70.8, 66.8, 62.6 (cage C), 36.2, 31.5, 29.7, 29.0, 26.0, 22.7, 14.1 (alkyl C) (alkynyl carbons were not observed).

<sup>11</sup>B{<sup>1</sup>H} NMR (128 MHz, CDCl<sub>3</sub>):  $\delta$  -2.1 (1B), -3.2 (1B), -6.3 (2B), -9.8 (8B), -11.9 (7B), -13.5 (1B). HRMS: *m/z* calcd for C<sub>13</sub>H<sub>36</sub>B<sub>20</sub> [M]<sup>+</sup>: 408.4823. Found: 408.4826.

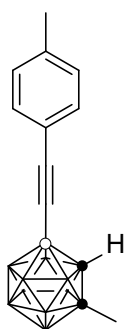

**3w**: Yield 48% (**B**). Colorless oil. <sup>1</sup>H NMR (400 MHz, CDCl<sub>3</sub>):  $\delta$  7.35 (d, *J* = 7.6 Hz, 2H), 7.10 (d, *J* = 8.0 Hz, 2H) (Ar), 3.85 (s, 1H) (cage H), 2.34 (s, 3H), 2.07 (s, 3H) (CH<sub>3</sub>). <sup>13</sup>C{<sup>1</sup>H} NMR (100 MHz, CDCl<sub>3</sub>):  $\delta$  138.9, 132.1, 129.1, 119.9 (Ar), 70.3, 62.9 (cage C), 26.1, 21.7 (CH<sub>3</sub>) (alkynyl carbons were not observed).

<sup>11</sup>B{<sup>1</sup>H} NMR (128 MHz, CDCl<sub>3</sub>):  $\delta$  -2.3 (1B), -6.2 (1B), -8.8 (1B), -9.9 (1B), -11.6 (6B). HRMS: *m/z* calcd for C<sub>12</sub>H<sub>20</sub>B<sub>10</sub> [M]<sup>+</sup>: 272.2568. Found: 272.2571.

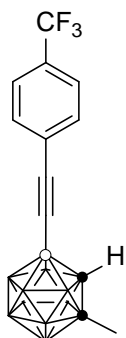

**3x**: Yield 44% (**B**). Colorless oil. <sup>1</sup>H NMR (400 MHz, CDCl<sub>3</sub>):  $\delta$  7.56 (m, 4H) (Ar), 3.87 (s, 1H) (cage H), 2.08 (s, 3H) (CH<sub>3</sub>). <sup>13</sup>C{<sup>1</sup>H} NMR (100 MHz, CDCl<sub>3</sub>):  $\delta$  132.4, 130.4 (q, <sup>1</sup>*J*<sub>C-F</sub> = 272 Hz) (CF<sub>3</sub>), 130.0 (q, <sup>2</sup>*J*<sub>C-F</sub> = 33 Hz), 126.9, 125.3 (q, <sup>3</sup>*J*<sub>C-F</sub> = 4 Hz) (Ar), 70.5, 62.8 (cage C), 26.1 (CH<sub>3</sub>) (alkynyl carbons were not observed).

<sup>11</sup>B{<sup>1</sup>H} NMR (128 MHz, CDCl<sub>3</sub>):  $\delta$  -2.3 (1B), -6.3 (1B),

-8.9 (1B), -9.9 (1B), -11.9 (6B). HRMS:  $m/z$  calcd for  $C_{12}H_{17}B_{10}F_3 [M]^+$ : 327.2249. Found: 327.2250.

### Control Experiments.

**Reaction of 1a with 2 in the presence of Pd(dba)<sub>2</sub> without AgOAc. Method A:** A DCE solution (5 mL) of **1a** (40.4 mg, 0.20 mmol),  $iPr_3SiC\equiv CBr$  (52.3 mg, 0.20 mmol) and Pd(dba)<sub>2</sub> (23.0 mg, 0.04 mmol) was stirred at 90 °C for 6 h. **Method B:** To a toluene solution (5 mL) of **1a** (40.4 mg, 0.20 mmol), K<sub>2</sub>HPO<sub>4</sub> (69.6 mg, 0.40 mmol), and Pd(dba)<sub>2</sub> (23.0 mg, 0.04 mmol) was slowly added  $iPr_3SiC\equiv CH$  (72.8 mg, 0.40 mmol in 5 mL toluene) by a syringe pump over a period of 10 h at 80 °C. After hydrolysis with water, the organic portion was analyzed by <sup>11</sup>B NMR and GC-MS. The <sup>11</sup>B NMR showed that **1a** remained unchanged. GC-MS analyses indicated that only decarboxylation product 1-Me-*o*-carborane was present. Noted that **1a** decomposed into 1-Me-*o*-carborane under GC conditions, which was confirmed by an authenticated sample.

**Reaction of 1a with 2 in the presence of Pd(OAc)<sub>2</sub> without AgOAc. Method A:** A DCE solution (5 mL) of **1a** (40.4 mg, 0.20 mmol),  $iPr_3SiC\equiv CBr$  (52.3 mg, 0.20 mmol) and Pd(OAc)<sub>2</sub> (9.0 mg, 0.04 mmol) was heated at 90 °C for 6 h. **Method B:** To a toluene solution (5 mL) of **1a** (40.4 mg, 0.20 mmol), K<sub>2</sub>HPO<sub>4</sub> (69.6 mg, 0.40 mmol), and Pd(OAc)<sub>2</sub> (9.0 mg, 0.04 mmol) was slowly added  $iPr_3SiC\equiv CH$  (72.8 mg, 0.40 mmol in 5 mL toluene) by a syringe pump over a period of 10 h at 80 °C. After hydrolysis with water, the organic portion was analyzed by <sup>11</sup>B NMR and GC-MS. The <sup>11</sup>B NMR showed that **3a** was formed in 25% (by **Method A**) and 14% (by **Method B**) NMR yield. GC-MS analyses indicated that **3a** was generated in 30% (by **Method A**) and 16% (by **Method B**) GC yield.

**Decarboxylation Reactions.** A DCE solution (0.5 mL) of carboranyl carboxylic acid (0.01 mmol) and additive was heated in a closed NMR tube at 90 °C, which was monitored by  $^{11}\text{B}$  NMR spectra. The time-dependent  $^{11}\text{B}$  NMR spectra were compiled below.

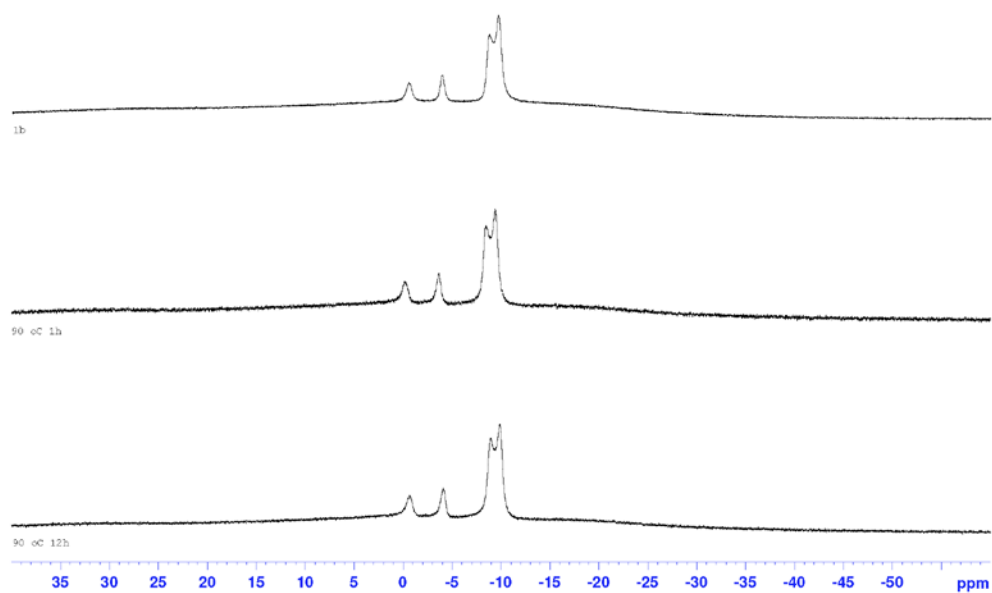

**Figure S1.** Time-Dependent  $^{11}\text{B}$  NMR Spectra for Decarboxylation of **1b**

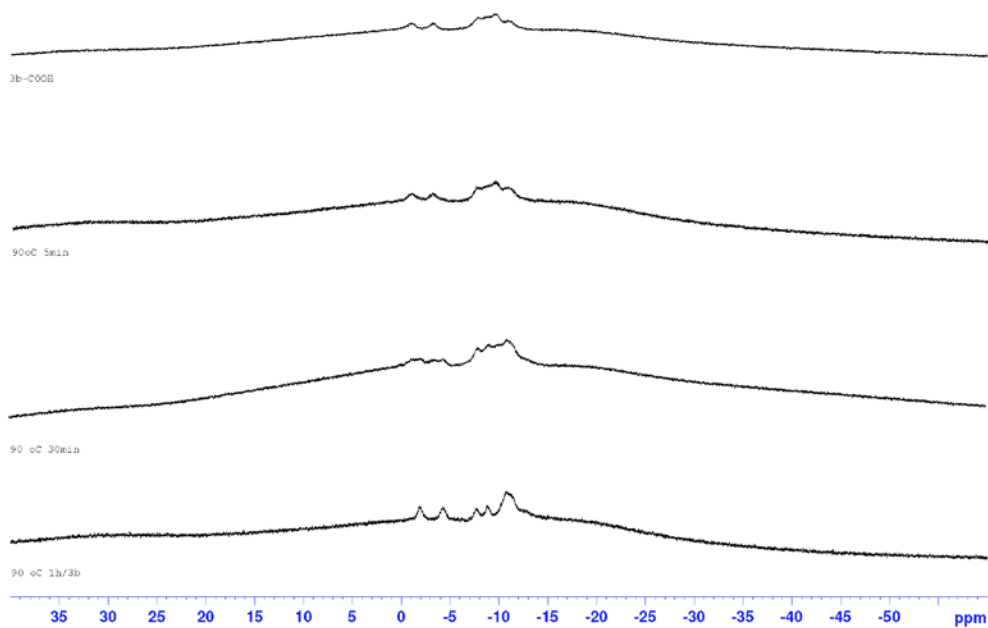

**Figure S2.** Time-Dependent  $^{11}\text{B}$  NMR Spectra for Decarboxylation of **3b**-COOH

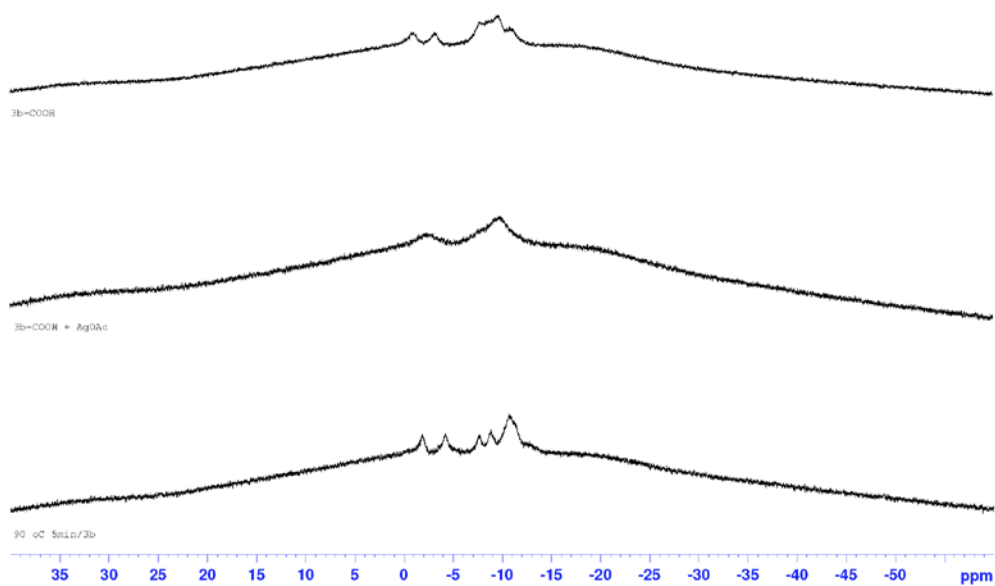

**Figure S3.** Time-Dependent  $^{11}\text{B}$  NMR Spectra for Decarboxylation of **3b**-COOH in the presence of AgOAc

## Transformations of 3a.

**Desilylation of 3a.** Compound **3a** (67.6 mg, 0.20 mmol) and TBAF (0.2 mL, 1M in THF) were mixed in THF (5 mL). The resulting mixture was stirred at 0 °C for 1 min. After hydrolysis with water (10 mL) and extraction with diethyl ether (10 mL x 3), the ether solutions were combined and concentrated to dryness in vacuo. The residue was subjected to flash column chromatography to give the product **4a** as colorless crystals (34.6 mg, 95%).

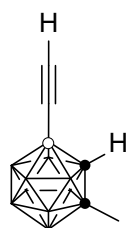

**4a.**  $^1\text{H}$  NMR (400 MHz,  $\text{CDCl}_3$ ):  $\delta$  3.81 (s, 1H) (cage *H*), 2.20 (s, 1H) (alkynyl), 2.06 (s, 3H) ( $\text{CH}_3$ ).  $^{13}\text{C}\{^1\text{H}\}$  NMR (100 MHz,  $\text{CDCl}_3$ ):  $\delta$  85.4 (alkynyl), 70.5, 63.0 (cage *C*), 26.0 ( $\text{CH}_3$ ) (one alkynyl carbons was observed, the other was not).

$^{11}\text{B}\{^1\text{H}\}$  NMR (128 MHz,  $\text{CDCl}_3$ ):  $\delta$  -0.2 (1B), -4.2 (1B), -6.8 (1B), -7.8 (1B), -9.0 (2B), -9.8 (2B), -10.8 (2B). HRMS:  $m/z$  calcd for  $\text{C}_5\text{H}_{14}\text{B}_{10} [\text{M}]^+$ : 182.2096. Found: 182.2094.

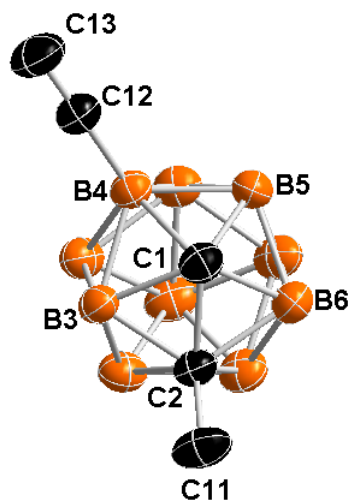

**Figure S4.** Molecular Structure of **4a**

**Reaction of 4a with PhI.** Compound **4a** (36.4 mg, 0.20 mmol), PhI (81.6 mg, 0.40 mmol),  $\text{PdCl}_2(\text{PPh}_3)_2$  (7.0 mg, 0.01 mmol), CuI (3.8 mg, 0.02 mmol) and  $\text{NEt}_3$  (1.0 mL) were mixed in toluene (4 mL). The resulting mixture was heated at 80 °C for 12 h. After hydrolysis with water (10 mL) and extraction with diethyl ether (10 mL x 3), the ether solutions were

combined and concentrated to dryness in vacuo. The residue was subjected to flash column chromatography to give the product **3r** as colorless oil (47.5 mg, 92%).

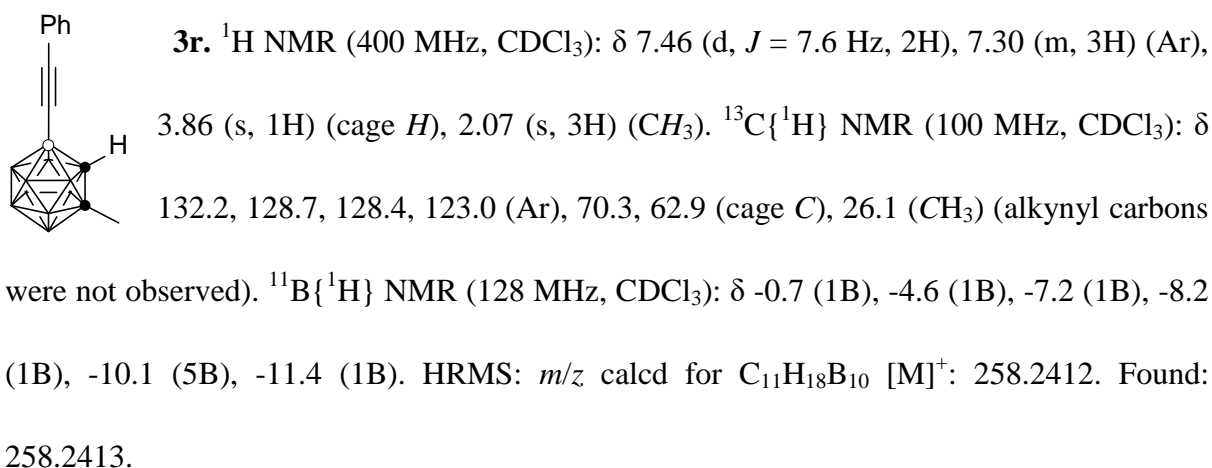

**Reaction of 4a with 2-Bromothiophene.** Compound **4a** (36.4 mg, 0.20 mmol), 2-bromothiophene (65.2 mg, 0.40 mmol),  $\text{PdCl}_2(\text{PPh}_3)_2$  (7.0 mg, 0.01 mmol), CuI (3.8 mg, 0.02 mmol) and  $\text{NEt}_3$  (1.0 mL) were mixed in toluene (4 mL). The resulting mixture was heated at 80 °C for 12 h. After hydrolysis with water (10 mL) and extraction with diethyl ether (10 mL x 3), the ether solutions were combined and concentrated to dryness in vacuo. The residue was subjected to flash column chromatography to give the product **5a** as colorless oil (47.6 mg, 90%).

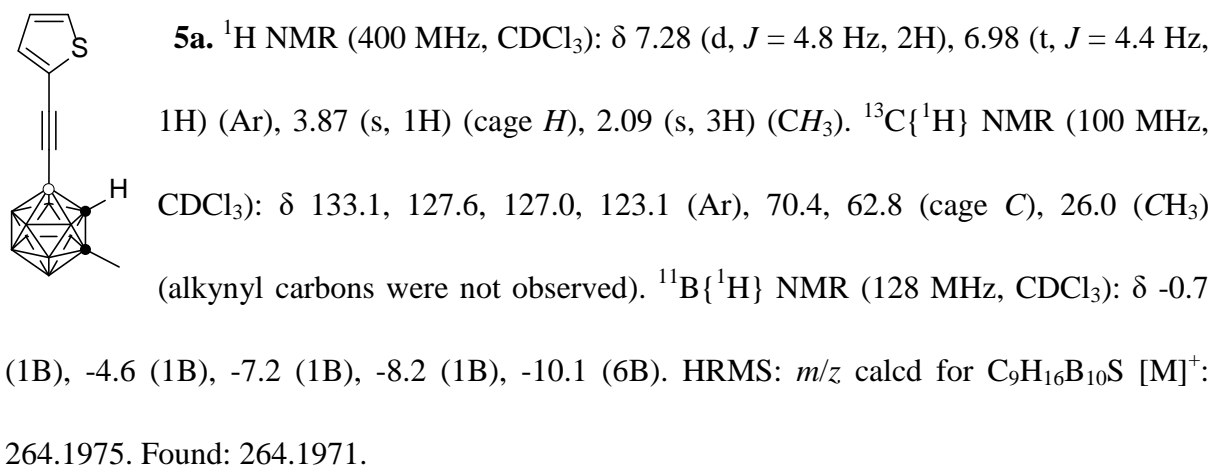



**Homocoupling Reaction of 4a.** Compound **4a** (36.4 mg, 0.20 mmol), CuCl (1.0 mg, 0.01 mmol) and TMEDA (1.2 mg, 0.01 mmol) were mixed in acetone (5 mL). The resulting mixture was heated at 100 °C for 24 h in a closed flask. After hydrolysis with water (10 mL) and extraction with diethyl ether (10 mL x 3), the ether solutions were combined and concentrated to dryness in vacuo. The residue was subjected to flash column chromatography to give the product **6a** as colorless crystals (30.4 mg, 84%).

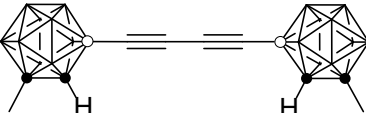
**6a.**  $^1\text{H}$  NMR (400 MHz,  $\text{CDCl}_3$ ):  $\delta$  3.77 (s, 2H) (cage H), 2.04 (s, 6H) ( $\text{CH}_3$ ).  $^{13}\text{C}\{^1\text{H}\}$  NMR (100 MHz,  $\text{CDCl}_3$ ):  $\delta$  70.6, 62.8 (cage C), 26.0 ( $\text{CH}_3$ ) (alkynyl carbons were not observed).  $^{11}\text{B}\{^1\text{H}\}$  NMR (128 MHz,  $\text{CDCl}_3$ ):  $\delta$  -0.4 (1B), -4.4 (1B), -7.1 (1B), -7.9 (1B), -9.3 (2B), -10.0 (2B), -11.1 (2B). HRMS:  $m/z$  calcd for  $\text{C}_{10}\text{H}_{26}\text{B}_{20}$   $[\text{M}]^+$ : 362.4041. Found: 362.4041.

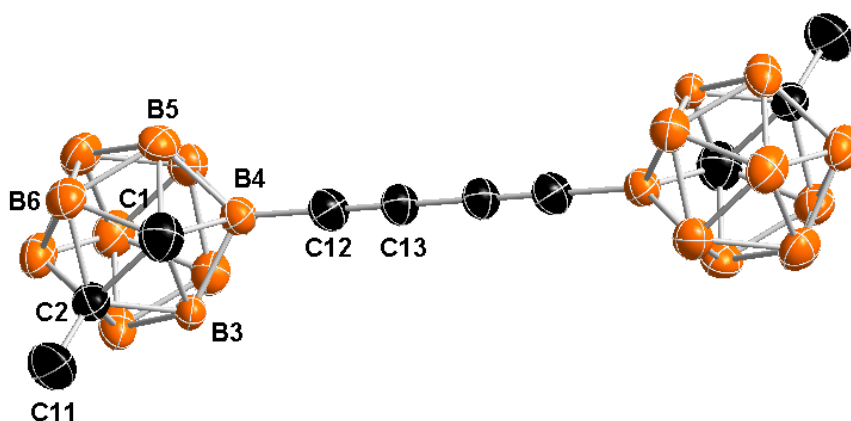

**Figure S5.** Molecular Structure of **6a**

**Reaction of 4a with  $\text{PhN}_3$ .** Compound **4a** (36.4 mg, 0.20 mmol),  $\text{PhN}_3$  (47.6 mg, 0.40 mmol) and CuI (7.6 mg, 0.04 mmol) were mixed in DMSO (5 mL). The resulting mixture was stirred at room temperature for 36 h. After hydrolysis with water (10 mL) and extraction

with diethyl ether (10 mL x 3), the ether solutions were combined and dried with anhydrous Na<sub>2</sub>SO<sub>4</sub>. Removal of solvent gave **7a** as brown oil. (57.2 mg, 95%).

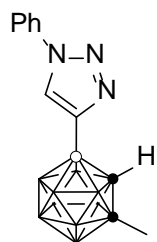

**7a.** <sup>1</sup>H NMR (400 MHz, CDCl<sub>3</sub>): δ 8.03 (s, 1H), 7.73 (d, *J* = 7.6 Hz, 2H), 7.53 (t, *J* = 7.6 Hz, 2H), 7.44 (t, *J* = 7.2 Hz, 1H) (Ar), 4.49 (s, 1H) (cage *H*), 2.13 (s, 3H) (CH<sub>3</sub>). <sup>13</sup>C{<sup>1</sup>H} NMR (100 MHz, CDCl<sub>3</sub>): δ 136.9, 129.9, 129.0, 120.9 (Ar), 71.1, 62.4 (cage *C*), 26.0 (CH<sub>3</sub>). <sup>11</sup>B{<sup>1</sup>H} NMR (128 MHz, CDCl<sub>3</sub>): δ -0.3

(1B), -4.6 (2B), -7.3 (2B), -9.3 (5B). HRMS: *m/z* calcd for C<sub>11</sub>H<sub>19</sub>B<sub>10</sub>N<sub>3</sub> [M+H]<sup>+</sup>: 302.2660.

Found: 302.2661.

**X-ray Structure Determination.** X-ray data of **4a** and **6a** were collected at 293 K on a Bruker SMART 1000 CCD diffractometer using Mo-Kα radiation. An empirical absorption correction was applied using the SADABS program.<sup>4</sup> All structures were solved by direct methods and subsequent Fourier difference techniques and refined anisotropically for all non-hydrogen atoms by full-matrix least squares calculations on *F*<sup>2</sup> using the SHELXTL program package.<sup>5</sup> All hydrogen atoms were geometrically fixed using the riding model. Crystal data and details of data collection and structure refinements are given in Table S1. Details of the crystal structures were deposited in the Cambridge Crystallographic Data Centre with CCDC 1455897-1455898 for **4a** and **6a**.

**Table S1.** Crystal Data and Summary of Data Collection and Refinement for **4a** and **6a**

| compd                                         | <b>4a</b>                                      | <b>6a</b>                                       |
|-----------------------------------------------|------------------------------------------------|-------------------------------------------------|
| formula                                       | C <sub>5</sub> H <sub>14</sub> B <sub>10</sub> | C <sub>10</sub> H <sub>26</sub> B <sub>20</sub> |
| cryst size (mm)                               | 0.50x0.40x0.30                                 | 0.50x0.40x0.30                                  |
| fw                                            | 182.26                                         | 362.51                                          |
| cryst syst                                    | monoclinic                                     | monoclinic                                      |
| space group                                   | <i>P</i> 2 <sub>1</sub> / <i>n</i>             | <i>P</i> 2 <sub>1</sub> / <i>n</i>              |
| <i>a</i> , Å                                  | 12.173(1)                                      | 6.818(1)                                        |
| <i>b</i> , Å                                  | 7.921(1)                                       | 13.857(1)                                       |
| <i>c</i> , Å                                  | 12.723(1)                                      | 11.619(1)                                       |
| <i>β</i> , deg                                | 112.68(1)                                      | 91.19(1)                                        |
| <i>V</i> , Å <sup>3</sup>                     | 1131.89(15)                                    | 1097.54(19)                                     |
| <i>Z</i>                                      | 4                                              | 2                                               |
| <i>D</i> <sub>calcd</sub> , Mg/m <sup>3</sup> | 1.070                                          | 1.097                                           |
| radiation (λ), Å                              | 0.71073                                        | 0.71073                                         |
| 2θ range, deg                                 | 3.9 to 50.5                                    | 4.6 to 50.5                                     |
| μ, mm <sup>-1</sup>                           | 0.047                                          | 0.048                                           |
| <i>F</i> (000)                                | 376                                            | 372                                             |
| no. of obsd reflns                            | 2050                                           | 1973                                            |
| no. of params refnd                           | 136                                            | 136                                             |
| goodness of fit                               | 1.679                                          | 1.050                                           |
| R1                                            | 0.119                                          | 0.084                                           |
| wR2                                           | 0.398                                          | 0.240                                           |

## References

- 1 R. A. Kasar, G. M. Knudsen, S. B. Kahl, *Inorg. Chem.*, 1999, **38**, 2936-2940.
- 2 R. Frei, J. Waser, *J. Am. Chem. Soc.*, 2013, **135**, 9620-9623.
- 3 C. Tang, Z. Xie, *Angew. Chem. Int. Ed.*, 2015, **54**, 7662-7665.
- 4 G. M. Sheldrick, SADABS: Program for Empirical Absorption Correction of Area Detector Data. University of Göttingen: Germany, 1996.
- 5 G. M. Sheldrick, SHELXTL 5.10 for Windows NT: Structure Determination Software Programs. Bruker Analytical X-ray Systems, Inc., Madison, Wisconsin, USA, 1997.

8.503

7.544  
7.523  
7.172  
7.152

5.322  
5.320  
5.318

2.348

qyj-H-pMe-CD2Cl2

Current Data Parameters  
 NAME qyj-H-pMe-CD2Cl2  
 EXPNO 1  
 PROCNO 1

F2 - Acquisition Parameters  
 Date\_ 20150624  
 Time 12.19 h  
 INSTRUM spect  
 PROBHD Z108618\_0257 (  
 PULPROG zg30  
 TD 65536  
 SOLVENT CD2Cl2  
 NS 8  
 DS 2  
 SWH 8012.820 Hz  
 FIDRES 0.122266 Hz  
 AQ 4.0894465 sec  
 RG 144  
 DW 62.400 usec  
 DE 6.50 usec  
 TE 295.2 K  
 D1 1.00000000 sec  
 TD0 1  
 SFO1 400.2324714 MHz  
 NUC1 1H  
 P1 12.80 usec  
 PLW1 13.56000042 W

F2 - Processing parameters  
 SI 65536  
 SF 400.2300159 MHz  
 WDW EM  
 SSB 0  
 LB 0.30 Hz  
 GB 0  
 PC 1.00

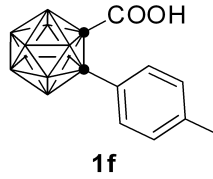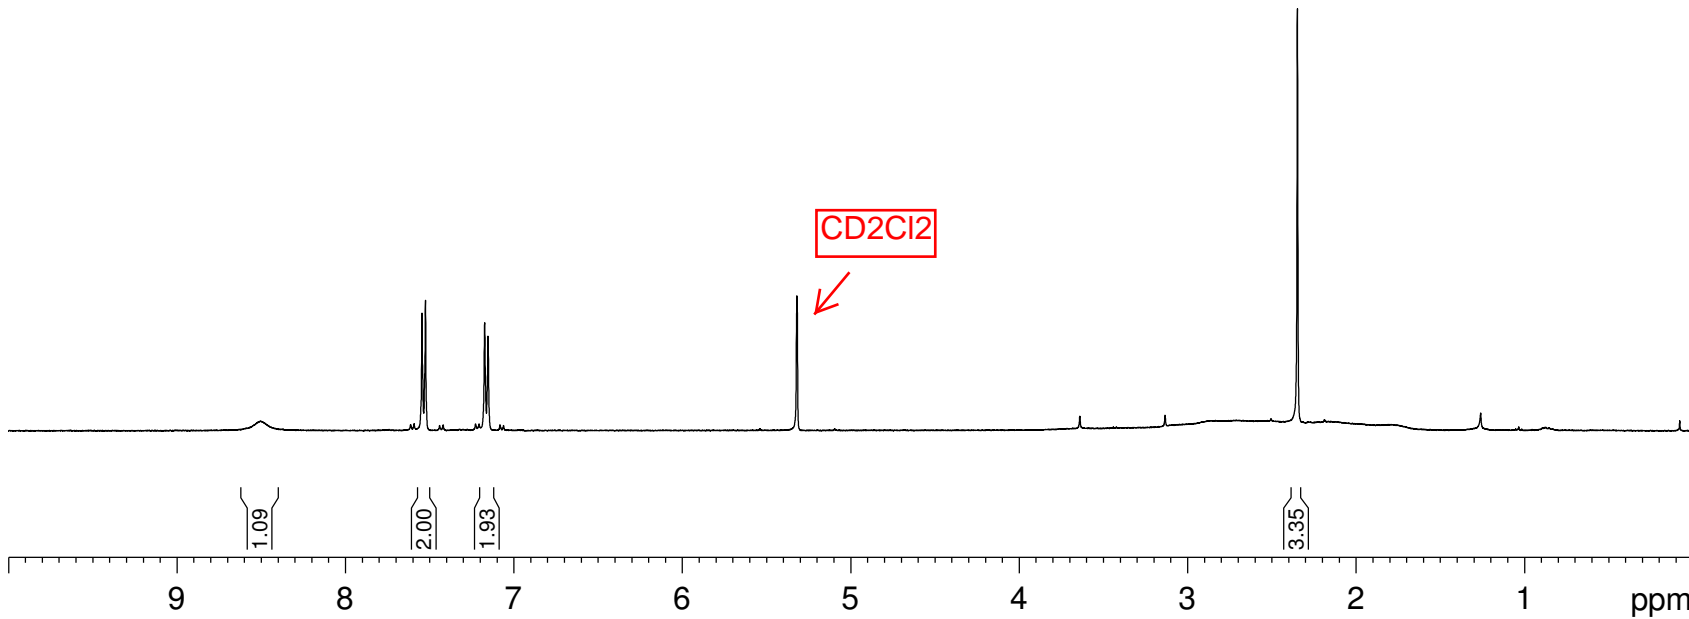

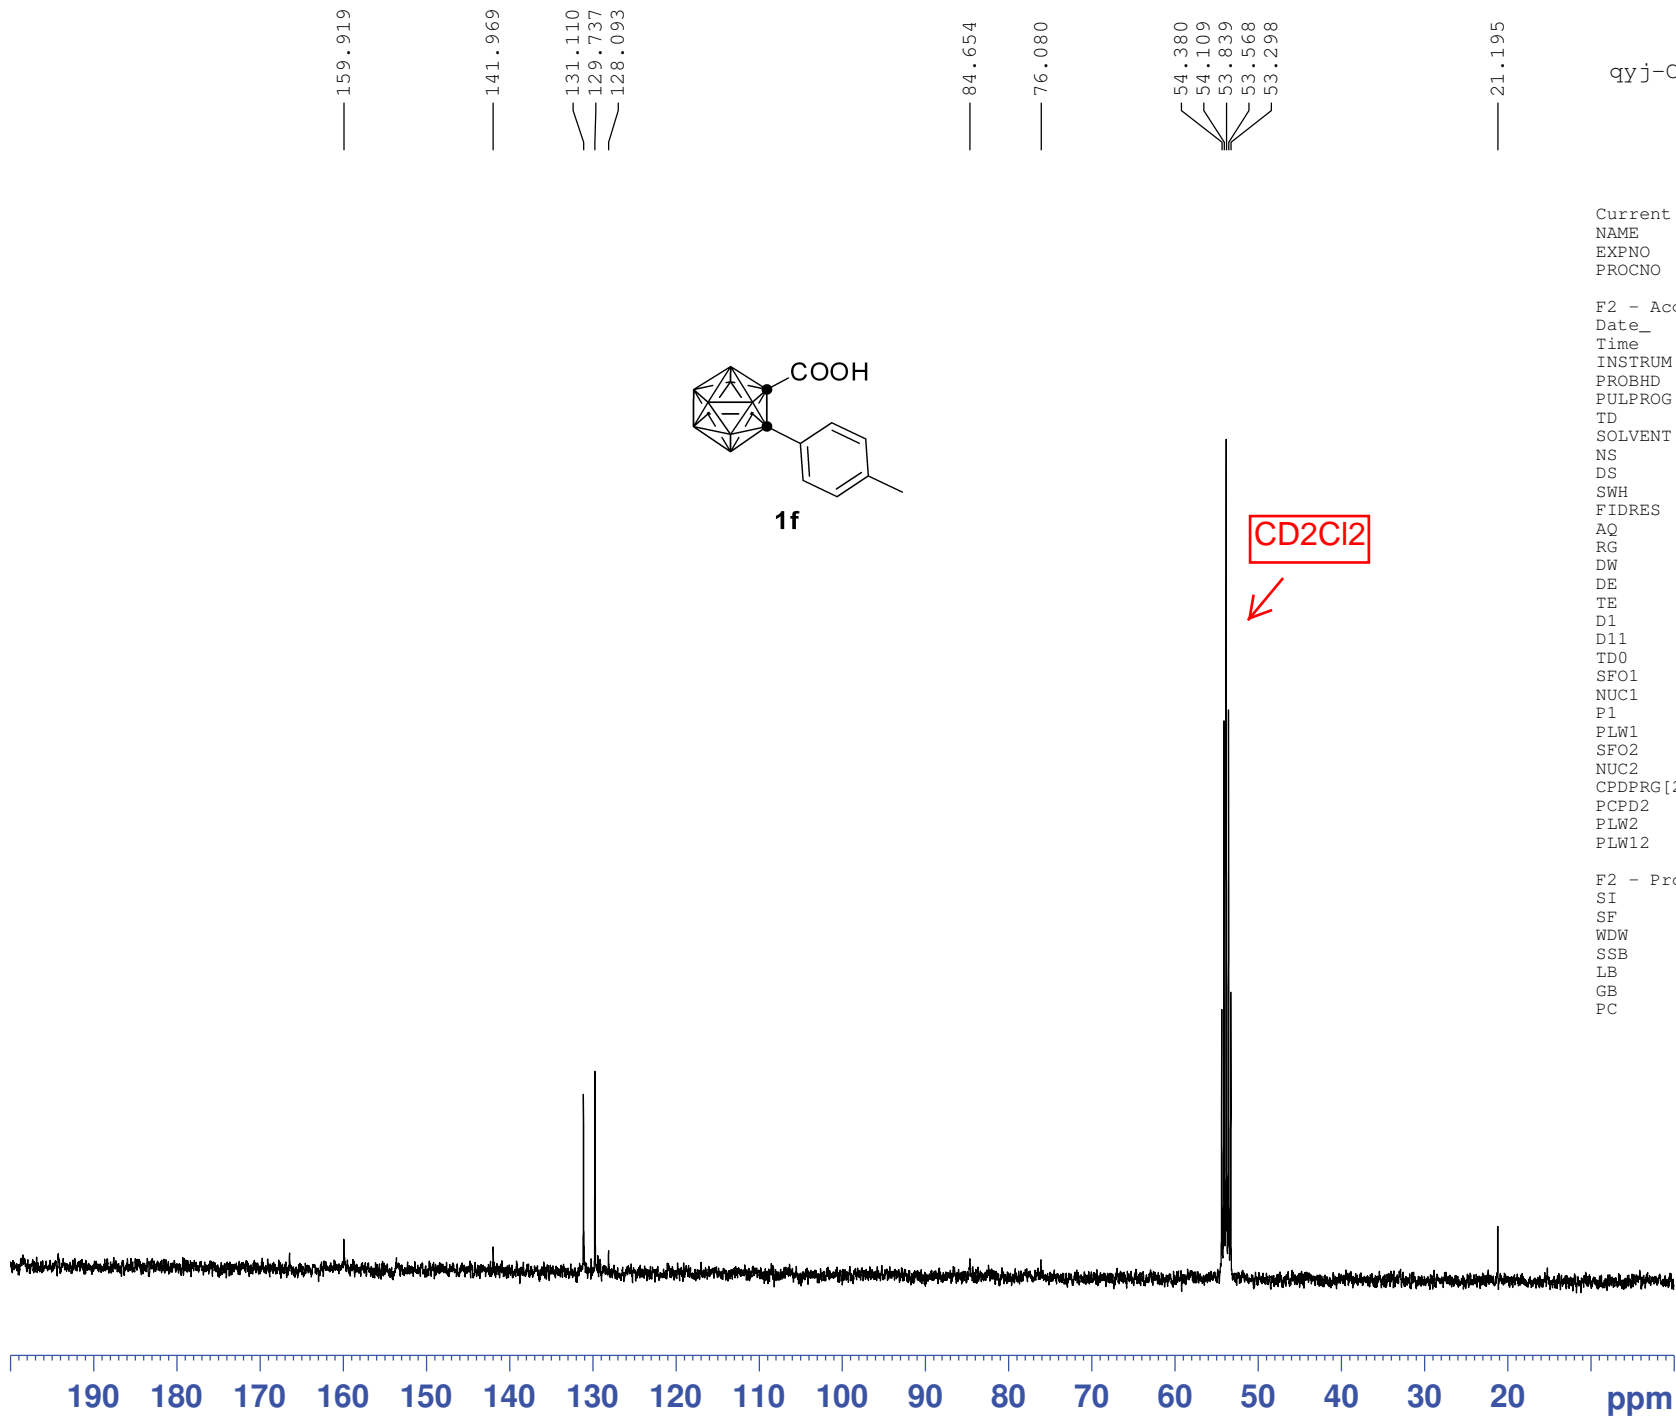

qyj-C-pMe-CD2Cl2

Current Data Parameters  
 NAME qyj-C-pMe-CD2Cl2  
 EXPNO 1  
 PROCNO 1

F2 - Acquisition Parameters  
 Date\_ 20150625  
 Time 8.57 h  
 INSTRUM spect  
 PROBHD Z824601\_0021 (  
 PULPROG zgdc  
 TD 131072  
 SOLVENT CD2Cl2  
 NS 1156  
 DS 0  
 SWH 25252.525 Hz  
 FIDRES 0.192661 Hz  
 AQ 2.5952256 sec  
 RG 203  
 DW 19.800 usec  
 DE 6.50 usec  
 TE 295.3 K  
 D1 1.00000000 sec  
 D11 0.03000000 sec  
 TD0 1  
 SFO1 100.6227690 MHz  
 NUC1 13C  
 P1 9.50 usec  
 PLW1 41.25000000 W  
 SFO2 400.1320007 MHz  
 NUC2 1H  
 CPDPRG[2] waltz16  
 PCPD2 90.00 usec  
 PLW2 8.31000042 W  
 PLW12 0.23083000 W

F2 - Processing parameters  
 SI 131072  
 SF 100.6127265 MHz  
 WDW EM  
 SSB 0  
 LB 3.00 Hz  
 GB 0  
 PC 1.40

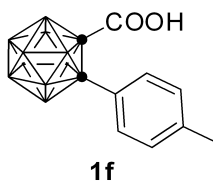

— 0.81 —  
 — 2.34 —  
 — 8.45 —

qyj-B-pMe-CDC13

Current Data Parameters  
 NAME qyj-B-pMe-CDC13  
 EXPNO 1  
 PROCNO 1

F2 - Acquisition Parameters  
 Date\_ 20150624  
 Time 12.56 h  
 INSTRUM spect  
 PROBHD Z108618\_0257 (  
 PULPROG zgpg30  
 TD 65536  
 SOLVENT CD2C12  
 NS 64  
 DS 4  
 SWH 29761.904 Hz  
 FIDRES 0.454131 Hz  
 AQ 1.1010048 sec  
 RG 575  
 DW 16.800 usec  
 DE 6.50 usec  
 TE 295.6 K  
 D1 2.00000000 sec  
 D11 0.03000000 sec  
 TD0 1  
 SFO1 128.4096890 MHz  
 NUC1 11B  
 P1 7.50 usec  
 PLW1 55.09999847 W  
 SFO2 400.2316008 MHz  
 NUC2 1H  
 CPDPRG[2] waltz16  
 PCPD2 90.00 usec  
 PLW2 13.56000042 W  
 PLW12 0.27428001 W  
 PLW13 0.13796000 W

F2 - Processing parameters  
 SI 32768  
 SF 128.4095347 MHz  
 WDW EM  
 SSB 0  
 LB 1.00 Hz  
 GB 0  
 PC 1.40

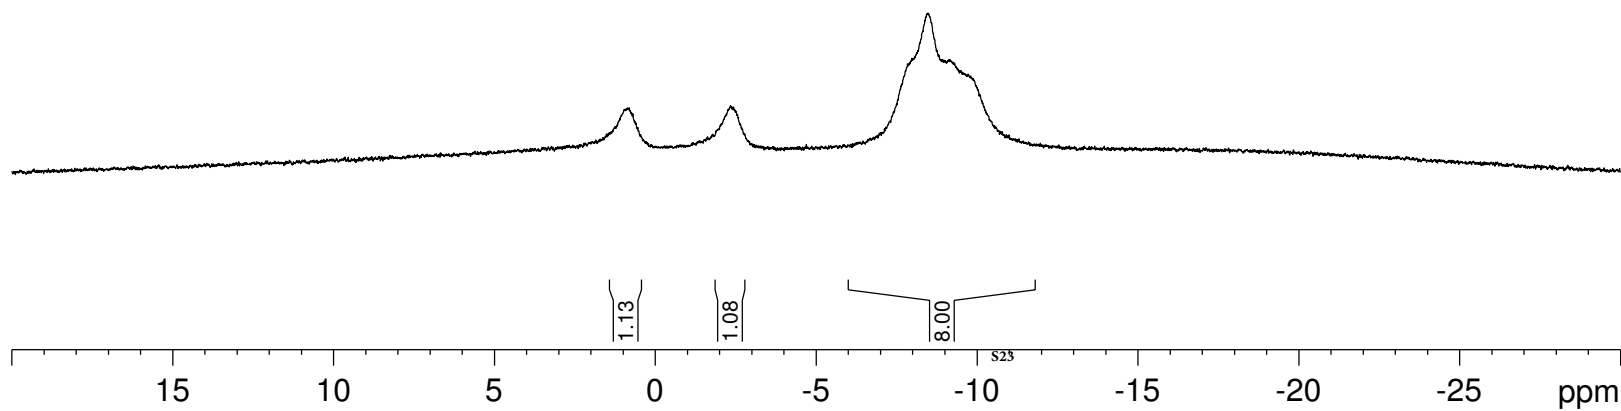

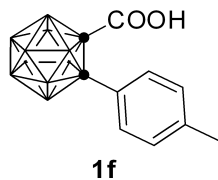

0.31  
-0.84  
-2.93  
-4.15  
-8.43  
-9.07  
-10.23  
-10.95  
-11.62

qyj-B-pMe-CDC13 (C)

Current Data Parameters  
 NAME qyj-B-pMe-CDC13 (C)  
 EXPNO 1  
 PROCNO 1

F2 - Acquisition Parameters  
 Date\_ 20150624  
 Time 13.00 h  
 INSTRUM spect  
 PROBHD Z108618\_0257 (  
 PULPROG zg  
 TD 65536  
 SOLVENT CD2Cl2  
 NS 40  
 DS 4  
 SWH 25510.203 Hz  
 FIDRES 0.389255 Hz  
 AQ 1.2845056 sec  
 RG 322  
 DW 19.600 usec  
 DE 6.50 usec  
 TE 295.4 K  
 D1 1.00000000 sec  
 TD0 1  
 SFO1 128.4096891 MHz  
 NUC1 11B  
 P1 7.50 usec  
 PLW1 55.09999847 W

F2 - Processing parameters  
 SI 32768  
 SF 128.4096891 MHz  
 WDW EM  
 SSB 0  
 LB 1.00 Hz  
 GB 0  
 PC 1.40

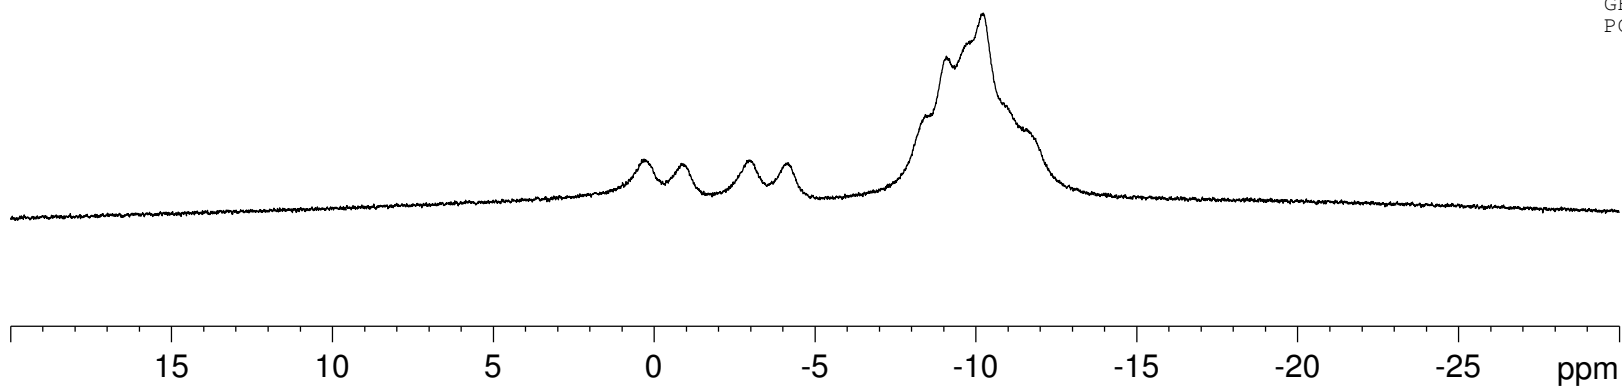



7.923  
7.825  
7.805  
7.648  
7.627

5.322  
5.320

qyj-H-SM-pCF3-CD2Cl2

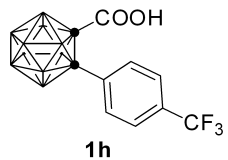

Current Data Parameters  
NAME qyj-H-SM-pCF3-CD2Cl2  
EXPNO 1  
PROCNO 1

F2 - Acquisition Parameters  
Date\_ 20150625  
Time 17.37 h  
INSTRUM spect  
PROBHD Z108618\_0257 (  
PULPROG zg30  
TD 65536  
SOLVENT CD2Cl2  
NS 8  
DS 2  
SWH 8012.820 Hz  
FIDRES 0.122266 Hz  
AQ 4.0894465 sec  
RG 144  
DW 62.400 usec  
DE 6.50 usec  
TE 295.4 K  
D1 1.00000000 sec  
TD0 1  
SFO1 400.2324714 MHz  
NUC1 1H  
P1 12.80 usec  
PLW1 13.56000042 W

F2 - Processing parameters  
SI 65536  
SF 400.2300155 MHz  
WDW EM  
SSB 0  
LB 0.30 Hz  
GB 0  
PC 1.00

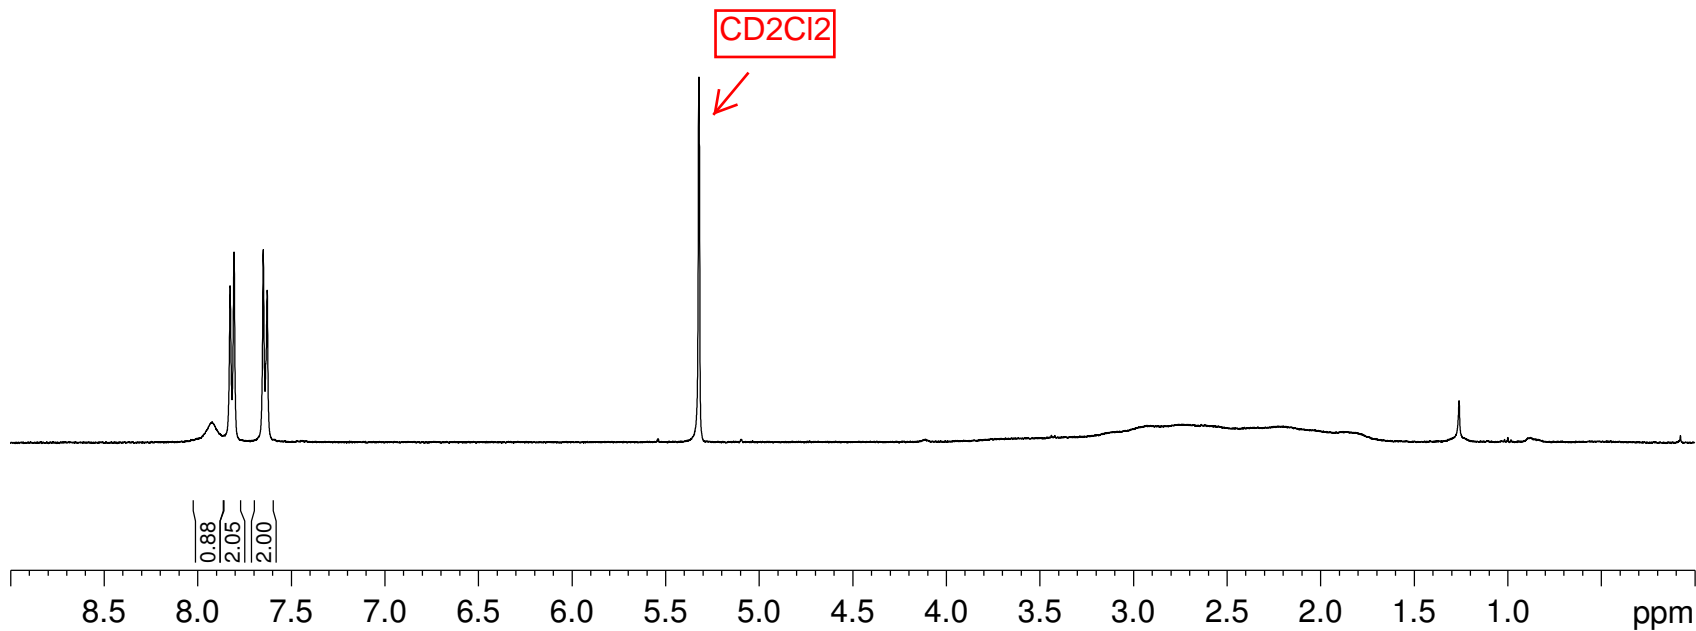

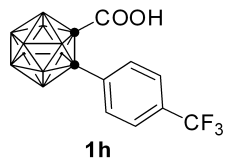

159.49

134.73  
133.06  
132.72  
131.92  
126.09  
126.05  
126.02  
125.97  
125.28  
122.58

82.22

75.88

54.37  
54.10  
53.83  
53.56  
53.29

CD2Cl2

qyj-C-SM-pCF3-CD2Cl2

Current Data Parameters  
NAME qyj-C-SM-pCF3-CD2Cl2  
EXPNO 1  
PROCNO 1

F2 - Acquisition Parameters  
Date\_ 20150628  
Time 13.39 h  
INSTRUM spect  
PROBHD Z108618\_0257 (  
PULPROG zgpg30  
TD 65536  
SOLVENT CD2Cl2  
NS 5143  
DS 4  
SWH 29761.904 Hz  
FIDRES 0.454131 Hz  
AQ 1.1010048 sec  
RG 128  
DW 16.800 usec  
DE 6.50 usec  
TE 295.6 K  
D1 2.00000000 sec  
D11 0.03000000 sec  
TD0 1  
SFO1 100.6479773 MHz  
NUC1 13C  
P1 9.50 usec  
PLW1 55.34000015 W  
SFO2 400.2316009 MHz  
NUC2 1H  
CPDPRG[2] waltz16  
PCPD2 90.00 usec  
PLW2 13.56000042 W  
PLW12 0.27428001 W  
PLW13 0.13796000 W

F2 - Processing parameters  
SI 32768  
SF 100.6378733 MHz  
WDW EM  
SSB 0  
LB 1.00 Hz  
GB 0  
PC 1.40

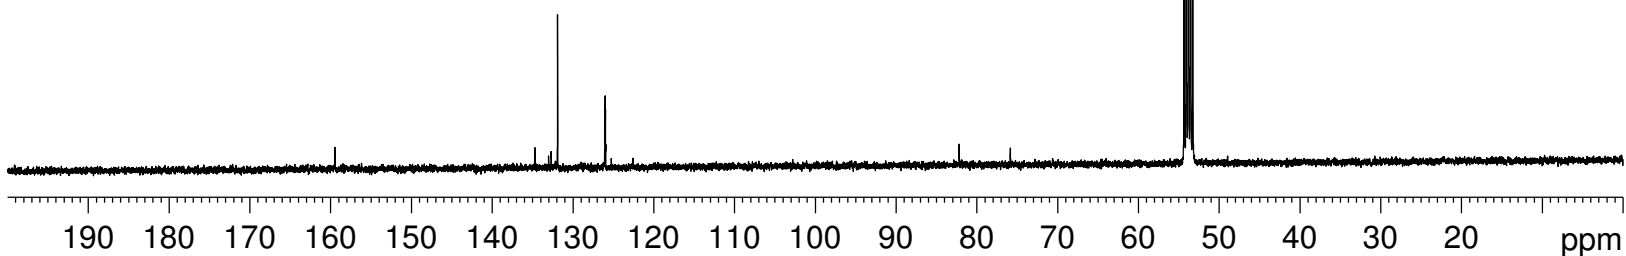

qyj-B-SM-pCF3-CD2C12

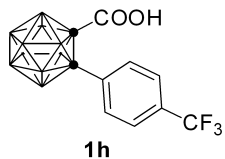

— 0.92

— 1.74

— 8.11

— 9.09

— 9.85

Current Data Parameters  
NAME qyj-B-SM-pCF3-CD2C12  
EXPNO 1  
PROCNO 1

F2 - Acquisition Parameters  
Date\_ 20150625  
Time 17.27 h  
INSTRUM spect  
PROBHD Z108618\_0257 (  
PULPROG zgpg30  
TD 65536  
SOLVENT DMSO  
NS 78  
DS 4  
SWH 29761.904 Hz  
FIDRES 0.454131 Hz  
AQ 1.1010048 sec  
RG 456  
DW 16.800 usec  
DE 6.50 usec  
TE 295.8 K  
D1 2.00000000 sec  
D11 0.03000000 sec  
TD0 1  
SFO1 128.4096890 MHz  
NUC1 11B  
P1 7.50 usec  
PLW1 55.09999847 W  
SFO2 400.2316008 MHz  
NUC2 1H  
CPDPRG[2] waltz16  
PCPD2 90.00 usec  
PLW2 13.56000042 W  
PLW12 0.27428001 W  
PLW13 0.13796000 W

F2 - Processing parameters  
SI 32768  
SF 128.4095347 MHz  
WDW EM  
SSB 0  
LB 1.00 Hz  
GB 0  
PC 1.40

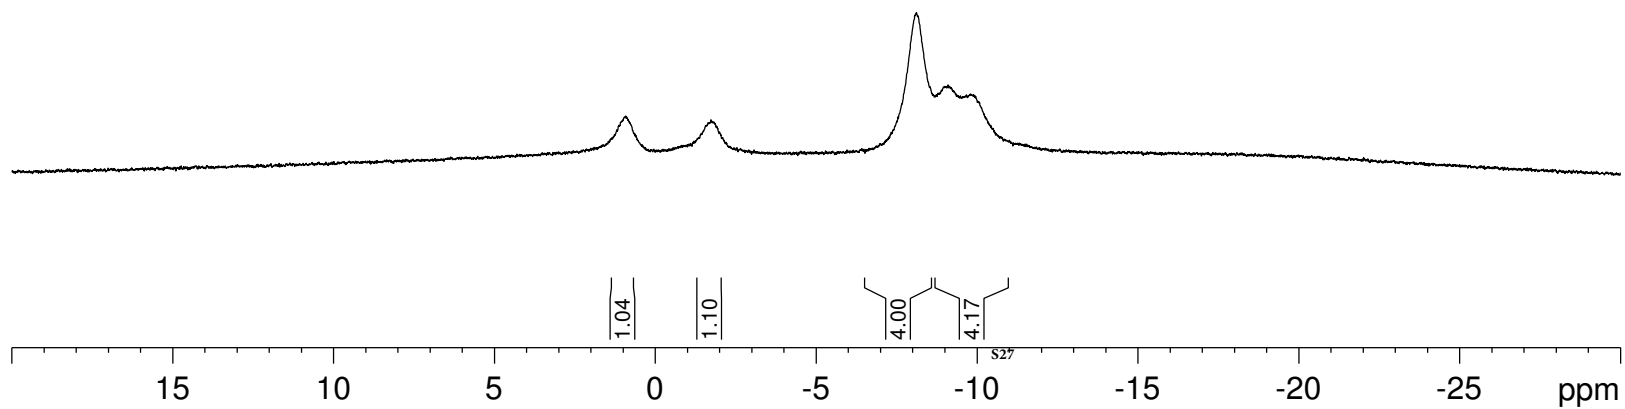

0.28  
-0.79  
-2.24  
-3.52  
-8.66  
-9.90  
-10.84  
-11.70

qyj-B-SM-pCF3-CD2Cl2 (C)

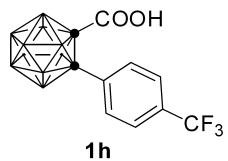

Current Data Parameters  
NAME qyj-B-SM-pCF3-CD2Cl2 (C)  
EXPNO 1  
PROCNO 1

F2 - Acquisition Parameters

Date\_ 20150625  
Time 17.32 h  
INSTRUM spect  
PROBHD Z108618\_0257 ( )  
PULPROG zg  
TD 65536  
SOLVENT DMSO  
NS 44  
DS 4  
SWH 25510.203 Hz  
FIDRES 0.389255 Hz  
AQ 1.2845056 sec  
RG 456  
DW 19.600 usec  
DE 6.50 usec  
TE 295.5 K  
D1 1.00000000 sec  
TD0 1  
SFO1 128.4096891 MHz  
NUC1 11B  
P1 7.50 usec  
PLW1 55.09999847 W

F2 - Processing parameters

SI 32768  
SF 128.4096891 MHz  
WDW EM  
SSB 0  
LB 1.00 Hz  
GB 0  
PC 1.40

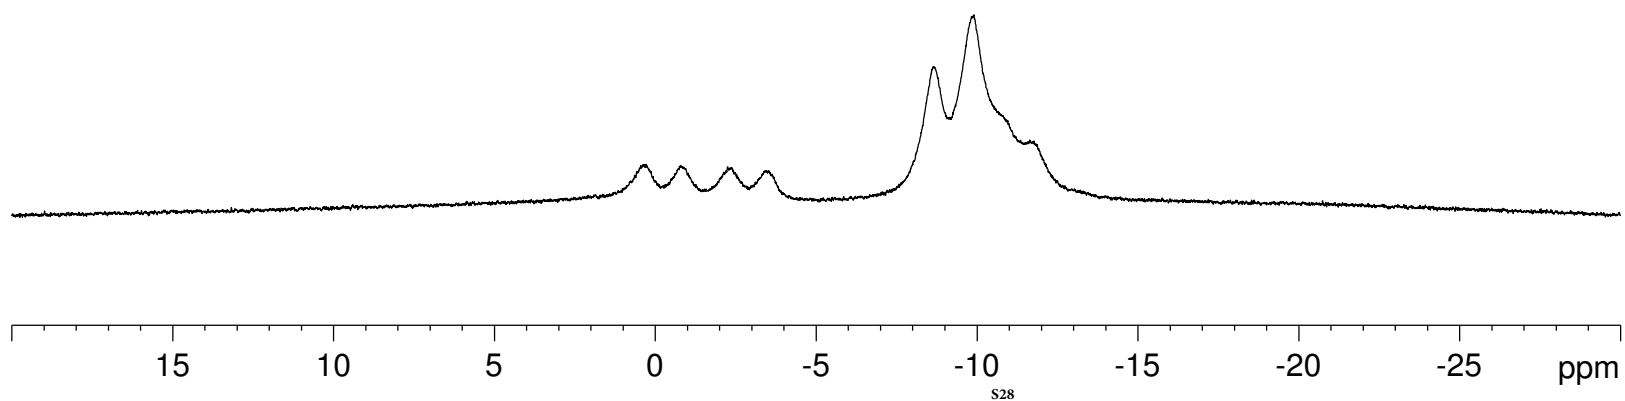

8.226  
 7.586  
 7.564  
 6.852  
 6.830  
 5.320  
 3.809

qyj-H-pOMe-CD2Cl2

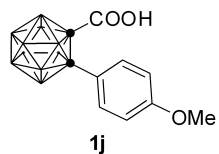

Current Data Parameters  
 NAME qyj-H-pOMe-CD2Cl2  
 EXPNO 1  
 PROCNO 1

F2 - Acquisition Parameters  
 Date\_ 20150624  
 Time 12.26 h  
 INSTRUM spect  
 PROBHD Z108618\_0257 (  
 PULPROG zg30  
 TD 65536  
 SOLVENT CD2Cl2  
 NS 8  
 DS 2  
 SWH 8012.820 Hz  
 FIDRES 0.122266 Hz  
 AQ 4.0894465 sec  
 RG 144  
 DW 62.400 usec  
 DE 6.50 usec  
 TE 295.3 K  
 D1 1.00000000 sec  
 TD0 1  
 SFO1 400.2324714 MHz  
 NUC1 1H  
 P1 12.80 usec  
 PLW1 13.56000042 W

F2 - Processing parameters  
 SI 65536  
 SF 400.2300162 MHz  
 WDW EM  
 SSB 0  
 LB 0.30 Hz  
 GB 0  
 PC 1.00

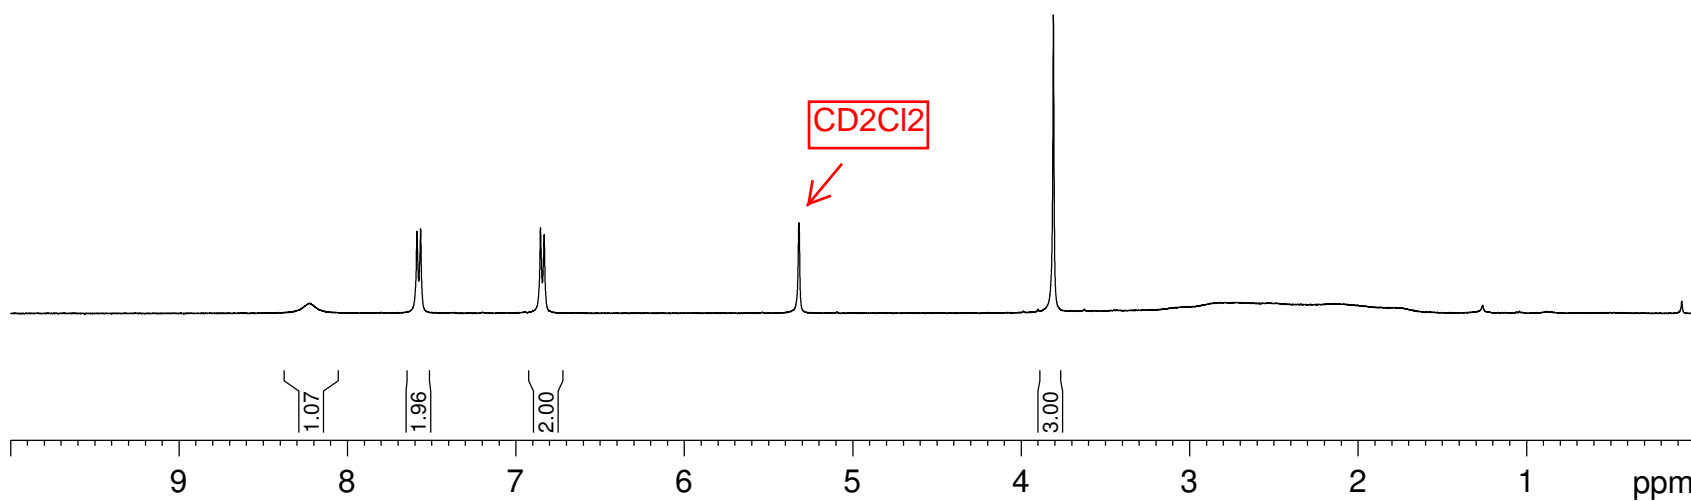

161.979  
160.065

132.827

122.999

114.244

85.037

76.270

55.892  
54.380  
54.109  
53.839  
53.569  
53.298

qyj-C-pOMe-CDCl3

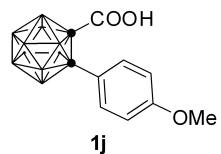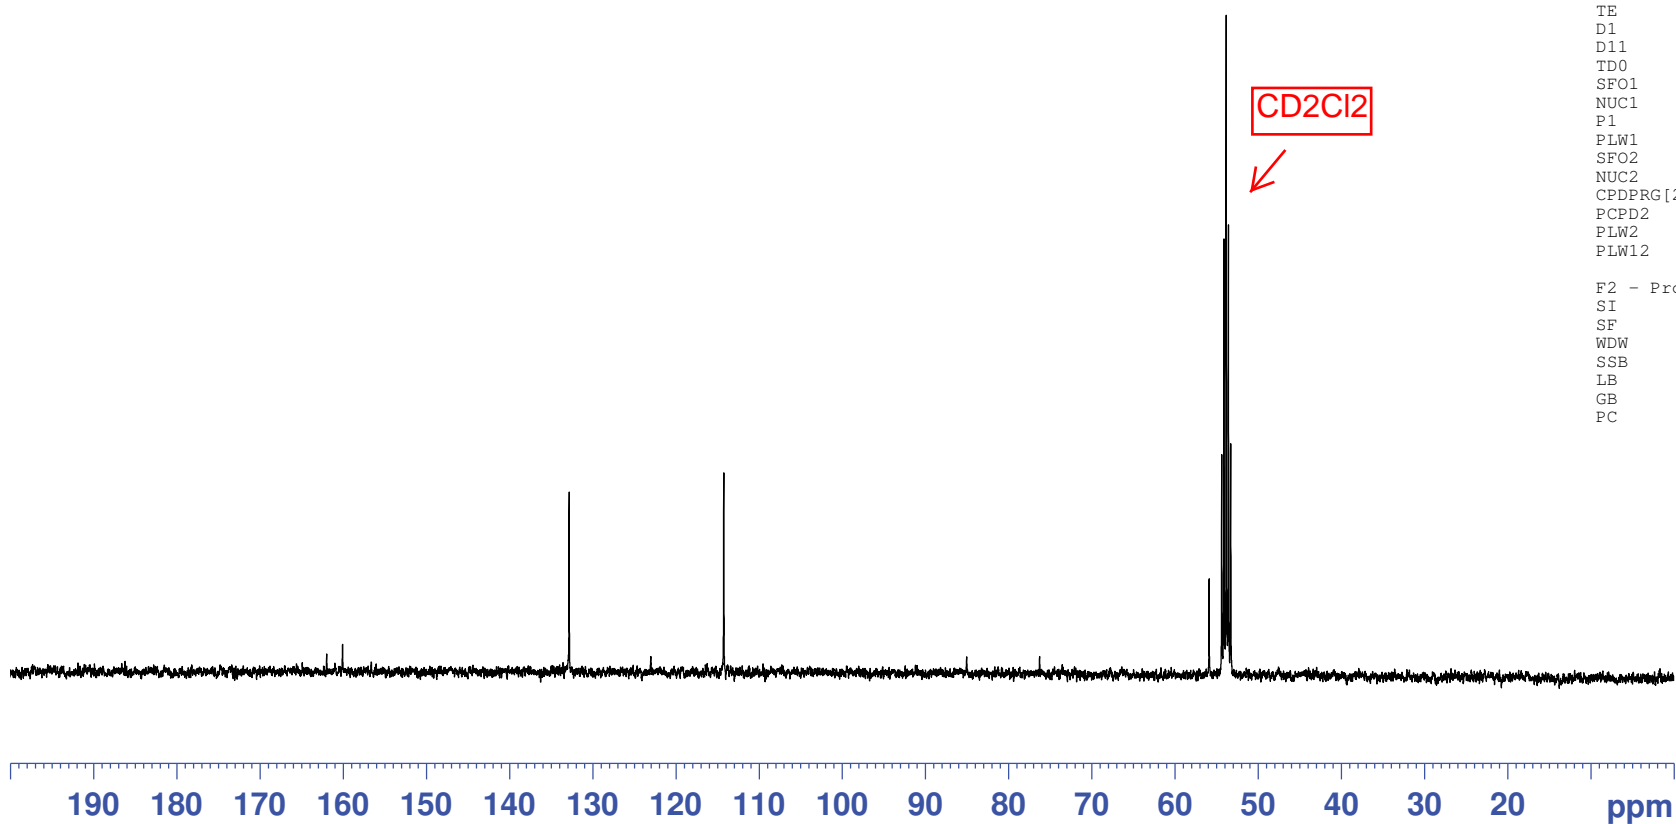

Current Data Parameters  
NAME qyj-C-pOMe-CDCl3  
EXPNO 1  
PROCNO 1

F2 - Acquisition Parameters  
Date\_ 20150624  
Time 19.33 h  
INSTRUM spect  
PROBHD Z824601\_0021 (  
PULPROG zgdc  
TD 131072  
SOLVENT CD2Cl2  
NS 1360  
DS 0  
SWH 25252.525 Hz  
FIDRES 0.192661 Hz  
AQ 2.5952256 sec  
RG 203  
DW 19.800 usec  
DE 6.50 usec  
TE 295.1 K  
D1 1.00000000 sec  
D11 0.03000000 sec  
TD0 1  
SFO1 100.6227690 MHz  
NUC1 13C  
P1 9.50 usec  
PLW1 41.25000000 W  
SFO2 400.1320007 MHz  
NUC2 1H  
CPDPRG[2] waltz16  
PCPD2 90.00 usec  
PLW2 8.31000042 W  
PLW12 0.23083000 W

F2 - Processing parameters  
SI 131072  
SF 100.6127265 MHz  
WDW EM  
SSB 0  
LB 3.00 Hz  
GB 0  
PC 1.40

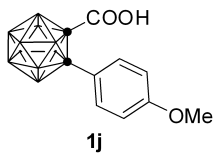

0.82  
-2.66  
-8.63

qyj-B-pOMe-CDCl3

Current Data Parameters  
 NAME qyj-B-pOMe-CDCl3  
 EXPNO 1  
 PROCNO 1

F2 - Acquisition Parameters  
 Date\_ 20150624  
 Time 12.50 h  
 INSTRUM spect  
 PROBHD Z108618\_0257 (  
 PULPROG zgpg30  
 TD 65536  
 SOLVENT CD2Cl2  
 NS 64  
 DS 4  
 SWH 29761.904 Hz  
 FIDRES 0.454131 Hz  
 AQ 1.1010048 sec  
 RG 575  
 DW 16.800 usec  
 DE 6.50 usec  
 TE 295.6 K  
 D1 2.00000000 sec  
 D11 0.03000000 sec  
 TD0 1  
 SFO1 128.4096890 MHz  
 NUC1 11B  
 P1 7.50 usec  
 PLW1 55.09999847 W  
 SFO2 400.2316008 MHz  
 NUC2 1H  
 CPDPRG[2] waltz16  
 PCPD2 90.00 usec  
 PLW2 13.56000042 W  
 PLW12 0.27428001 W  
 PLW13 0.13796000 W

F2 - Processing parameters  
 SI 32768  
 SF 128.4095347 MHz  
 WDW EM  
 SSB 0  
 LB 1.00 Hz  
 GB 0  
 PC 1.40

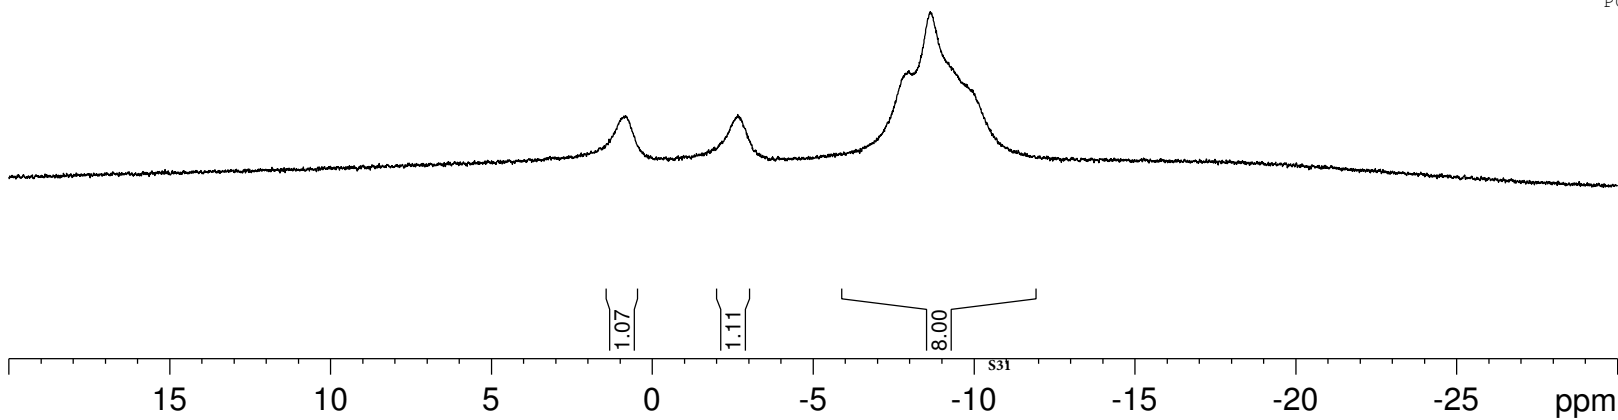

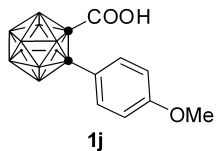

0.29  
-0.89  
-3.28  
-4.46  
-8.34  
-9.34  
-10.35  
-11.84

qyj-B-pOMe-CDCl3 (C)

Current Data Parameters  
 NAME qyj-B-pOMe-CDCl3 (C)  
 EXPNO 1  
 PROCNO 1

F2 - Acquisition Parameters  
 Date\_ 20150624  
 Time 12.54 h  
 INSTRUM spect  
 PROBHD Z108618\_0257 (  
 PULPROG zg  
 TD 65536  
 SOLVENT CD2Cl2  
 NS 32  
 DS 4  
 SWH 25510.203 Hz  
 FIDRES 0.389255 Hz  
 AQ 1.2845056 sec  
 RG 322  
 DW 19.600 usec  
 DE 6.50 usec  
 TE 295.4 K  
 D1 1.00000000 sec  
 TD0 1  
 SFO1 128.4096891 MHz  
 NUC1 11B  
 P1 7.50 usec  
 PLW1 55.09999847 W

F2 - Processing parameters  
 SI 32768  
 SF 128.4096891 MHz  
 WDW EM  
 SSB 0  
 LB 1.00 Hz  
 GB 0  
 PC 1.40

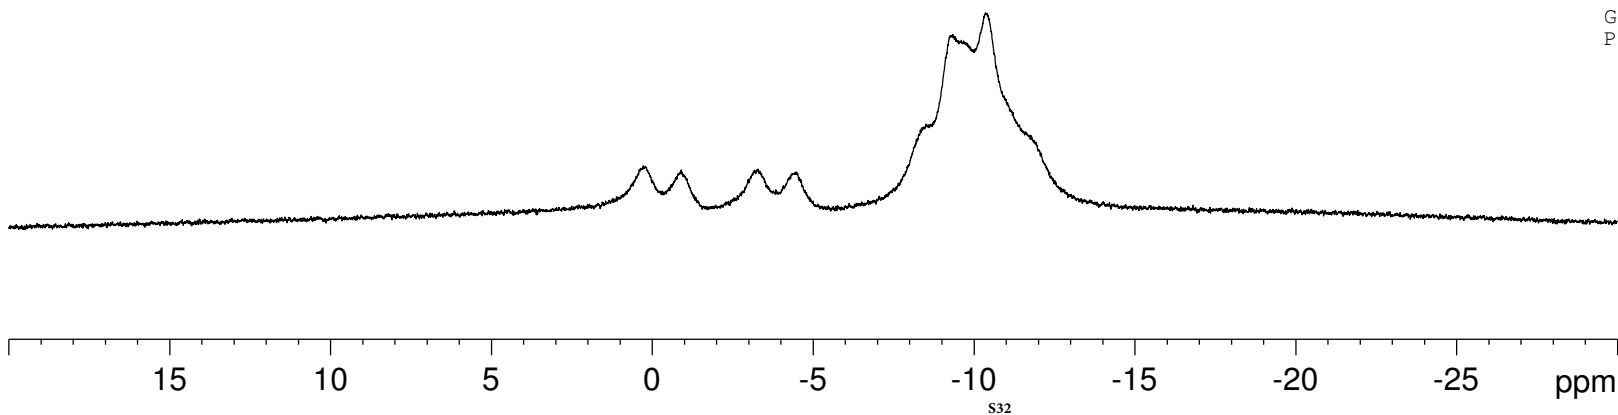



8.975  
8.954  
8.203  
8.185  
7.982  
7.963  
7.929  
7.910  
7.643  
7.623  
7.572  
7.554  
7.437  
7.419

6.250  
5.320

qyj-H-Nap-CD2Cl2

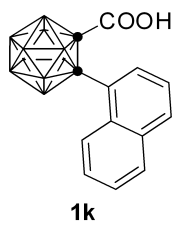

Current Data Parameters  
NAME qyj-H-Nap-CD2Cl2  
EXPNO 1  
PROCNO 1

F2 - Acquisition Parameters  
Date\_ 20150624  
Time 12.34 h  
INSTRUM spect  
PROBHD Z108618\_0257 (  
PULPROG zg30  
TD 65536  
SOLVENT CD2Cl2  
NS 16  
DS 2  
SWH 8012.820 Hz  
FIDRES 0.122266 Hz  
AQ 4.0894465 sec  
RG 144  
DW 62.400 usec  
DE 6.50 usec  
TE 295.3 K  
D1 1.00000000 sec  
TD0 1  
SFO1 400.2324714 MHz  
NUC1 1H  
P1 12.80 usec  
PLW1 13.56000042 W

F2 - Processing parameters  
SI 65536  
SF 400.2300170 MHz  
WDW EM  
SSB 0  
LB 0.30 Hz  
GB 0  
PC 1.00

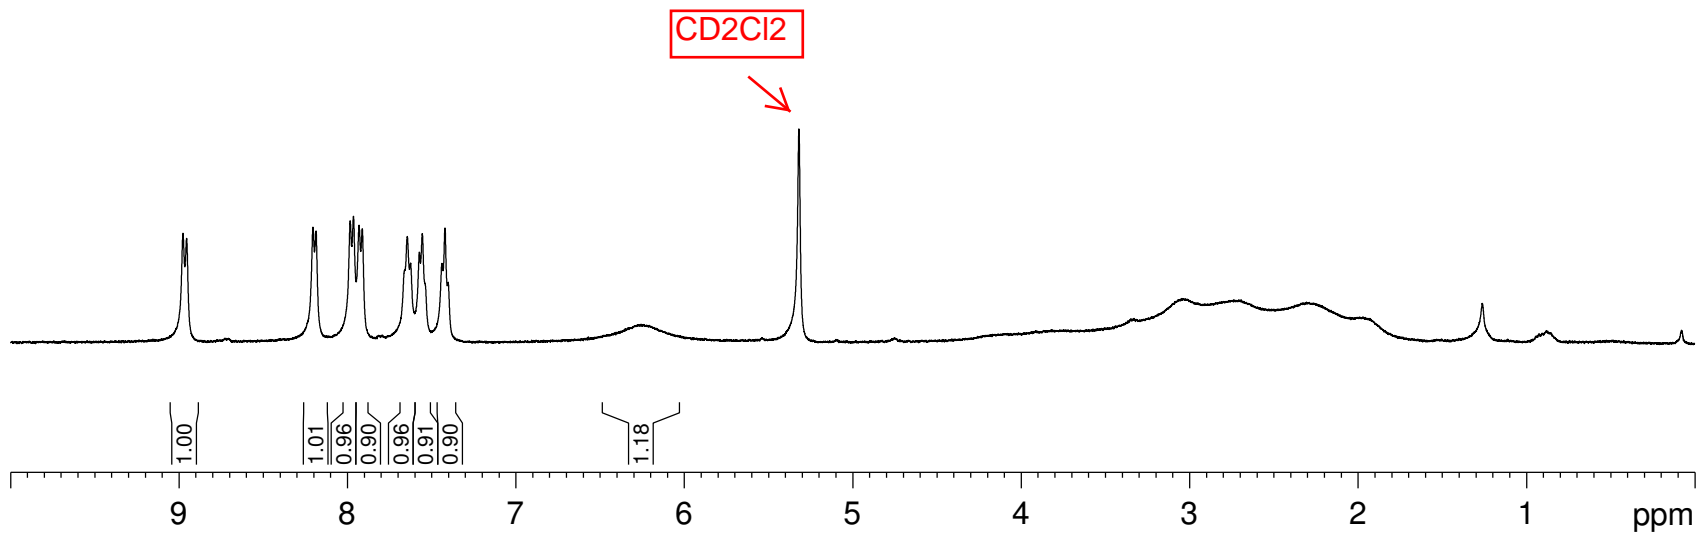

160.164

135.151  
134.557  
133.695  
131.741  
130.107  
127.570  
126.460  
125.850  
125.188  
124.846

86.499

77.821

54.380  
54.110  
53.840  
53.569  
53.299

qyj-C-Nap-CDC13

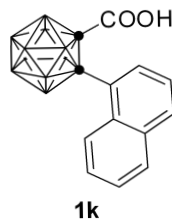

Current Data Parameters  
NAME qyj-C-Nap-CDC13  
EXPNO 1  
PROCNO 1

F2 - Acquisition Parameters  
Date\_ 20150625  
Time 11.56 h  
INSTRUM spect  
PROBHD Z824601\_0021 (  
PULPROG zgdc  
TD 131072  
SOLVENT CD2C12  
NS 1348  
DS 0  
SWH 25252.525 Hz  
FIDRES 0.192661 Hz  
AQ 2.5952256 sec  
RG 203  
DW 19.800 usec  
DE 6.50 usec  
TE 296.8 K  
D1 1.00000000 sec  
D11 0.03000000 sec  
TD0 1  
SFO1 100.6227690 MHz  
NUC1 13C  
P1 9.50 usec  
PLW1 41.25000000 W  
SFO2 400.1320007 MHz  
NUC2 1H  
CPDPRG[2] waltz16  
PCPD2 90.00 usec  
PLW2 8.31000042 W  
PLW12 0.23083000 W

F2 - Processing parameters  
SI 131072  
SF 100.6127254 MHz  
WDW EM  
SSB 0  
LB 3.00 Hz  
GB 0  
PC 1.40

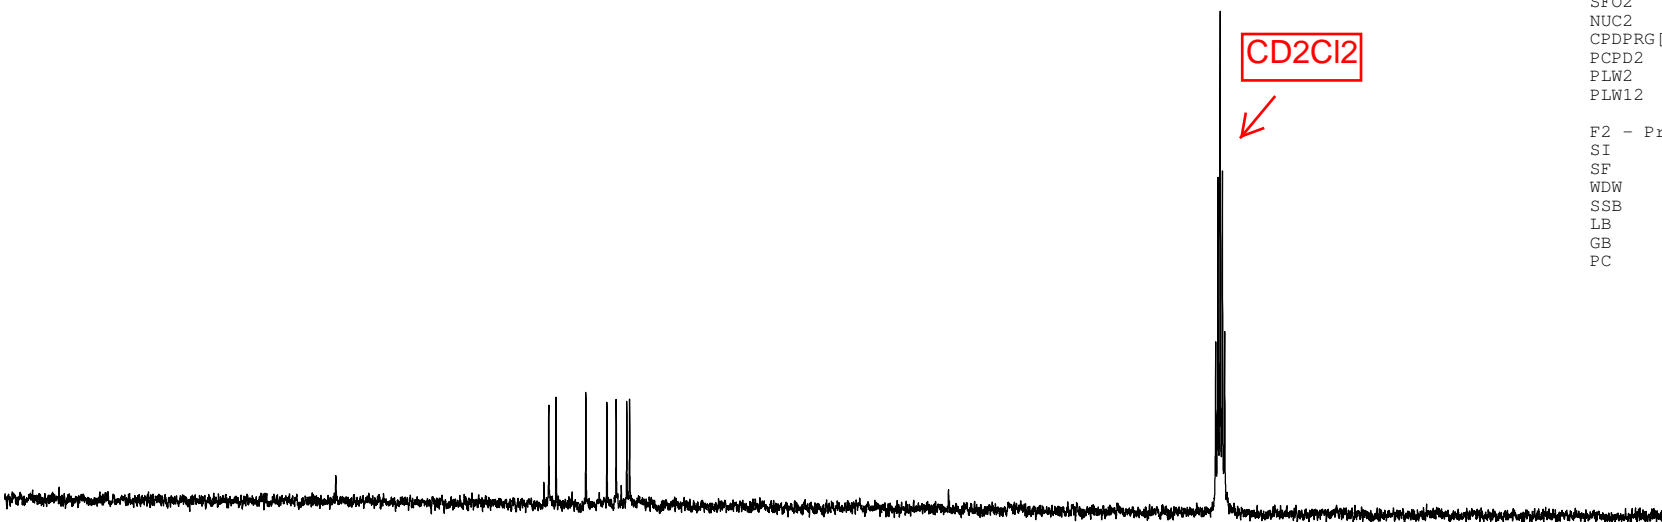

190 180 170 160 150 140 130 120 110 100 90 80 70 60 50 40 30 20 ppm

0.27  
-0.80

-8.03  
-8.90

qyj-B-Nap-CDC13

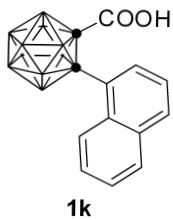

```
Current Data Parameters
NAME      qyj-B-Nap-CDC13
EXPNO     1
PROCNO    1

F2 - Acquisition Parameters
Date_     20150624
Time      12.41 h
INSTRUM   spect
PROBHD    Z108618_0257 (
PULPROG   zgpg30
TD         65536
SOLVENT   CD2C12
NS         100
DS         4
SWH       29761.904 Hz
FIDRES    0.454131 Hz
AQ         1.1010048 sec
RG         1
DW         16.800 usec
DE         6.50 usec
TE         295.6 K
D1         2.00000000 sec
D11        0.03000000 sec
TD0        1
SFO1       128.4096890 MHz
NUC1       11B
P1         7.50 usec
PLW1       55.09999847 W
SFO2       400.2316008 MHz
NUC2       1H
CPDPRG[2] waltz16
PCPD2      90.00 usec
PLW2       13.56000042 W
PLW12      0.27428001 W
PLW13      0.13796000 W

F2 - Processing parameters
SI         32768
SF         128.4095347 MHz
WDW        EM
SSB        0
LB         1.00 Hz
GB         0
PC         1.40
```

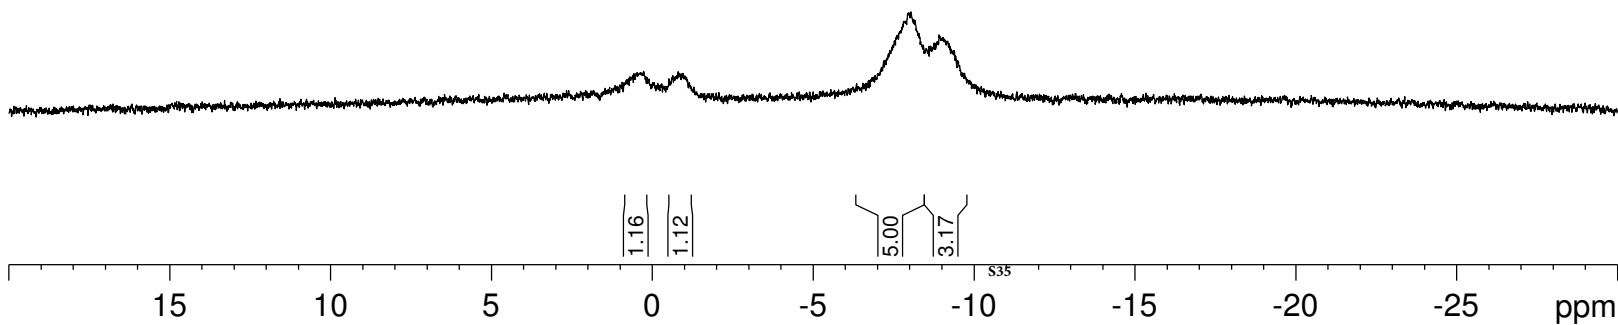

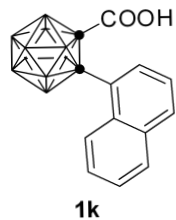

— -0.23  
 — -1.49  
 — -2.65  
  
 — -8.68  
 — -9.75  
 — -10.91

qyj-B-Nap-CDC13 (C)

Current Data Parameters

|        |                     |
|--------|---------------------|
| NAME   | qyj-B-Nap-CDC13 (C) |
| EXPNO  | 1                   |
| PROCNO | 1                   |

F2 - Acquisition Parameters

|         |                 |
|---------|-----------------|
| Date_   | 20150624        |
| Time    | 12.48 h         |
| INSTRUM | spect           |
| PROBHD  | Z108618_0257 (  |
| PULPROG | zg              |
| TD      | 65536           |
| SOLVENT | CD2Cl2          |
| NS      | 37              |
| DS      | 4               |
| SWH     | 25510.203 Hz    |
| FIDRES  | 0.389255 Hz     |
| AQ      | 1.2845056 sec   |
| RG      | 322             |
| DW      | 19.600 usec     |
| DE      | 6.50 usec       |
| TE      | 295.4 K         |
| D1      | 1.00000000 sec  |
| TD0     | 1               |
| SFO1    | 128.4096891 MHz |
| NUC1    | 11B             |
| P1      | 7.50 usec       |
| PLW1    | 55.09999847 W   |

F2 - Processing parameters

|     |                 |
|-----|-----------------|
| SI  | 32768           |
| SF  | 128.4096891 MHz |
| WDW | EM              |
| SSB | 0               |
| LB  | 1.00 Hz         |
| GB  | 0               |
| PC  | 1.40            |

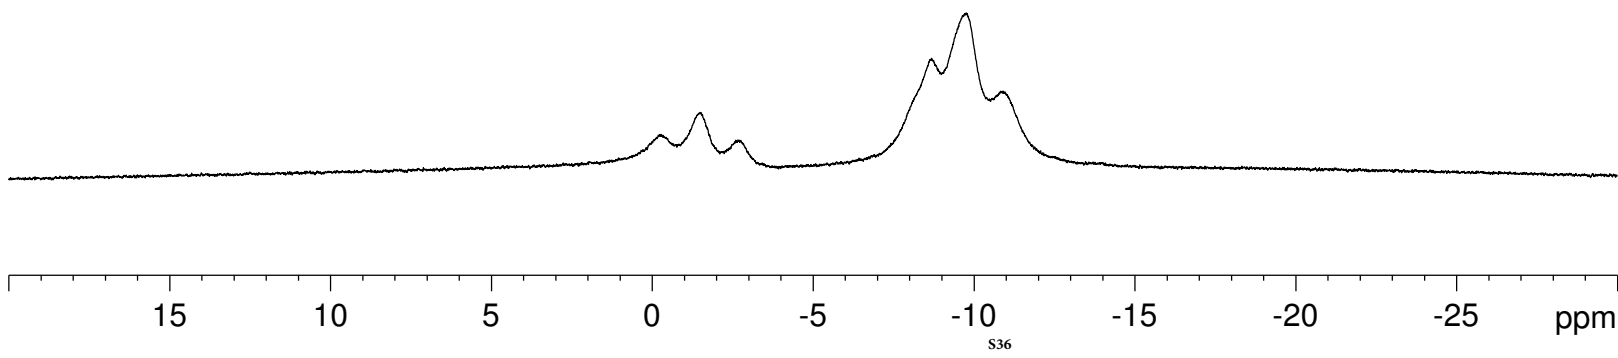

9.240

6.105  
6.087  
6.069

5.322  
5.320  
5.317

2.293  
2.274  
2.255  
2.236  
2.143  
2.124  
2.105  
2.087  
2.068

1.011  
0.993  
0.975  
0.956

qyj-H-bncls-CD2Cl2

Current Data Parameters  
NAME qyj-H-hexene-CD2Cl2  
EXPNO 1  
PROCNO 1

F2 - Acquisition Parameters  
Date\_ 20150625  
Time 13.24 h  
INSTRUM spect  
PROBHD Z824601\_0021 (  
PULPROG zg30  
TD 65536  
SOLVENT CD2Cl2  
NS 8  
DS 2  
SWH 8012.820 Hz  
FIDRES 0.122266 Hz  
AQ 4.0894465 sec  
RG 203  
DW 62.400 usec  
DE 6.50 usec  
TE 297.8 K  
D1 1.00000000 sec  
TD0 1  
SFO1 400.1324708 MHz  
NUC1 1H  
P1 15.00 usec  
PLW1 8.31000042 W

F2 - Processing parameters  
SI 65536  
SF 400.1300155 MHz  
WDB EM  
SSB 0  
LB 0.30 Hz  
GB 0  
PC 1.00

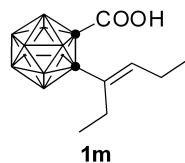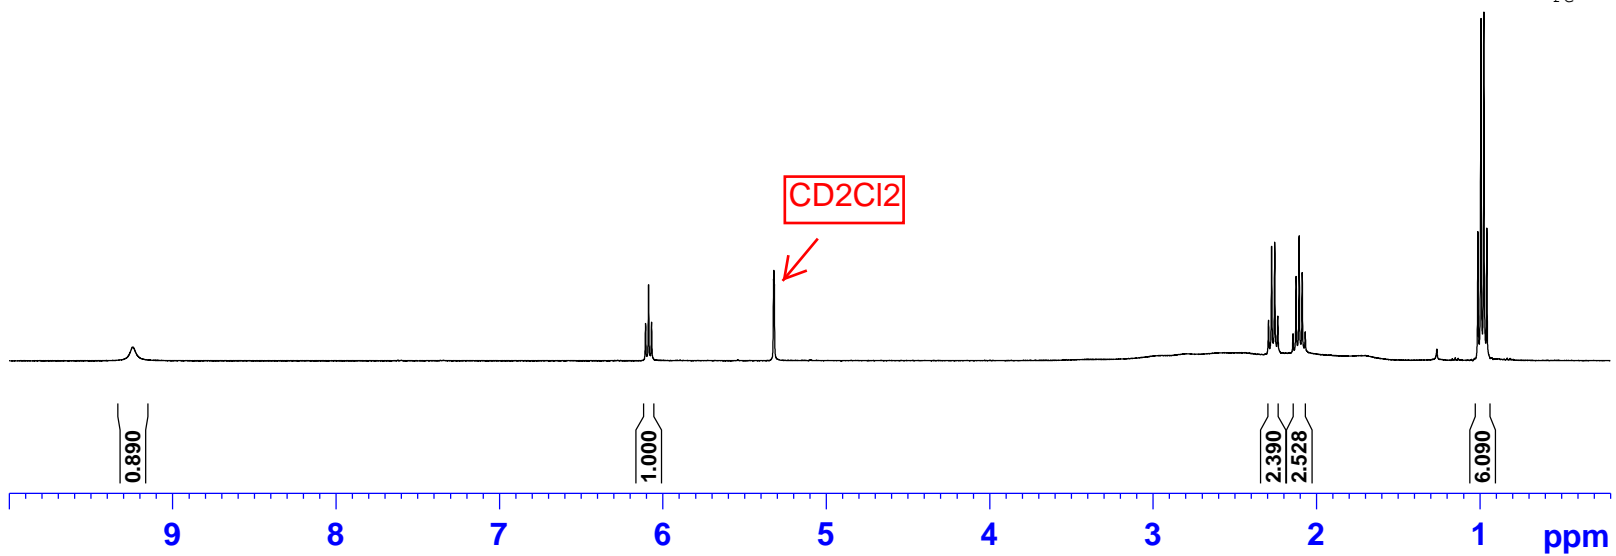

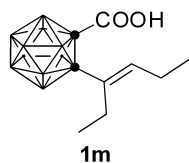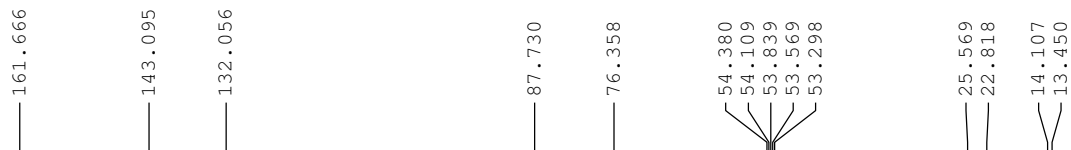

qyj-C-hexene-CD2Cl2

Current Data Parameters  
 NAME qyj-C-hexene-CD2Cl2  
 EXPNO 1  
 PROCNO 1

F2 - Acquisition Parameters  
 Date\_ 20150625  
 Time 13.26 h  
 INSTRUM spect  
 PROBHD Z824601\_0021 (  
 PULPROG zgdc  
 TD 131072  
 SOLVENT CD2Cl2  
 NS 930  
 DS 0  
 SWH 25252.525 Hz  
 FIDRES 0.192661 Hz  
 AQ 2.5952256 sec  
 RG 203  
 DW 19.800 usec  
 DE 6.50 usec  
 TE 297.7 K  
 D1 1.00000000 sec  
 D11 0.03000000 sec  
 TD0 1  
 SFO1 100.6227690 MHz  
 NUC1 13C  
 P1 9.50 usec  
 PLW1 41.25000000 W  
 SFO2 400.1320007 MHz  
 NUC2 1H  
 CPDPRG[2] waltz16  
 PCPD2 90.00 usec  
 PLW2 8.31000042 W  
 PLW12 0.23083000 W

F2 - Processing parameters  
 SI 131072  
 SF 100.6127253 MHz  
 WDW EM  
 SSB 0  
 LB 3.00 Hz  
 GB 0  
 PC 1.40

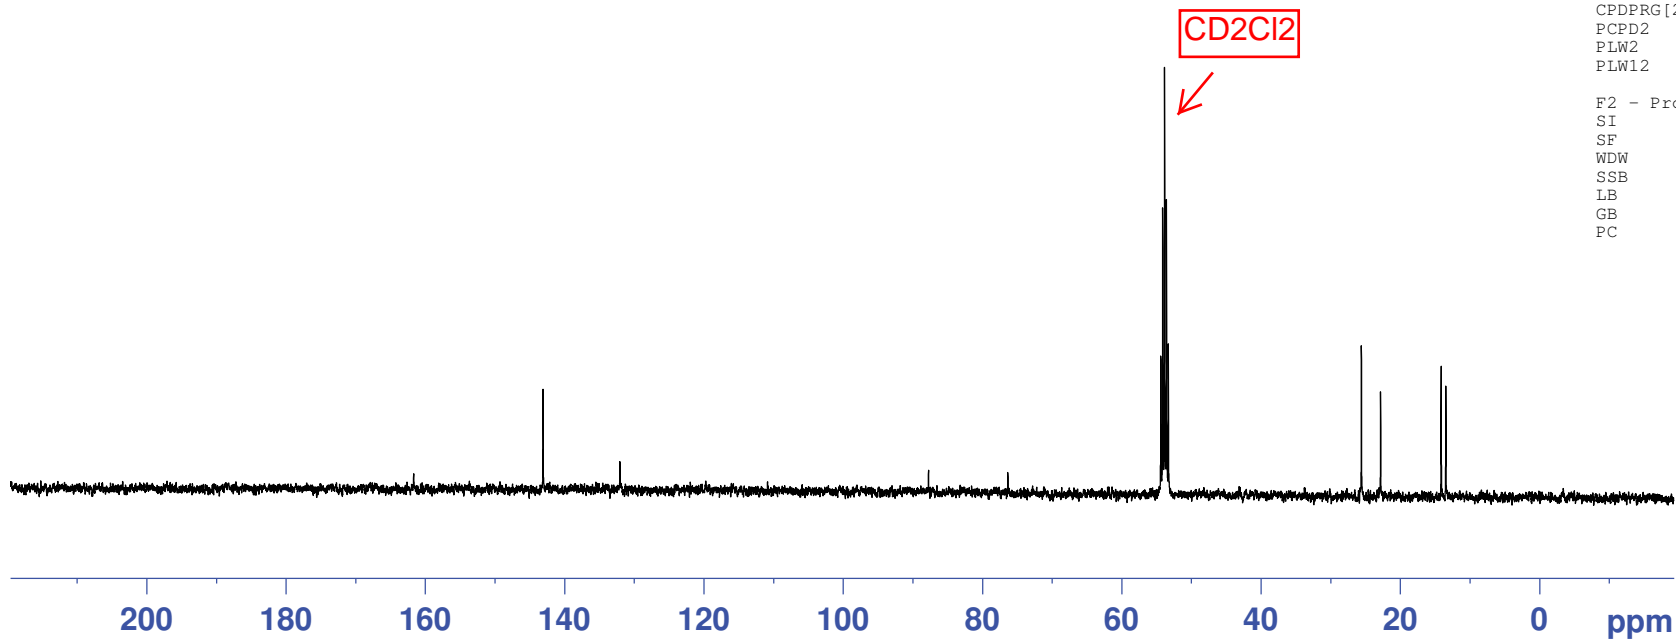

qyj-B-SM-alkene-CD2Cl2

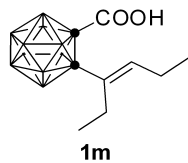

— -0.03  
— -2.89  
— -8.66  
— -9.85

Current Data Parameters  
NAME qyj-B-SM-alkene-CD2Cl2  
EXPNO 1  
PROCNO 1

F2 - Acquisition Parameters

Date\_ 20150625  
Time 17.18 h  
INSTRUM spect  
PROBHD Z108618\_0257 (  
PULPROG zgpg30  
TD 65536  
SOLVENT DMSO  
NS 40  
DS 4  
SWH 29761.904 Hz  
FIDRES 0.454131 Hz  
AQ 1.1010048 sec  
RG 456  
DW 16.800 usec  
DE 6.50 usec  
TE 295.6 K  
D1 2.00000000 sec  
D11 0.03000000 sec  
TD0 1  
SFO1 128.4096890 MHz  
NUC1 11B  
P1 7.50 usec  
PLW1 55.09999847 W  
SFO2 400.2316008 MHz  
NUC2 1H  
CPDPRG[2] waltz16  
PCPD2 90.00 usec  
PLW2 13.56000042 W  
PLW12 0.27428001 W  
PLW13 0.13796000 W

F2 - Processing parameters

SI 32768  
SF 128.4095347 MHz  
WDW EM  
SSB 0  
LB 1.00 Hz  
GB 0  
PC 1.40

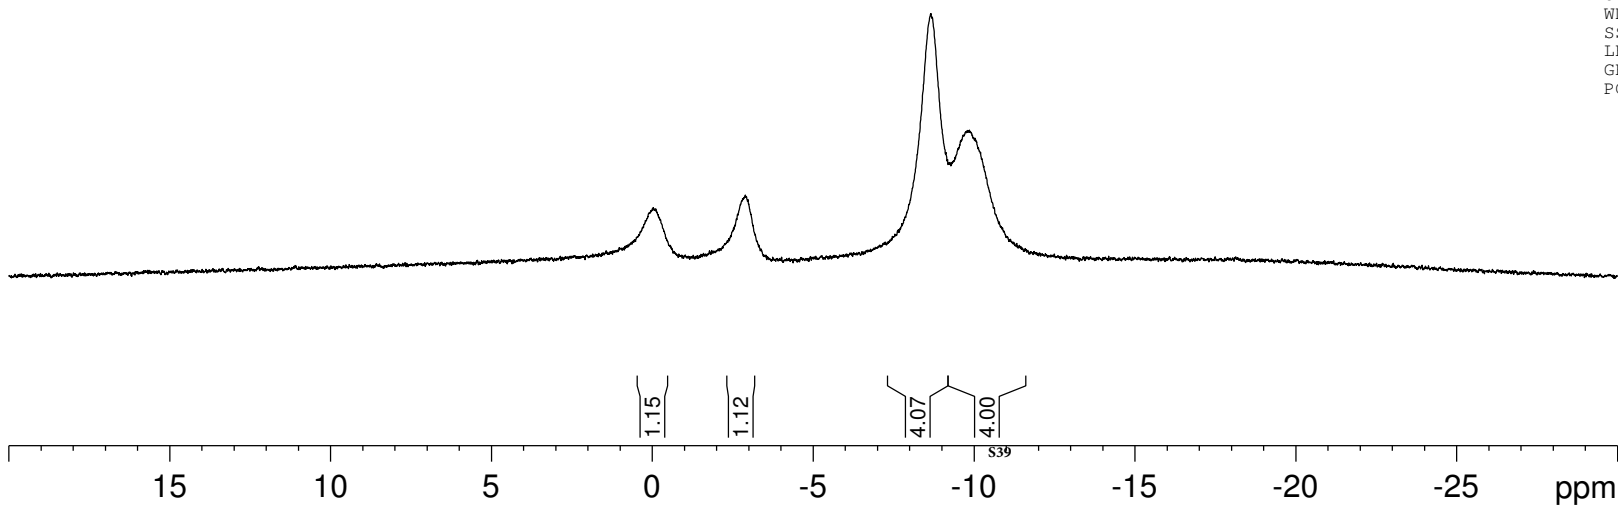

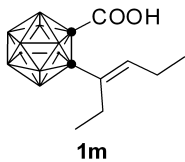

-0.67  
 -1.85  
 -3.48  
 -4.68  
  
 -9.24  
 -10.42  
 -11.55

qyj-B-SM-alkene-CD2Cl2 (C)

Current Data Parameters  
 NAME qyj-B-SM-alkene-CD2Cl2 (C)  
 EXPNO 1  
 PROCNO 1

F2 - Acquisition Parameters  
 Date\_ 20150625  
 Time 17.21 h  
 INSTRUM spect  
 PROBHD Z108618\_0257 (zg)  
 PULPROG zg  
 TD 65536  
 SOLVENT DMSO  
 NS 54  
 DS 4  
 SWH 25510.203 Hz  
 FIDRES 0.389255 Hz  
 AQ 1.2845056 sec  
 RG 406  
 DW 19.600 usec  
 DE 6.50 usec  
 TE 295.5 K  
 D1 1.00000000 sec  
 TD0 1  
 SFO1 128.4096891 MHz  
 NUC1 11B  
 P1 7.50 usec  
 PLW1 55.09999847 W

F2 - Processing parameters  
 SI 32768  
 SF 128.4096891 MHz  
 WDW EM  
 SSB 0  
 LB 1.00 Hz  
 GB 0  
 PC 1.40

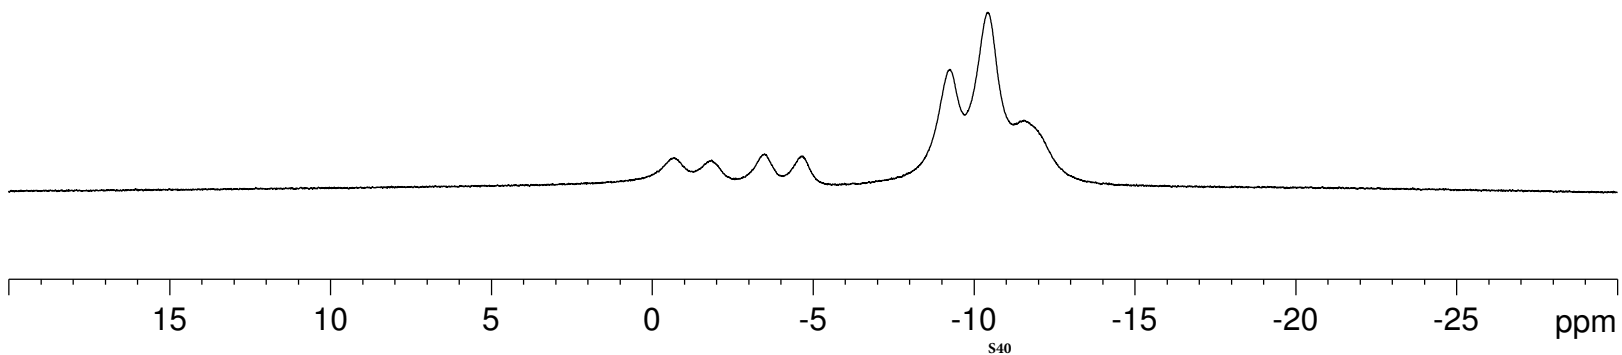



10.091

5.320

2.451  
2.442  
2.432  
2.424  
2.413  
2.405  
2.394  
2.386

1.262  
1.170  
1.151  
1.132  
1.054

qyj-H-6-in-CDCl3

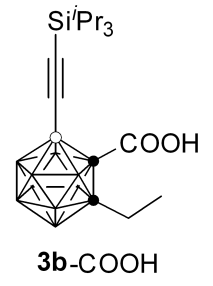

Current Data Parameters  
 NAME qyj-H-6-in-CDCl3  
 EXPNO 1  
 PROCNO 1

F2 - Acquisition Parameters  
 Date\_ 20151002  
 Time 11.14 h  
 INSTRUM spect  
 PROBHD Z108618\_0257 ( )  
 PULPROG zg30  
 TD 65536  
 SOLVENT CDCl3  
 NS 28  
 DS 2  
 SWH 8012.820 Hz  
 FIDRES 0.122266 Hz  
 AQ 4.0894465 sec  
 RG 80.6  
 DW 62.400 usec  
 DE 6.50 usec  
 TE 294.4 K  
 D1 1.00000000 sec  
 TD0 1  
 SFO1 400.2324714 MHz  
 NUC1 1H  
 P1 12.80 usec  
 PLW1 13.56000042 W

F2 - Processing parameters  
 SI 65536  
 SF 400.2307835 MHz  
 WDW EM  
 SSB 0  
 LB 0.30 Hz  
 GB 0  
 PC 1.00

CD2Cl2

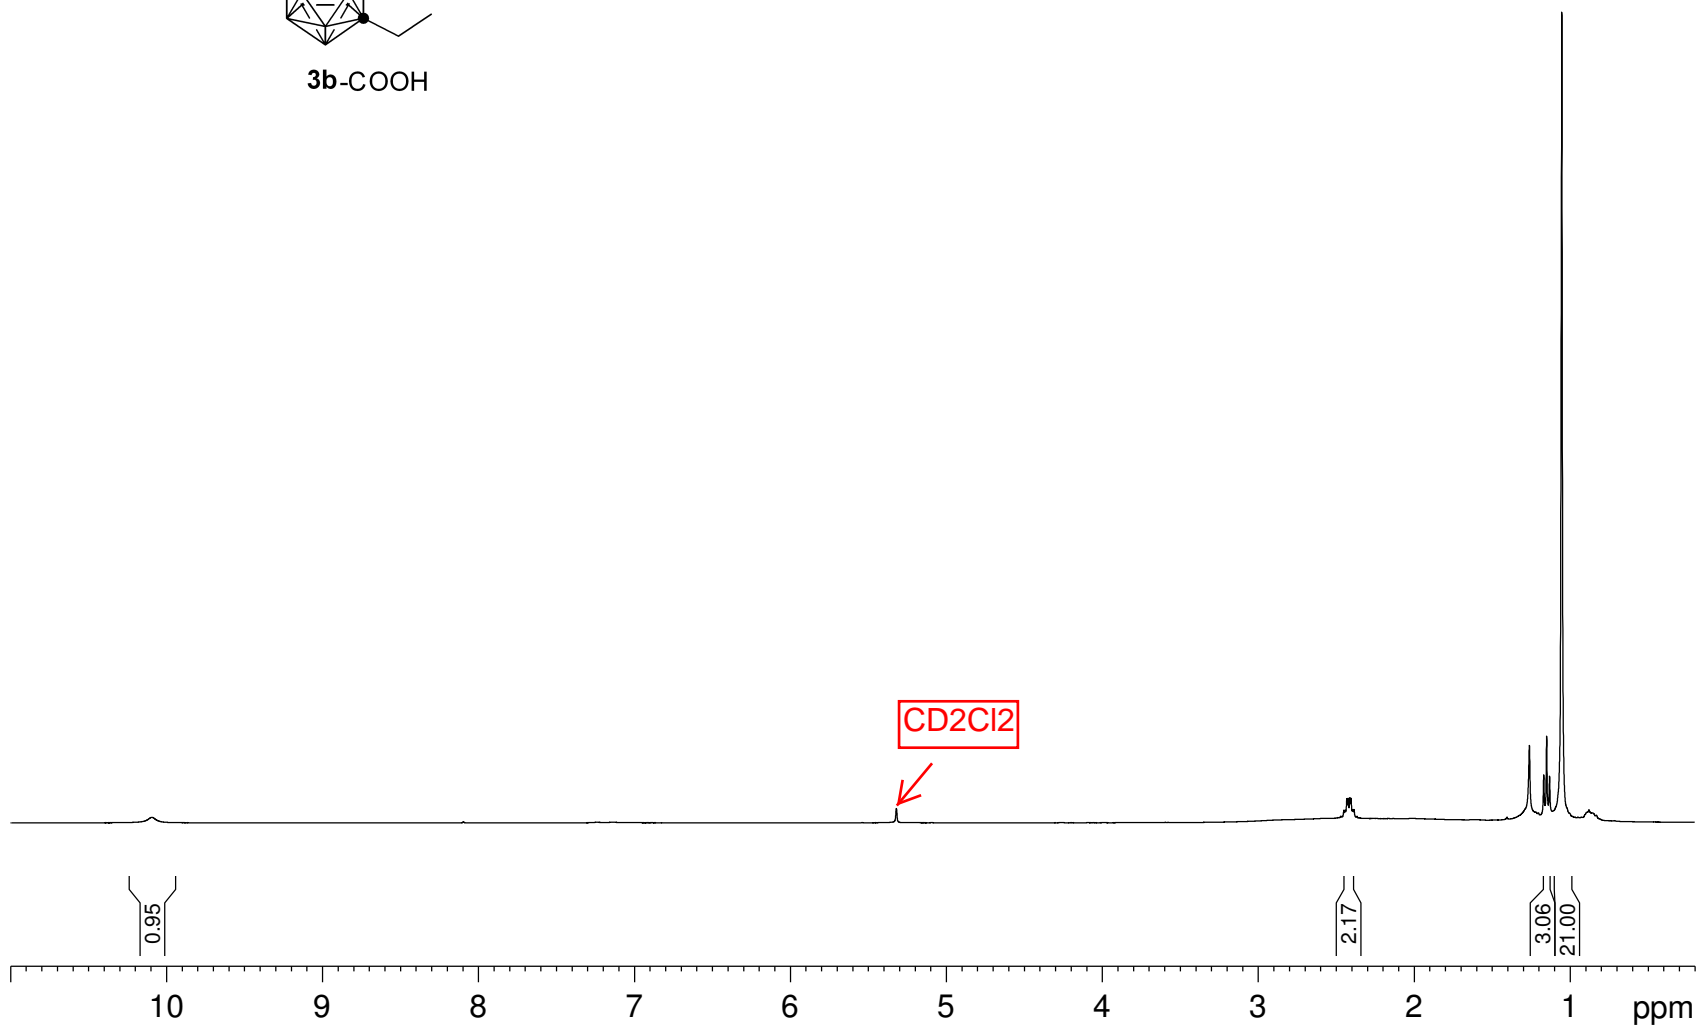

161.36

82.92

74.72

54.38  
54.11  
53.84  
53.57  
53.30

30.50  
30.10

18.70  
14.21  
11.46

qyj-C-6-in-CDC13

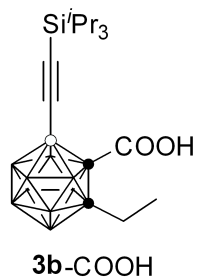

Current Data Parameters  
 NAME qyj-C-6-in-CDC13  
 EXPNO 1  
 PROCNO 1

F2 - Acquisition Parameters  
 Date\_ 20151002  
 Time 12.43 h  
 INSTRUM spect  
 PROBHD Z108618\_0257 (  
 PULPROG zgpg30  
 TD 65536  
 SOLVENT CD2Cl2  
 NS 710  
 DS 4  
 SWH 29761.904 Hz  
 FIDRES 0.454131 Hz  
 AQ 1.1010048 sec  
 RG 181  
 DW 16.800 usec  
 DE 6.50 usec  
 TE 294.5 K  
 D1 2.0000000 sec  
 D11 0.0300000 sec  
 TD0 1  
 SFO1 100.6479773 MHz  
 NUC1 13C  
 P1 9.50 usec  
 PLW1 55.3400015 W  
 SFO2 400.2316009 MHz  
 NUC2 1H  
 CPDPRG[2] waltz16  
 PCPD2 90.00 usec  
 PLW2 13.5600042 W  
 PLW12 0.27428001 W  
 PLW13 0.13796000 W

F2 - Processing parameters  
 SI 32768  
 SF 100.6378724 MHz  
 WDW EM  
 SSB 0  
 LB 1.00 Hz  
 GB 0  
 PC 1.40

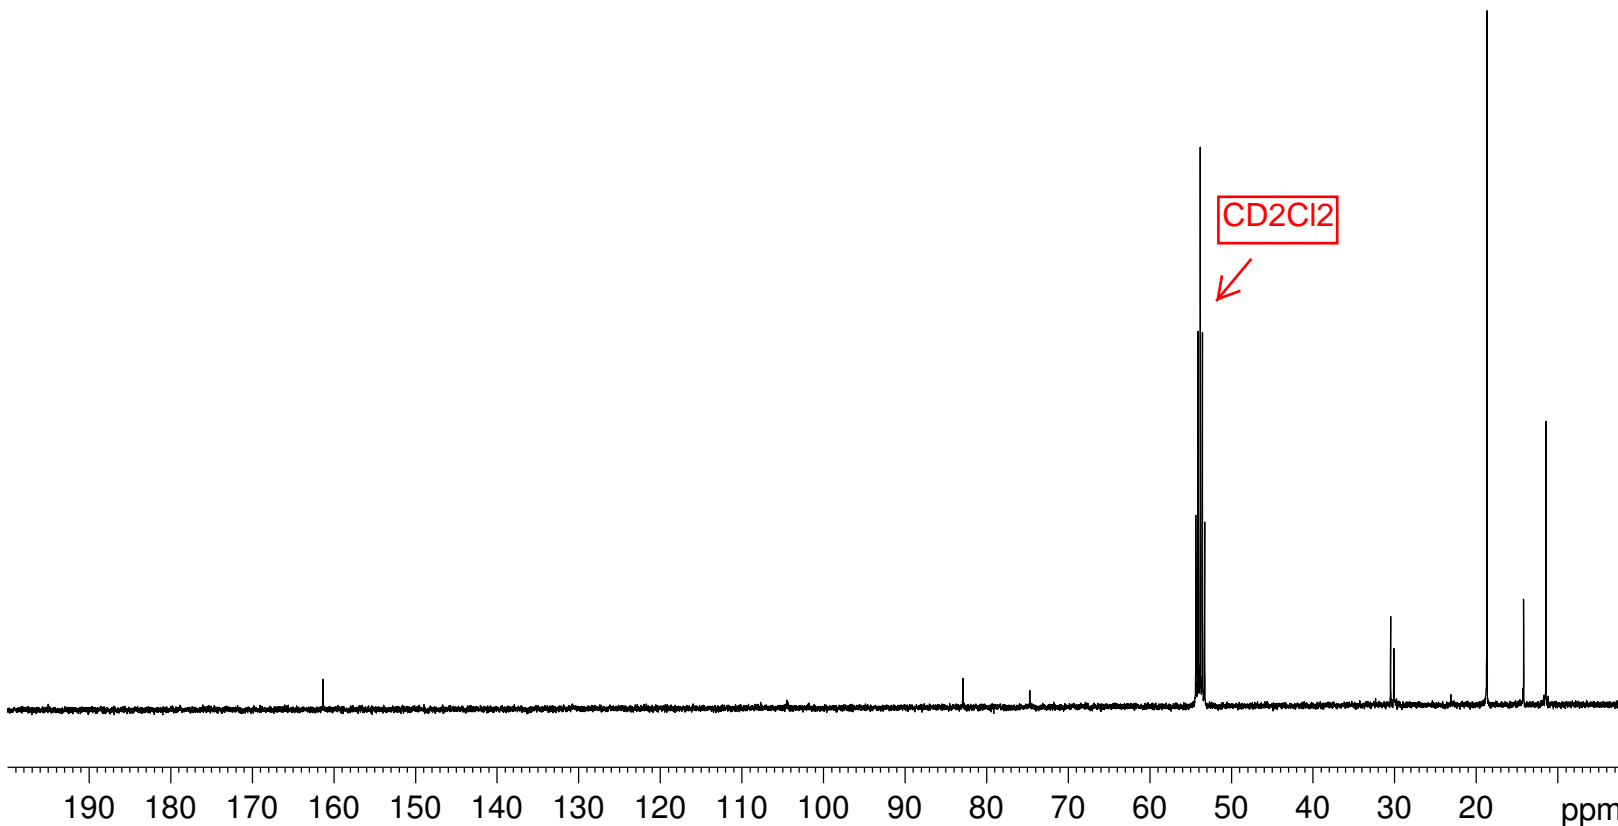

qyj-B-6-in-CDCl3

Current Data Parameters

NAME qyj-B-6-in-CDCl3  
EXPNO 1  
PROCNO 1

F2 - Acquisition Parameters

Date\_ 20151002  
Time 11.05 h  
INSTRUM spect  
PROBHD Z108618\_0257 (  
PULPROG zgpg30  
TD 65536  
SOLVENT CDCl3  
NS 40  
DS 2  
SWH 29761.904 Hz  
FIDRES 0.454131 Hz  
AQ 1.1010048 sec  
RG 512  
DW 16.800 usec  
DE 6.50 usec  
TE 294.5 K  
D1 1.00000000 sec  
D11 0.03000000 sec  
TD0 1  
SFO1 128.4096890 MHz  
NUC1 11B  
P1 7.50 usec  
PLW1 55.09999847 W  
SFO2 400.2316008 MHz  
NUC2 1H  
CPDPRG[2] waltz16  
PCPD2 90.00 usec  
PLW2 13.56000042 W  
PLW12 0.27428001 W  
PLW13 0.13796000 W

F2 - Processing parameters

SI 32768  
SF 128.4095347 MHz  
WDW EM  
SSB 0  
LB 1.00 Hz  
GB 0  
PC 1.40

— -0.38  
— -2.89  
— -9.25  
— -10.61

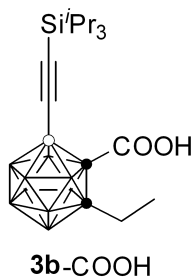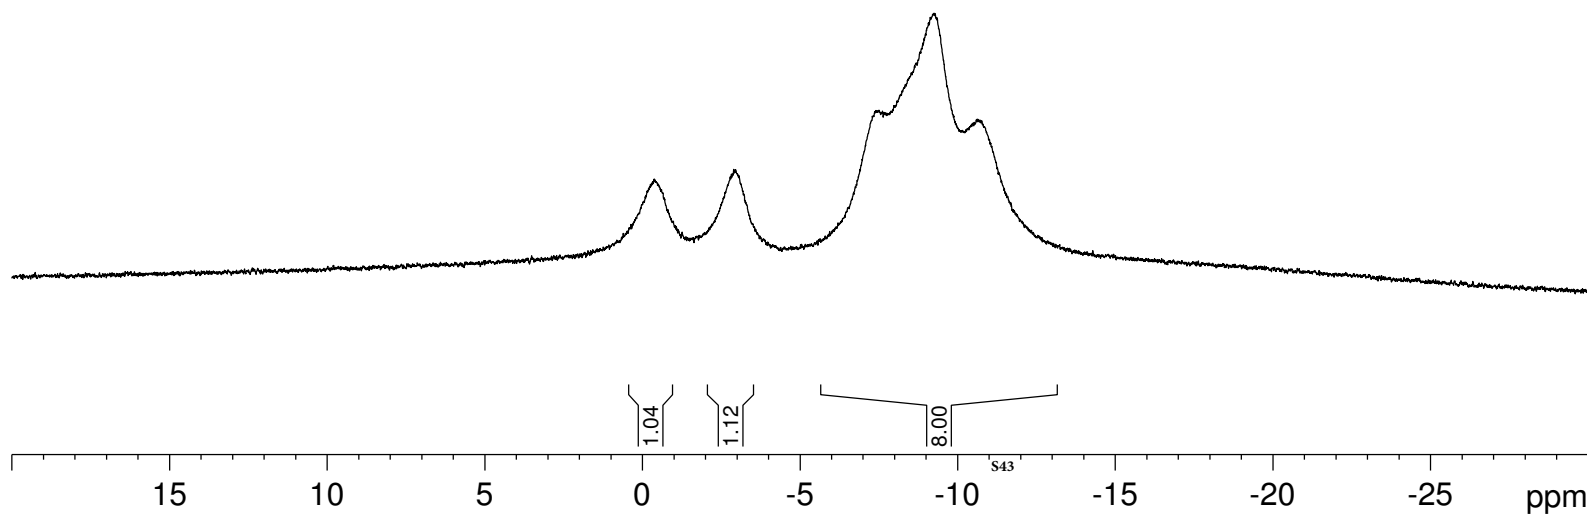

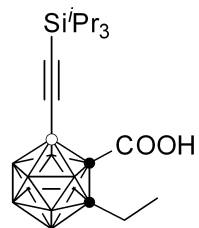

3b-COOH

— 1.13  
 — 2.29  
 — 3.69  
 — 4.83  
  
 — 8.16  
 — 9.25  
 — 10.25  
 — 11.16  
 — 12.66

qyj-B-6-in-CDCl3 (C)

Current Data Parameters  
 NAME qyj-B-6-in-CDCl3 (C)  
 EXPNO 1  
 PROCNO 1

F2 - Acquisition Parameters  
 Date\_ 20151002  
 Time 11.08 h  
 INSTRUM spect  
 PROBHD Z108618\_0257 (  
 PULPROG zg  
 TD 65536  
 SOLVENT CDCl3  
 NS 40  
 DS 2  
 SWH 24038.461 Hz  
 FIDRES 0.366798 Hz  
 AQ 1.3631488 sec  
 RG 362  
 DW 20.800 usec  
 DE 6.50 usec  
 TE 294.4 K  
 D1 2.00000000 sec  
 TD0 1  
 SFO1 128.4096890 MHz  
 NUC1 11B  
 P1 7.50 usec  
 PLW1 55.09999847 W

F2 - Processing parameters  
 SI 32768  
 SF 128.4097117 MHz  
 WDW EM  
 SSB 0  
 LB 1.00 Hz  
 GB 0  
 PC 1.40

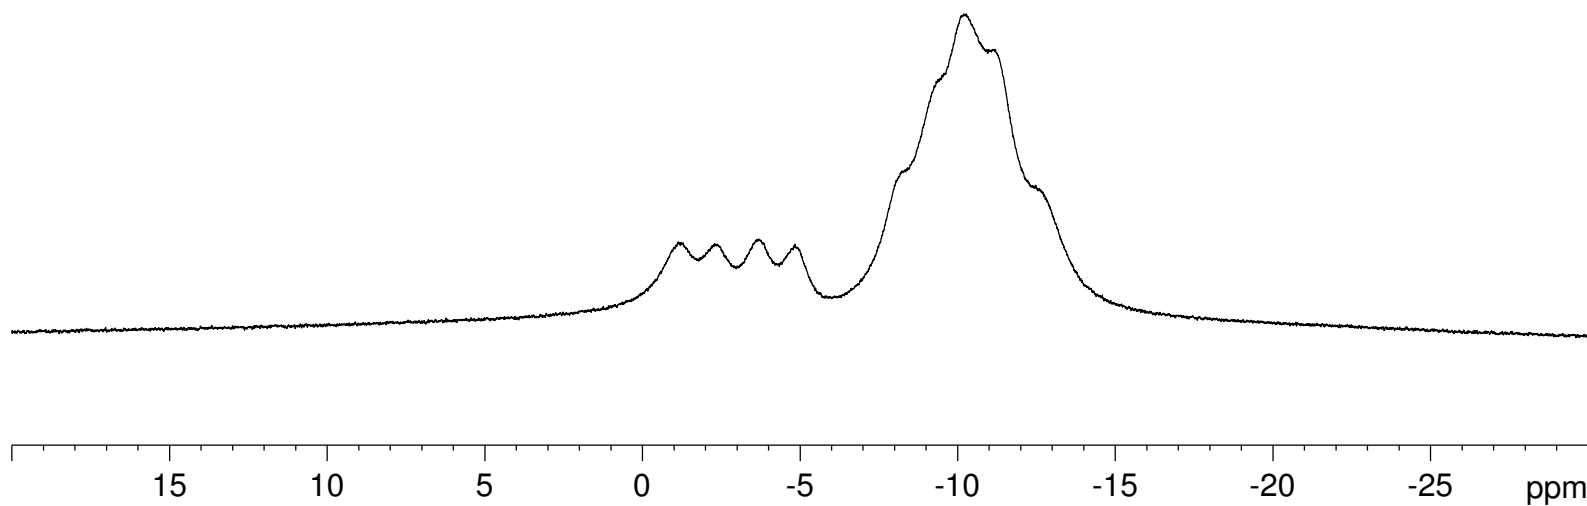

7.260

3.762

2.049

1.069  
1.061

qyj-H-Tips-CDC13

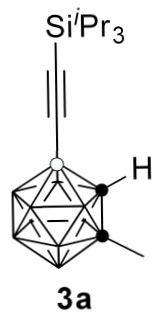

Current Data Parameters  
NAME qyj-H-Tips-CDC13  
EXPNO 1  
PROCNO 1

F2 - Acquisition Parameters  
Date\_ 20150612  
Time 19.17 h  
INSTRUM spect  
PROBHD Z824601\_0021 (  
PULPROG zg30  
TD 65536  
SOLVENT CDC13  
NS 1  
DS 2  
SWH 8012.820 Hz  
FIDRES 0.122266 Hz  
AQ 4.0894465 sec  
RG 80.6  
DW 62.400 usec  
DE 6.50 usec  
TE 295.0 K  
D1 1.00000000 sec  
TD0 1  
SFO1 400.1324708 MHz  
NUC1 1H  
P1 15.00 usec  
PLW1 8.31000042 W

F2 - Processing parameters  
SI 65536  
SF 400.1300098 MHz  
WDW EM  
SSB 0  
LB 0.30 Hz  
GB 0  
PC 1.00

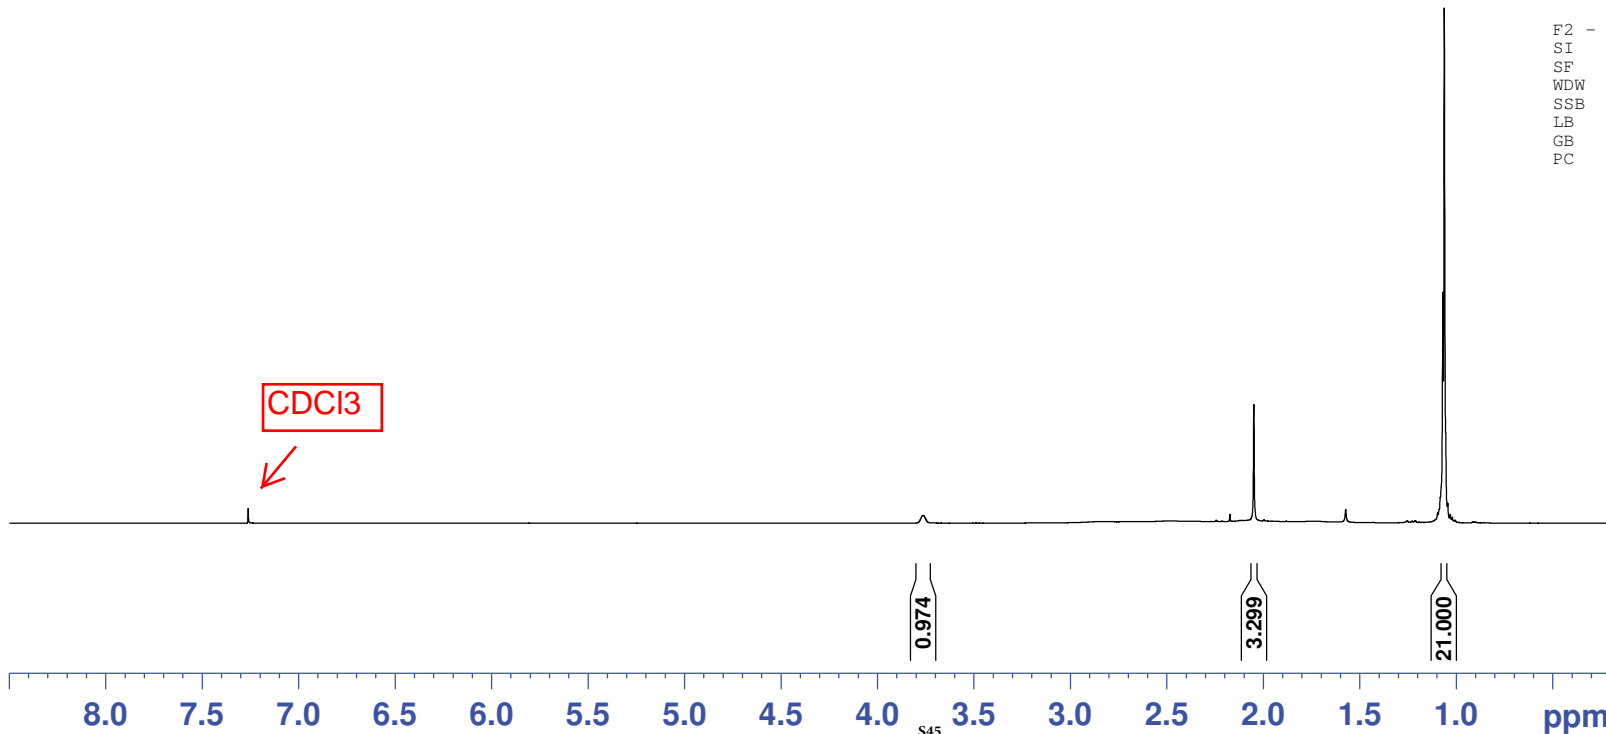

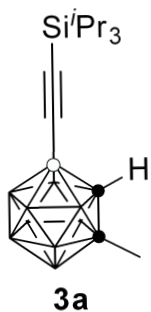

77.473  
77.156  
76.838  
70.219  
63.033

26.023  
18.729  
11.285

qyj-C-Tips-CDC13

Current Data Parameters  
NAME qyj-C-Tips-CDC13  
EXPNO 1  
PROCNO 1

F2 - Acquisition Parameters  
Date\_ 20150612  
Time 19.20 h  
INSTRUM spect  
PROBHD Z824601\_0021 (  
PULPROG zgpg30  
TD 65536  
SOLVENT CDC13  
NS 226  
DS 4  
SWH 24038.461 Hz  
FIDRES 0.366798 Hz  
AQ 1.3631488 sec  
RG 203  
DW 20.800 usec  
DE 6.50 usec  
TE 295.2 K  
D1 2.00000000 sec  
D11 0.03000000 sec  
TD0 1  
SFO1 100.6228298 MHz  
NUC1 13C  
P1 9.50 usec  
PLW1 41.25000000 W  
SFO2 400.1316005 MHz  
NUC2 1H  
CPDPRG[2] waltz16  
PCPD2 90.00 usec  
PLW2 8.31000042 W  
PLW12 0.23083000 W  
PLW13 0.11611000 W

F2 - Processing parameters  
SI 32768  
SF 100.6127557 MHz  
WDW EM  
SSB 0  
LB 1.00 Hz  
GB 0  
PC 1.40

CDC13

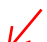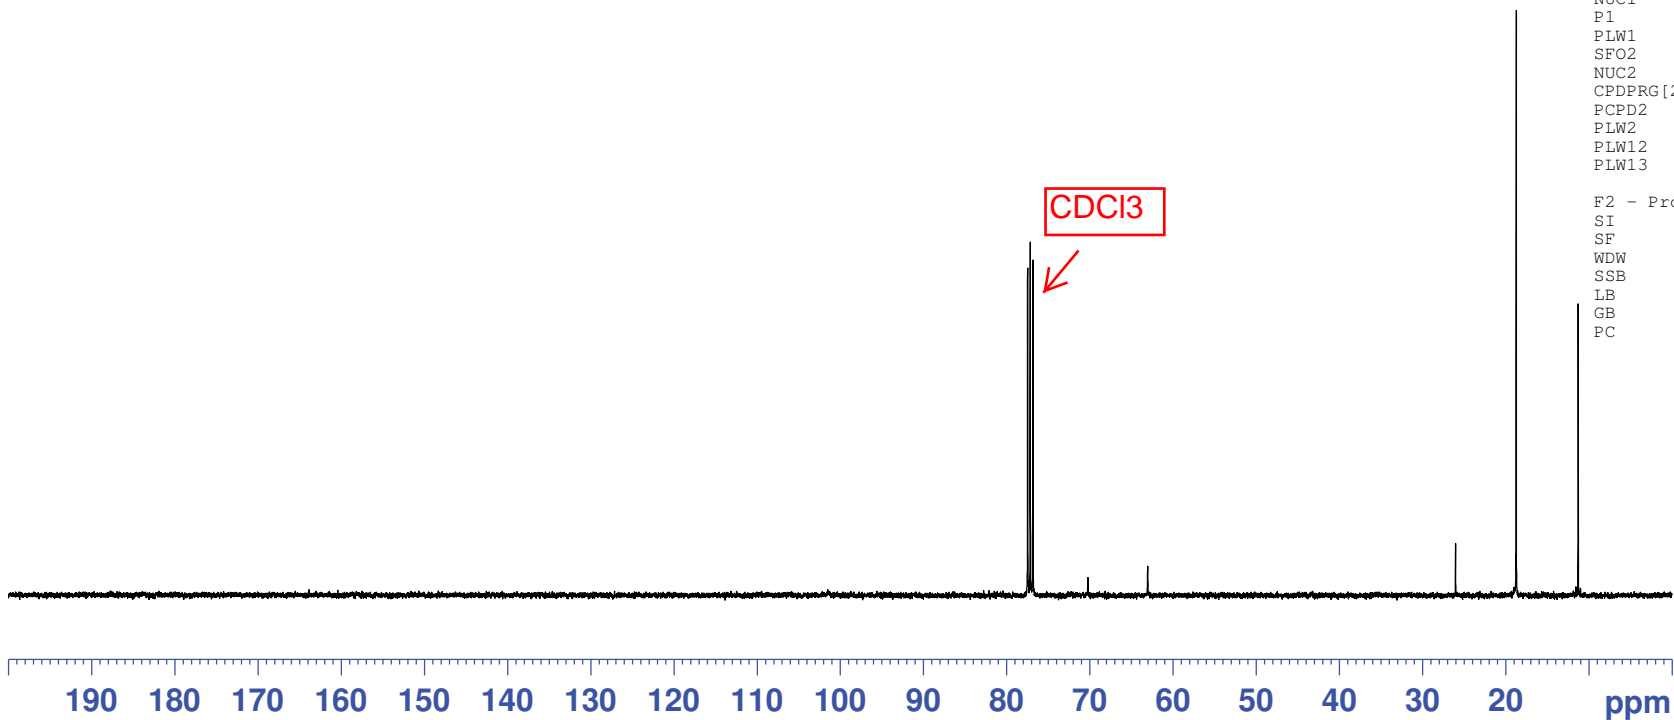

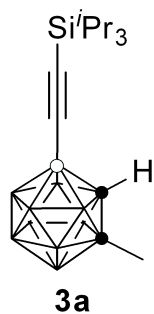

— -2.69  
 — -6.40  
 — -8.98  
 — -10.12  
 — -11.73  
 — -13.20

qyj-B-0358-CD2C12

```

NAME      qyj-B-0358-CD2C12
EXPNO     1
PROCNO    1
Date_     20141103
Time      19.50
INSTRUM   spect
PROBHD    5 mm PABBO BB-
PULPROG   zgdc
TD        65536
SOLVENT   C6D6
NS        8
DS        0
SWH       25510.203 Hz
FIDRES    0.389255 Hz
AQ        1.2845556 sec
RG        181
DW        19.600 usec
DE        6.50 usec
TE        299.5 K
D1        5.0000000 sec
D11       0.0300000 sec
TD0       1
  
```

```

===== CHANNEL f1 =====
NUC1      11B
P1        7.60 usec
PL1       -3.00 dB
PL1W      55.13059616 W
SFO1      128.3968556 MHz
  
```

```

===== CHANNEL f2 =====
CPDPRG2   waltz16
NUC2      1H
PCPD2     90.00 usec
PL2       -1.00 dB
PL12      15.16 dB
PL2W      13.56617069 W
PL12W     0.32844096 W
SFO2      400.1916008 MHz
SI        32768
SF        128.3969291 MHz
WDW       EM
SSB       0
LB        3.00 Hz
GB        0
PC        1.40
  
```

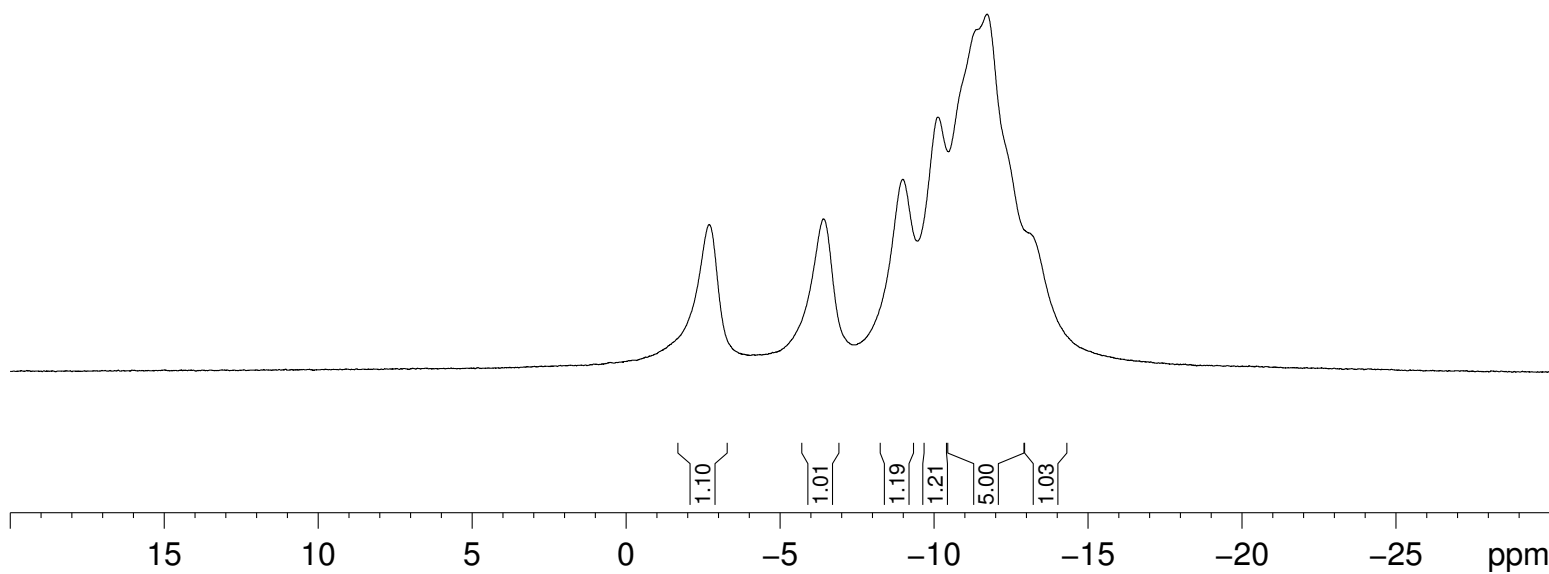

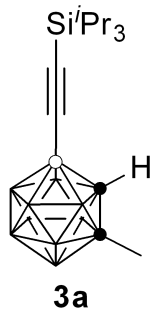

— -1.81  
 — -2.95  
  
 — -5.51  
 — -6.70  
 — -8.10  
 — -9.24  
 — -10.44  
 — -12.06  
 — -13.51

qyj-B-0358-CD2C12 (C)

```

NAME      qyj-B-0358-CD2C12 (C)
EXPNO     1
PROCNO    1
Date_     20141103
Time      19.52
INSTRUM   spect
PROBHD    5 mm PABBO BB-
PULPROG   zg30
TD        65536
SOLVENT   C6D6
NS        20
DS        0
SWH       25510.203 Hz
FIDRES    0.389255 Hz
AQ        1.2845556 sec
RG        362
DW        19.600 usec
DE        6.50 usec
TE        299.1 K
D1        5.0000000 sec
TD0       1
  
```

```

===== CHANNEL f1 =====
NUC1      11B
P1        7.60 usec
PL1       -3.00 dB
PL1W      55.13059616 W
SFO1      128.3968556 MHz
SI        32768
SF        128.3968865 MHz
WDW       EM
SSB       0
LB        3.00 Hz
GB        0
PC        1.40
  
```

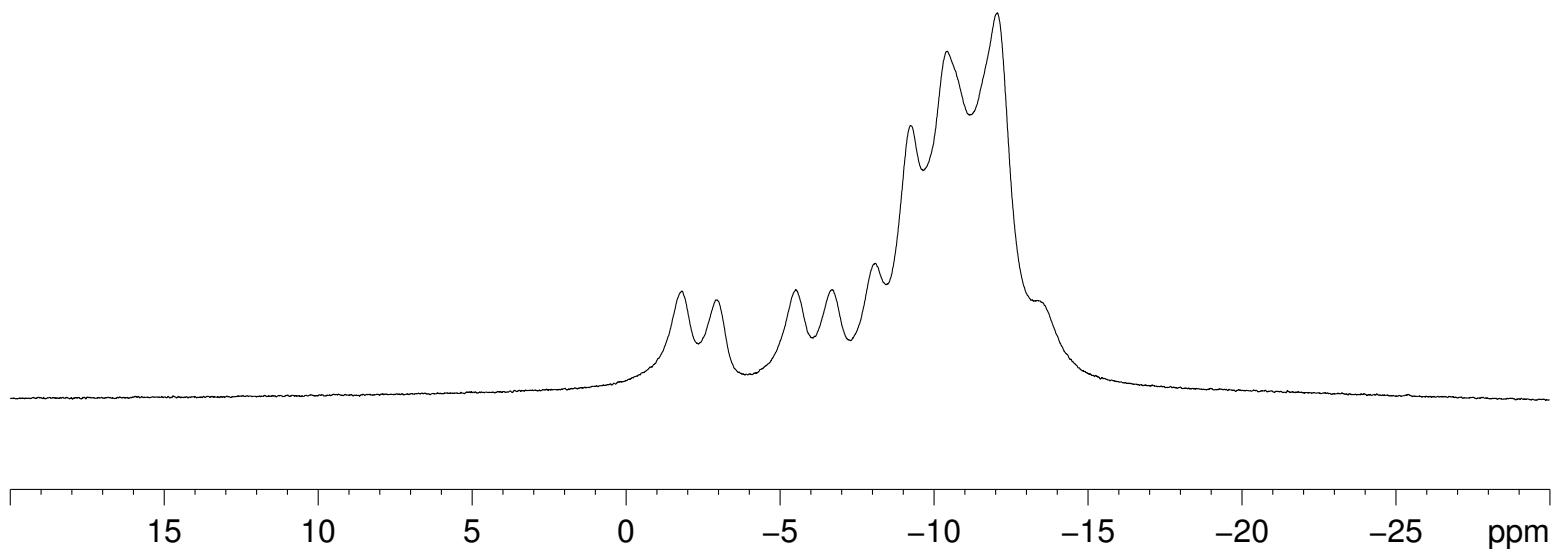



7.260

3.743

2.327  
2.308  
2.289  
2.270

1.123  
1.104  
1.063

qyj-H-0369-CDCI3

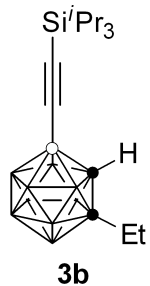

NAME qyj-H-0369-CDCI3  
EXPNO 1  
PROCNO 1  
Date\_ 20150516  
Time 16.03  
INSTRUM spect  
PROBHD 5 mm PABBO BB-  
PULPROG zg30  
TD 65536  
SOLVENT CDCl3  
NS 9  
DS 2  
SWH 8223.685 Hz  
FIDRES 0.125483 Hz  
AQ 3.9846387 sec  
RG 40.3  
DW 60.800 usec  
DE 6.50 usec  
TE 298.3 K  
D1 1.0000000 sec  
TD0 1

===== CHANNEL f1 =====  
NUC1 1H  
P1 14.00 usec  
PL1 -1.00 dB  
PL1W 13.56617069 W  
SFO1 400.1924713 MHz  
SI 32768  
SF 400.1900154 MHz  
WDW EM  
SSB 0  
LB 0.30 Hz  
GB 0  
PC 1.00

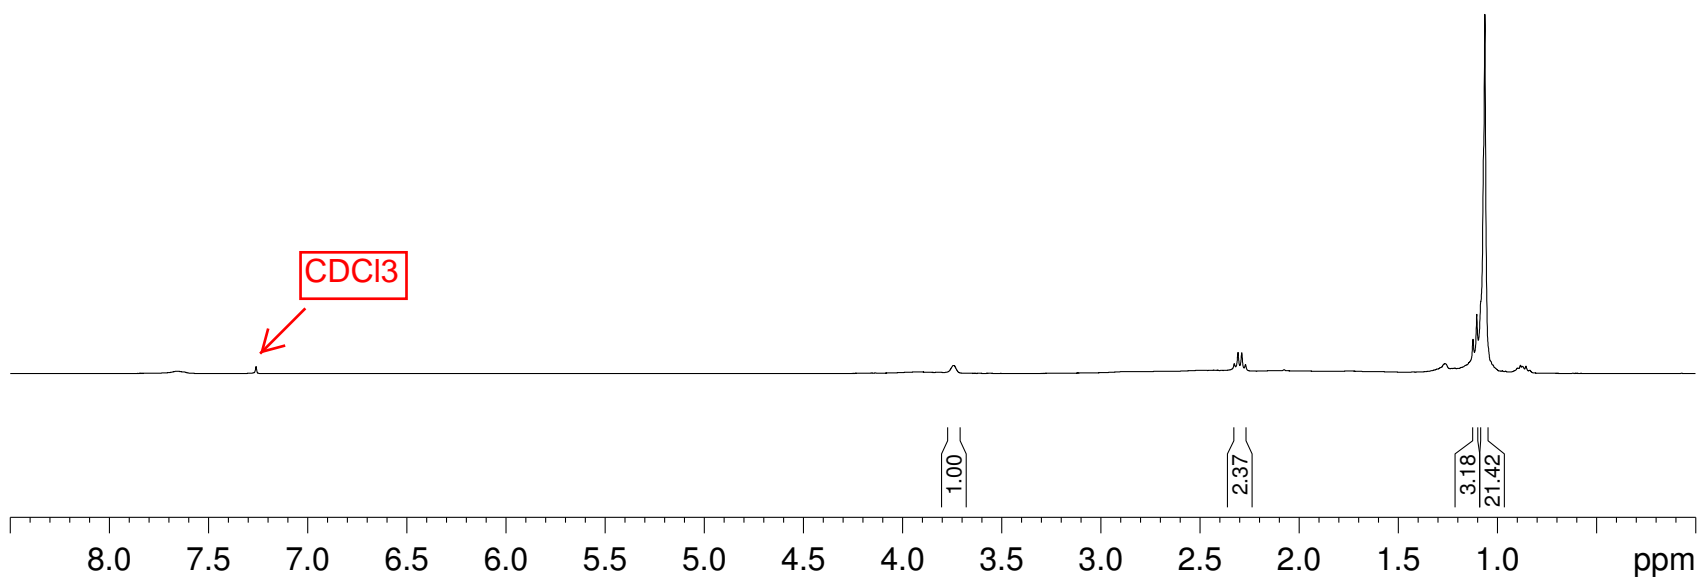

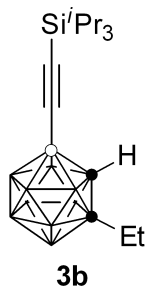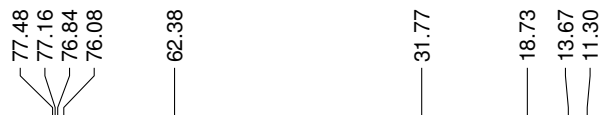

qyj-C-0456-CDC13

```

NAME      qyj-C-0369-CDC13
EXPNO     1
PROCNO    1
Date_     20150516
Time      16.07
INSTRUM   spect
PROBHD    5 mm PABBO BB-
PULPROG   zgpg30
TD         65536
SOLVENT   CDC13
NS         100
DS         4
SWH        24038.461 Hz
FIDRES     0.366798 Hz
AQ         1.3631988 sec
RG         2050
DW         20.800 usec
DE         6.50 usec
TE         298.6 K
D1         2.00000000 sec
D11        0.03000000 sec
TD0        1
  
```

```

===== CHANNEL f1 =====
NUC1      13C
P1         9.90 usec
PL1        -2.00 dB
PL1W       55.33689499 W
SFO1      100.6379183 MHz
  
```

```

===== CHANNEL f2 =====
CPDPRG2   waltz16
NUC2       1H
PCPD2      90.00 usec
PL2        -1.00 dB
PL12       15.16 dB
PL13       18.62 dB
PL2W       13.56617069 W
PL12W      0.32844096 W
PL13W      0.14806664 W
SFO2       400.1916008 MHz
SI         32768
SF         100.6278431 MHz
WDW        EM
SSB         0
LB          1.00 Hz
GB          0
PC          1.40
  
```

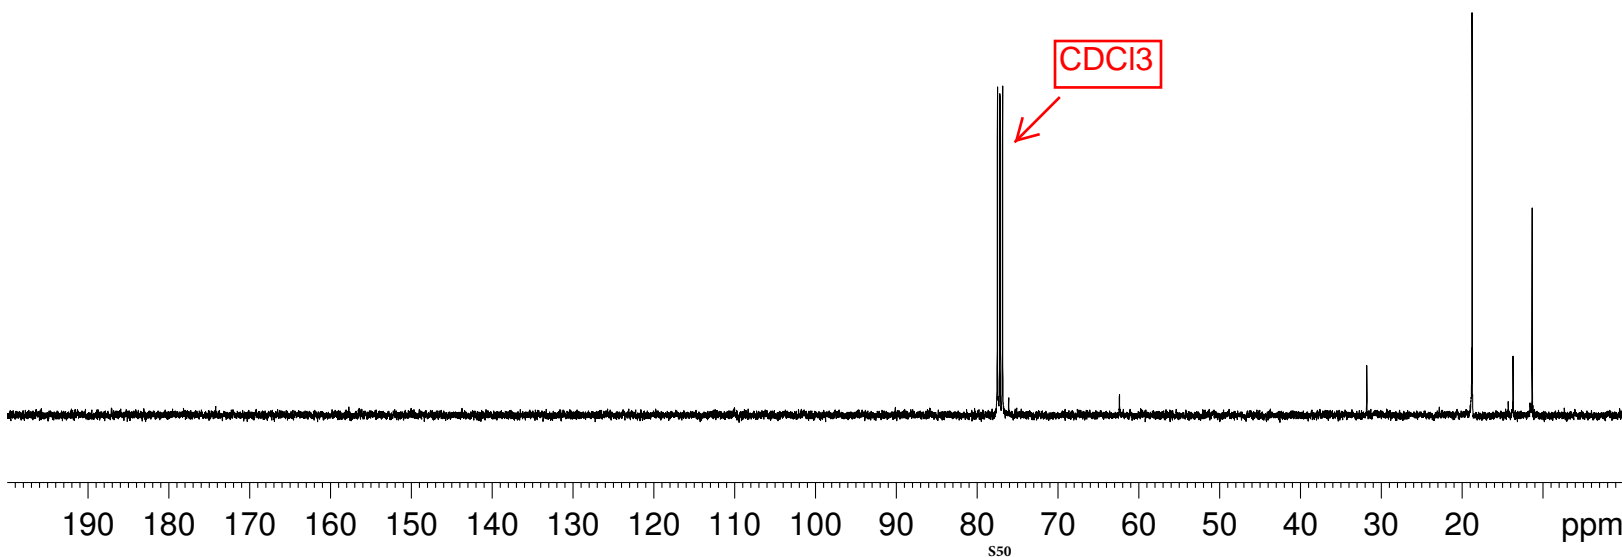

— -3.04  
 — -5.34  
 — -8.85  
 — -10.06  
 — -12.06  
 — -14.06

qyj-B-0369-CDC13

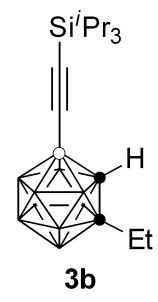

```

NAME      qyj-B-0369-CDC13
EXPNO     1
PROCNO    1
Date_     20150516
Time      19.27
INSTRUM   spect
PROBHD    5 mm PABBO BB-
PULPROG   zgdc
TD         65536
SOLVENT   C6D6
NS         12
DS         0
SWH       25510.203 Hz
FIDRES    0.389255 Hz
AQ         1.2845556 sec
RG         362
DW         19.600 usec
DE         6.50 usec
TE         299.0 K
D1         5.00000000 sec
D11        0.03000000 sec
TD0        1
  
```

```

===== CHANNEL f1 =====
NUC1      11B
P1         7.60 usec
PL1        -3.00 dB
PL1W      55.13059616 W
SFO1      128.3968556 MHz
  
```

```

===== CHANNEL f2 =====
CPDPRG2   waltz16
NUC2       1H
PCPD2      90.00 usec
PL2        -1.00 dB
PL12       15.16 dB
PL2W      13.56617069 W
PL12W     0.32844096 W
SFO2      400.1916008 MHz
SI         32768
SF         128.3968847 MHz
WDW        EM
SSB         0
LB          3.00 Hz
GB          0
PC          1.40
  
```

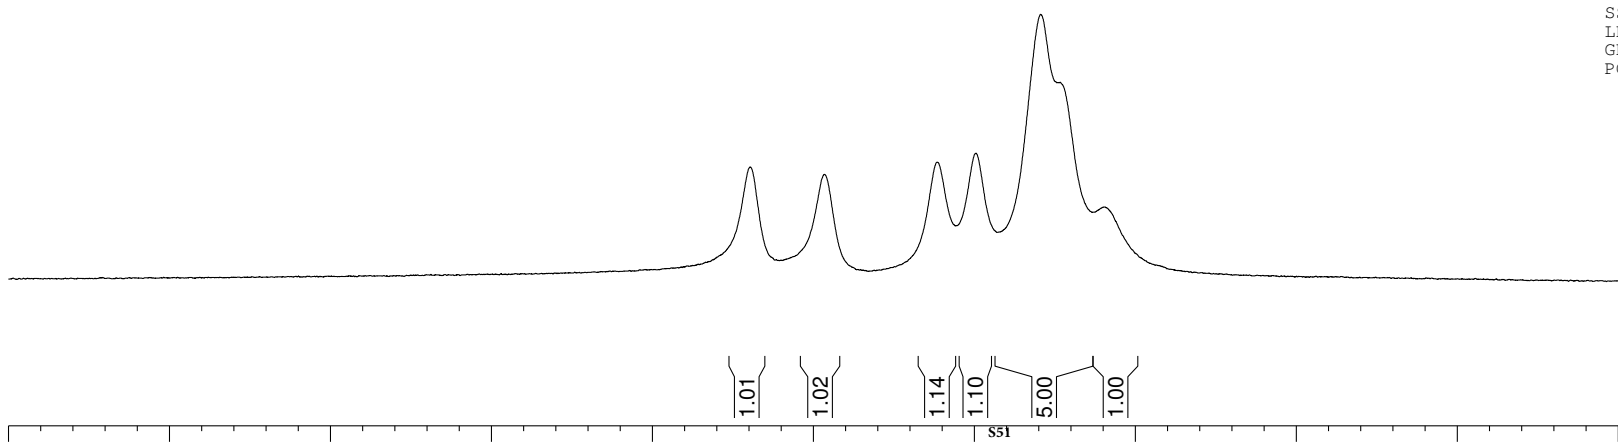

-2.52  
 -3.65  
 -4.77  
 -5.97  
 -8.31  
 -9.47  
 -10.65  
 -11.43  
 -12.67  
 -13.55  
 -14.74

qyj-B-0369-CDC13 (C)

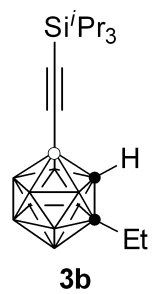

```

NAME      qyj-B-0369-CDC13 (C)
EXPNO     1
PROCNO    1
Date_     20150516
Time      19.29
INSTRUM   spect
PROBHD    5 mm PABBO BB-
PULPROG   zg30
TD        65536
SOLVENT   C6D6
NS        16
DS        0
SWH       25510.203 Hz
FIDRES    0.389255 Hz
AQ        1.2845556 sec
RG        512
DW        19.600 usec
DE        6.50 usec
TE        298.7 K
D1        5.00000000 sec
TD0       1
  
```

```

===== CHANNEL f1 =====
NUC1      11B
P1        7.60 usec
PL1       -3.00 dB
PL1W      55.13059616 W
SFO1      128.3968556 MHz
SI        32768
SF        128.3968865 MHz
WDW       EM
SSB       0
LB        3.00 Hz
GB        0
PC        1.40
  
```

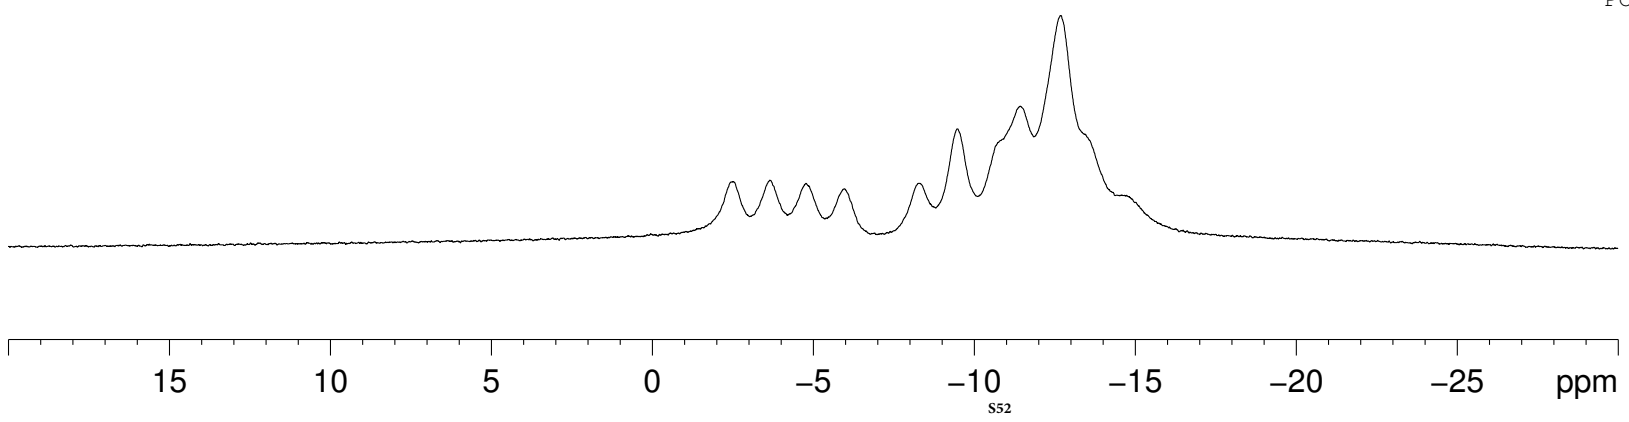

qyj-H-0360-CD2Cl2

NAME qyj-H-0360-CD2Cl2  
EXPNO 1  
PROCNO 1  
Date\_ 20141103  
Time 17.19  
INSTRUM spect  
PROBHD 5 mm PABBO BB-  
PULPROG zg30  
TD 65536  
SOLVENT CD2Cl2  
NS 12  
DS 2  
SWH 8223.685 Hz  
FIDRES 0.125483 Hz  
AQ 3.9846387 sec  
RG 32  
DW 60.800 usec  
DE 6.50 usec  
TE 298.7 K  
D1 1.00000000 sec  
TD0 1

===== CHANNEL f1 =====  
NUC1 1H  
P1 14.00 usec  
PL1 -1.00 dB  
PL1W 13.56617069 W  
SFO1 400.1924713 MHz  
SI 32768  
SF 400.1900209 MHz  
WDW EM  
SSB 0  
LB 0.30 Hz  
GB 0  
PC 1.00

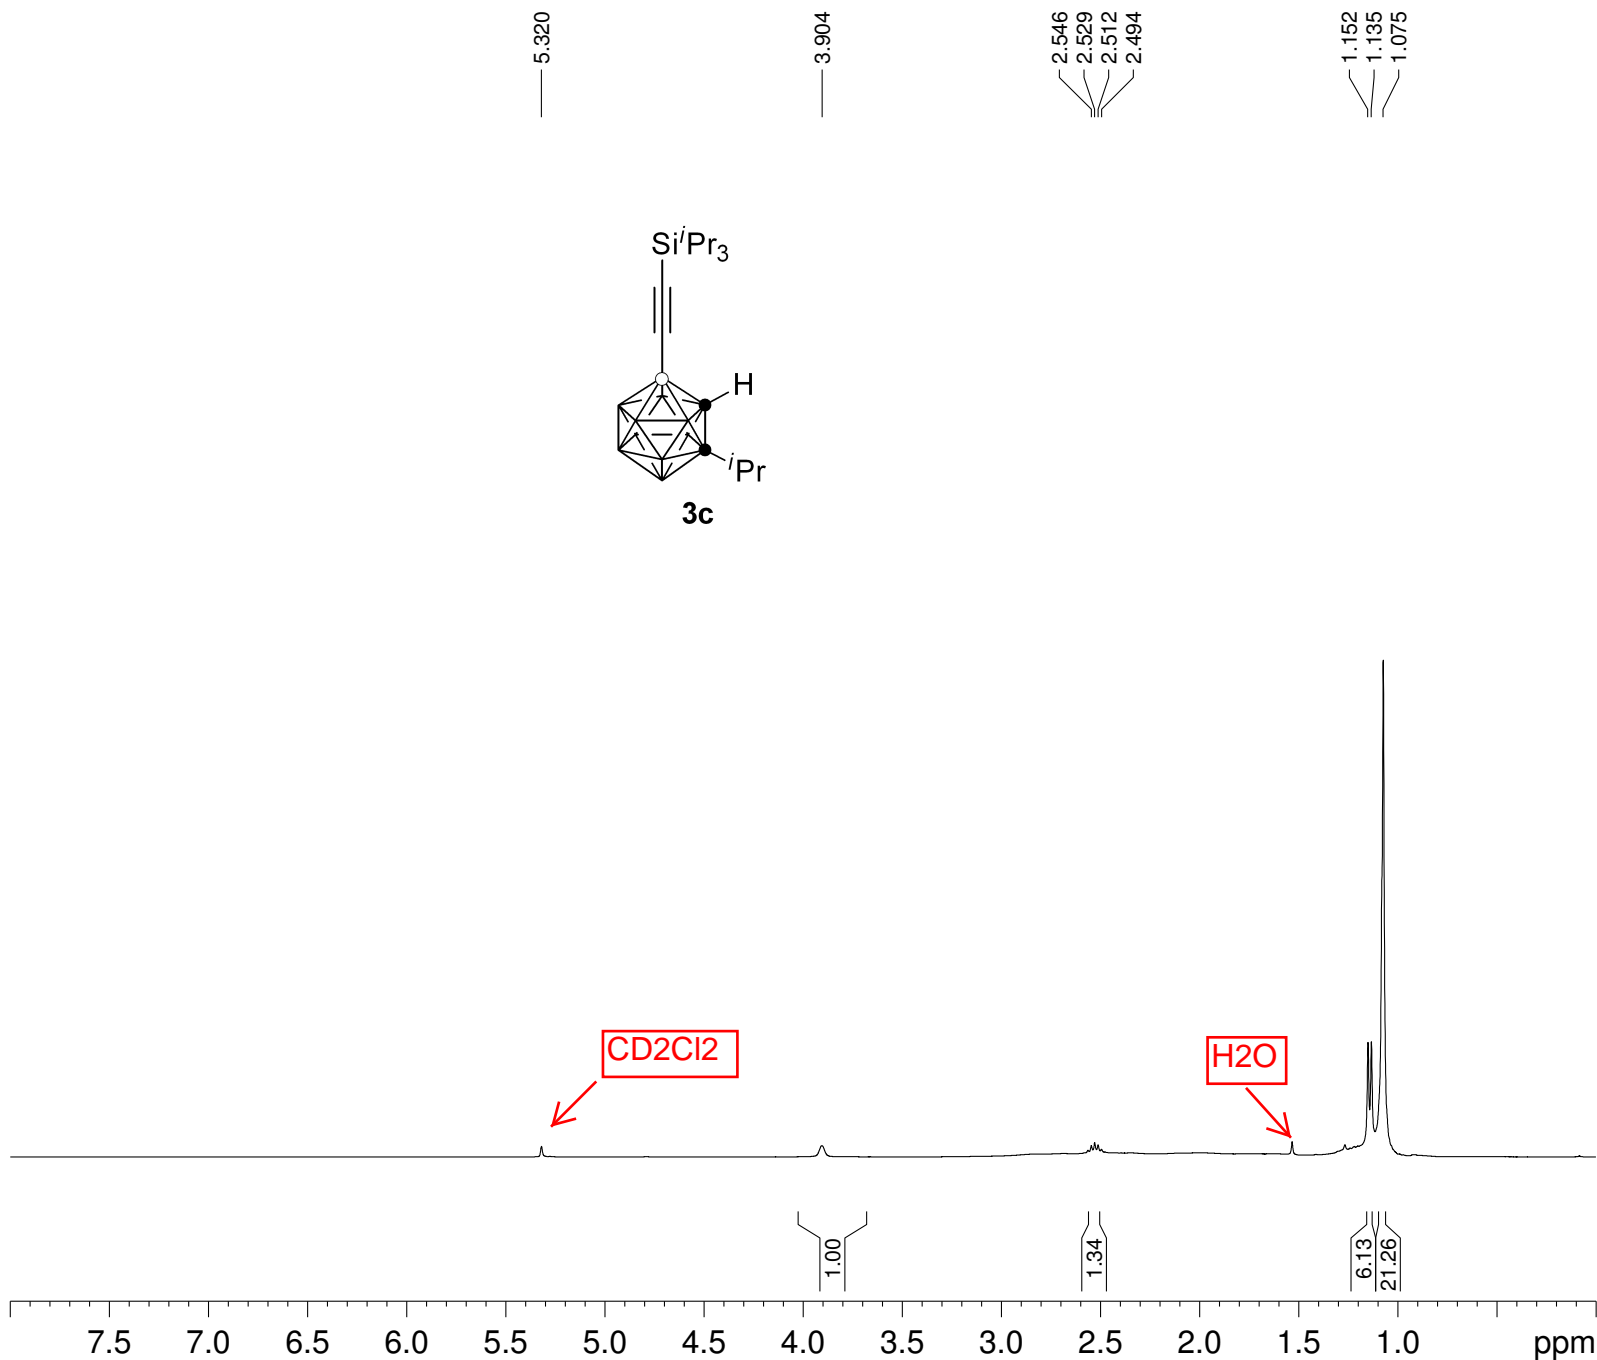

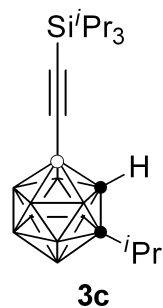

81.96  
 62.36  
 54.38  
 54.11  
 53.84  
 53.57  
 53.30  
 35.32  
 23.14  
 23.10  
 18.78  
 11.60

qyj-C-0360-CD2C12

```

NAME      qyj-C-0360-CD2C12
EXPNO     1
PROCNO    1
Date_     20141103
Time      17.25
INSTRUM   spect
PROBHD    5 mm PABBO BB-
PULPROG   zgpg30
TD         65536
SOLVENT   CD2C12
NS         96
DS         4
SWH        24038.461 Hz
FIDRES     0.366798 Hz
AQ         1.3631988 sec
RG         181
DW         20.800 usec
DE         6.50 usec
TE         299.0 K
D1         2.00000000 sec
D11        0.03000000 sec
TD0        1
  
```

```

===== CHANNEL f1 =====
NUC1      13C
P1         9.90 usec
PL1        -2.00 dB
PL1W       55.33689499 W
SFO1      100.6379183 MHz
  
```

```

===== CHANNEL f2 =====
CPDPRG2   waltz16
NUC2       1H
PCPD2      90.00 usec
PL2        -1.00 dB
PL12       15.16 dB
PL13       18.62 dB
PL2W       13.56617069 W
PL12W      0.32844096 W
PL13W      0.14806664 W
SFO2       400.1916008 MHz
SI         32768
SF         100.6278125 MHz
WDW        EM
SSB         0
LB          1.00 Hz
GB          0
PC          1.40
  
```

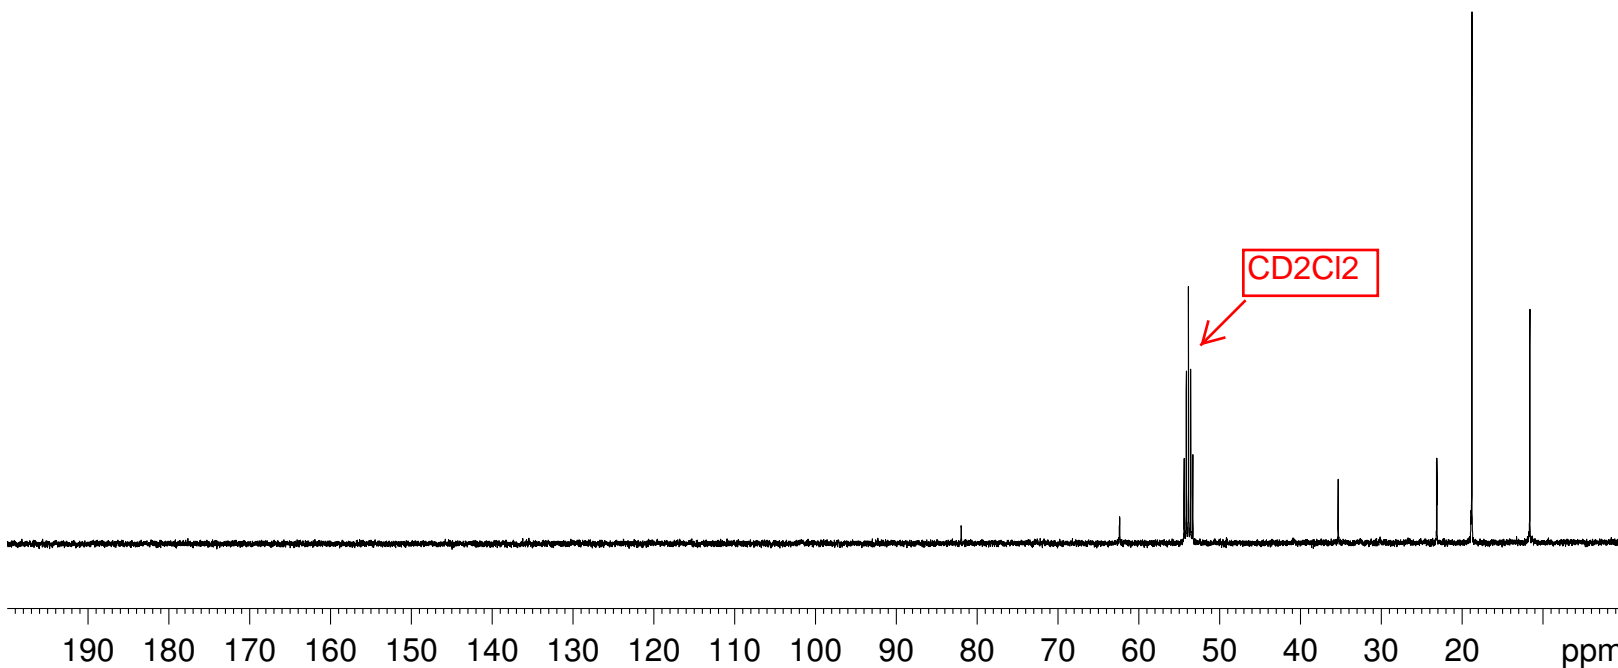

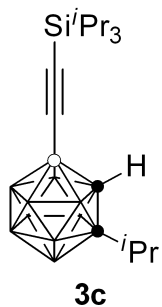

—4.11 —5.08  
 —9.26 —10.42  
 —12.64 —13.99

qyj-B-0360-CD2C12

```

NAME      qyj-B-0360-CD2C12
EXPNO     1
PROCNO    1
Date_     20141103
Time      17.29
INSTRUM   spect
PROBHD    5 mm PABBO BB-
PULPROG   zgdc
TD        65536
SOLVENT   CD2C12
NS        8
DS        0
SWH       25510.203 Hz
FIDRES    0.389255 Hz
AQ        1.2845556 sec
RG        228
DW        19.600 usec
DE        6.50 usec
TE        299.1 K
D1        5.0000000 sec
D11       0.0300000 sec
TD0       1
  
```

```

===== CHANNEL f1 =====
NUC1      11B
P1        7.60 usec
PL1       -3.00 dB
PL1W      55.13059616 W
SFO1      128.3968556 MHz
  
```

```

===== CHANNEL f2 =====
CPDPRG2   waltz16
NUC2      1H
PCPD2     90.00 usec
PL2       -1.00 dB
PL12      15.16 dB
PL2W      13.56617069 W
PL12W     0.32844096 W
SFO2      400.1916008 MHz
SI        32768
SF        128.3969291 MHz
WDW       EM
SSB       0
LB        3.00 Hz
GB        0
PC        1.40
  
```

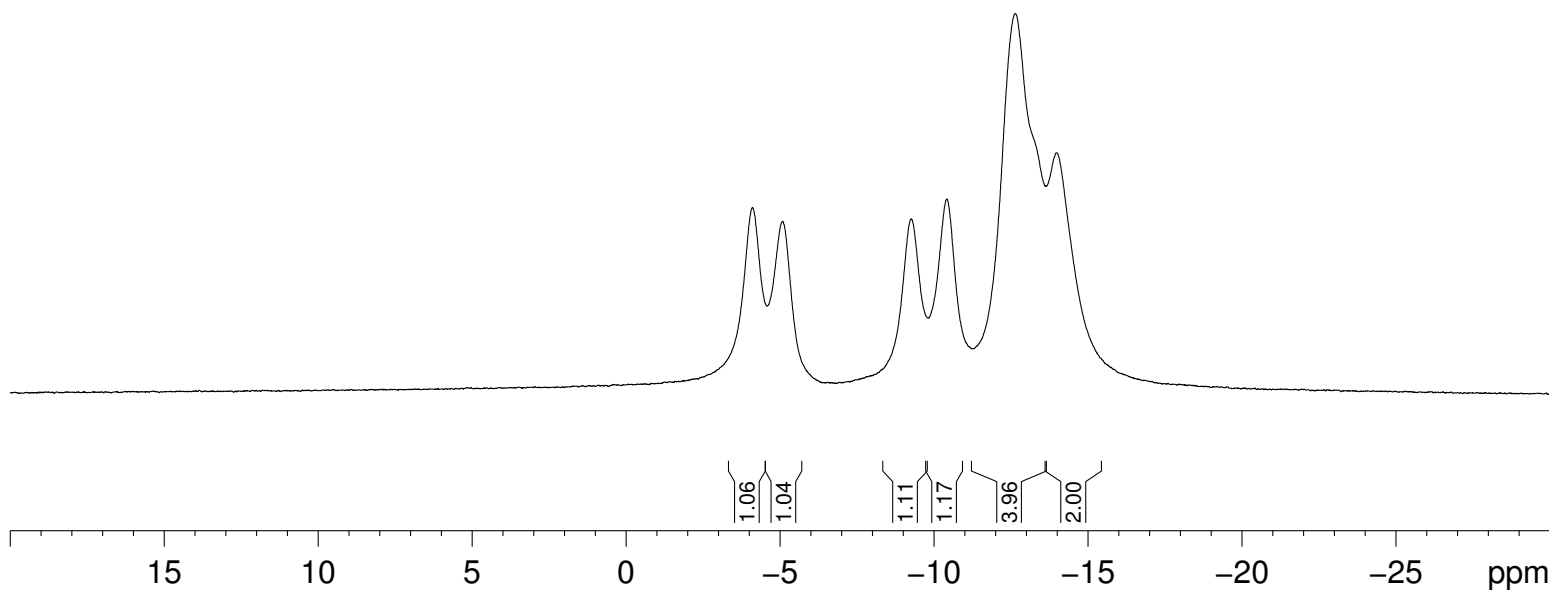

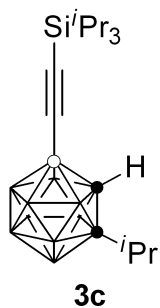

| -3.20  
 | -4.27  
 | -5.31  
  
 | -8.34  
 | -9.52  
 | -10.71  
 | -11.65  
 | -12.98  
 | -14.37

qyj-B-0360-CD2C12 (C)

```

NAME      qyj-B-0360-CD2C12 (C)
EXPNO     1
PROCNO    1
Date_     20141103
Time      17.31
INSTRUM   spect
PROBHD    5 mm PABBO BB-
PULPROG   zg30
TD        65536
SOLVENT   CD2C12
NS        16
DS        0
SWH       25510.203 Hz
FIDRES    0.389255 Hz
AQ        1.2845556 sec
RG        362
DW        19.600 usec
DE        6.50 usec
TE        298.9 K
D1        5.0000000 sec
TD0       1
  
```

```

===== CHANNEL f1 =====
NUC1      11B
P1        7.60 usec
PL1       -3.00 dB
PL1W      55.13059616 W
SFO1      128.3968556 MHz
SI        32768
SF        128.3968865 MHz
WDW       EM
SSB       0
LB        3.00 Hz
GB        0
PC        1.40
  
```

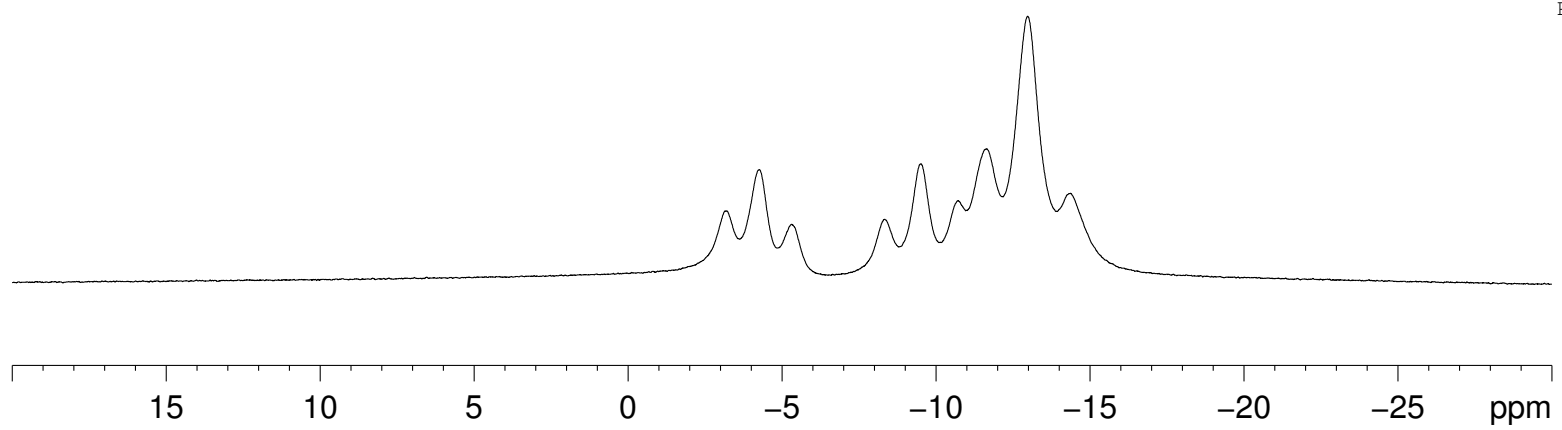



7.378  
7.365  
7.183  
7.177  
7.168  
7.165

5.320

3.543

1.045

qyj-H-0363-cd2c12

Bruker Advance III 400

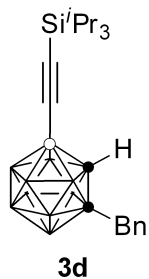

```
NAME      qyj-H-0363-cd2c12
EXPNO     1
PROCNO    1
Date_     20141108
Time      13.33
INSTRUM   spect
PROBHD    5 mm PADUL 13C
PULPROG   zg30
TD        65536
SOLVENT   CD2C12
NS        16
DS        2
SWH       8223.685 Hz
FIDRES    0.125483 Hz
AQ        3.9846387 sec
RG        128
DW        60.800 usec
DE        6.50 usec
TE        296.6 K
D1        1.00000000 sec
TD0       1
```

```
===== CHANNEL f1 =====
NUC1      1H
P1        14.83 usec
PL1       0.00 dB
PL1W      8.31434441 W
SFO1      400.1324710 MHz
SI        32768
SF        400.1300142 MHz
WDW       EM
SSB       0
LB        0.30 Hz
GB        0
PC        1.00
```

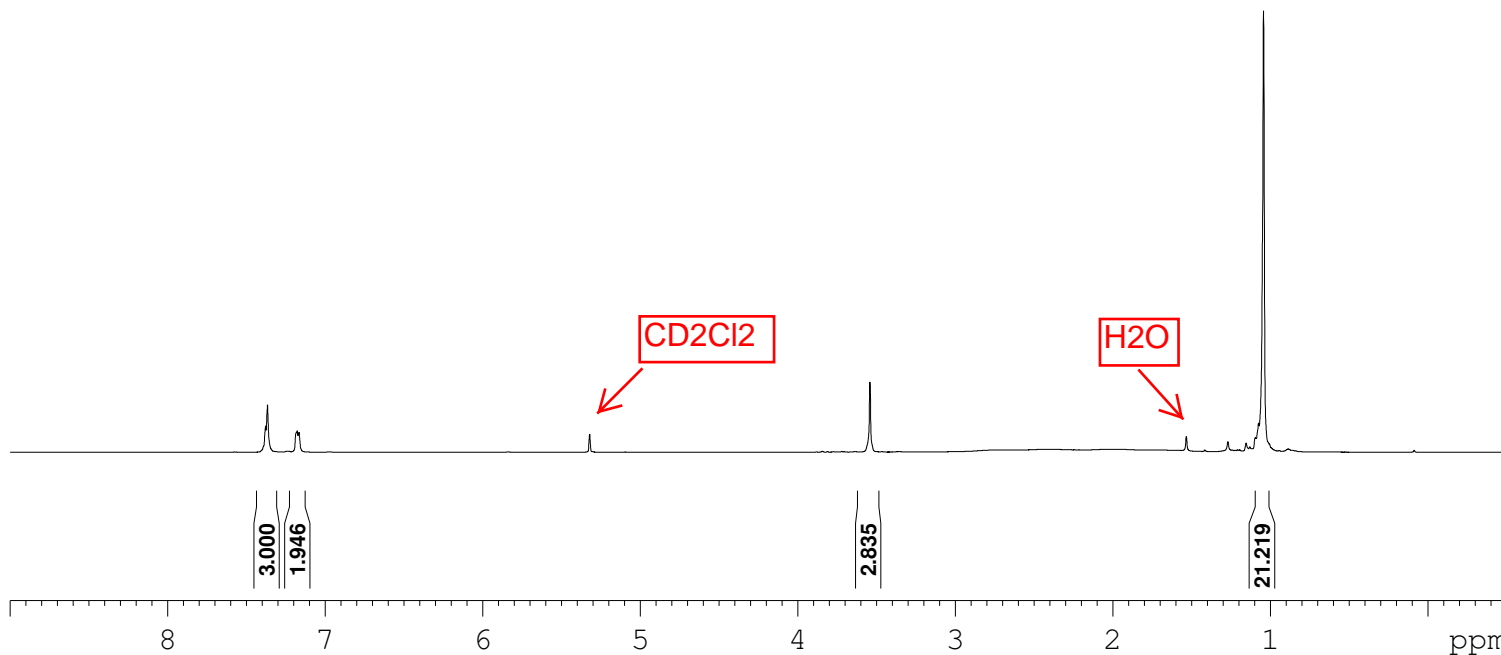

134.85  
130.24  
129.38  
128.86

75.31

61.96  
54.38  
54.11  
53.84  
53.57  
53.30  
43.88

18.74

11.56

qyj-C-0363-1-CD2Cl1:



NAME qyj-C-0363-1-CD2C12  
EXPNO 1  
PROCNO 1  
Date\_ 20141108  
Time 15.49  
INSTRUM spect  
PROBHD 5 mm PABBO BB-  
PULPROG zgpg30  
TD 65536  
SOLVENT CD2C12  
NS 577  
DS 4  
SWH 24038.461 Hz  
FIDRES 0.366798 Hz  
AQ 1.3631988 sec  
RG 203  
DW 20.800 usec  
DE 6.50 usec  
TE 298.7 K  
D1 2.00000000 sec  
D11 0.03000000 sec  
TD0 1

==== CHANNEL f1 =====  
NUC1 13C  
P1 9.90 usec  
PL1 -2.00 dB  
PL1W 55.33689499 W  
SFO1 100.6379183 MHz

==== CHANNEL f2 =====  
CPDPRG2 waltz16  
NUC2 1H  
PCPD2 90.00 usec  
PL2 -1.00 dB  
PL12 15.16 dB  
PL13 18.62 dB  
PL2W 13.56617069 W  
PL12W 0.32844096 W  
PL13W 0.14806664 W  
SFO2 400.1916008 MHz  
SI 32768  
SF 100.6278136 MHz  
WDW EM  
SSB 0  
LB 1.00 Hz  
GB 0  
PC 1.40

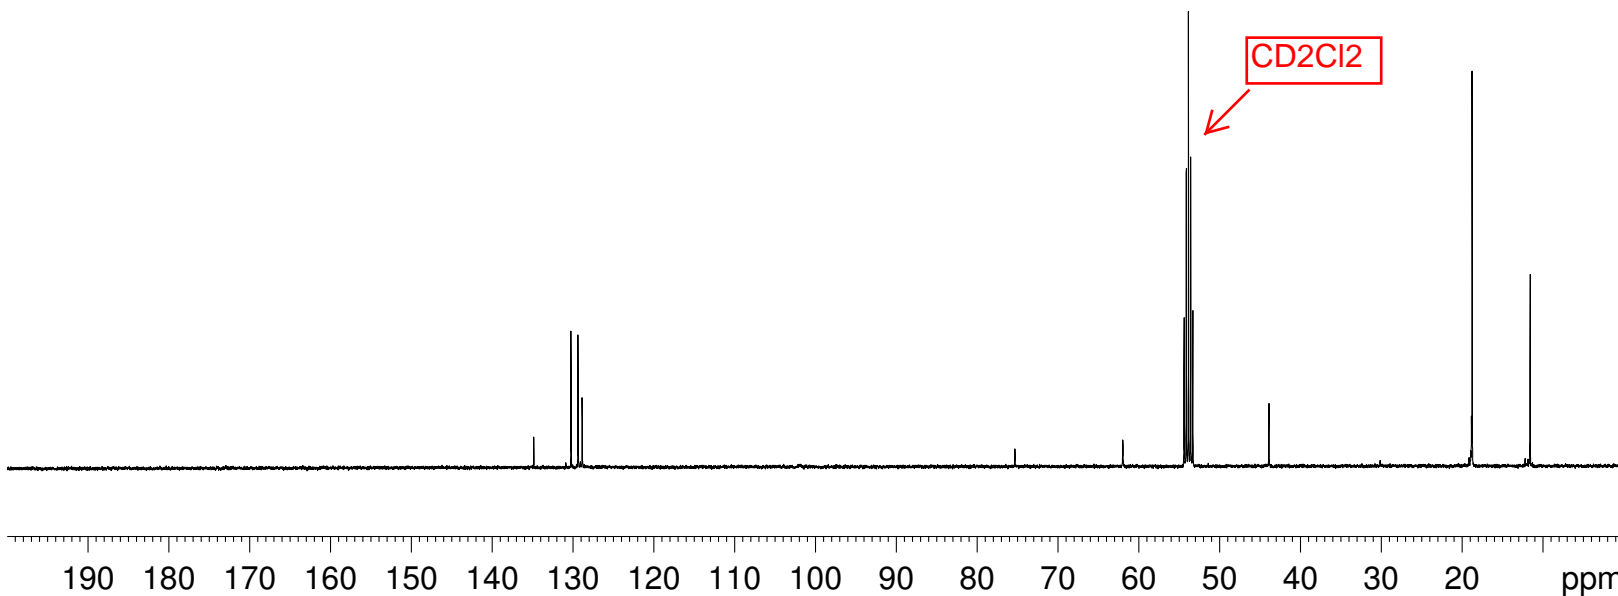

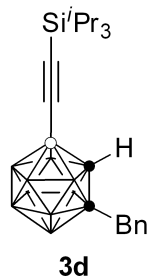

— 3.62  
 — 5.65  
 — 9.17  
 — 10.24  
 — 12.26  
 — 13.14

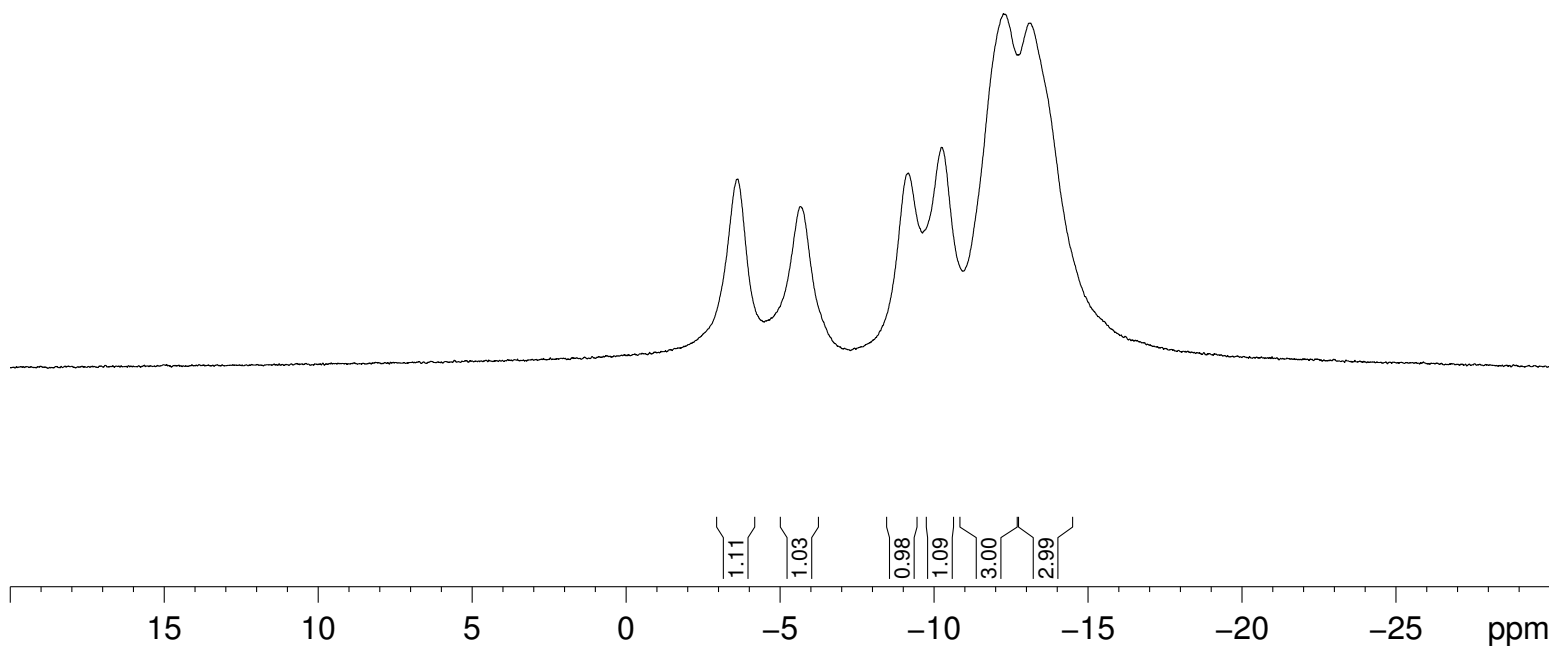

qyj-B-0363-1-CD2Cl2

```

NAME      qyj-B-0363-1-CD2Cl2
EXPNO     1
PROCNO    1
Date_     20141108
Time      15.33
INSTRUM   spect
PROBHD    5 mm PABBO BB-
PULPROG   zgdc
TD        65536
SOLVENT   CDCl3
NS        12
DS        0
SWH       25510.203 Hz
FIDRES    0.389255 Hz
AQ        1.2845556 sec
RG        181
DW        19.600 usec
DE        6.50 usec
TE        299.3 K
D1        5.00000000 sec
D11       0.03000000 sec
TD0       1
  
```

```

===== CHANNEL f1 =====
NUC1      11B
P1        7.60 usec
PL1       -3.00 dB
PL1W      55.13059616 W
SFO1      128.3968556 MHz
  
```

```

===== CHANNEL f2 =====
CPDPRG2   waltz16
NUC2      1H
PCPD2     90.00 usec
PL2       -1.00 dB
PL12      15.16 dB
PL2W      13.56617069 W
PL12W     0.32844096 W
SFO2      400.1916008 MHz
SI        32768
SF        128.3969291 MHz
WDW       EM
SSB       0
LB        3.00 Hz
GB        0
PC        1.40
  
```

-2.68  
 -3.84  
 -4.71  
 -5.91  
 -8.18  
 -9.36  
 -10.62  
 -11.20  
 -12.64  
 -13.89

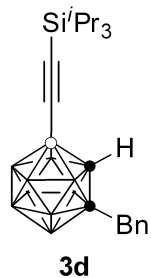

qyj-B-0363-1-CD2C12

NAME qyj-B-0363-1-CD2C12 (C)  
 EXPNO 1  
 PROCNO 1  
 Date\_ 20141108  
 Time 15.36  
 INSTRUM spect  
 PROBHD 5 mm PABBO BB-  
 PULPROG zg30  
 TD 65536  
 SOLVENT CDCl3  
 NS 20  
 DS 0  
 SWH 25510.203 Hz  
 FIDRES 0.389255 Hz  
 AQ 1.2845556 sec  
 RG 362  
 DW 19.600 usec  
 DE 6.50 usec  
 TE 299.0 K  
 D1 5.00000000 sec  
 TD0 1

===== CHANNEL f1 =====  
 NUC1 11B  
 P1 7.60 usec  
 PL1 -3.00 dB  
 PL1W 55.13059616 W  
 SFO1 128.3968556 MHz  
 SI 32768  
 SF 128.3968865 MHz  
 WDW EM  
 SSB 0  
 LB 3.00 Hz  
 GB 0  
 PC 1.40

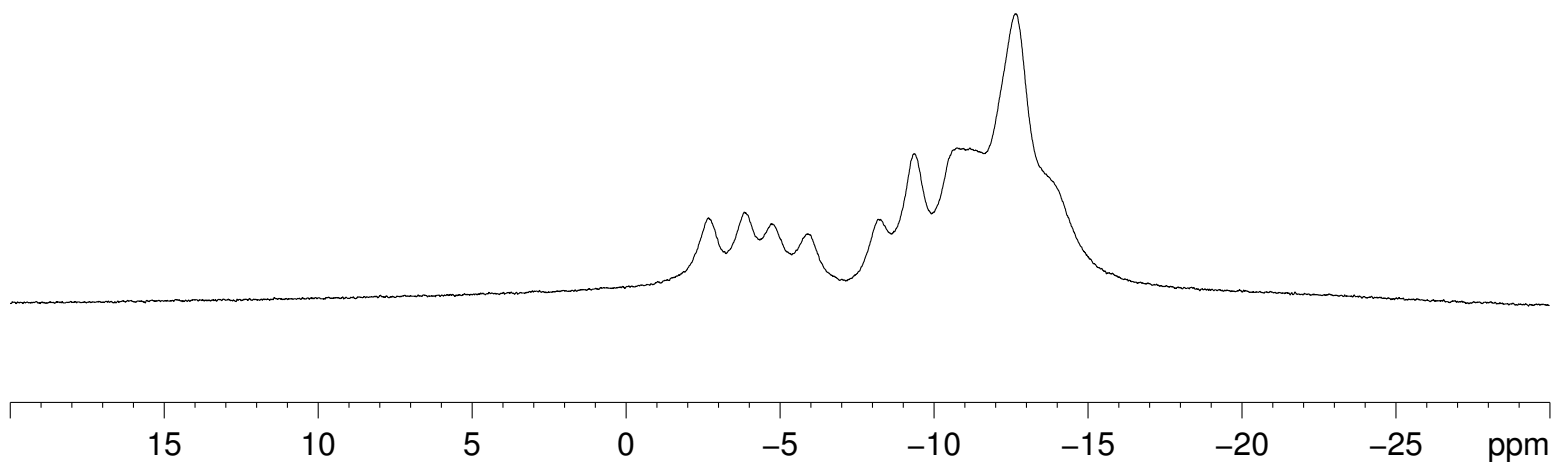

7.532  
7.513  
7.430  
7.413  
7.386  
7.367

5.320

4.247

1.083

qyj-H-0362-CD2Cl2

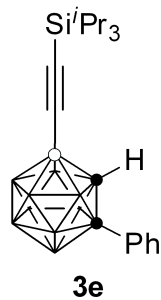

NAME qyj-H-0362-CD2Cl2  
EXPNO 1  
PROCNO 1  
Date\_ 20141104  
Time 20.39  
INSTRUM spect  
PROBHD 5 mm PABBO BB-  
PULPROG zg30  
TD 65536  
SOLVENT CD2Cl2  
NS 12  
DS 2  
SWH 8223.685 Hz  
FIDRES 0.125483 Hz  
AQ 3.9846387 sec  
RG 50.8  
DW 60.800 usec  
DE 6.50 usec  
TE 299.1 K  
D1 1.00000000 sec  
TD0 1

===== CHANNEL f1 =====  
NUC1 1H  
P1 14.00 usec  
PL1 -1.00 dB  
PL1W 13.56617069 W  
SFO1 400.1924713 MHz  
SI 32768  
SF 400.1900209 MHz  
WDW EM  
SSB 0  
LB 0.30 Hz  
GB 0  
PC 1.00

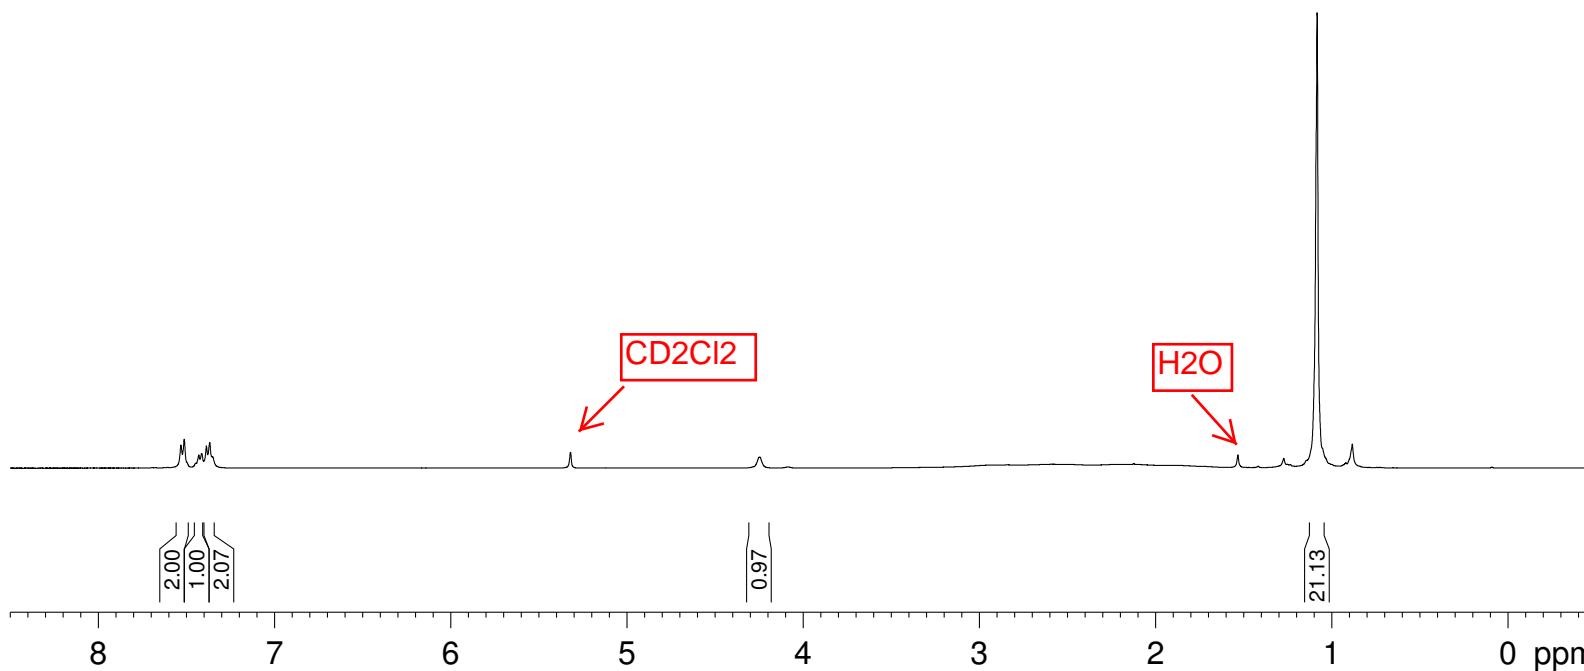

133.46  
130.50  
129.30  
128.10

77.08

62.38  
54.38  
54.11  
53.84  
53.57  
53.30

18.78

11.60

qyj-C-0362-CD2Cl2

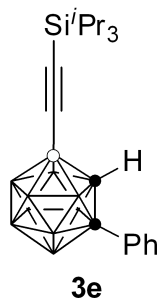

NAME qyj-C-0362-CD2Cl2  
EXPNO 1  
PROCNO 1  
Date\_ 20141104  
Time 20.43  
INSTRUM spect  
PROBHD 5 mm PABBO BB-  
PULPROG zgpg30  
TD 65536  
SOLVENT CD2Cl2  
NS 100  
DS 4  
SWH 24038.461 Hz  
FIDRES 0.366798 Hz  
AQ 1.3631988 sec  
RG 181  
DW 20.800 usec  
DE 6.50 usec  
TE 299.3 K  
D1 2.00000000 sec  
D11 0.03000000 sec  
TD0 1

===== CHANNEL f1 =====  
NUC1 13C  
P1 9.90 usec  
PL1 -2.00 dB  
PL1W 55.33689499 W  
SFO1 100.6379183 MHz

===== CHANNEL f2 =====  
CPDPRG2 waltz16  
NUC2 1H  
PCPD2 90.00 usec  
PL2 -1.00 dB  
PL12 15.16 dB  
PL13 18.62 dB  
PL2W 13.56617069 W  
PL12W 0.32844096 W  
PL13W 0.14806664 W  
SFO2 400.1916008 MHz  
SI 32768  
SF 100.6278132 MHz  
WDW EM  
SSB 0  
LB 1.00 Hz  
GB 0  
PC 1.40

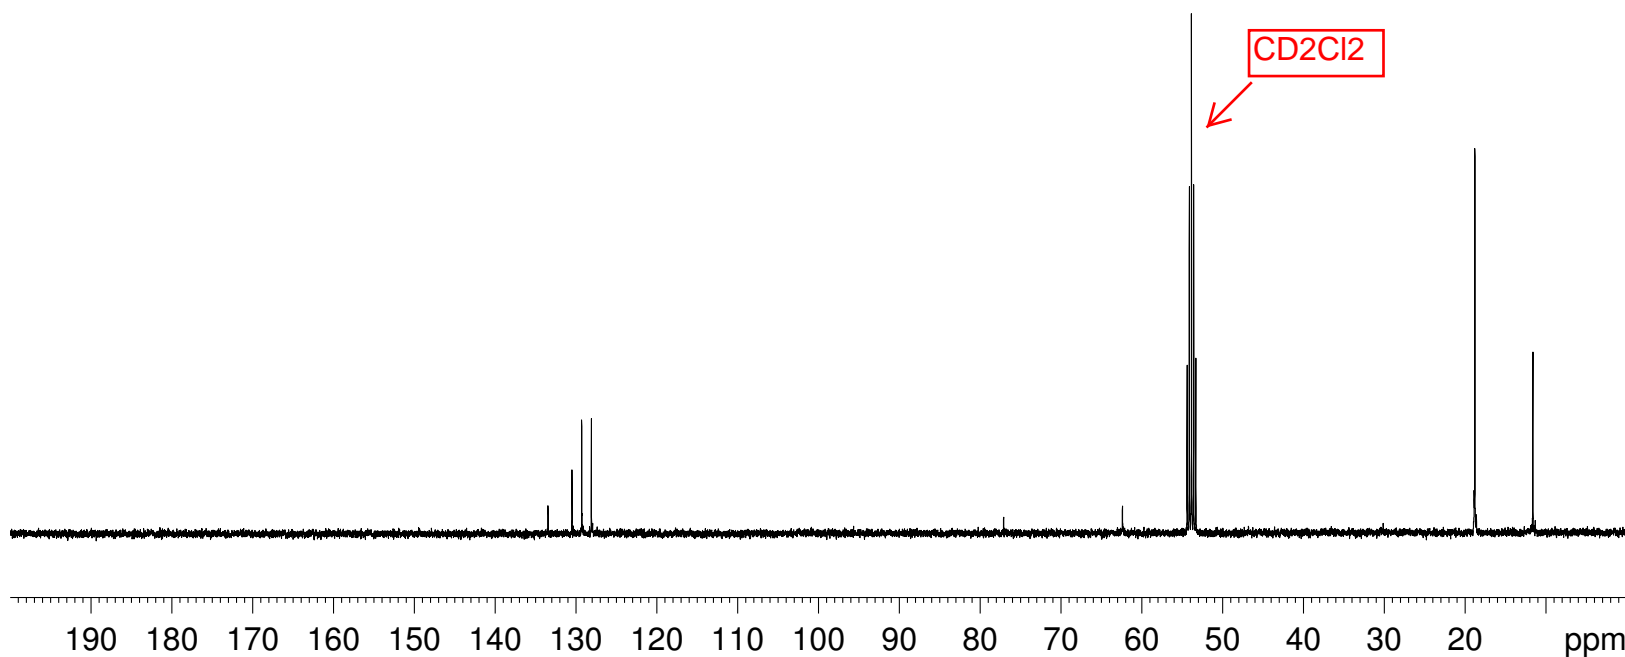

qyj-B-0362-CD2Cl2

NAME qyj-B-0362-CD2Cl2  
EXPNO 1  
PROCNO 1  
Date\_ 20141104  
Time 20.27  
INSTRUM spect  
PROBHD 5 mm PABBO BB-  
PULPROG zgdc  
TD 65536  
SOLVENT CDCl3  
NS 12  
DS 0  
SWH 25510.203 Hz  
FIDRES 0.389255 Hz  
AQ 1.2845556 sec  
RG 181  
DW 19.600 usec  
DE 6.50 usec  
TE 299.4 K  
D1 5.0000000 sec  
D11 0.0300000 sec  
TD0 1

==== CHANNEL f1 =====  
NUC1 11B  
P1 7.60 usec  
PL1 -3.00 dB  
PL1W 55.13059616 W  
SFO1 128.3968556 MHz

==== CHANNEL f2 =====  
CPDPRG2 waltz16  
NUC2 1H  
PCPD2 90.00 usec  
PL2 -1.00 dB  
PL12 15.16 dB  
PL2W 13.56617069 W  
PL12W 0.32844096 W  
SFO2 400.1916008 MHz  
SI 32768  
SF 128.3969291 MHz  
WDW EM  
SSB 0  
LB 3.00 Hz  
GB 0  
PC 1.40

— -3.23  
— -4.36  
  
— -9.06  
— -10.08  
  
— -12.07  
— -13.29

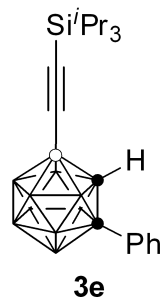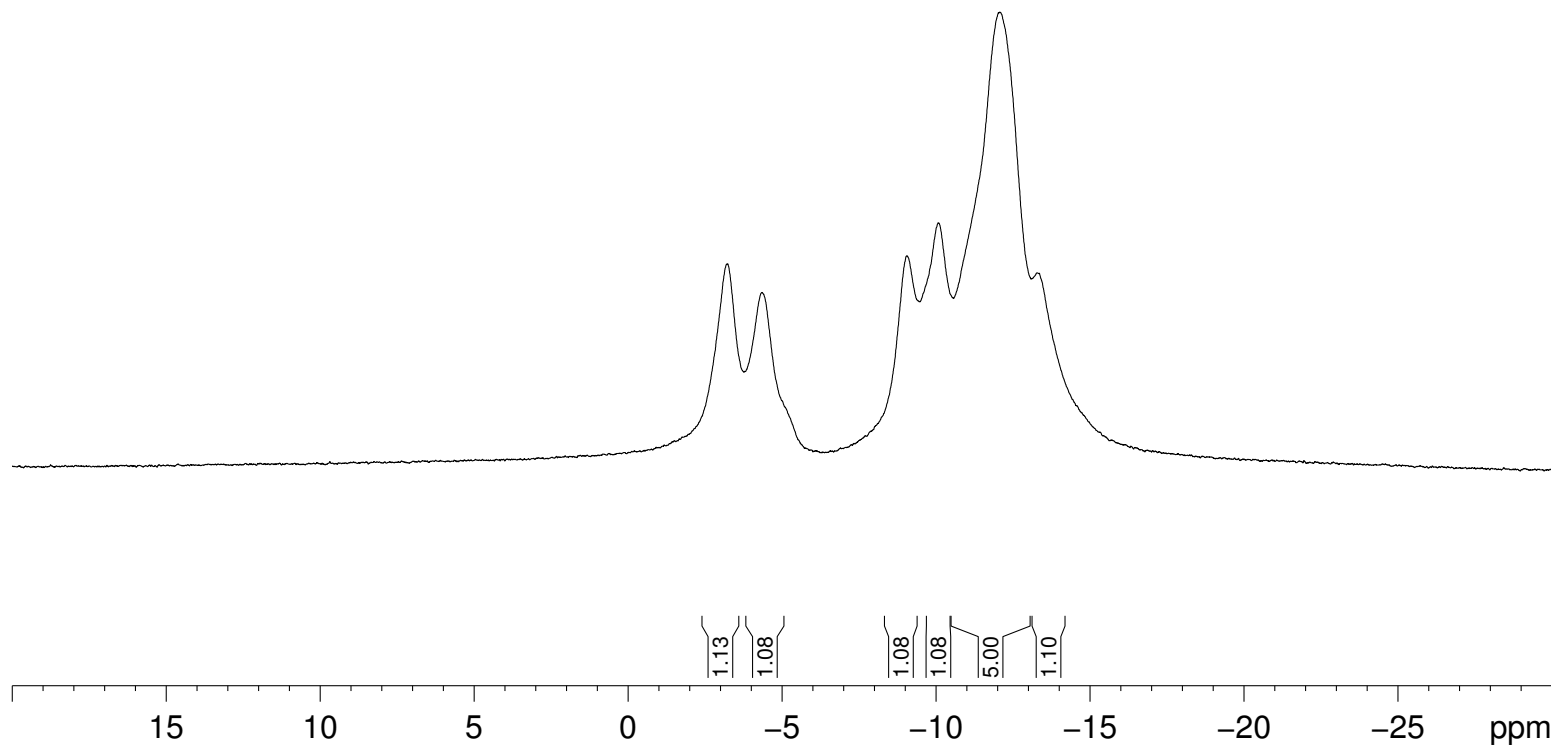

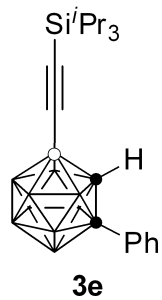

— -2.30  
 — -3.45  
 — -4.57  
  
 — -8.14  
 — -9.24  
 — -10.42  
 — -11.10  
 — -12.24  
 — -13.62

qyj-B-0362-CD2Cl2 (C

```

NAME      qyj-B-0362-CD2Cl2 (C)
EXPNO     1
PROCNO    1
Date_     20141104
Time      20.29
INSTRUM   spect
PROBHD    5 mm PABBO BB-
PULPROG   zg30
TD         65536
SOLVENT   CDC13
NS         20
DS         0
SWH       25510.203 Hz
FIDRES    0.389255 Hz
AQ         1.2845556 sec
RG         362
DW         19.600 usec
DE         6.50 usec
TE         299.0 K
D1         5.00000000 sec
TD0        1
  
```

```

===== CHANNEL f1 =====
NUC1      11B
P1         7.60 usec
PL1       -3.00 dB
PL1W      55.13059616 W
SFO1      128.3968556 MHz
SI         32768
SF         128.3968865 MHz
WDW        EM
SSB        0
LB         3.00 Hz
GB         0
PC         1.40
  
```

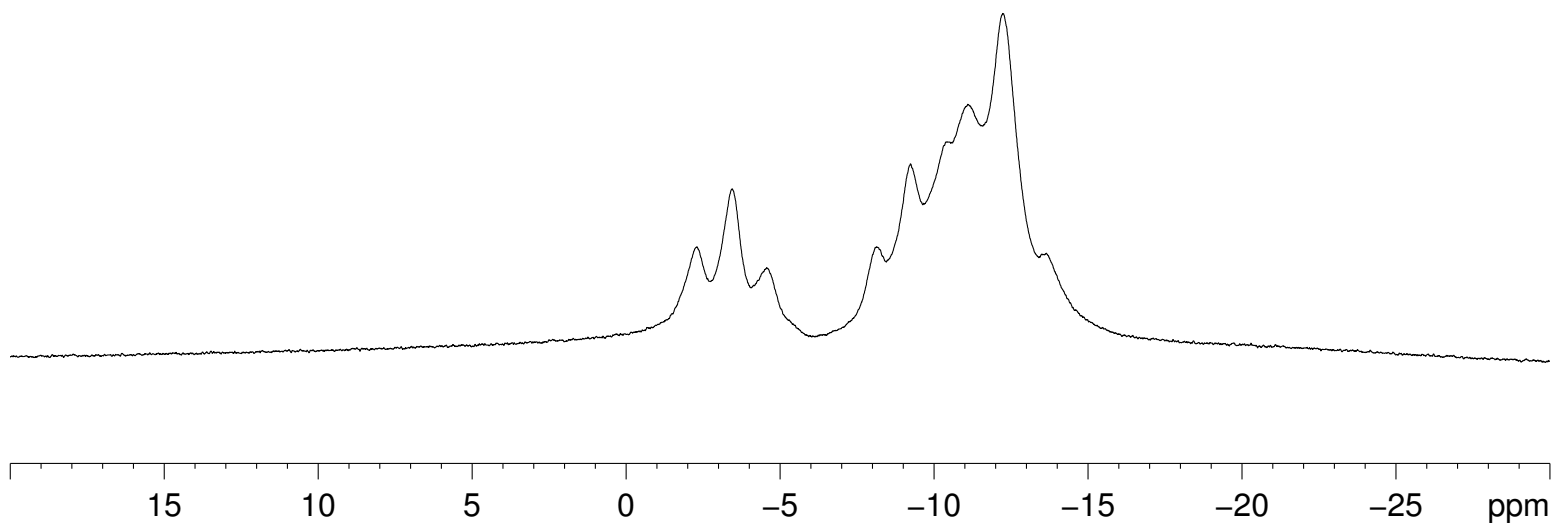



7.405  
7.384  
7.175  
7.154

5.320

4.204

2.342

1.536

1.083  
1.076

qyj-H-0366-cd2c12

Bruker Advance III 400

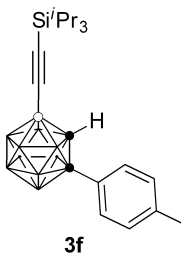

```
NAME      qyj-H-0366-cd2c12
EXPNO     1
PROCNO    1
Date_     20141110
Time      16.43
INSTRUM   spect
PROBHD    5 mm PADUL 13C
PULPROG   zg30
TD        65536
SOLVENT   CD2C12
NS        12
DS        2
SWH       8223.685 Hz
FIDRES    0.125483 Hz
AQ        3.9846387 sec
RG        203
DW        60.800 usec
DE        6.50 usec
TE        296.9 K
D1        1.00000000 sec
TD0       1
```

```
===== CHANNEL f1 =====
NUC1      1H
P1        14.83 usec
PL1       0.00 dB
PL1W      8.31434441 W
SFO1      400.1324710 MHz
SI        32768
SF        400.1300144 MHz
WDW       EM
SSB       0
LB        0.30 Hz
GB        0
PC        1.00
```

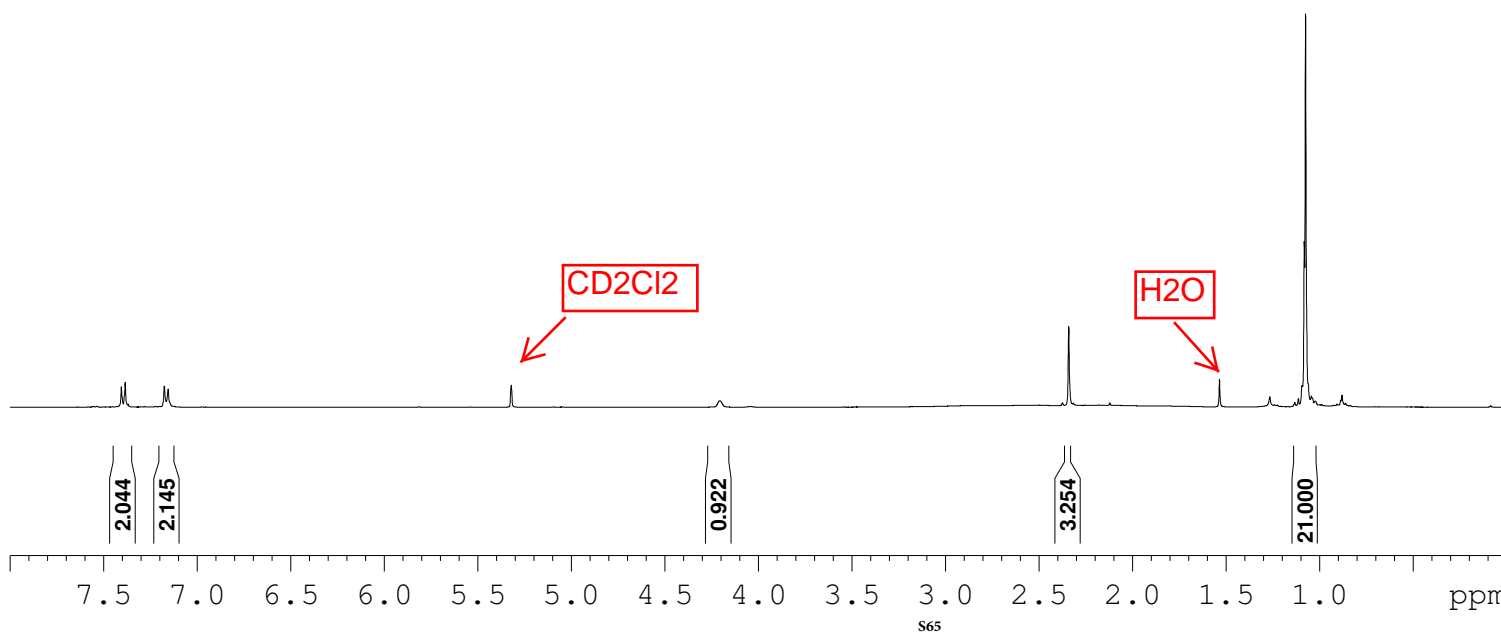

141.027  
130.599  
129.877  
128.018

77.302

62.624  
54.381  
54.110  
53.840  
53.570  
53.300

21.093  
18.765  
11.586

qyj-C-0366-cd2c12

Bruker Advance III 400

NAME qyj-C-0366-cd2c12  
EXPNO 1  
PROCNO 1  
Date\_ 20141110  
Time 16.46  
INSTRUM spect  
PROBHD 5 mm PADUL 13C  
PULPROG zgdc  
TD 131072  
SOLVENT CD2C12  
NS 222  
DS 0  
SWH 29761.904 Hz  
FIDRES 0.227065 Hz  
AQ 2.2020595 sec  
RG 203  
DW 16.800 usec  
DE 6.50 usec  
TE 297.2 K  
D1 1.00000000 sec  
D11 0.03000000 sec  
TD0 1

==== CHANNEL f1 =====  
NUC1 13C  
P1 9.68 usec  
PL1 -0.60 dB  
PL1W 41.24164963 W  
SFO1 100.6227690 MHz

==== CHANNEL f2 =====  
CPDPRG2 waltz16  
NUC2 1H  
PCPD2 90.00 usec  
PL2 0.00 dB  
PL12 15.66 dB  
PL2W 8.31434441 W  
PL12W 0.22585411 W  
SFO2 400.1320007 MHz  
SI 131072  
SF 100.6127255 MHz  
WDB EM  
SSB 0  
LB 1.00 Hz  
GB 0  
PC 1.40

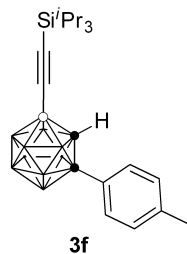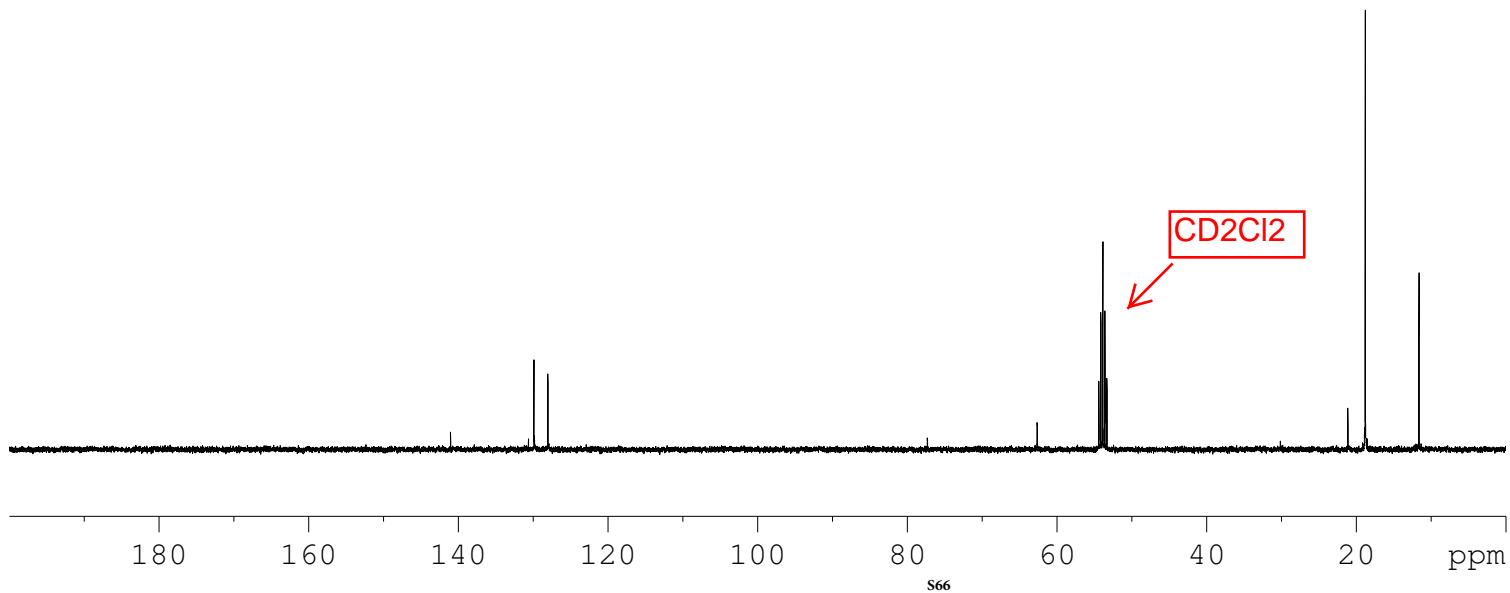

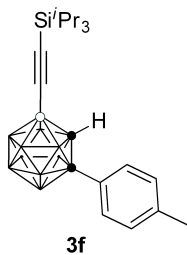

— -3.93 — -5.29 —  
 — -9.87 — -10.92 —  
 — -12.82 — -14.03 —

qyj-B-0366-CD2C12

NAME qyj-B-0366-CD2C12  
 EXPNO 1  
 PROCNO 1  
 Date\_ 20141110  
 Time 16.32  
 INSTRUM spect  
 PROBHD 5 mm PABBO BB-  
 PULPROG zgdc  
 TD 65536  
 SOLVENT MeOD  
 NS 16  
 DS 0  
 SWH 25510.203 Hz  
 FIDRES 0.389255 Hz  
 AQ 1.2845556 sec  
 RG 362  
 DW 19.600 usec  
 DE 6.50 usec  
 TE 299.0 K  
 D1 5.0000000 sec  
 D11 0.0300000 sec  
 TD0 1

==== CHANNEL f1 =====  
 NUC1 11B  
 P1 7.60 usec  
 PL1 -3.00 dB  
 PL1W 55.13059616 W  
 SFO1 128.3968556 MHz

==== CHANNEL f2 =====  
 CPDPRG2 waltz16  
 NUC2 1H  
 PCPD2 90.00 usec  
 PL2 -1.00 dB  
 PL12 15.16 dB  
 PL2W 13.56617069 W  
 PL12W 0.32844096 W  
 SFO2 400.1916008 MHz  
 SI 32768  
 SF 128.3969291 MHz  
 WDW EM  
 SSB 0  
 LB 3.00 Hz  
 GB 0  
 PC 1.40

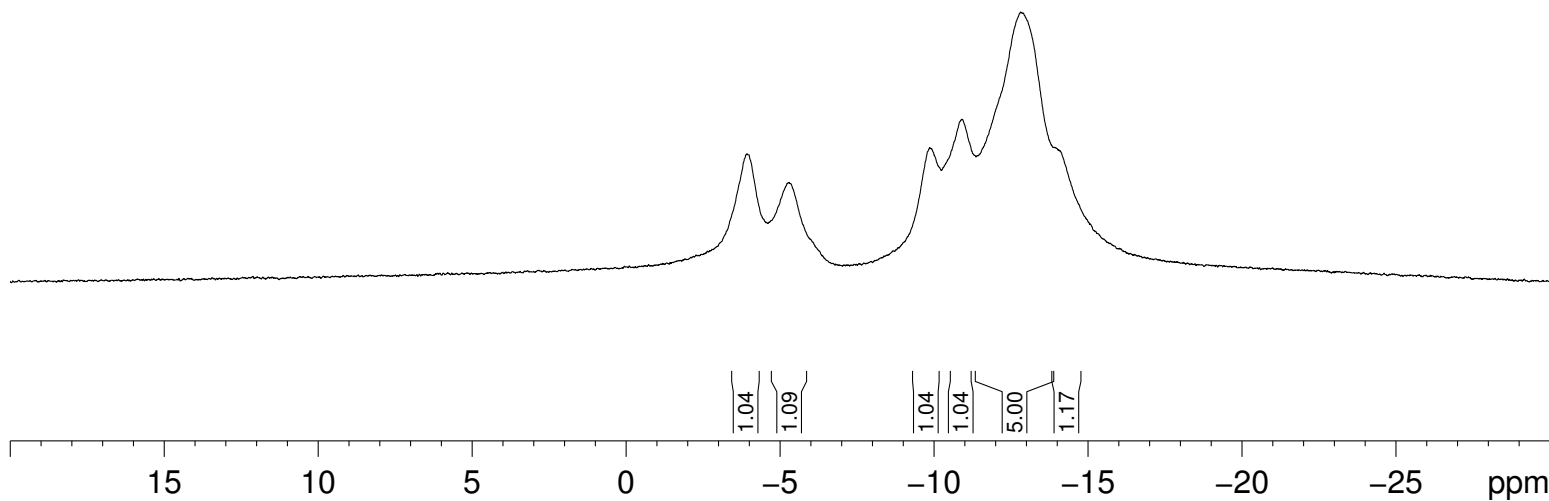

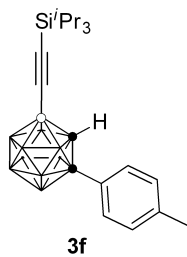

— — — -3.09  
 — — — -4.25  
 — — — -5.52  
  
 — — — -8.96  
 — — — -10.07  
 — — — -11.26  
 — — — -11.85  
 — — — -12.97  
 — — — -14.31

qyj-B-0366-CD2Cl2 (C)

```

NAME      qyj-B-0366-CD2Cl2 (C)
EXPNO     1
PROCNO    1
Date_     20141110
Time      16.34
INSTRUM   spect
PROBHD    5 mm PABBO BB-
PULPROG   zg30
TD        65536
SOLVENT   MeOD
NS        24
DS        0
SWH       25510.203 Hz
FIDRES    0.389255 Hz
AQ        1.2845556 sec
RG        645
DW        19.600 usec
DE        6.50 usec
TE        298.5 K
D1        5.00000000 sec
TD0       1
  
```

```

===== CHANNEL f1 =====
NUC1      11B
P1        7.60 usec
PL1       -3.00 dB
PL1W      55.13059616 W
SFO1      128.3968556 MHz
SI        32768
SF        128.3968865 MHz
WDW       EM
SSB       0
LB        3.00 Hz
GB        0
PC        1.40
  
```

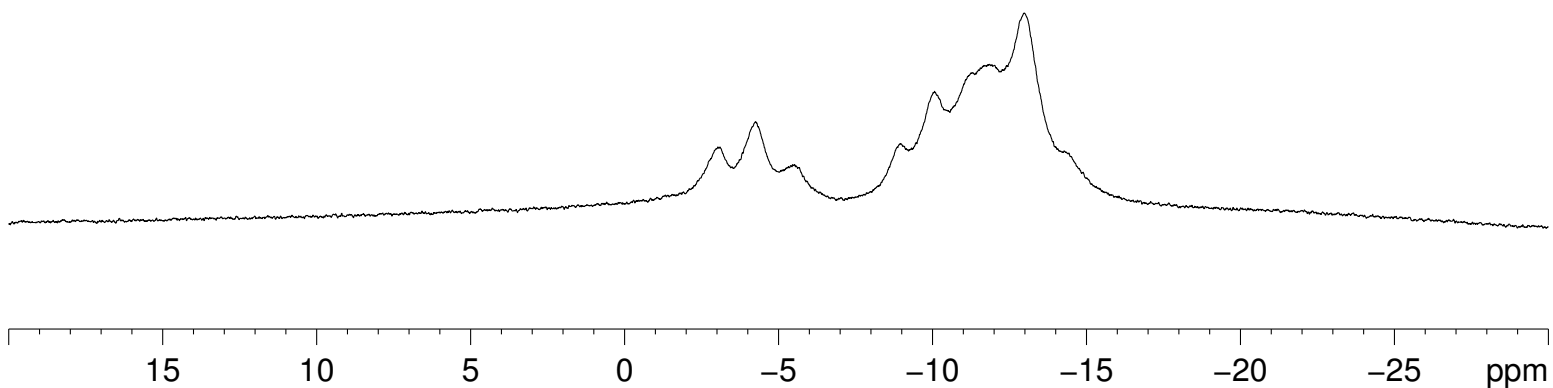

7.110  
7.054

5.320

4.221

2.316

1.094

qyj-H-0373-CD2CL2

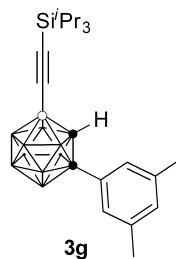

NAME qyj-H-0373-CD2CL2  
EXPNO 1  
PROCNO 1  
Date\_ 20141220  
Time 15.11  
INSTRUM spect  
PROBHD 5 mm PABBO BB-  
PULPROG zg30  
TD 65536  
SOLVENT CD2CL2  
NS 12  
DS 2  
SWH 8223.685 Hz  
FIDRES 0.125483 Hz  
AQ 3.9846387 sec  
RG 80.6  
DW 60.800 usec  
DE 6.50 usec  
TE 313.1 K  
D1 1.00000000 sec  
TD0 1

===== CHANNEL f1 =====  
NUC1 1H  
P1 14.00 usec  
PL1 -1.00 dB  
PL1W 13.56617069 W  
SFO1 400.1924713 MHz  
SI 32768  
SF 400.1900203 MHz  
WDW EM  
SSB 0  
LB 0.30 Hz  
GB 0  
PC 1.00

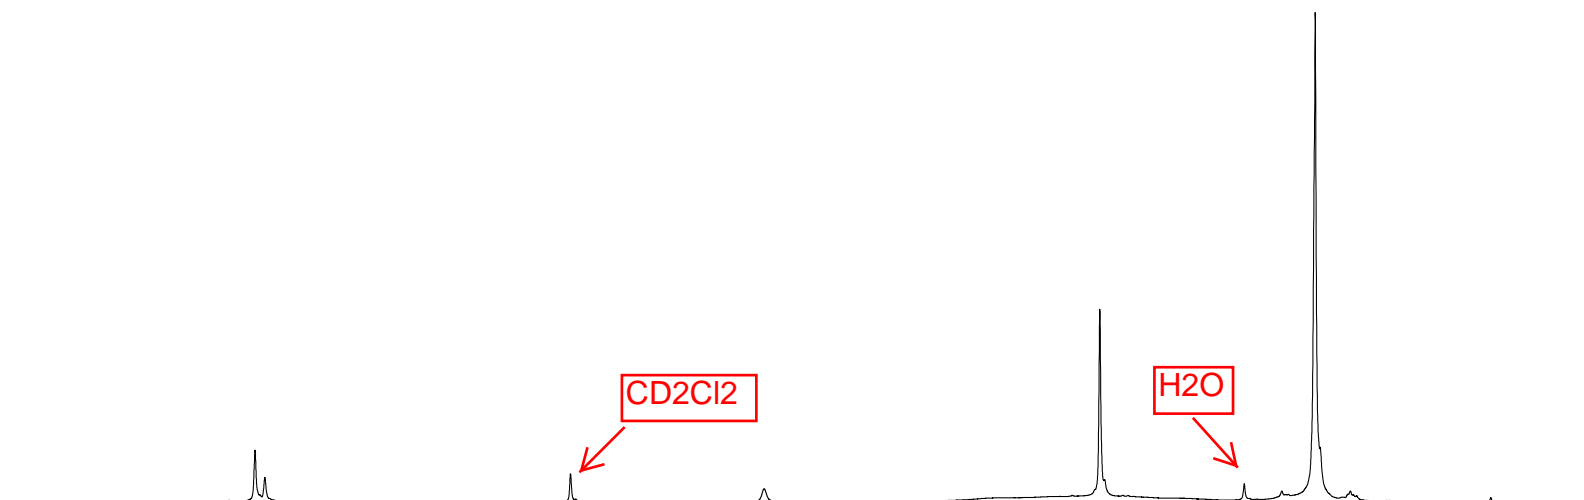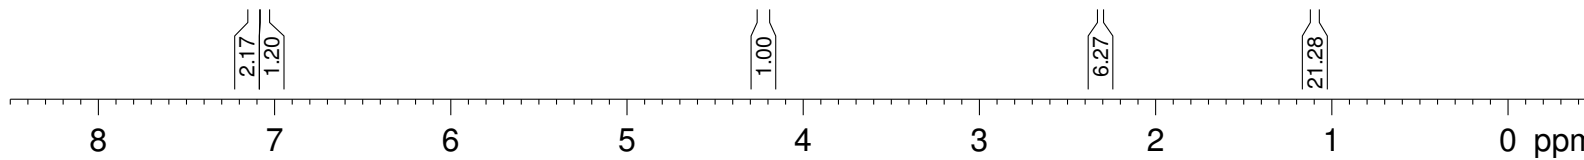

139.29  
133.48  
132.09  
125.91

77.51

62.40  
54.38  
54.11  
53.84  
53.57  
53.30

21.41  
18.86  
11.76

qyj-C-0373-CD2CL2

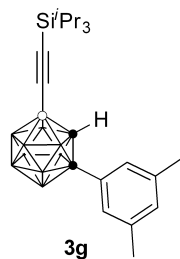

NAME qyj-C-0373-CD2CL2  
EXPNO 1  
PROCNO 1  
Date\_ 20141220  
Time 15.14  
INSTRUM spect  
PROBHD 5 mm PABBO BB-  
PULPROG zgpg30  
TD 65536  
SOLVENT CD2C12  
NS 320  
DS 4  
SWH 24038.461 Hz  
FIDRES 0.366798 Hz  
AQ 1.3631988 sec  
RG 181  
DW 20.800 usec  
DE 6.50 usec  
TE 313.3 K  
D1 2.00000000 sec  
D11 0.03000000 sec  
TD0 1

===== CHANNEL f1 =====  
NUC1 13C  
P1 9.90 usec  
PL1 -2.00 dB  
PL1W 55.33689499 W  
SFO1 100.6379183 MHz

===== CHANNEL f2 =====  
CPDPRG2 waltz16  
NUC2 1H  
PCPD2 90.00 usec  
PL2 -1.00 dB  
PL12 15.16 dB  
PL13 18.62 dB  
PL2W 13.56617069 W  
PL12W 0.32844096 W  
PL13W 0.14806664 W  
SFO2 400.1916008 MHz  
SI 32768  
SF 100.6278015 MHz  
WDW EM  
SSB 0  
LB 1.00 Hz  
GB 0  
PC 1.40

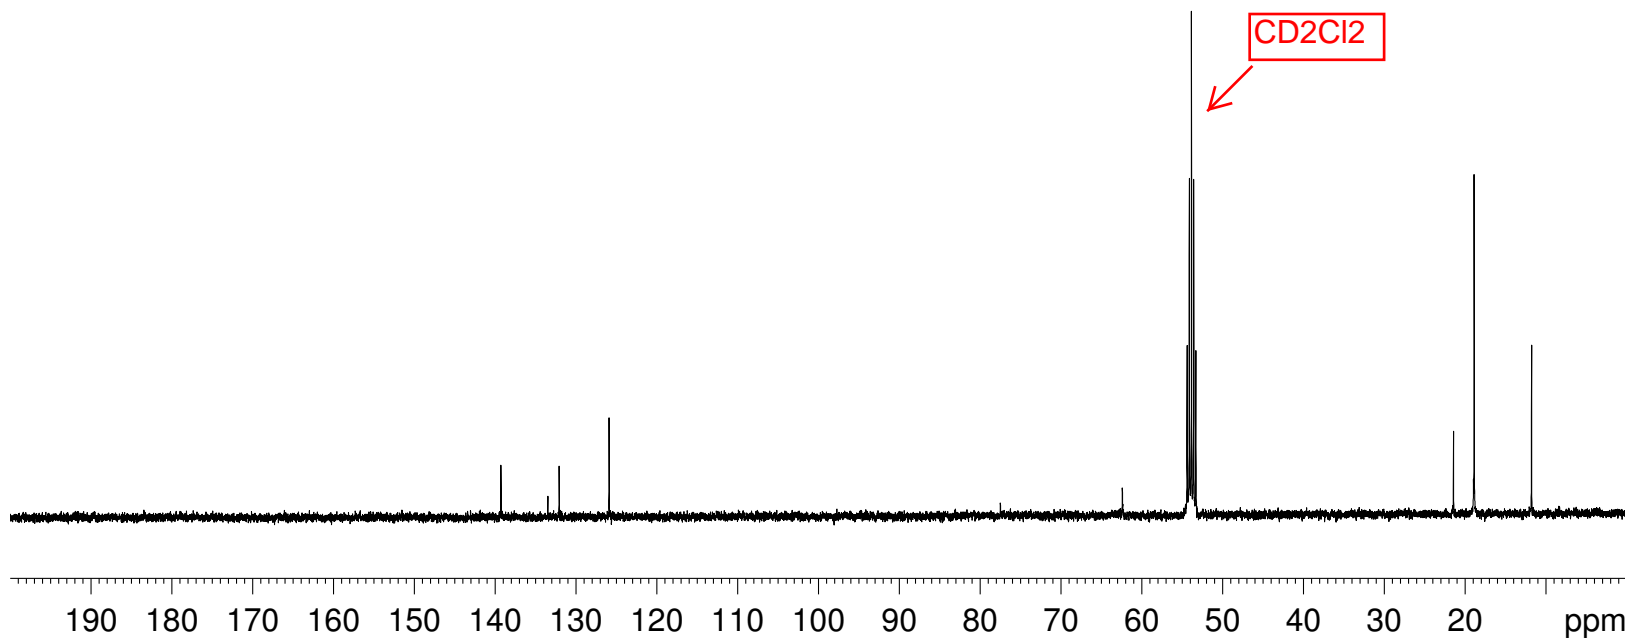

qyj-B-0373-CD2CL2

— -2.93  
— -4.04  
  
— -8.72  
— -9.76  
  
— -11.77  
— -13.11

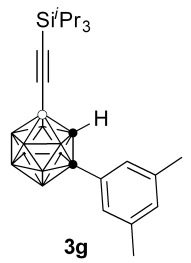

```
NAME      qyj-B-0373-CD2CL2
EXPNO     1
PROCNO    1
Date_     20141220
Time      15.34
INSTRUM   spect
PROBHD    5 mm PABBO BB-
PULPROG   zgdc
TD        65536
SOLVENT   CD2CL2
NS        8
DS        0
SWH       25510.203 Hz
FIDRES    0.389255 Hz
AQ        1.2845556 sec
RG        406
DW        19.600 usec
DE        6.50 usec
TE        313.4 K
D1        5.00000000 sec
D11       0.03000000 sec
TD0       1
```

```
===== CHANNEL f1 =====
NUC1      11B
P1        7.60 usec
PL1       -3.00 dB
PL1W      55.13059616 W
SFO1      128.3968556 MHz
```

```
===== CHANNEL f2 =====
CPDPRG2   waltz16
NUC2      1H
PCPD2     90.00 usec
PL2       -1.00 dB
PL12      15.16 dB
PL2W      13.56617069 W
PL12W     0.32844096 W
SFO2      400.1916008 MHz
SI        32768
SF        128.3968847 MHz
WDW       EM
SSB       0
LB        3.00 Hz
GB        0
PC        1.40
```

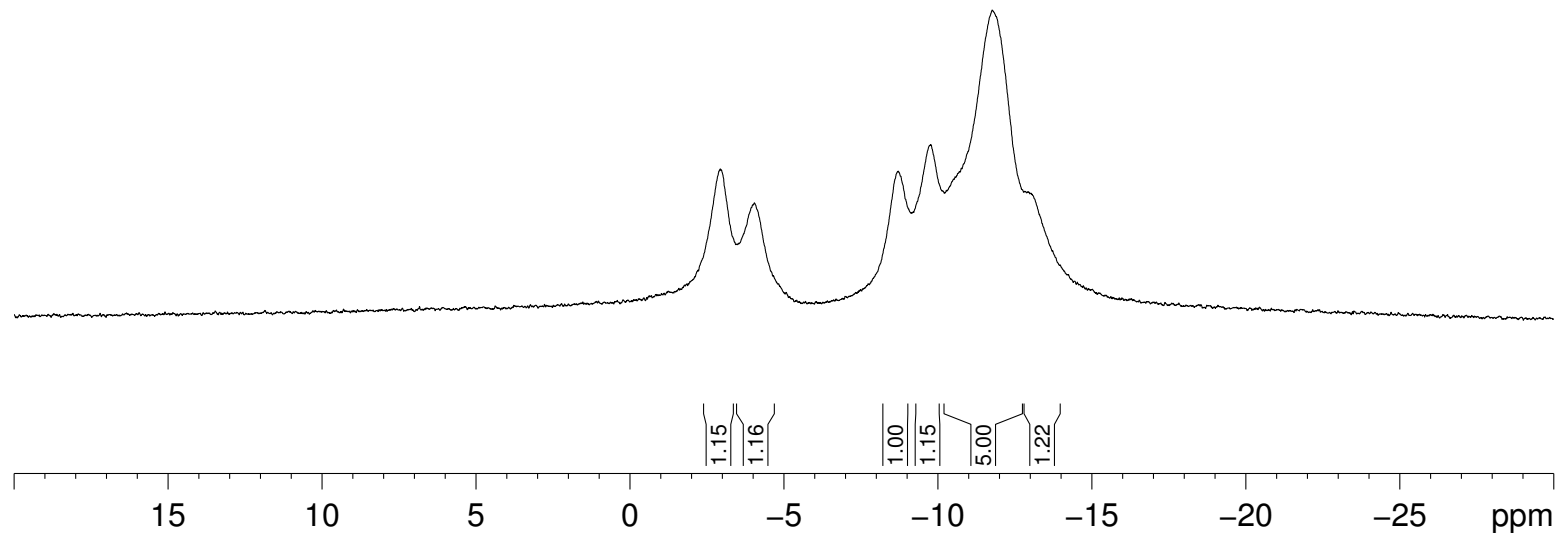

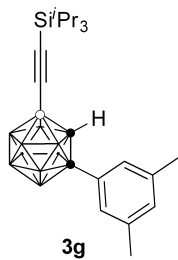

— — -2.81  
 — — -3.97  
 — — -5.06  
  
 — — -8.55  
 — — -9.72  
 — — -10.84  
 — — -11.53  
 — — -12.68  
 — — -14.20

qyj-B-0373-CD2CL2 (C)

```

NAME      qyj-B-0373-CD2CL2 (C)
EXPNO     1
PROCNO    1
Date_     20141220
Time      15.36
INSTRUM   spect
PROBHD    5 mm PABBO BB-
PULPROG   zg30
TD         65536
SOLVENT   CD2CL2
NS         24
DS         0
SWH       38461.539 Hz
FIDRES    0.586877 Hz
AQ         0.8520180 sec
RG         406
DW         13.000 usec
DE         6.50 usec
TE         313.1 K
D1         5.00000000 sec
TD0        1
  
```

```

===== CHANNEL f1 =====
NUC1      11B
P1         7.60 usec
PL1       -3.00 dB
PL1W      55.13059616 W
SFO1      128.3968556 MHz
SI         32768
SF         128.3969425 MHz
WDW        EM
SSB         0
LB         3.00 Hz
GB         0
PC         1.40
  
```

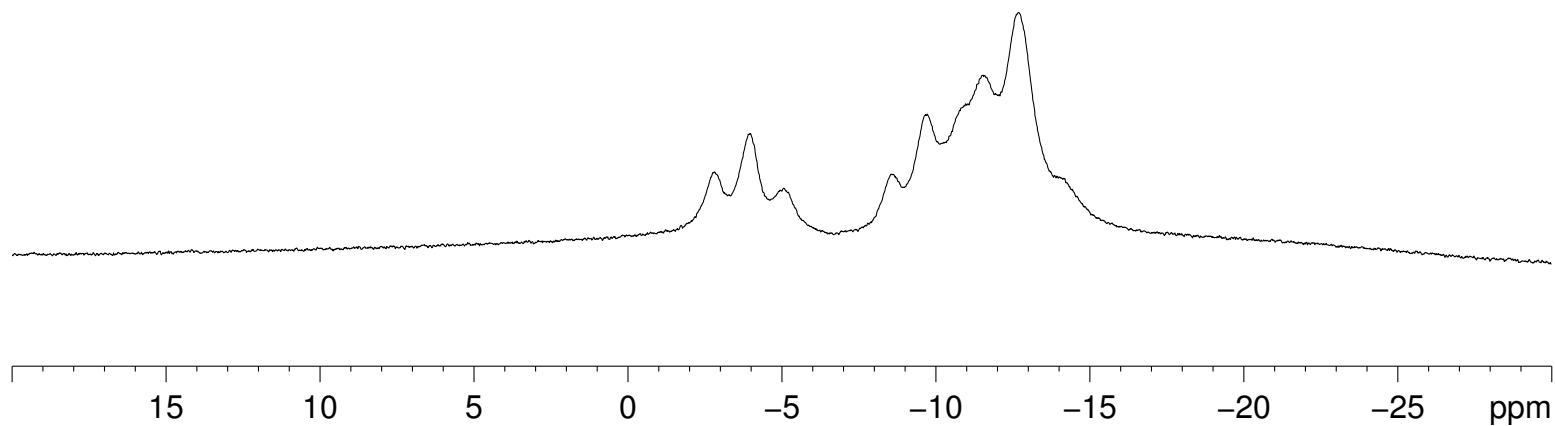



7.653  
7.640

5.320

4.274

1.081

qyj-H-0365-CD2Cl2

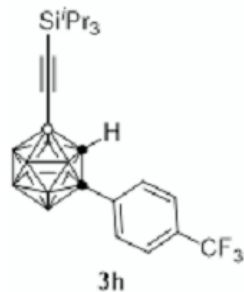

NAME qyj-H-0365-CD2Cl2  
EXPNO 1  
PROCNO 1  
Date\_ 20141111  
Time 10.24  
INSTRUM spect  
PROBHD 5 mm PABBO BB-  
PULPROG zg30  
TD 65536  
SOLVENT CD2Cl2  
NS 12  
DS 2  
SWH 8223.685 Hz  
FIDRES 0.125483 Hz  
AQ 3.9846387 sec  
RG 57  
DW 60.800 usec  
DE 6.50 usec  
TE 298.3 K  
D1 1.00000000 sec  
TD0 1

===== CHANNEL f1 =====  
NUC1 1H  
P1 14.00 usec  
PL1 -1.00 dB  
PL1W 13.56617069 W  
SFO1 400.1924713 MHz  
SI 32768  
SF 400.1900212 MHz  
WDW EM  
SSB 0  
LB 0.30 Hz  
GB 0  
PC 1.00

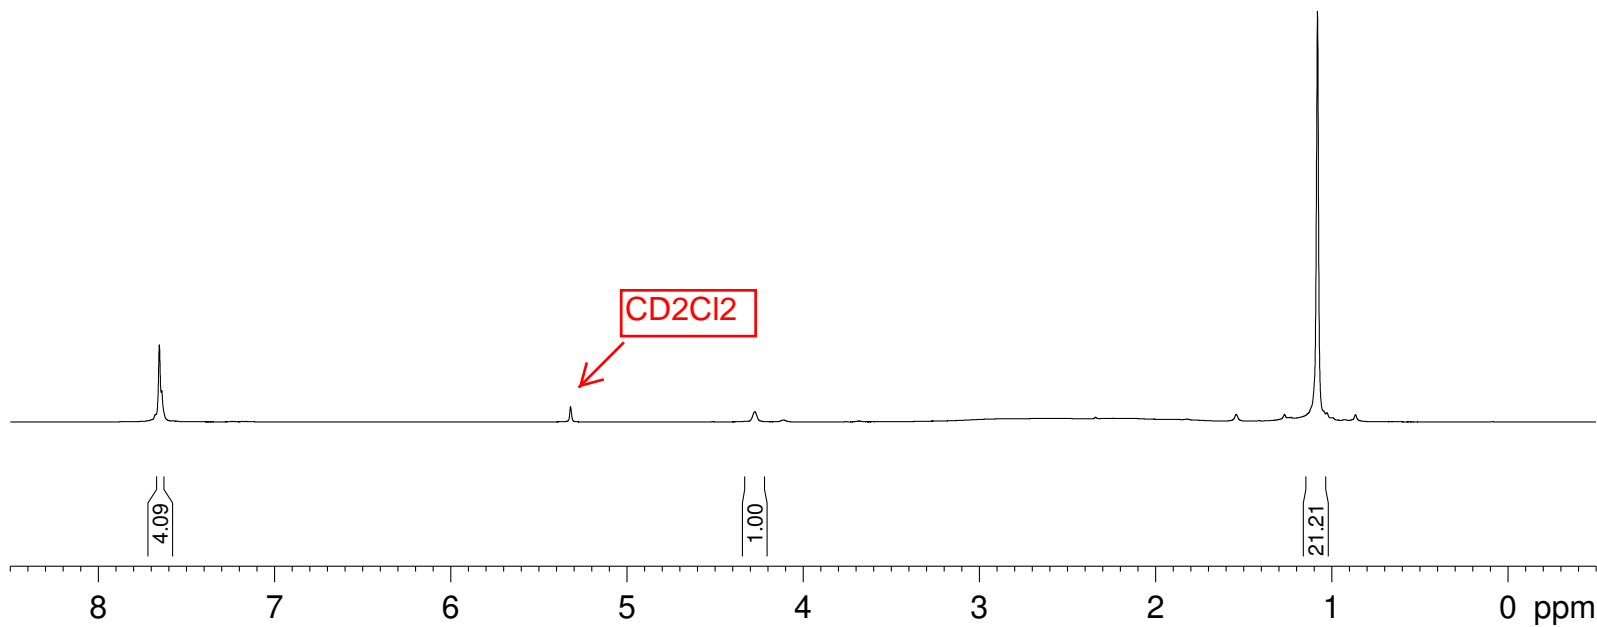

136.94  
132.52  
132.20  
128.33  
126.14  
126.10  
126.06  
126.03  
124.86  
122.15

77.47  
77.15  
76.84  
74.91

61.34

29.85

18.73

11.27

qyj-C-6-cf3-cdcl3

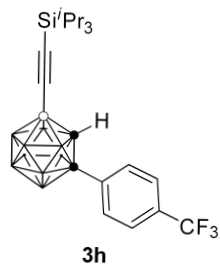

Current Data Parameters  
NAME qyj-C-6-cf3-cdcl3  
EXPNO 1  
PROCNO 1

F2 - Acquisition Parameters  
Date\_ 20160401  
Time 17.00 h  
INSTRUM spect  
PROBHD Z108618\_0257 (  
PULPROG zgpg30  
TD 65536  
SOLVENT CDCl3  
NS 1261  
DS 4  
SWH 29761.904 Hz  
FIDRES 0.454131 Hz  
AQ 1.1010048 sec  
RG 144  
DW 16.800 usec  
DE 6.50 usec  
TE 294.3 K  
D1 2.0000000 sec  
D11 0.0300000 sec  
TD0 1  
SFO1 100.6479773 MHz  
NUC1 13C  
P1 9.50 usec  
PLW1 55.3400015 W  
SFO2 400.2316009 MHz  
NUC2 1H  
CPDPRG[2] waltz16  
PCPD2 90.00 usec  
PLW2 13.5600042 W  
PLW12 0.27428001 W  
PLW13 0.13796000 W

F2 - Processing parameters  
SI 32768  
SF 100.6379006 MHz  
WDW EM  
SSB 0  
LB 1.00 Hz  
GB 0  
PC 1.40

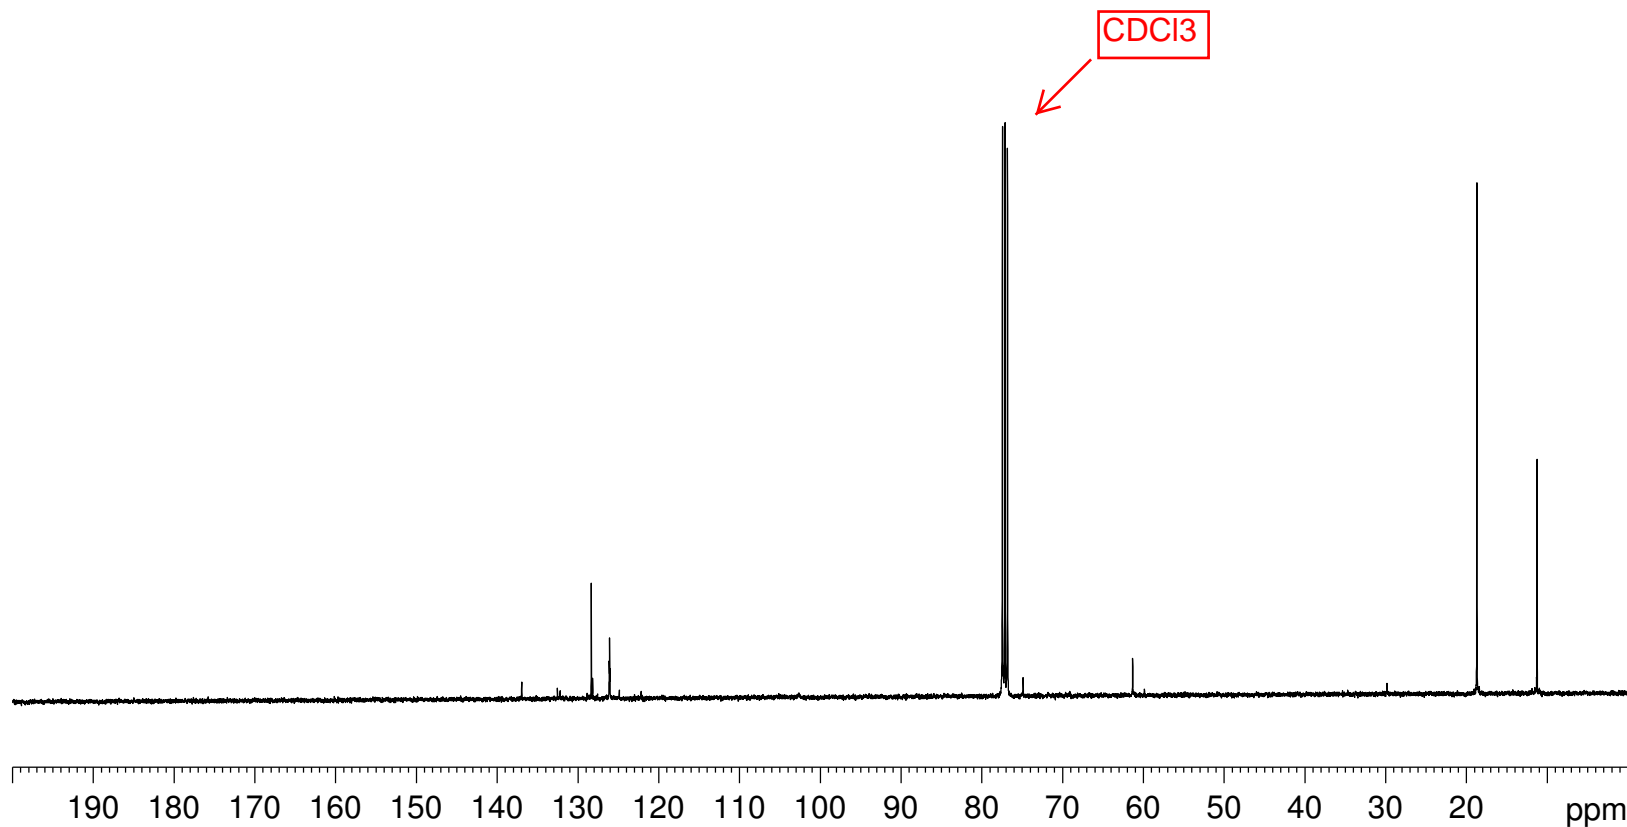

qyj-B-0365-CD2Cl2

NAME qyj-B-0365-CD2Cl2  
EXPNO 1  
PROCNO 1  
Date\_ 20141111  
Time 10.16  
INSTRUM spect  
PROBHD 5 mm PABBO BB-  
PULPROG zgdc  
TD 65536  
SOLVENT CDCl3  
NS 12  
DS 0  
SWH 25510.203 Hz  
FIDRES 0.389255 Hz  
AQ 1.2845556 sec  
RG 287  
DW 19.600 usec  
DE 6.50 usec  
TE 298.6 K  
D1 5.0000000 sec  
D11 0.0300000 sec  
TD0 1

===== CHANNEL f1 =====  
NUC1 11B  
P1 7.60 usec  
PL1 -3.00 dB  
PL1W 55.13059616 W  
SFO1 128.3968556 MHz

===== CHANNEL f2 =====  
CPDPRG2 waltz16  
NUC2 1H  
PCPD2 90.00 usec  
PL2 -1.00 dB  
PL12 15.16 dB  
PL2W 13.56617069 W  
PL12W 0.32844096 W  
SFO2 400.1916008 MHz  
SI 32768  
SF 128.3969291 MHz  
WDW EM  
SSB 0  
LB 3.00 Hz  
GB 0  
PC 1.40

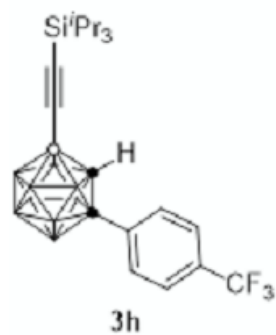

— -2.95  
— -3.60  
  
— -9.40  
  
— -11.89  
— -13.04

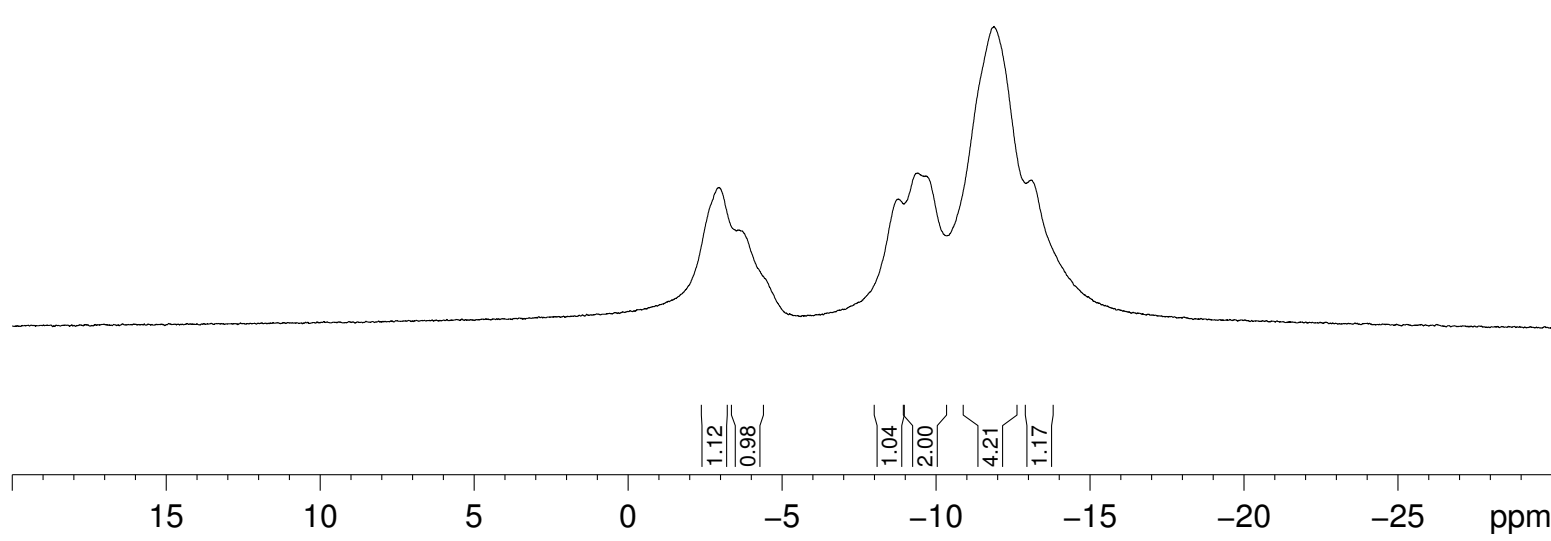

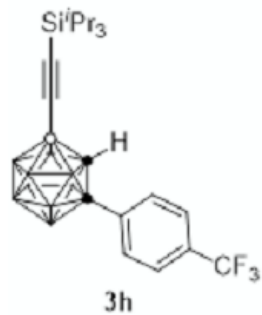

— -2.05  
 — -2.92  
 — -7.79  
 — -8.90  
 — -10.87  
 — -12.08  
 — -13.42

qyj-B-0365-CD2Cl2 (C

```

NAME      qyj-B-0365-CD2Cl2 (C)
EXPNO     1
PROCNO    1
Date_     20141111
Time      10.19
INSTRUM   spect
PROBHD    5 mm PABBO BB-
PULPROG   zg30
TD         65536
SOLVENT   CDCl3
NS         16
DS         0
SWH       25510.203 Hz
FIDRES    0.389255 Hz
AQ         1.2845556 sec
RG         406
DW         19.600 usec
DE         6.50 usec
TE         298.1 K
D1         5.00000000 sec
TD0        1
  
```

```

===== CHANNEL f1 =====
NUC1      11B
P1         7.60 usec
PL1       -3.00 dB
PL1W      55.13059616 W
SFO1      128.3968556 MHz
SI         32768
SF         128.3968865 MHz
WDW        EM
SSB         0
LB          3.00 Hz
GB          0
PC          1.40
  
```

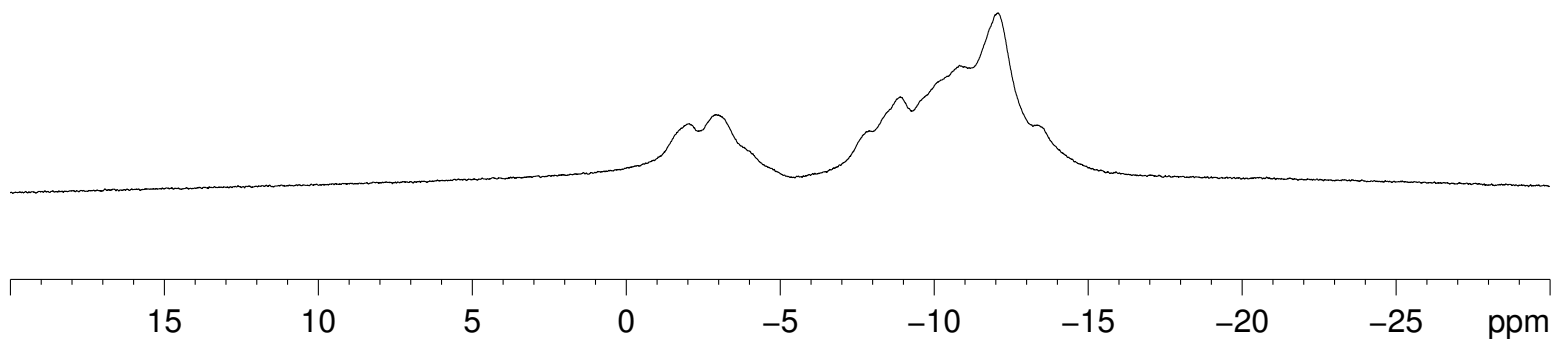

7.476  
7.454  
7.360  
7.338

5.320

4.201

1.074

qyj-H-0376-CD2C12

Bruker Advance III 400

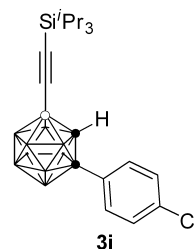

NAME qyj-H-0376-CD2C12  
EXPNO 1  
PROCNO 1  
Date\_ 20141222  
Time 17.25  
INSTRUM spect  
PROBHD 5 mm PADUL 13C  
PULPROG zg  
TD 65536  
SOLVENT CD2C12  
NS 14  
DS 0  
SWH 10000.000 Hz  
FIDRES 0.152588 Hz  
AQ 3.2768500 sec  
RG 80.6  
DW 50.000 usec  
DE 6.50 usec  
TE 296.0 K  
D1 1.00000000 sec  
TD0 1

===== CHANNEL f1 =====  
NUC1 1H  
P1 14.83 usec  
PL1 0.00 dB  
PL1W 8.31434441 W  
SFO1 400.1318000 MHz  
SI 65536  
SF 400.1300143 MHz  
WDW EM  
SSB 0  
LB 0.30 Hz  
GB 0  
PC 1.00

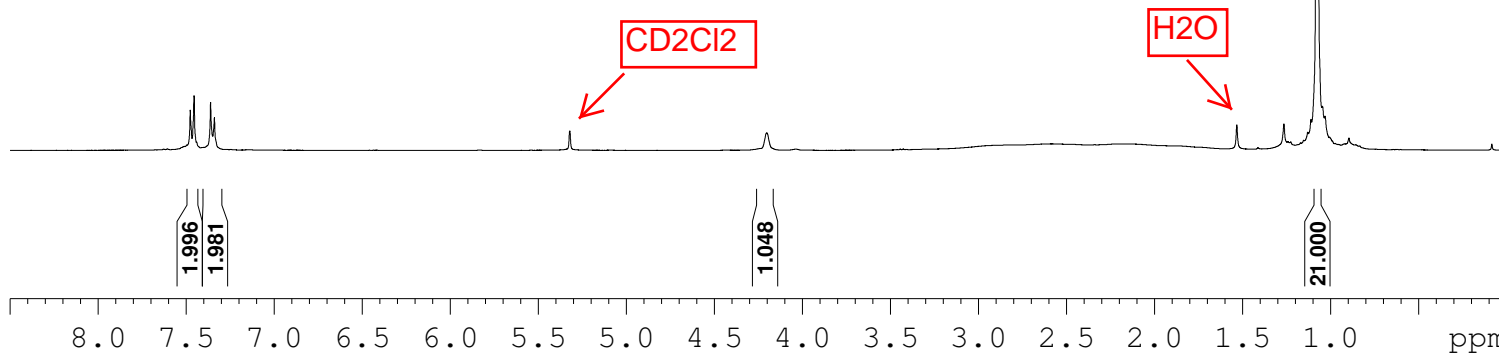

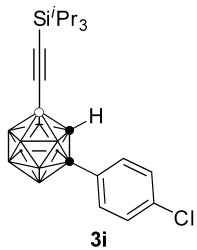

— 136.888  
 — 132.027  
 — 129.661  
 — 129.425

— 76.088

— 62.467  
 — 54.381  
 — 54.110  
 — 53.840  
 — 53.570  
 — 53.299

— 18.755

— 11.570

qyj-C-0376-CD2C12

Bruker Advance III 400

```

NAME      qyj-C-0376-CD2C12
EXPNO     1
PROCNO    1
Date_     20141222
Time      17.29
INSTRUM   spect
PROBHD    5 mm PADUL 13C
PULPROG   zgdc
TD         131072
SOLVENT   CD2C12
NS         1106
DS         0
SWH       29761.904 Hz
FIDRES    0.227065 Hz
AQ         2.2020595 sec
RG         203
DW         16.800 usec
DE         6.50 usec
TE         296.2 K
D1         1.00000000 sec
D11        0.03000000 sec
TD0        1
  
```

```

===== CHANNEL f1 =====
NUC1      13C
P1         9.68 usec
PL1        -0.60 dB
PL1W      41.24164963 W
SFO1      100.6227690 MHz
  
```

```

===== CHANNEL f2 =====
CPDPRG2   waltz16
NUC2       1H
PCPD2      90.00 usec
PL2         0.00 dB
PL12       15.66 dB
PL2W       8.31434441 W
PL12W      0.22585411 W
SFO2       400.1320007 MHz
SI          131072
SF          100.6127258 MHz
WDW         EM
SSB         0
LB          1.00 Hz
GB          0
PC          1.40
  
```

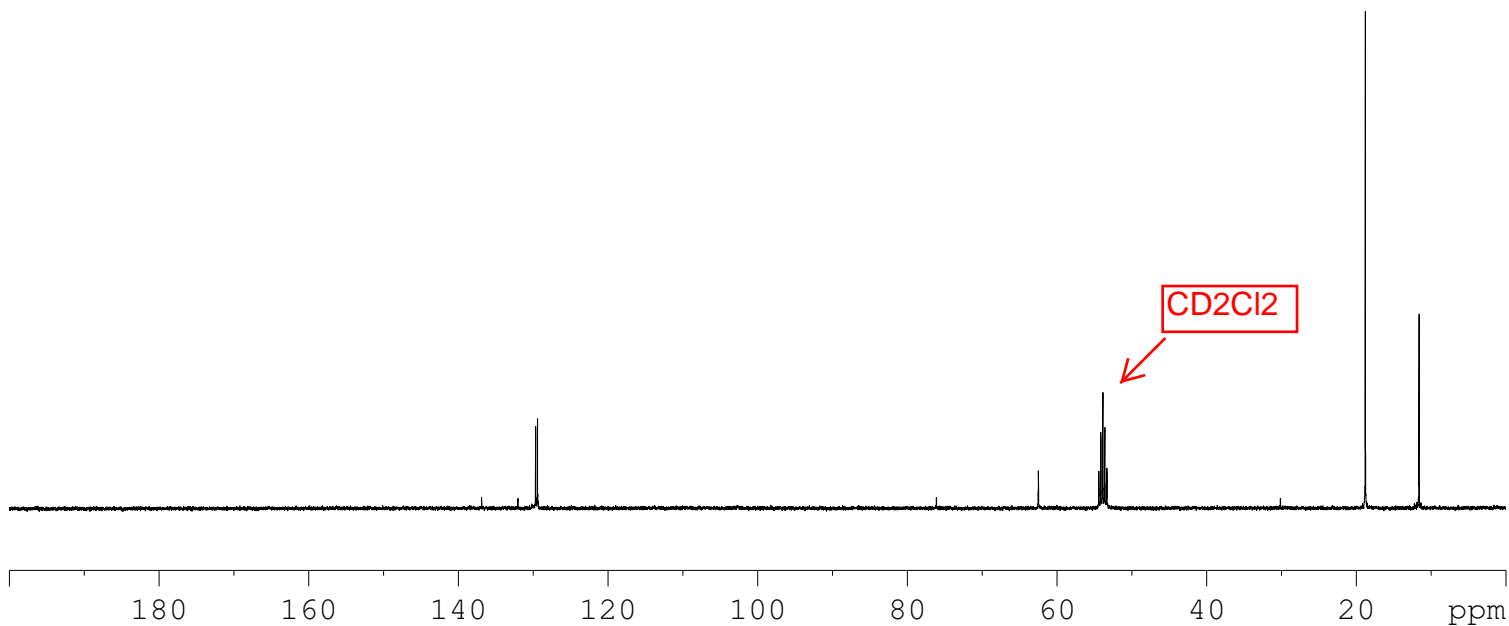

qyj-B-0376-1-CD2CL2

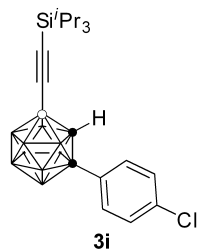

— -2.70  
— -3.77  
— -8.60  
— -9.61  
— -11.64

NAME qyj-B-0376-1-CD2CL2  
EXPNO 1  
PROCNO 1  
Date\_ 20141222  
Time 18.44  
INSTRUM spect  
PROBHD 5 mm PABBO BB-  
PULPROG zgdc  
TD 65536  
SOLVENT CDCl3  
NS 8  
DS 0  
SWH 25510.203 Hz  
FIDRES 0.389255 Hz  
AQ 1.2845556 sec  
RG 406  
DW 19.600 usec  
DE 6.50 usec  
TE 298.0 K  
D1 5.00000000 sec  
D11 0.03000000 sec  
TD0 1

==== CHANNEL f1 =====  
NUC1 11B  
P1 7.60 usec  
PL1 -3.00 dB  
PL1W 55.13059616 W  
SFO1 128.3968556 MHz

==== CHANNEL f2 =====  
CPDPRG2 waltz16  
NUC2 1H  
PCPD2 90.00 usec  
PL2 -1.00 dB  
PL12 15.16 dB  
PL2W 13.56617069 W  
PL12W 0.32844096 W  
SFO2 400.1916008 MHz  
SI 32768  
SF 128.3968847 MHz  
WDW EM  
SSB 0  
LB 3.00 Hz  
GB 0  
PC 1.40

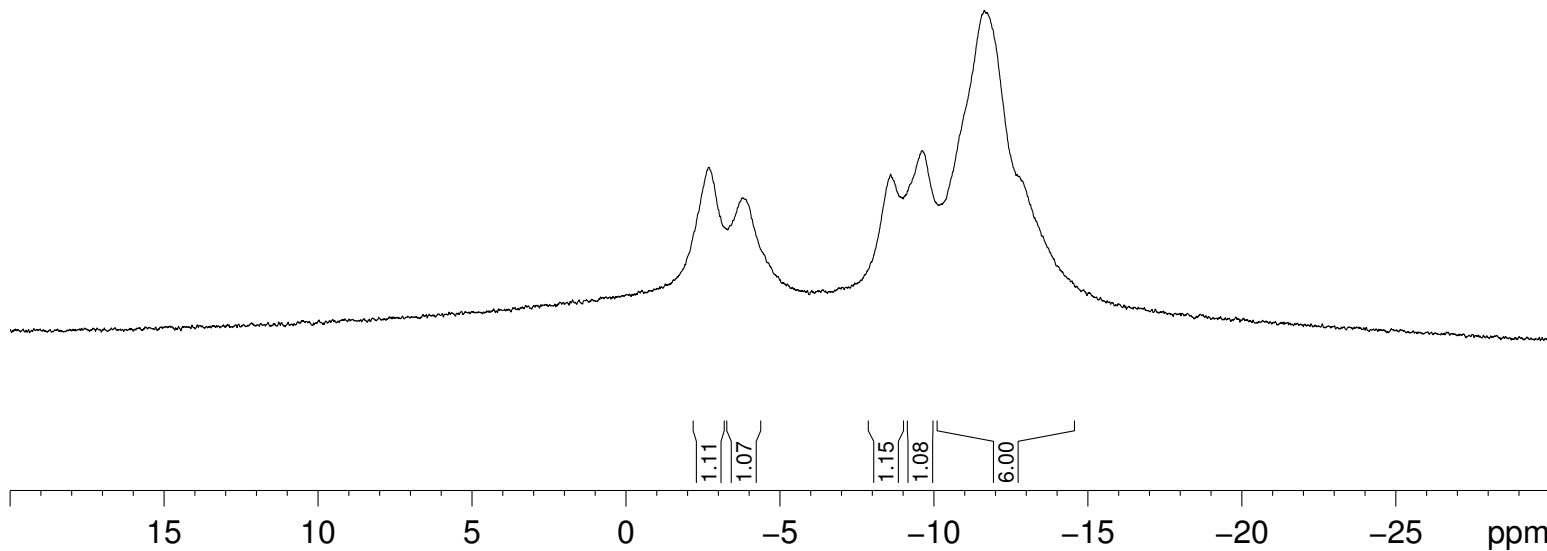

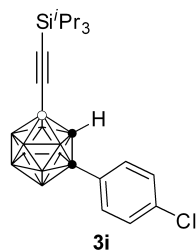

| -2.59  
 | -3.71  
 | -4.77  
  
 | -8.54  
 | -9.58  
 | -10.80  
 | -11.48  
 | -12.61  
 | -14.01

qyj-B-0376-1-CD2CL2 (C)

```

NAME      qyj-B-0376-1-CD2CL2 (C)
EXPNO     1
PROCNO    1
Date_     20141222
Time      18.46
INSTRUM   spect
PROBHD    5 mm PABBO BB-
PULPROG   zg30
TD        65536
SOLVENT   CDCl3
NS        28
DS        0
SWH       38461.539 Hz
FIDRES    0.586877 Hz
AQ        0.8520180 sec
RG        812
DW        13.000 usec
DE        6.50 usec
TE        297.9 K
D1        5.00000000 sec
TD0       1
  
```

```

===== CHANNEL f1 =====
NUC1      11B
P1        7.60 usec
PL1       -3.00 dB
PL1W      55.13059616 W
SFO1      128.3968556 MHz
SI        32768
SF        128.3969425 MHz
WDW       EM
SSB       0
LB        3.00 Hz
GB        0
PC        1.40
  
```

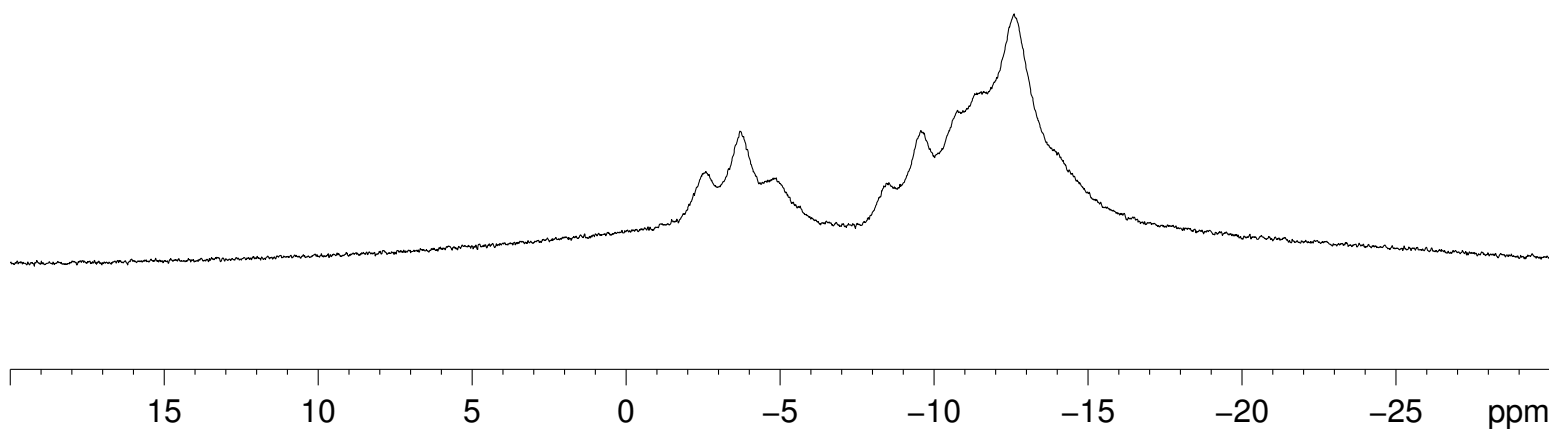



7.458  
7.436

6.860  
6.838

5.320  
5.318

4.157

3.800

1.544

1.079  
1.072

qyj-H-0364-cd2c12

Bruker Advance III 400

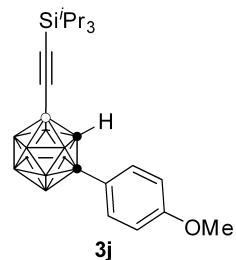

```
NAME      qyj-H-0364-cd2c12
EXPNO     1
PROCNO    1
Date_     20141108
Time      13.56
INSTRUM   spect
PROBHD    5 mm PADUL 13C
PULPROG   zg30
TD        65536
SOLVENT   CD2C12
NS        16
DS        2
SWH       8223.685 Hz
FIDRES    0.125483 Hz
AQ        3.9846387 sec
RG        203
DW        60.800 usec
DE        6.50 usec
TE        296.7 K
D1        1.00000000 sec
TD0       1
```

```
===== CHANNEL f1 =====
NUC1      1H
P1        14.83 usec
PL1       0.00 dB
PL1W      8.31434441 W
SFO1      400.1324710 MHz
SI        32768
SF        400.1300147 MHz
WDW       EM
SSB       0
LB        0.30 Hz
GB        0
PC        1.00
```

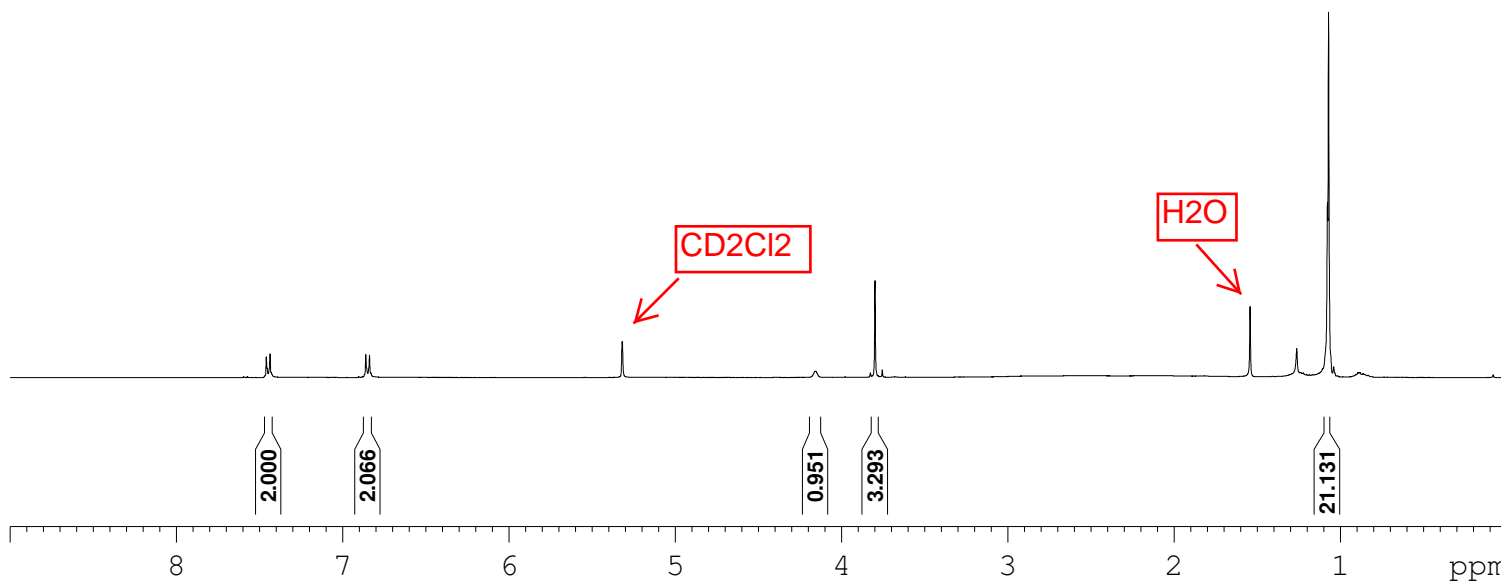

161.435

129.842

125.440

114.415

77.471

63.227

55.899

54.380

54.109

53.839

53.568

53.298

30.105

18.757

11.581

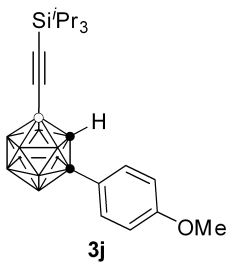

qyj-C-0364-cd2cl2

Bruker Avance III 400

```

NAME      qyj-C-0364-cd2cl2
EXPNO     1
PROCNO    1
Date_     20141108
Time      14.00
INSTRUM   spect
PROBHD    5 mm PADUL 13C
PULPROG   zgdc
TD         131072
SOLVENT   CD2C12
NS         568
DS         0
SWH        29761.904 Hz
FIDRES     0.227065 Hz
AQ         2.2020595 sec
RG         203
DW         16.800 usec
DE         6.50 usec
TE         296.9 K
D1         1.00000000 sec
D11        0.03000000 sec
TD0        1

```

```

===== CHANNEL f1 =====
NUC1       13C
P1         9.68 usec
PL1        -0.60 dB
PL1W       41.24164963 W
SFO1       100.6227690 MHz

```

```

===== CHANNEL f2 =====
CPDPRG2    waltz16
NUC2       1H
PCPD2      90.00 usec
PL2         0.00 dB
PL12       15.66 dB
PL2W       8.31434441 W
PL12W      0.22585411 W
SFO2       400.1320007 MHz
SI         131072
SF         100.6127257 MHz
WDW        EM
SSB        0
LB         1.00 Hz
GB         0
PC         1.40

```

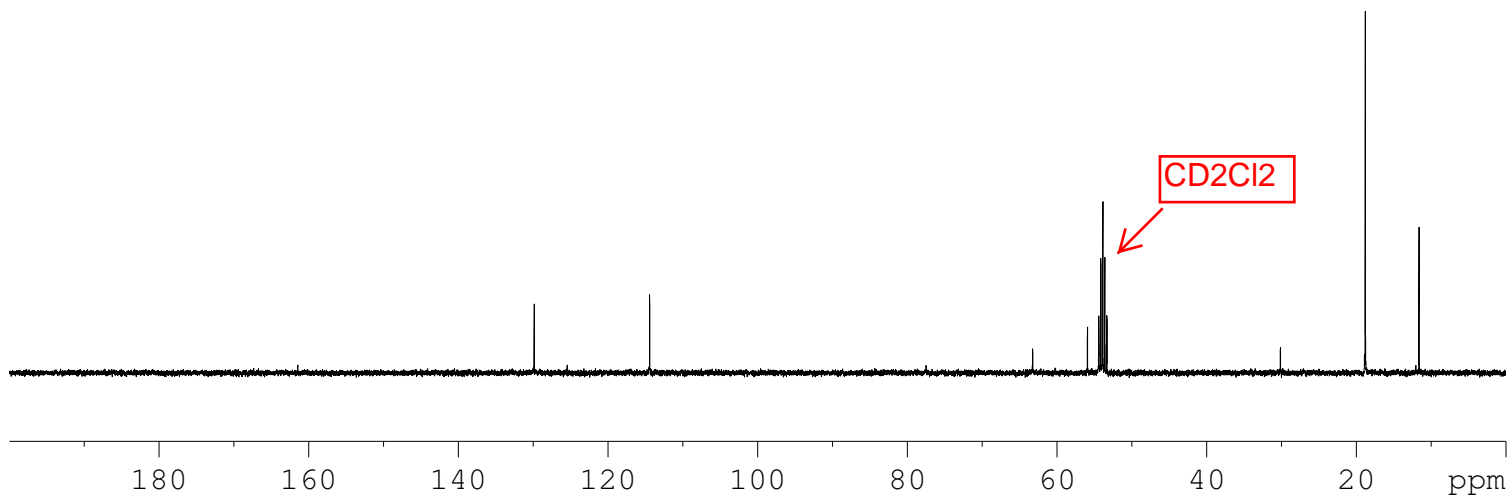

— -2.98  
 — -4.61  
 — -9.09  
 — -10.16  
 — -12.01

qyj-B-0364-CD2C12

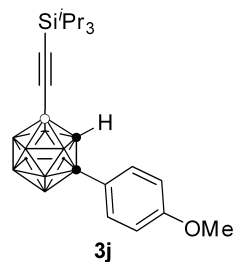

```

NAME      qyj-B-0364-CD2C12
EXPNO     1
PROCNO    1
Date_     20141108
Time      15.38
INSTRUM   spect
PROBHD    5 mm PABBO BB-
PULPROG   zgdc
TD        65536
SOLVENT   CDC13
NS        20
DS        0
SWH       25510.203 Hz
FIDRES    0.389255 Hz
AQ        1.2845556 sec
RG        406
DW        19.600 usec
DE        6.50 usec
TE        299.3 K
D1        5.0000000 sec
D11       0.0300000 sec
TD0       1
  
```

```

===== CHANNEL f1 =====
NUC1      11B
P1        7.60 usec
PL1       -3.00 dB
PL1W      55.13059616 W
SFO1      128.3968556 MHz
  
```

```

===== CHANNEL f2 =====
CPDPRG2   waltz16
NUC2      1H
PCPD2     90.00 usec
PL2       -1.00 dB
PL12      15.16 dB
PL2W      13.56617069 W
PL12W     0.32844096 W
SFO2      400.1916008 MHz
SI        32768
SF        128.3969291 MHz
WDW       EM
SSB       0
LB        3.00 Hz
GB        0
PC        1.40
  
```

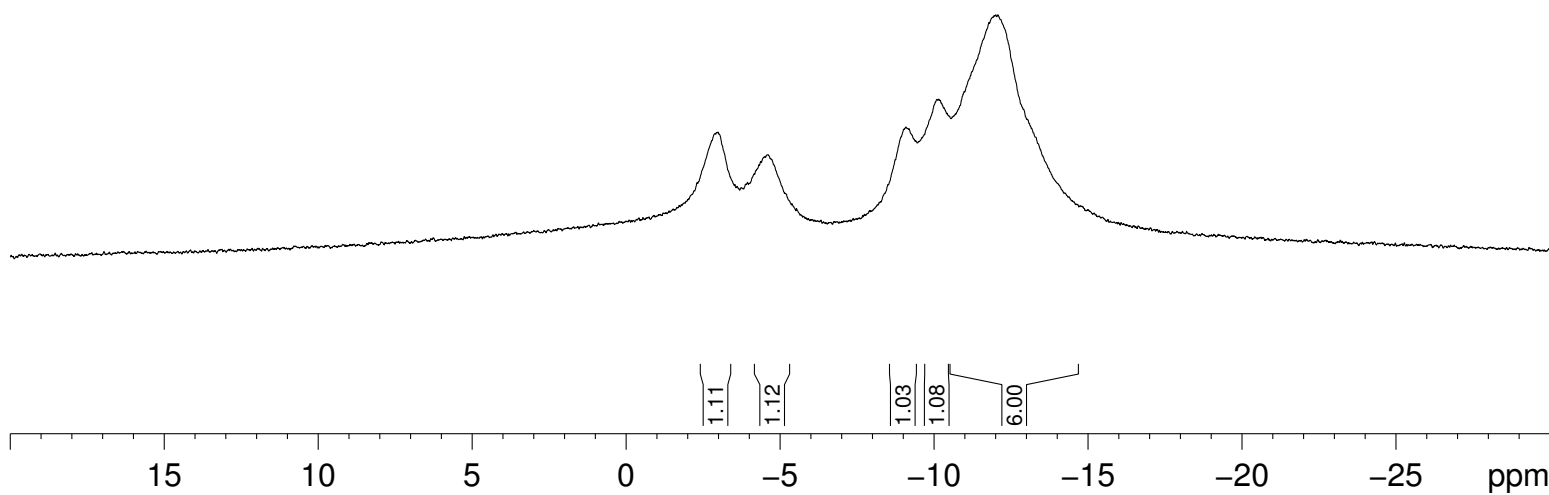

— -2.12  
 — -3.35  
 — -4.57  
  
 — -8.17  
 — -9.30  
 — -10.50  
 — -12.10

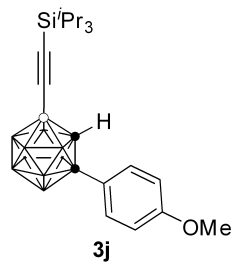

qyj-B-0364-CD2Cl2 (C)

```

NAME      qyj-B-0364-CD2Cl2 (C)
EXPNO     1
PROCNO    1
Date_     20141108
Time      15.41
INSTRUM   spect
PROBHD    5 mm PABBO BB-
PULPROG   zg30
TD         65536
SOLVENT   CDCl3
NS         40
DS         0
SWH       25510.203 Hz
FIDRES    0.389255 Hz
AQ         1.2845556 sec
RG         362
DW         19.600 usec
DE         6.50 usec
TE         298.8 K
D1         5.00000000 sec
TD0        1
  
```

```

===== CHANNEL f1 =====
NUC1      11B
P1        7.60 usec
PL1       -3.00 dB
PL1W      55.13059616 W
SFO1      128.3968556 MHz
SI         32768
SF         128.3968865 MHz
WDW        EM
SSB        0
LB         3.00 Hz
GB         0
PC         1.40
  
```

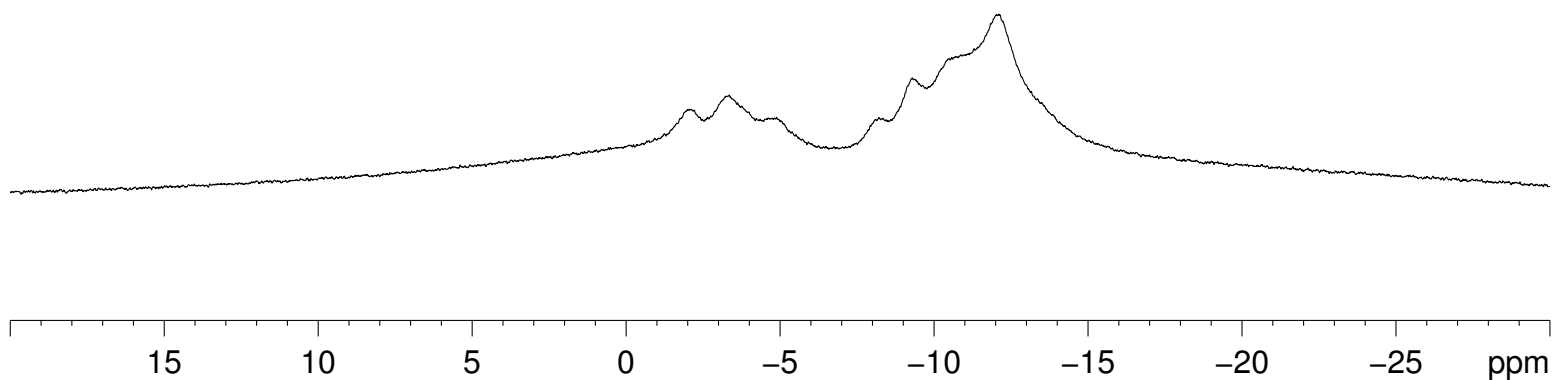

8.723  
8.701  
7.952  
7.934  
7.917  
7.874  
7.855  
7.626  
7.608  
7.588  
7.566  
7.547  
7.530  
7.468  
7.449  
7.430

5.320  
4.895

1.097

qyj-H-0367-cd2c12

Bruker Advance III 400

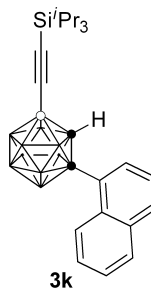

```

NAME      qyj-H-0367-cd2c12
EXPNO     1
PROCNO    1
Date_     20141113
Time      14.08
INSTRUM   spect
PROBHD    5 mm PADUL 13C
PULPROG   zg30
TD         65536
SOLVENT   CD2C12
NS         12
DS         2
SWH        8223.685 Hz
FIDRES     0.125483 Hz
AQ         3.9846387 sec
RG         203
DW         60.800 usec
DE         6.50 usec
TE         297.4 K
D1         1.00000000 sec
TD0        1
  
```

```

===== CHANNEL f1 =====
NUC1      1H
P1        14.83 usec
PL1       0.00 dB
PL1W      8.31434441 W
SFO1      400.1324710 MHz
SI         32768
SF         400.1300136 MHz
WDW        EM
SSB        0
LB         0.30 Hz
GB         0
PC         1.00
  
```

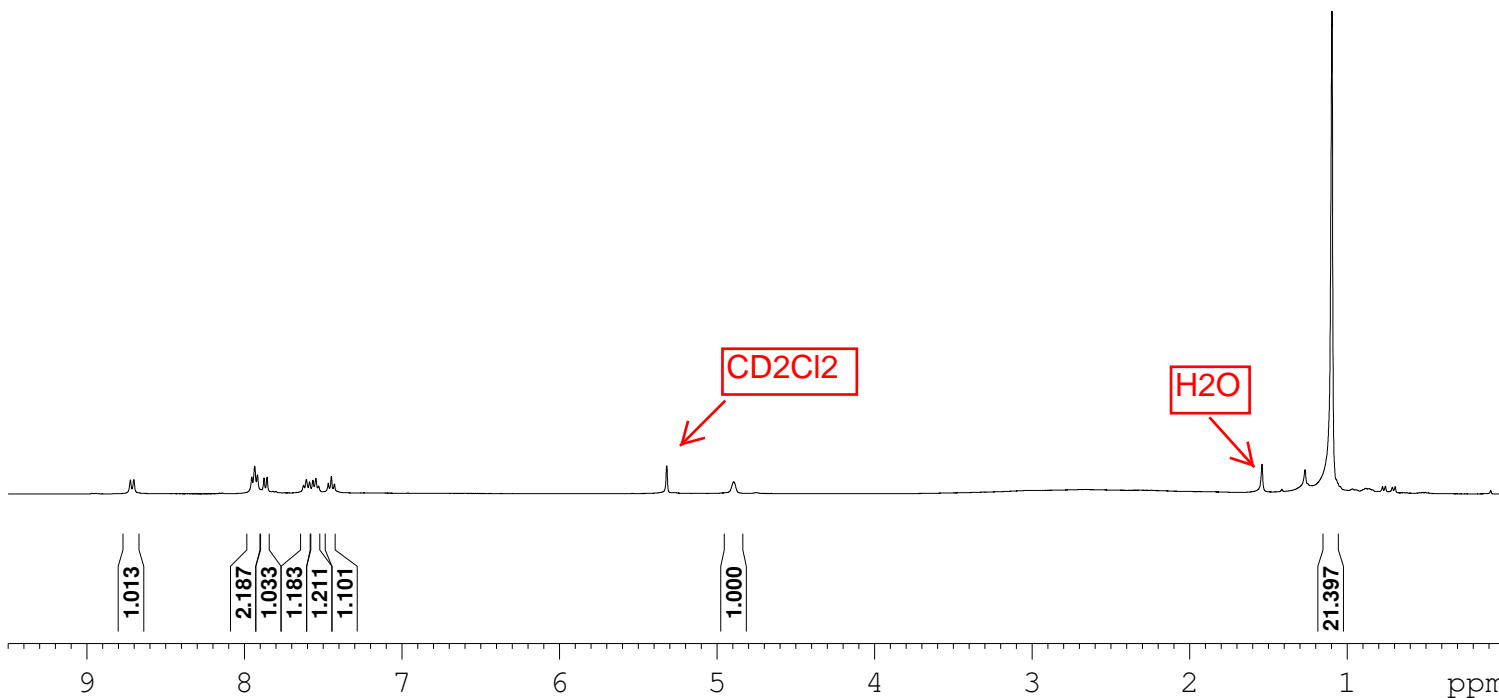

135.229  
132.357  
130.235  
129.137  
127.664  
126.547  
125.010  
124.607

78.020

63.533  
54.378  
54.111  
53.840  
53.568  
53.305

18.794

11.607

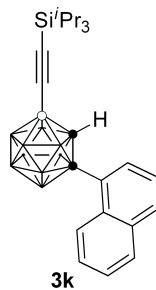

qyj-C-0367-cd2c12

Bruker Advance III 400

```

NAME      qyj-C-0367-cd2c12
EXPNO     1
PROCNO    1
Date_     20141115
Time      14.14
INSTRUM   spect
PROBHD    5 mm PADUL 13C
PULPROG   zgdc
TD         131072
SOLVENT   CD2C12
NS         360
DS         0
SWH       29761.904 Hz
FIDRES    0.227065 Hz
AQ         2.2020595 sec
RG         203
DW         16.800 usec
DE         6.50 usec
TE         296.7 K
D1         1.00000000 sec
D11        0.03000000 sec
TD0        1
  
```

```

===== CHANNEL f1 =====
NUC1      13C
P1         9.68 usec
PL1        -0.60 dB
PL1W      41.24164963 W
SFO1      100.6227690 MHz
  
```

```

===== CHANNEL f2 =====
CPDPRG2   waltz16
NUC2       1H
PCPD2      90.00 usec
PL2         0.00 dB
PL12       15.66 dB
PL2W       8.31434441 W
PL12W      0.22585411 W
SFO2       400.1320007 MHz
SI          131072
SF          100.6127249 MHz
WDW         EM
SSB         0
LB          1.00 Hz
GB          0
PC          1.40
  
```

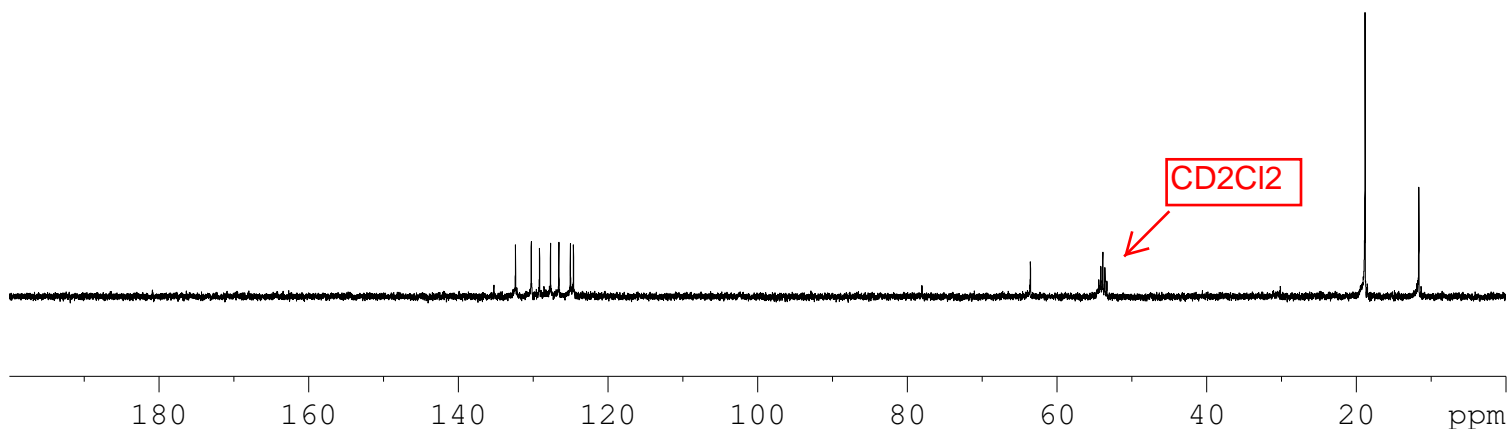

qyj-B-0367-CD2Cl2

NAME qyj-B-0367-CD2Cl2  
EXPNO 1  
PROCNO 1  
Date\_ 20141115  
Time 14.40  
INSTRUM spect  
PROBHD 5 mm PABBO BB-  
PULPROG zgdc  
TD 65536  
SOLVENT CDCl3  
NS 8  
DS 0  
SWH 25510.203 Hz  
FIDRES 0.389255 Hz  
AQ 1.2845556 sec  
RG 228  
DW 19.600 usec  
DE 6.50 usec  
TE 298.7 K  
D1 5.0000000 sec  
D11 0.0300000 sec  
TD0 1

===== CHANNEL f1 =====  
NUC1 11B  
P1 7.60 usec  
PL1 -3.00 dB  
PL1W 55.13059616 W  
SFO1 128.3968556 MHz

===== CHANNEL f2 =====  
CPDPRG2 waltz16  
NUC2 1H  
PCPD2 90.00 usec  
PL2 -1.00 dB  
PL12 15.16 dB  
PL2W 13.56617069 W  
PL12W 0.32844096 W  
SFO2 400.1916008 MHz  
SI 32768  
SF 128.3969291 MHz  
WDW EM  
SSB 0  
LB 3.00 Hz  
GB 0  
PC 1.40

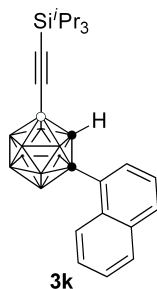

-2.56  
-9.64  
-12.17

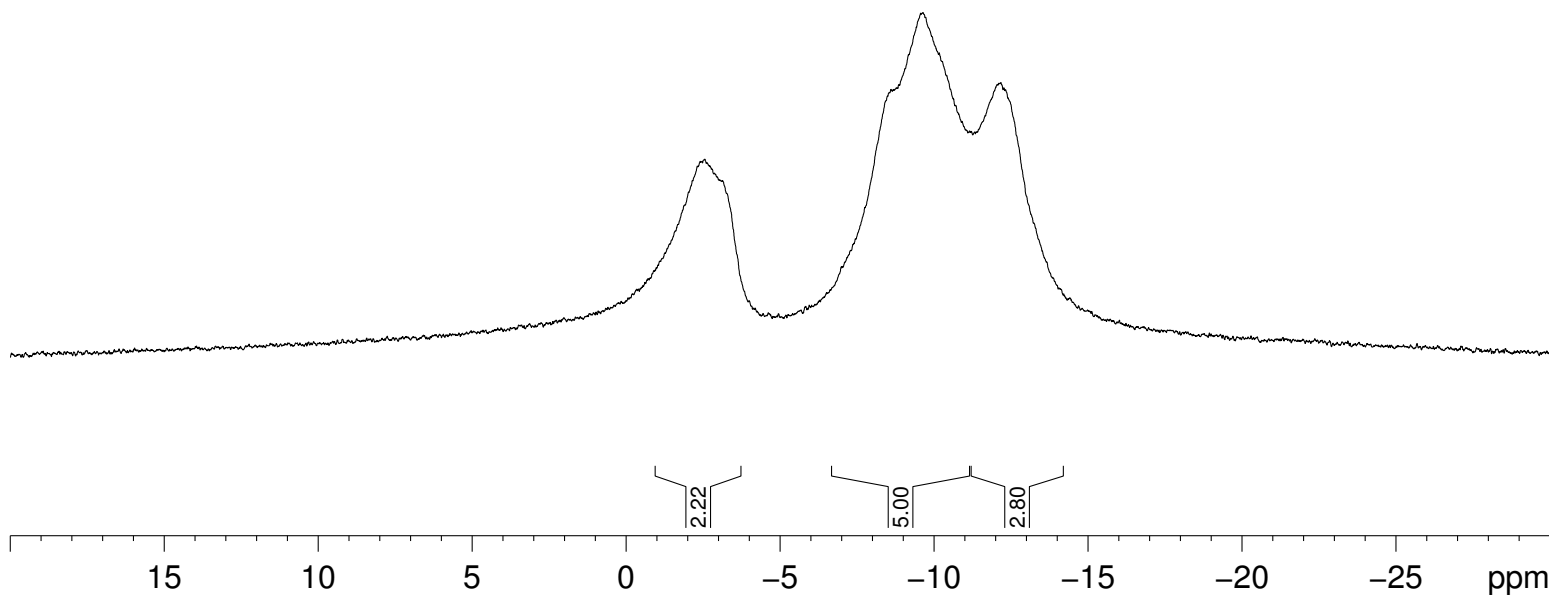

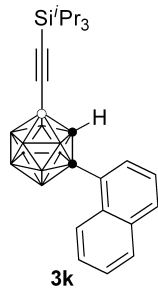

— -1.55  
 — -2.33  
 — -3.37  
  
 — -7.56  
 — -8.81  
 — -9.86  
 — -10.94  
 — -12.25

qyj-B-0367-CD2Cl2 (C)

NAME qyj-B-0367-CD2Cl2 (C)  
 EXPNO 1  
 PROCNO 1  
 Date\_ 20141115  
 Time 14.43  
 INSTRUM spect  
 PROBHD 5 mm PABBO BB-  
 PULPROG zg30  
 TD 65536  
 SOLVENT CDCl3  
 NS 24  
 DS 0  
 SWH 25510.203 Hz  
 FIDRES 0.389255 Hz  
 AQ 1.2845556 sec  
 RG 406  
 DW 19.600 usec  
 DE 6.50 usec  
 TE 298.3 K  
 D1 5.0000000 sec  
 TD0 1

===== CHANNEL f1 =====  
 NUC1 11B  
 P1 7.60 usec  
 PL1 -3.00 dB  
 PL1W 55.13059616 W  
 SFO1 128.3968556 MHz  
 SI 32768  
 SF 128.3968865 MHz  
 WDW EM  
 SSB 0  
 LB 3.00 Hz  
 GB 0  
 PC 1.40

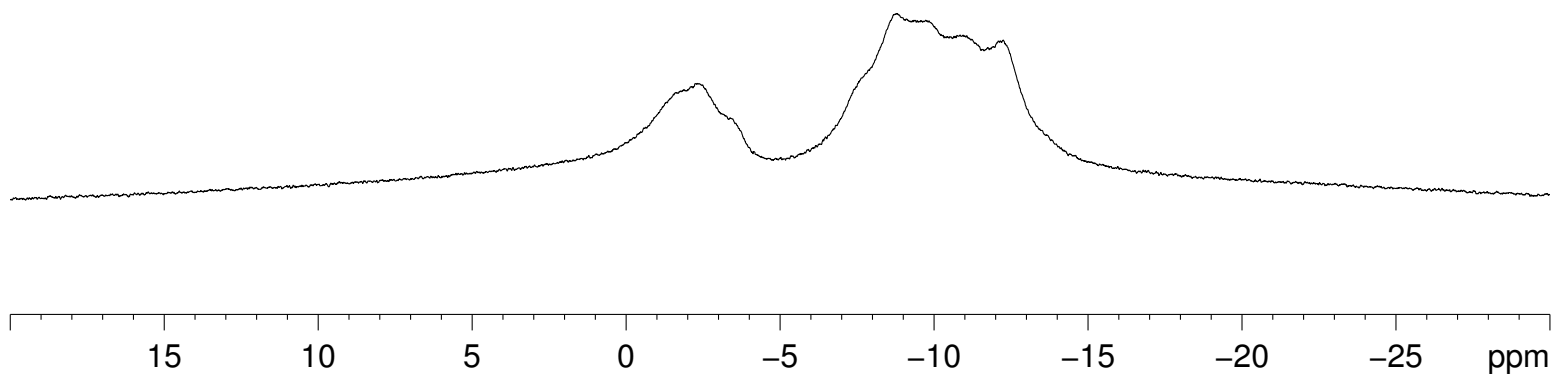



7.323  
7.310  
7.245  
7.236  
6.951  
6.941  
6.929

5.320

4.145

1.075

qyj-H-0368-cd2c12

Bruker Advance III 400

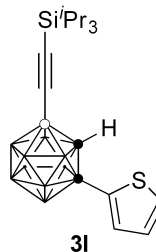

NAME qyj-H-0368-cd2c12  
EXPNO 1  
PROCNO 1  
Date\_ 20141113  
Time 14.16  
INSTRUM spect  
PROBHD 5 mm PADUL 13C  
PULPROG zg30  
TD 65536  
SOLVENT CD2C12  
NS 8  
DS 2  
SWH 8223.685 Hz  
FIDRES 0.125483 Hz  
AQ 3.9846387 sec  
RG 80.6  
DW 60.800 usec  
DE 6.50 usec  
TE 297.4 K  
D1 1.00000000 sec  
TD0 1

==== CHANNEL f1 =====  
NUC1 1H  
P1 14.83 usec  
PL1 0.00 dB  
PL1W 8.31434441 W  
SFO1 400.1324710 MHz  
SI 32768  
SF 400.1300141 MHz  
WDW EM  
SSB 0  
LB 0.30 Hz  
GB 0  
PC 1.00

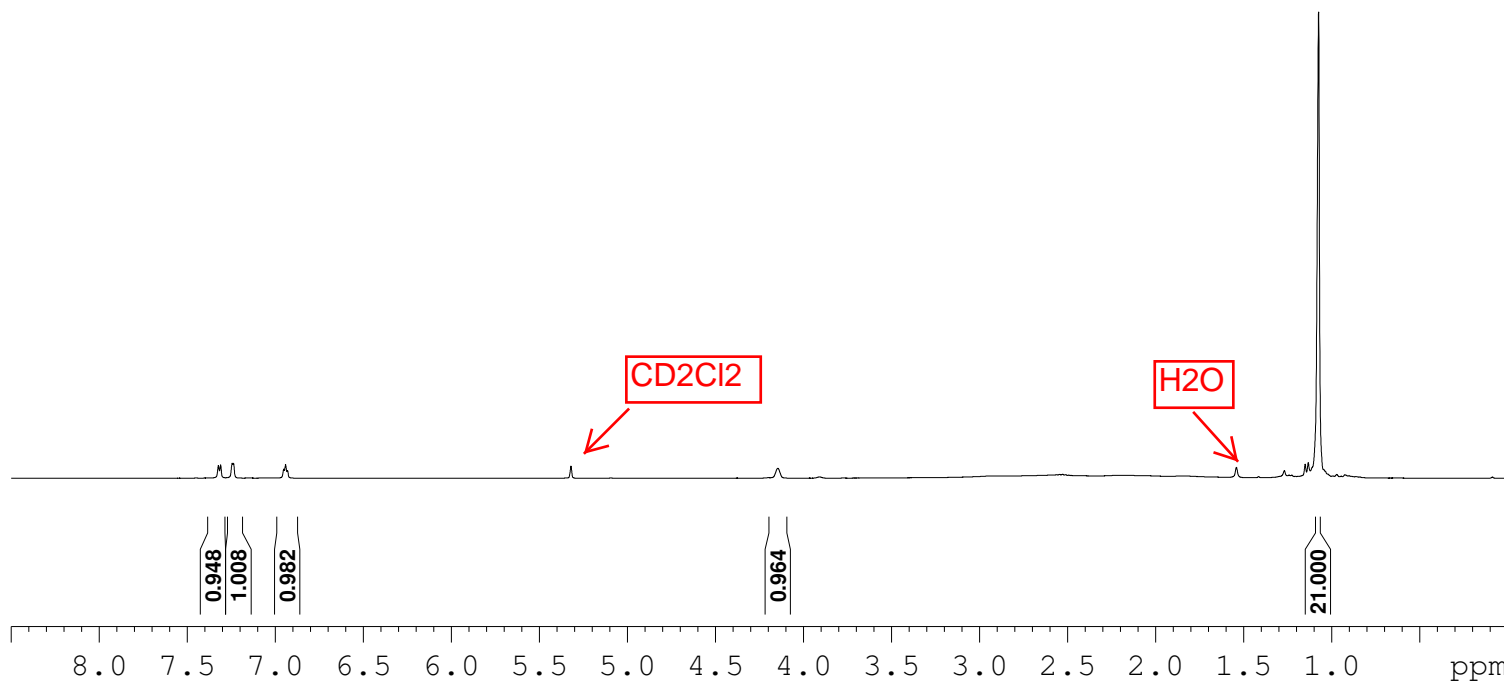

136.754  
130.744  
128.727  
127.755

72.540  
65.312  
54.379  
54.111  
53.840  
53.570  
53.301

18.774  
11.588

qyj-C-0368-cd2c12

Bruker Advance III 400

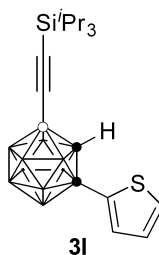

NAME qyj-C-0368-cd2c12  
EXPNO 1  
PROCNO 1  
Date\_ 20141113  
Time 14.20  
INSTRUM spect  
PROBHD 5 mm PADUL 13C  
PULPROG zgdc  
TD 131072  
SOLVENT CD2C12  
NS 125  
DS 0  
SWH 29761.904 Hz  
FIDRES 0.227065 Hz  
AQ 2.2020595 sec  
RG 203  
DW 16.800 usec  
DE 6.50 usec  
TE 297.9 K  
D1 1.00000000 sec  
D11 0.03000000 sec  
TD0 1

===== CHANNEL f1 =====  
NUC1 13C  
P1 9.68 usec  
PL1 -0.60 dB  
PL1W 41.24164963 W  
SFO1 100.6227690 MHz

===== CHANNEL f2 =====  
CPDPRG2 waltz16  
NUC2 1H  
PCPD2 90.00 usec  
PL2 0.00 dB  
PL12 15.66 dB  
PL2W 8.31434441 W  
PL12W 0.22585411 W  
SFO2 400.1320007 MHz  
SI 131072  
SF 100.6127243 MHz  
WDW EM  
SSB 0  
LB 1.00 Hz  
GB 0  
PC 1.40

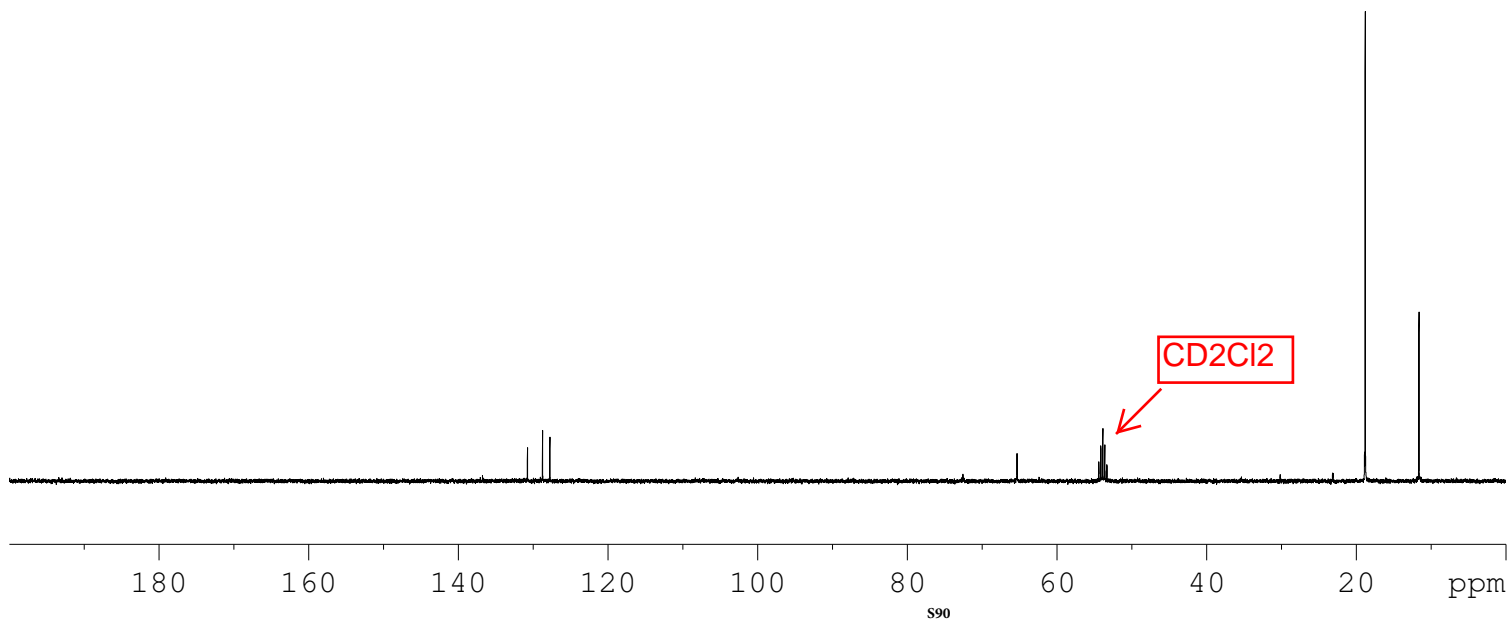

qyj-B-0368-CD2Cl2

NAME qyj-B-0368-CD2Cl2  
EXPNO 1  
PROCNO 1  
Date\_ 20141115  
Time 14.23  
INSTRUM spect  
PROBHD 5 mm PABBO BB-  
PULPROG zgdc  
TD 65536  
SOLVENT CDCl3  
NS 5  
DS 0  
SWH 25510.203 Hz  
FIDRES 0.389255 Hz  
AQ 1.2845556 sec  
RG 228  
DW 19.600 usec  
DE 6.50 usec  
TE 298.8 K  
D1 5.0000000 sec  
D11 0.0300000 sec  
TD0 1

==== CHANNEL f1 =====  
NUC1 11B  
P1 7.60 usec  
PL1 -3.00 dB  
PL1W 55.13059616 W  
SFO1 128.3968556 MHz

==== CHANNEL f2 =====  
CPDPRG2 waltz16  
NUC2 1H  
PCPD2 90.00 usec  
PL2 -1.00 dB  
PL12 15.16 dB  
PL2W 13.56617069 W  
PL12W 0.32844096 W  
SFO2 400.1916008 MHz  
SI 32768  
SF 128.3969291 MHz  
WDW EM  
SSB 0  
LB 3.00 Hz  
GB 0  
PC 1.40

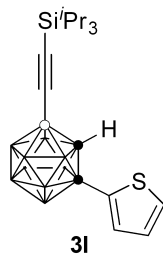

— -2.39  
— -4.42  
— -9.17  
— -10.37  
— -10.76  
— -11.88

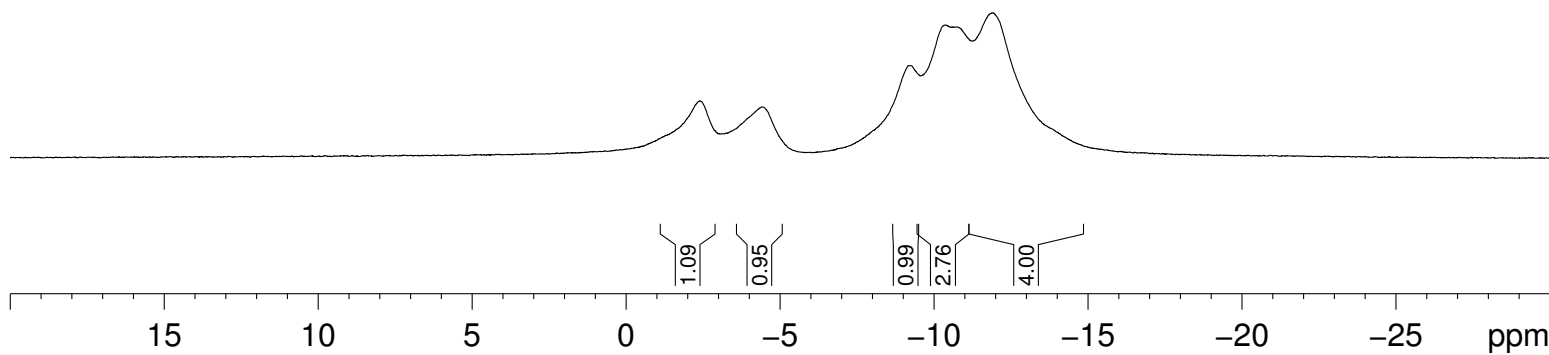

| -1.52  
 | -2.67  
 | -3.49  
 | -4.61  
  
 | -8.36  
 | -9.47  
 | -11.12

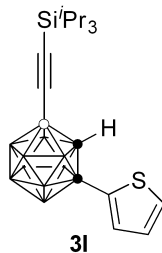

qyj-B-0368-CD2Cl2 (C

```

NAME      qyj-B-0368-CD2Cl2 (C)
EXPNO     1
PROCNO    1
Date_     20141115
Time      14.24
INSTRUM   spect
PROBHD    5 mm PABBO BB-
PULPROG   zg30
TD        65536
SOLVENT   CDC13
NS        16
DS        0
SWH       25510.203 Hz
FIDRES    0.389255 Hz
AQ        1.2845556 sec
RG        406
DW        19.600 usec
DE        6.50 usec
TE        298.6 K
D1        5.00000000 sec
TD0       1
  
```

```

===== CHANNEL f1 =====
NUC1      11B
P1        7.60 usec
PL1       -3.00 dB
PL1W      55.13059616 W
SFO1      128.3968556 MHz
SI        32768
SF        128.3968865 MHz
WDW       EM
SSB       0
LB        3.00 Hz
GB        0
PC        1.40
  
```

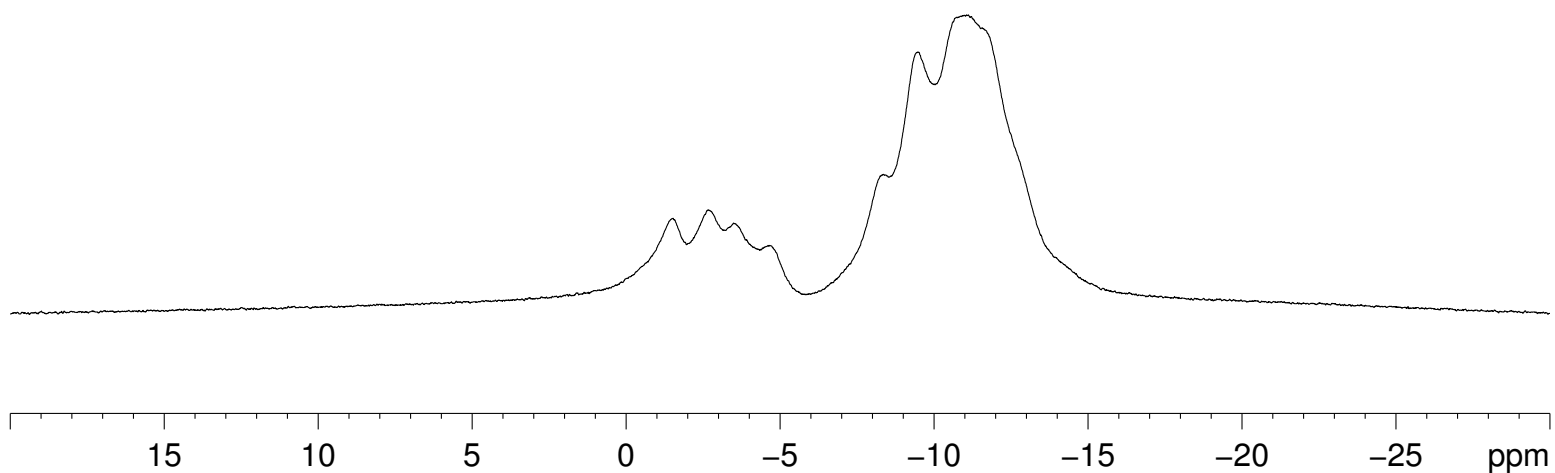

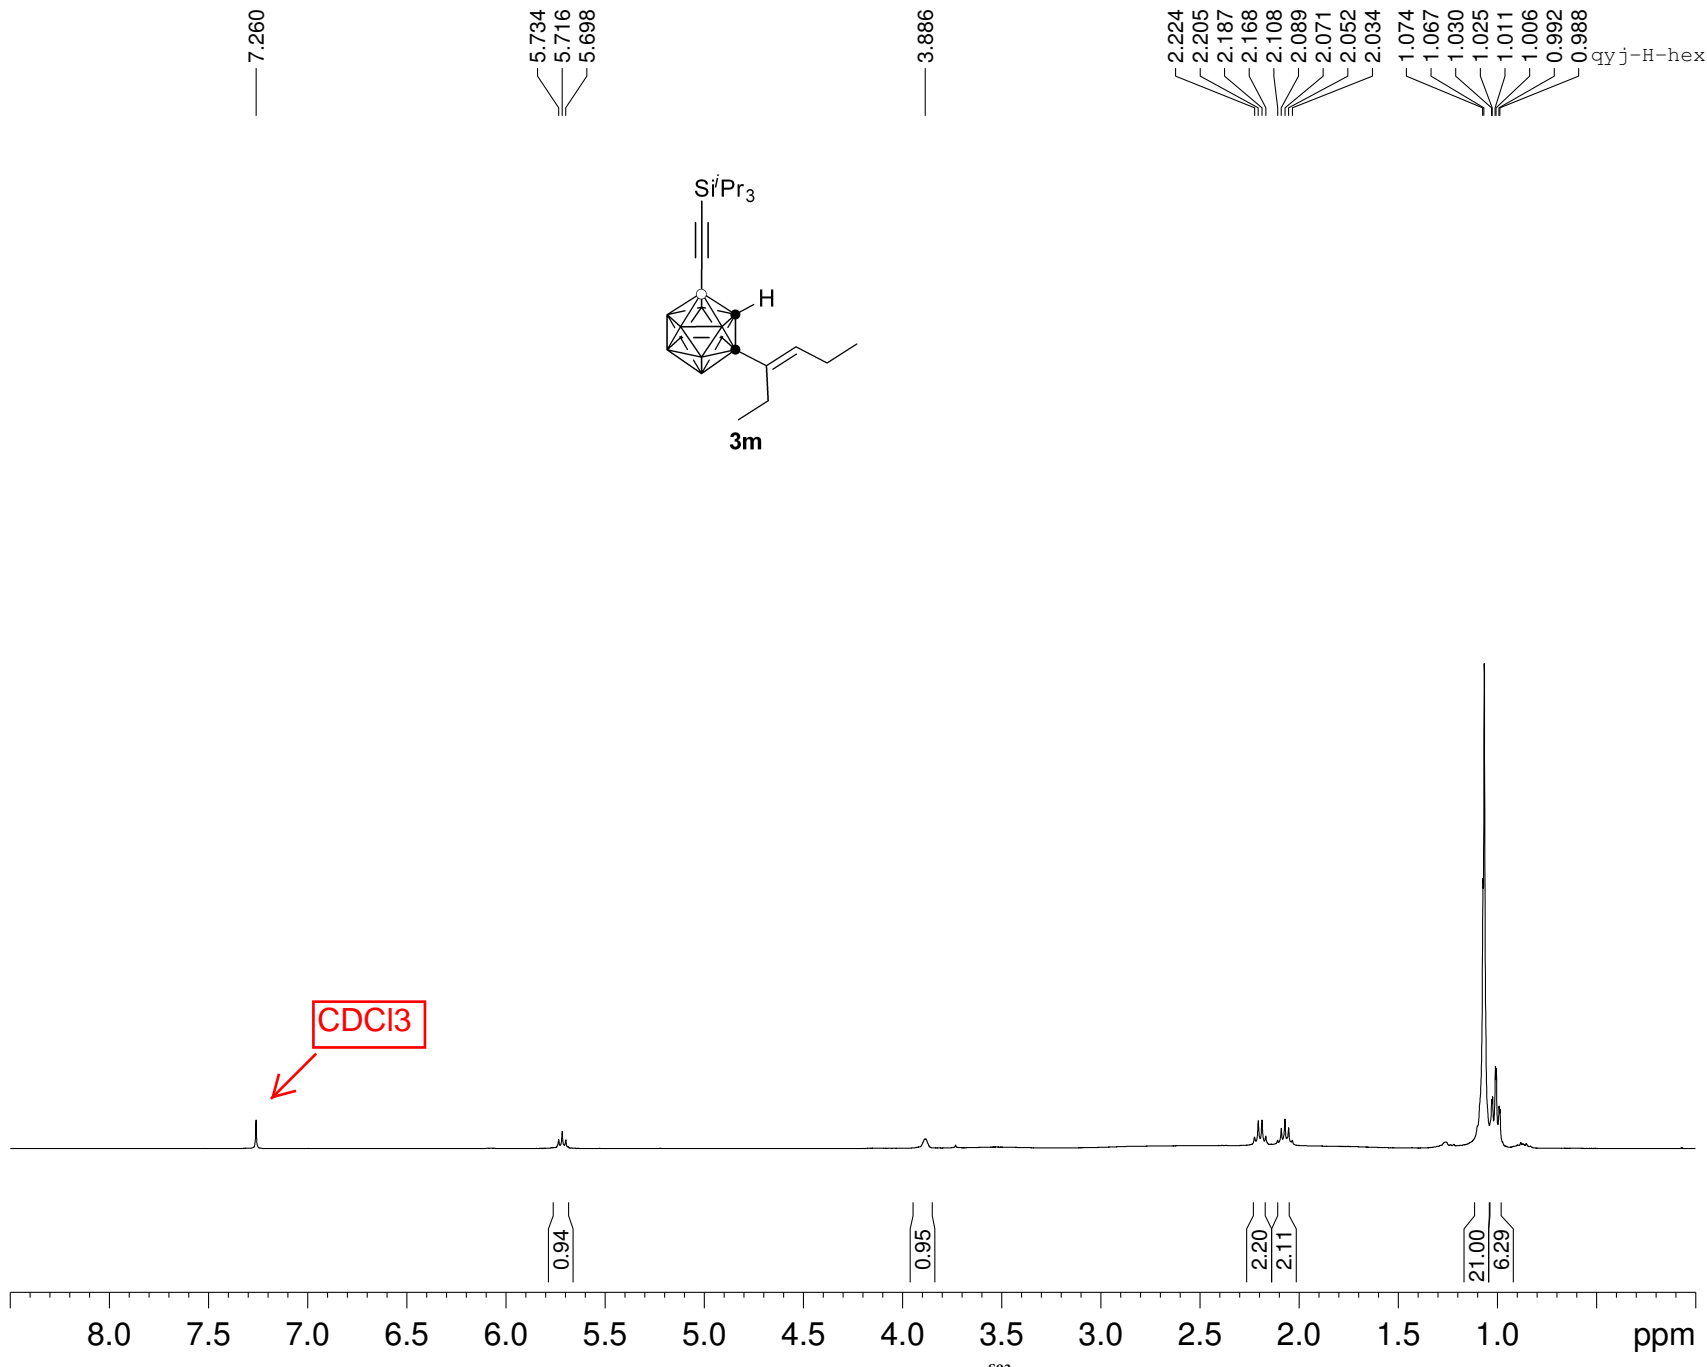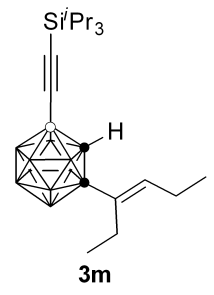

7.260  
 5.734  
 5.716  
 5.698  
 3.886  
 2.224  
 2.205  
 2.187  
 2.168  
 2.108  
 2.089  
 2.071  
 2.052  
 2.034  
 1.074  
 1.067  
 1.030  
 1.025  
 1.011  
 1.006  
 0.992  
 0.988  
 qyj-H-hex-CDCl3

NAME qyj-H-hex-CDCl3  
 EXPNO 1  
 PROCNO 1  
 Date\_ 20150516  
 Time 16.16  
 INSTRUM spect  
 PROBHD 5 mm PABBO BB-  
 PULPROG zg30  
 TD 65536  
 SOLVENT CDCl3  
 NS 8  
 DS 2  
 SWH 8223.685 Hz  
 FIDRES 0.125483 Hz  
 AQ 3.9846387 sec  
 RG 90.5  
 DW 60.800 usec  
 DE 6.50 usec  
 TE 298.3 K  
 D1 1.00000000 sec  
 TD0 1

===== CHANNEL f1 =====  
 NUC1 1H  
 P1 14.00 usec  
 PL1 -1.00 dB  
 PL1W 13.56617069 W  
 SFO1 400.1924713 MHz  
 SI 32768  
 SF 400.1900152 MHz  
 WDW EM  
 SSB 0  
 LB 0.30 Hz  
 GB 0  
 PC 1.00

136.24  
134.03

78.82  
77.48  
77.16  
76.84

61.68

24.21  
22.01  
18.74  
13.93  
13.68  
11.32

qyj-C-hex-CDC13

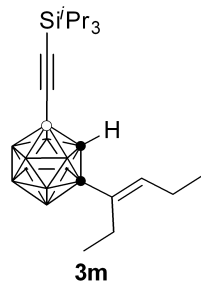

NAME qyj-C-hex-CDC13  
EXPNO 1  
PROCNO 1  
Date\_ 20150516  
Time 16.19  
INSTRUM spect  
PROBHD 5 mm PABBO BB-  
PULPROG zgpg30  
TD 65536  
SOLVENT CDC13  
NS 120  
DS 4  
SWH 24038.461 Hz  
FIDRES 0.366798 Hz  
AQ 1.3631988 sec  
RG 203  
DW 20.800 usec  
DE 6.50 usec  
TE 298.5 K  
D1 2.00000000 sec  
D11 0.03000000 sec  
TD0 1

===== CHANNEL f1 =====  
NUC1 13C  
P1 9.90 usec  
PL1 -2.00 dB  
PL1W 55.33689499 W  
SFO1 100.6379183 MHz

===== CHANNEL f2 =====  
CPDPRG2 waltz16  
NUC2 1H  
PCPD2 90.00 usec  
PL2 -1.00 dB  
PL12 15.16 dB  
PL13 18.62 dB  
PL2W 13.56617069 W  
PL12W 0.32844096 W  
PL13W 0.14806664 W  
SFO2 400.1916008 MHz  
SI 32768  
SF 100.6278427 MHz  
WDW EM  
SSB 0  
LB 1.00 Hz  
GB 0  
PC 1.40

CDC13

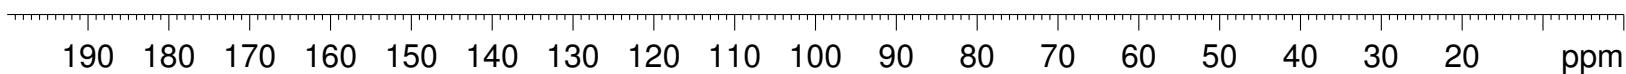

— -3.42  
 — -4.22  
 — -9.01  
 — -10.06  
 — -12.36

qyj-B-hex-CDCl3

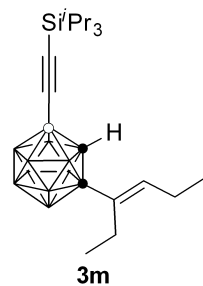

```

NAME      qyj-B-hex-CDCl3
EXPNO     1
PROCNO    1
Date_     20150516
Time      19.31
INSTRUM   spect
PROBHD    5 mm PABBO BB-
PULPROG   zgdc
TD        65536
SOLVENT   C6D6
NS        20
DS        0
SWH       25510.203 Hz
FIDRES    0.389255 Hz
AQ        1.2845556 sec
RG        362
DW        19.600 usec
DE        6.50 usec
TE        299.2 K
D1        5.00000000 sec
D11       0.03000000 sec
TD0       1
  
```

```

===== CHANNEL f1 =====
NUC1      11B
P1        7.60 usec
PL1       -3.00 dB
PL1W      55.13059616 W
SFO1      128.3968556 MHz
  
```

```

===== CHANNEL f2 =====
CPDPRG2   waltz16
NUC2      1H
PCPD2     90.00 usec
PL2       -1.00 dB
PL12      15.16 dB
PL2W      13.56617069 W
PL12W     0.32844096 W
SFO2      400.1916008 MHz
SI        32768
SF        128.3968847 MHz
WDW       EM
SSB       0
LB        3.00 Hz
GB        0
PC        1.40
  
```

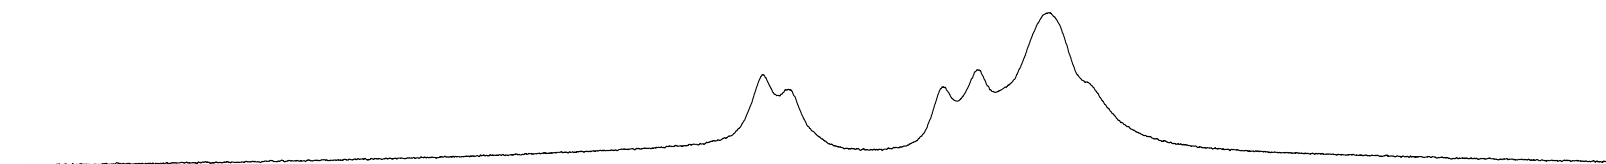

1.11  
 1.05  
 0.97  
 0.99  
 6.00

| -2.87  
 | -3.90  
 | -4.68  
  
 | -8.40  
 | -9.63  
 | -10.61  
 | -11.51  
 | -12.81  
 | -14.11

qyj-B-hex-CDC13 (C)

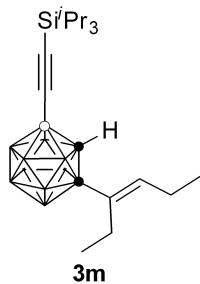

```

NAME      qyj-B-hex-CDC13 (C)
EXPNO     1
PROCNO    1
Date_     20150516
Time      19.34
INSTRUM   spect
PROBHD    5 mm PABBO BB-
PULPROG   zg30
TD         65536
SOLVENT   C6D6
NS         24
DS         0
SWH        25510.203 Hz
FIDRES     0.389255 Hz
AQ         1.2845556 sec
RG         512
DW         19.600 usec
DE         6.50 usec
TE         298.8 K
D1         5.0000000 sec
TD0        1
  
```

```

===== CHANNEL f1 =====
NUC1      11B
P1         7.60 usec
PL1        -3.00 dB
PL1W      55.13059616 W
SFO1      128.3968556 MHz
SI         32768
SF         128.3968865 MHz
WDW        EM
SSB        0
LB         3.00 Hz
GB         0
PC         1.40
  
```

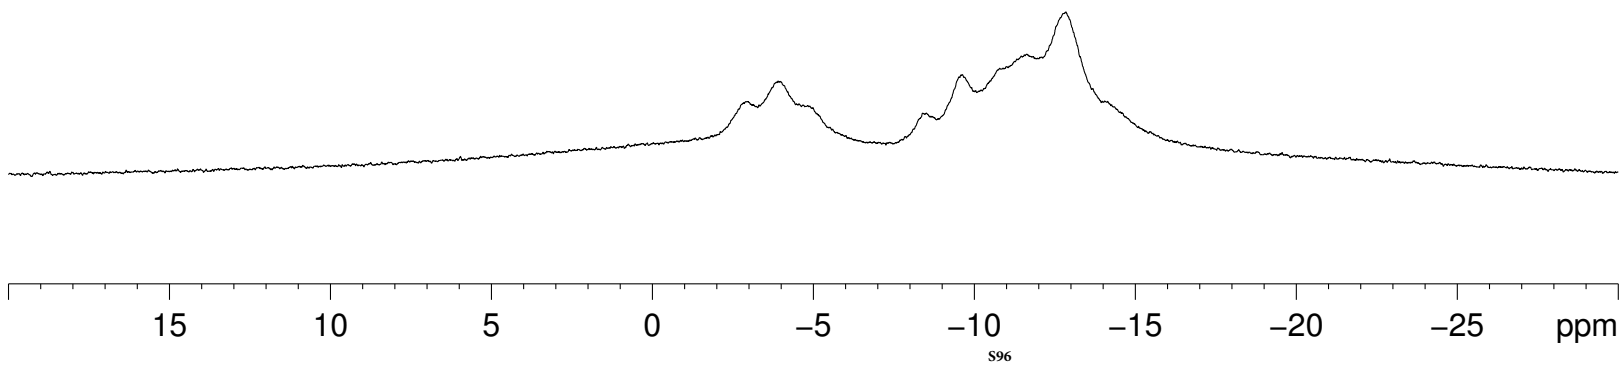



5.320

3.848  
3.699

1.073

qyj-H-0363-CD2Cl2

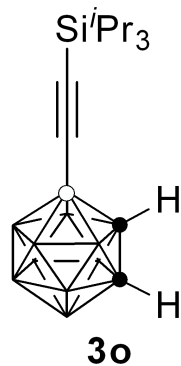

NAME qyj-H-0363-CD2Cl2  
EXPNO 1  
PROCNO 1  
Date\_ 20141105  
Time 16.01  
INSTRUM spect  
PROBHD 5 mm PABBO BB-  
PULPROG zg30  
TD 65536  
SOLVENT CD2Cl2  
NS 8  
DS 2  
SWH 8223.685 Hz  
FIDRES 0.125483 Hz  
AQ 3.9846387 sec  
RG 36  
DW 60.800 usec  
DE 6.50 usec  
TE 299.0 K  
D1 1.00000000 sec  
TD0 1

==== CHANNEL f1 =====  
NUC1 1H  
P1 14.00 usec  
PL1 -1.00 dB  
PL1W 13.56617069 W  
SFO1 400.1924713 MHz  
SI 32768  
SF 400.1900213 MHz  
WDW EM  
SSB 0  
LB 0.30 Hz  
GB 0  
PC 1.00

CD2Cl2

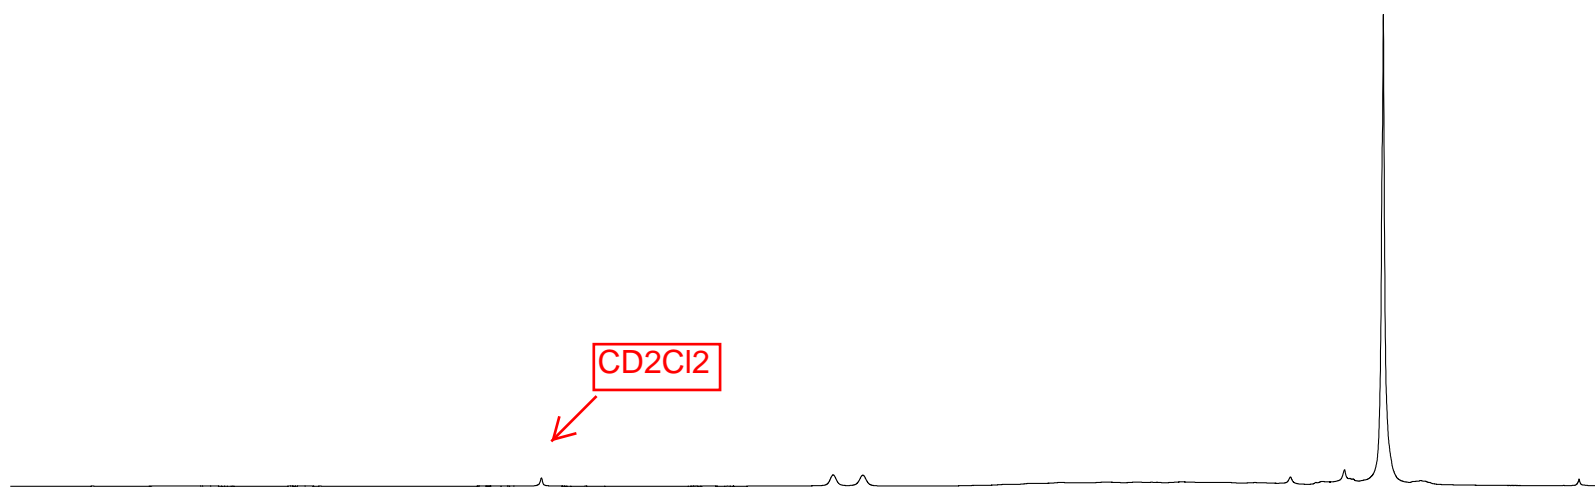

1.00  
1.06

21.39

7.5 7.0 6.5 6.0 5.5 5.0 4.5 4.0 3.5 3.0 2.5 2.0 1.5 1.0 ppm

56.74  
55.04  
54.38  
54.11  
53.84  
53.57  
53.30

18.77  
11.59

qyj-C-0363-CD2C12

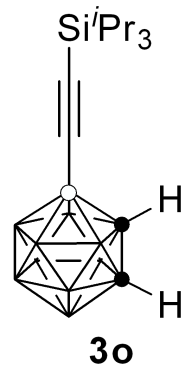

```

NAME      qyj-C-0363-CD2C12
EXPNO     1
PROCNO    1
Date_     20141105
Time      16.03
INSTRUM   spect
PROBHD    5 mm PABBO BB-
PULPROG   zgpg30
TD        65536
SOLVENT   CD2C12
NS        100
DS        4
SWH       24038.461 Hz
FIDRES    0.366798 Hz
AQ        1.3631988 sec
RG        181
DW        20.800 usec
DE        6.50 usec
TE        299.4 K
D1        2.00000000 sec
D11       0.03000000 sec
TD0       1
  
```

```

===== CHANNEL f1 =====
NUC1      13C
P1        9.90 usec
PL1       -2.00 dB
PL1W      55.33689499 W
SFO1      100.6379183 MHz
  
```

```

===== CHANNEL f2 =====
CPDPRG2   waltz16
NUC2      1H
PCPD2     90.00 usec
PL2       -1.00 dB
PL12      15.16 dB
PL13      18.62 dB
PL2W      13.56617069 W
PL12W     0.32844096 W
PL13W     0.14806664 W
SFO2      400.1916008 MHz
SI        32768
SF        100.6278125 MHz
WDW       EM
SSB       0
LB        1.00 Hz
GB        0
PC        1.40
  
```

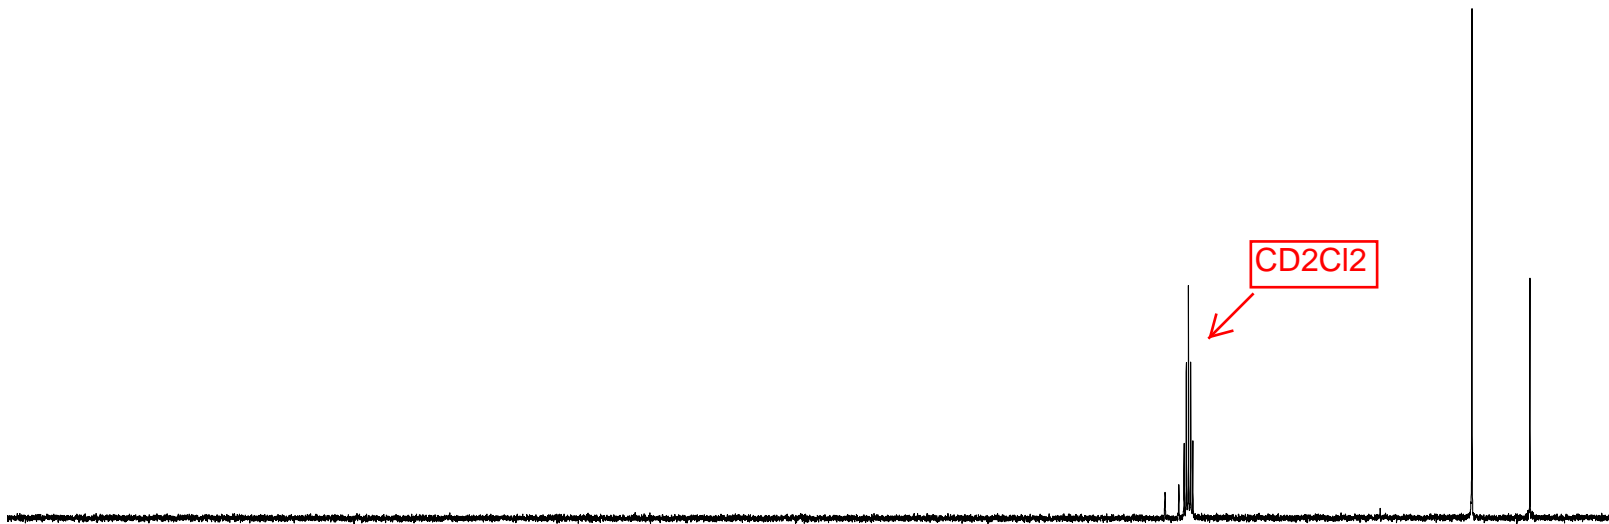

190 180 170 160 150 140 130 120 110 100 90 80 70 60 50 40 30 20 ppm

qyj-B-0363-CD2C12

NAME qyj-B-0363-CD2C12  
EXPNO 1  
PROCNO 1  
Date\_ 20141105  
Time 15.52  
INSTRUM spect  
PROBHD 5 mm PABBO BB-  
PULPROG zgdc  
TD 65536  
SOLVENT C6D6  
NS 12  
DS 0  
SWH 25510.203 Hz  
FIDRES 0.389255 Hz  
AQ 1.2845556 sec  
RG 181  
DW 19.600 usec  
DE 6.50 usec  
TE 299.0 K  
D1 5.00000000 sec  
D11 0.03000000 sec  
TD0 1

===== CHANNEL f1 =====  
NUC1 11B  
P1 7.60 usec  
PL1 -3.00 dB  
PL1W 55.13059616 W  
SFO1 128.3968556 MHz

===== CHANNEL f2 =====  
CPDPRG2 waltz16  
NUC2 1H  
PCPD2 90.00 usec  
PL2 -1.00 dB  
PL12 15.16 dB  
PL2W 13.56617069 W  
PL12W 0.32844096 W  
SFO2 400.1916008 MHz  
SI 32768  
SF 128.3969291 MHz  
WDW EM  
SSB 0  
LB 3.00 Hz  
GB 0  
PC 1.40

— -2.31  
— -3.45  
  
— -9.11  
— -10.29  
  
— -12.65  
— -13.32  
— -14.33  
— -15.28  
— -16.43

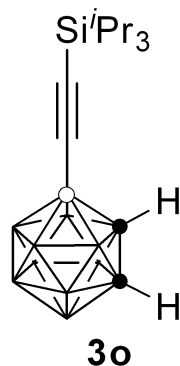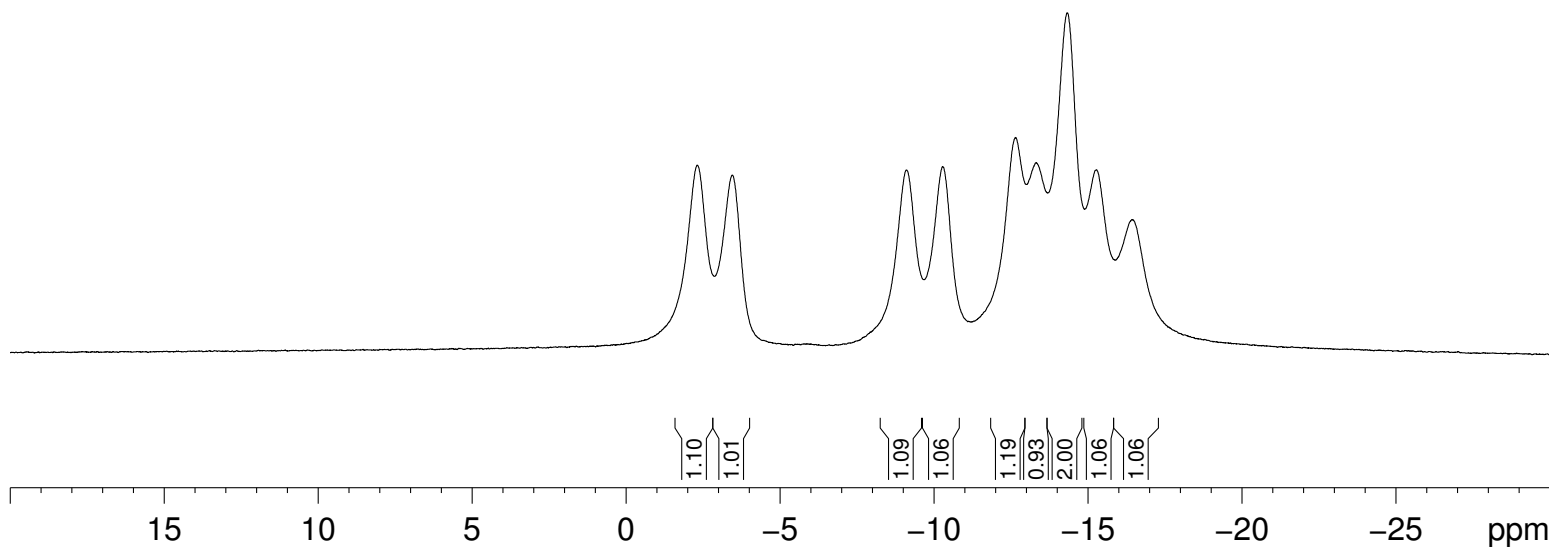

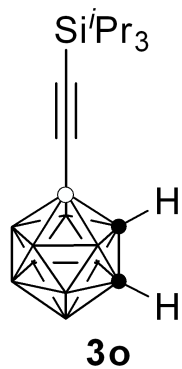

|   |       |   |        |   |        |
|---|-------|---|--------|---|--------|
| — | -1.40 | — | -8.20  | — | -13.05 |
| — | -2.56 | — | -9.37  | — | -14.63 |
| — | -3.70 | — | -10.55 | — | -15.58 |
|   |       | — | -11.67 | — | -16.73 |

qyj-B-0363-CD2Cl2 (C

```

NAME      qyj-B-0363-CD2Cl2 (C)
EXPNO     1
PROCNO    1
Date_     20141105
Time      15.55
INSTRUM   spect
PROBHD    5 mm PABBO BB-
PULPROG   zg30
TD        65536
SOLVENT   C6D6
NS        16
DS        0
SWH       25510.203 Hz
FIDRES    0.389255 Hz
AQ        1.2845556 sec
RG        362
DW        19.600 usec
DE        6.50 usec
TE        298.9 K
D1        5.00000000 sec
TD0       1
  
```

```

===== CHANNEL f1 =====
NUC1      11B
P1        7.60 usec
PL1       -3.00 dB
PL1W      55.13059616 W
SFO1     128.3968556 MHz
SI        32768
SF        128.3968865 MHz
WDW       EM
SSB       0
LB        3.00 Hz
GB        0
PC        1.40
  
```

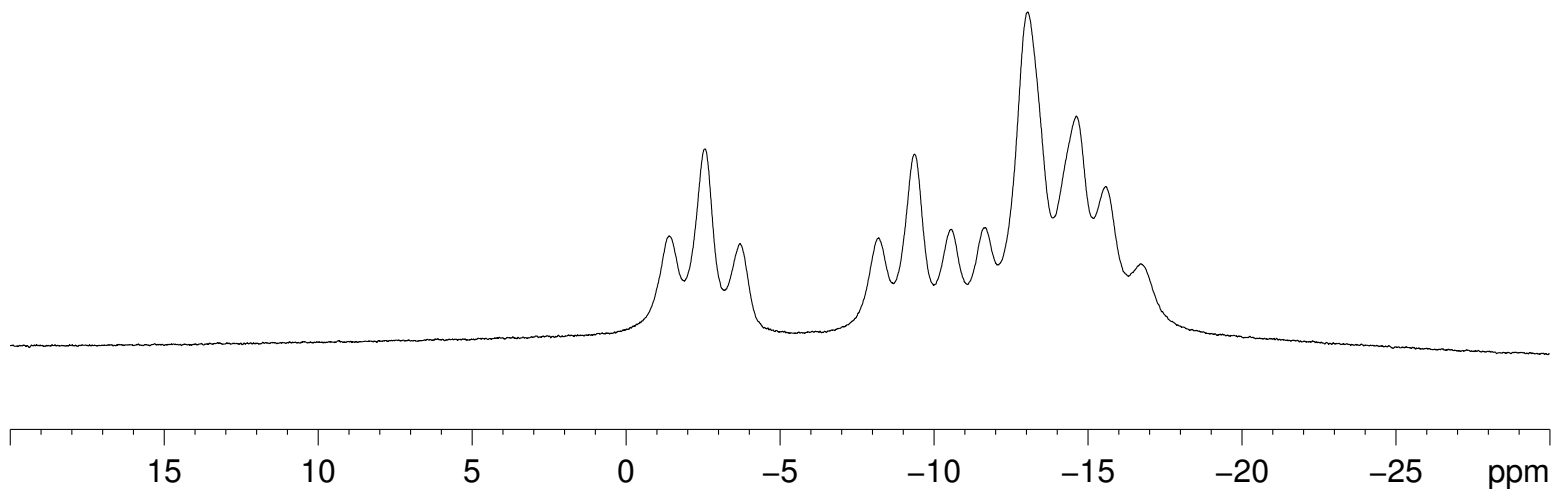

7.260

3.772

2.045

0.933

0.095

qyj-H-0386-CDCl3

Bruker Advance III 400

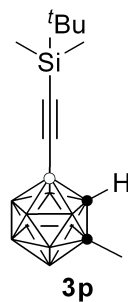

```

NAME      qyj-H-0386-CDCl3
EXPNO     1
PROCNO    1
Date_     20141229
Time      16.02
INSTRUM   spect
PROBHD    5 mm PADUL 13C
PULPROG   zg
TD         65536
SOLVENT   CDCl3
NS         9
DS         0
SWH        10000.000 Hz
FIDRES     0.152588 Hz
AQ         3.2768500 sec
RG         71.8
DW         50.000 usec
DE         6.50 usec
TE         295.3 K
D1         1.00000000 sec
TD0        1

```

```

===== CHANNEL f1 =====
NUC1      1H
P1        14.83 usec
PL1       0.00 dB
PL1W      8.31434441 W
SFO1      400.1318000 MHz
SI         65536
SF        400.1300080 MHz
WDW       EM
SSB       0
LB        0.30 Hz
GB         0
PC         1.00

```

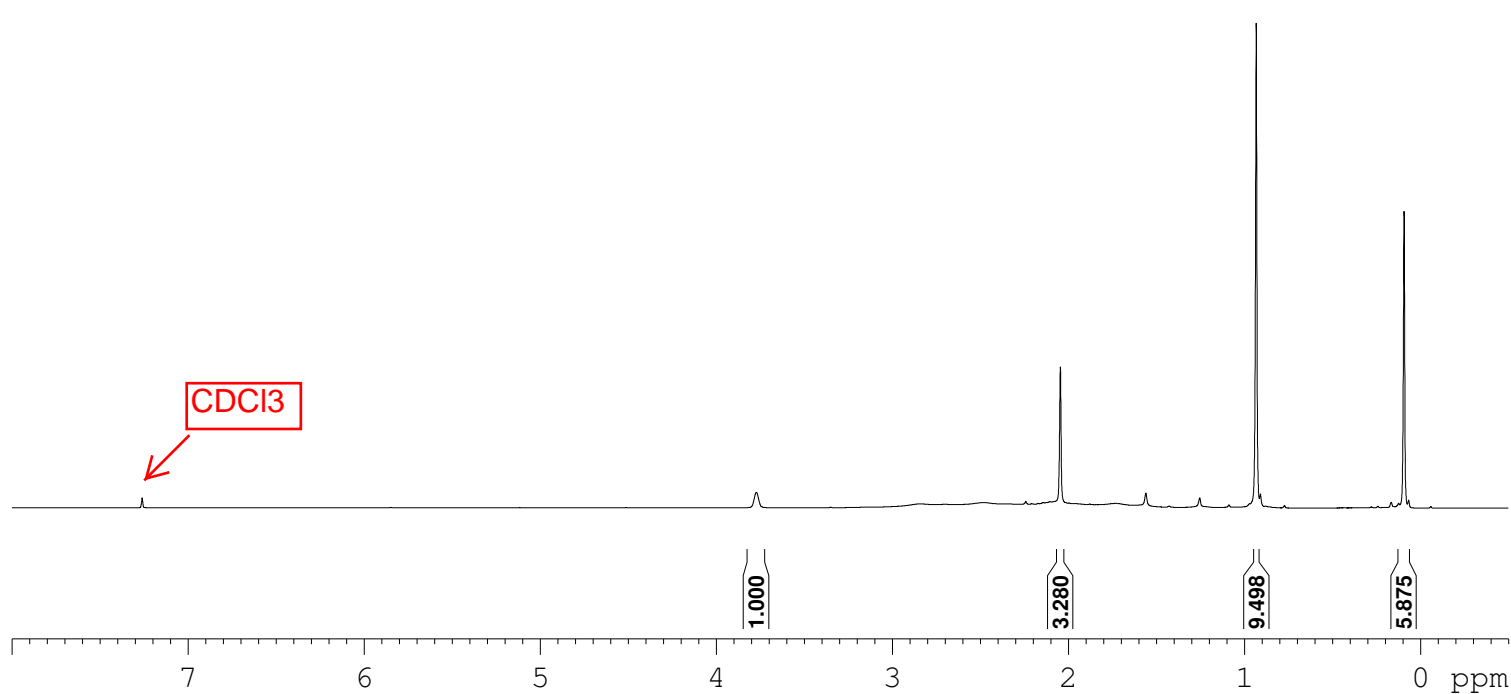

qyj-C-0386-CDC13

Bruker Advance III 400

```
NAME      qyj-C-0386-CDC13
EXPNO     1
PROCNO    1
Date_     20141229
Time      16.05
INSTRUM   spect
PROBHD    5 mm PADUL 13C
PULPROG   zgdc
TD        131072
SOLVENT   CDC13
NS        200
DS        0
SWH       29761.904 Hz
FIDRES    0.227065 Hz
AQ        2.2020595 sec
RG        203
DW        16.800 usec
DE        6.50 usec
TE        295.6 K
D1        1.00000000 sec
D11       0.03000000 sec
TD0       1
```

```
===== CHANNEL f1 =====
NUC1      13C
P1        9.68 usec
PL1       -0.60 dB
PL1W      41.24164963 W
SF01      100.6227690 MHz
```

```
===== CHANNEL f2 =====
CPDPRG2   waltz16
NUC2      1H
PCPD2     90.00 usec
PL2       0.00 dB
PL12      15.66 dB
PL2W      8.31434441 W
PL12W     0.22585411 W
SF02      400.1320007 MHz
SI        131072
SF        100.6127547 MHz
WDW       EM
SSB       0
LB        1.00 Hz
GB        0
PC        1.40
```

77.478  
77.160  
76.843  
70.277  
63.033

26.197  
26.025  
16.806

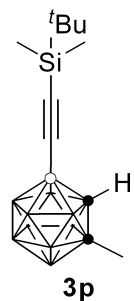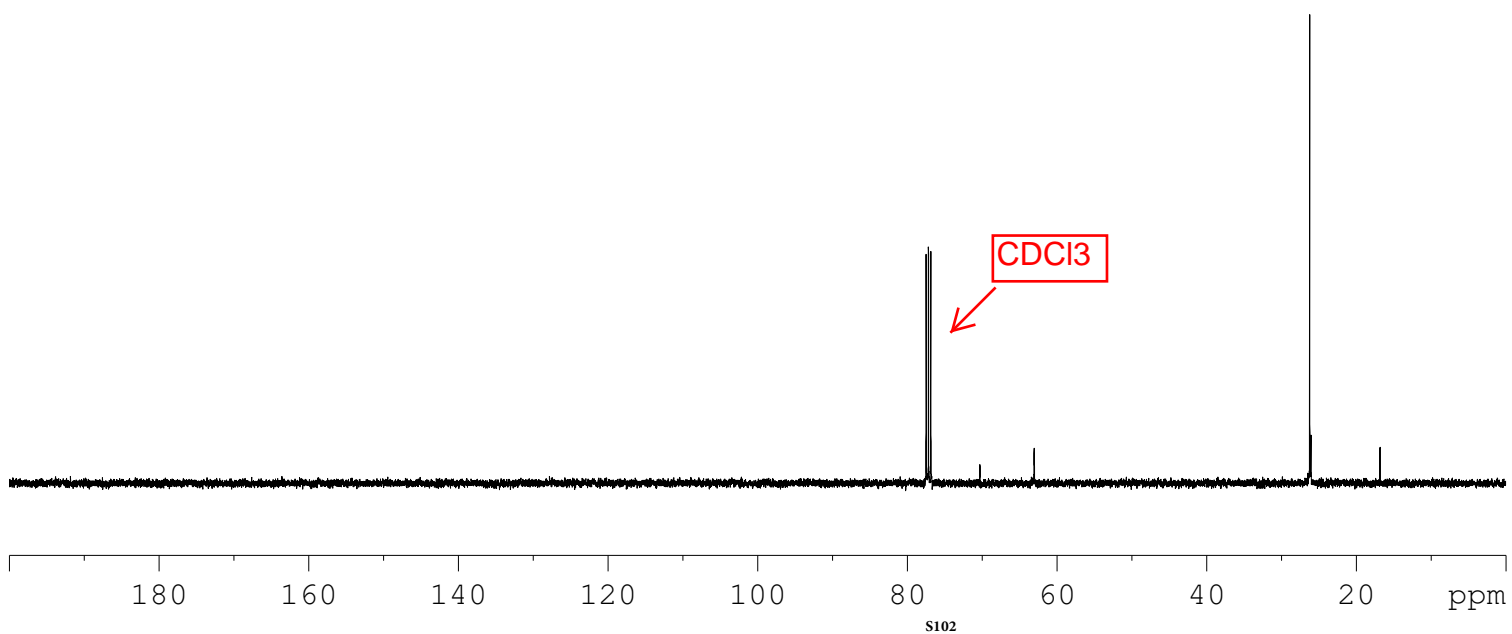

qyj-B-0386-CDC13

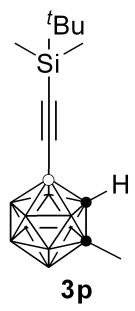

— -2.35  
— -6.15  
— -8.69  
— -9.83  
— -11.69

NAME qyj-B-0386-CDC13  
EXPNO 1  
PROCNO 1  
Date\_ 20141229  
Time 16.24  
INSTRUM spect  
PROBHD 5 mm PABBO BB-  
PULPROG zgdc  
TD 65536  
SOLVENT C6D6  
NS 8  
DS 0  
SWH 25510.203 Hz  
FIDRES 0.389255 Hz  
AQ 1.2845556 sec  
RG 287  
DW 19.600 usec  
DE 6.50 usec  
TE 298.9 K  
D1 5.00000000 sec  
D11 0.03000000 sec  
TD0 1

==== CHANNEL f1 =====  
NUC1 11B  
P1 7.60 usec  
PL1 -3.00 dB  
PL1W 55.13059616 W  
SFO1 128.3968556 MHz

==== CHANNEL f2 =====  
CPDPRG2 waltz16  
NUC2 1H  
PCPD2 90.00 usec  
PL2 -1.00 dB  
PL12 15.16 dB  
PL2W 13.56617069 W  
PL12W 0.32844096 W  
SFO2 400.1916008 MHz  
SI 32768  
SF 128.3968847 MHz  
WDW EM  
SSB 0  
LB 3.00 Hz  
GB 0  
PC 1.40

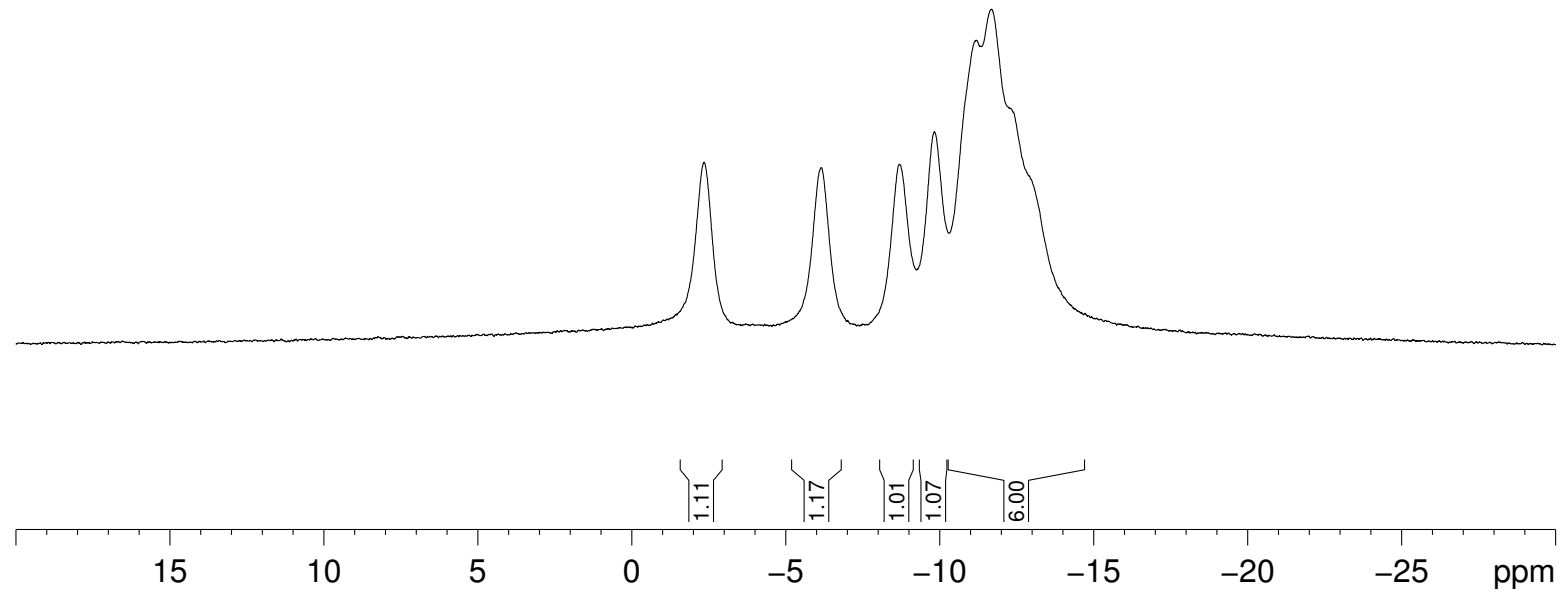

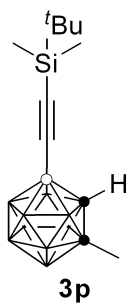

— -2.23  
 — -3.37  
 — -6.02  
 — -7.20  
 — -8.55  
 — -9.73  
 — -10.95  
 — -11.49  
 — -12.81  
 — -14.13

qyj-B-0386-CDC13 (C)

```

NAME      qyj-B-0386-CDC13 (C)
EXPNO     1
PROCNO    1
Date_     20141229
Time      16.26
INSTRUM   spect
PROBHD    5 mm PABBO BB-
PULPROG   zg30
TD        65536
SOLVENT   C6D6
NS        16
DS        0
SWH       38461.539 Hz
FIDRES    0.586877 Hz
AQ        0.8520180 sec
RG        406
DW        13.000 usec
DE        6.50 usec
TE        298.9 K
D1        5.00000000 sec
TD0       1
  
```

```

===== CHANNEL f1 =====
NUC1      11B
P1        7.60 usec
PL1       -3.00 dB
PL1W      55.13059616 W
SFO1     128.3968556 MHz
SI        32768
SF        128.3969425 MHz
WDW       EM
SSB       0
LB        3.00 Hz
GB        0
PC        1.40
  
```

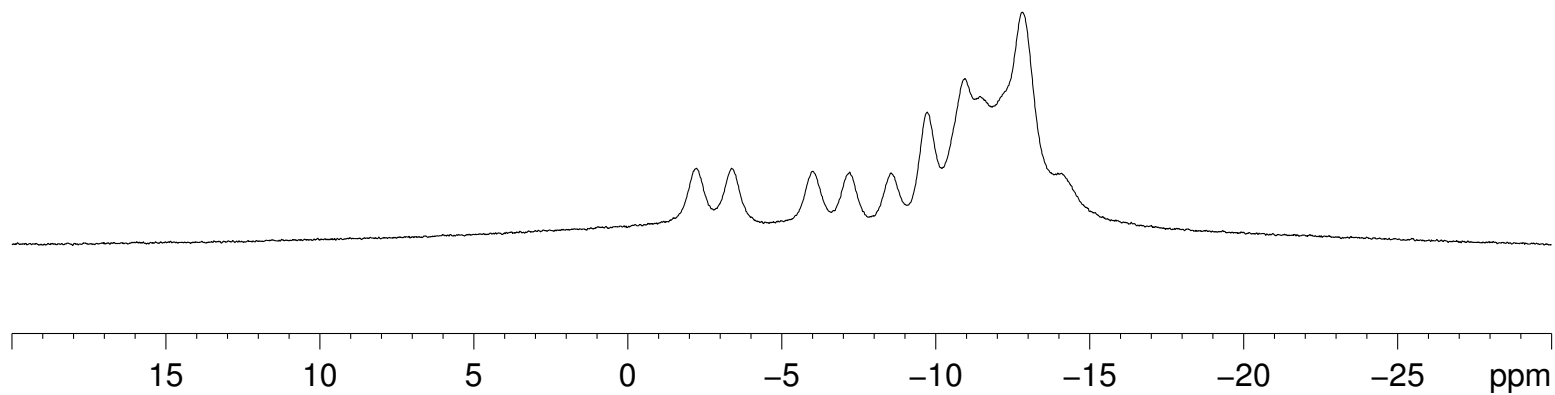



7.473  
7.468  
7.456  
7.449  
7.318  
7.310  
7.307  
7.300  
7.294  
7.292  
7.260

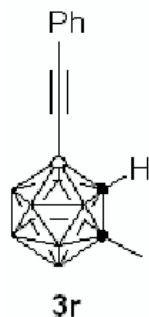

3.856

2.072

1.563

1.331

qyj-H-6-2-CDC13

Current Data Parameters  
NAME qyj-H-6-2-CDC13  
EXPNO 1  
PROCNO 1

F2 - Acquisition Parameters  
Date\_ 20150614  
Time 11.50 h  
INSTRUM spect  
PROBHD Z824601\_0021 (  
PULPROG zg30  
TD 65536  
SOLVENT CDC13  
NS 16  
DS 2  
SWH 8012.820 Hz  
FIDRES 0.122266 Hz  
AQ 4.0894465 sec  
RG 203  
DW 62.400 usec  
DE 6.50 usec  
TE 294.9 K  
D1 1.00000000 sec  
TD0 1  
SFO1 400.1324708 MHz  
NUC1 1H  
P1 15.00 usec  
PLW1 8.31000042 W

F2 - Processing parameters  
SI 65536  
SF 400.1300099 MHz  
WDW EM  
SSB 0  
LB 0.30 Hz  
GB 0  
PC 1.00

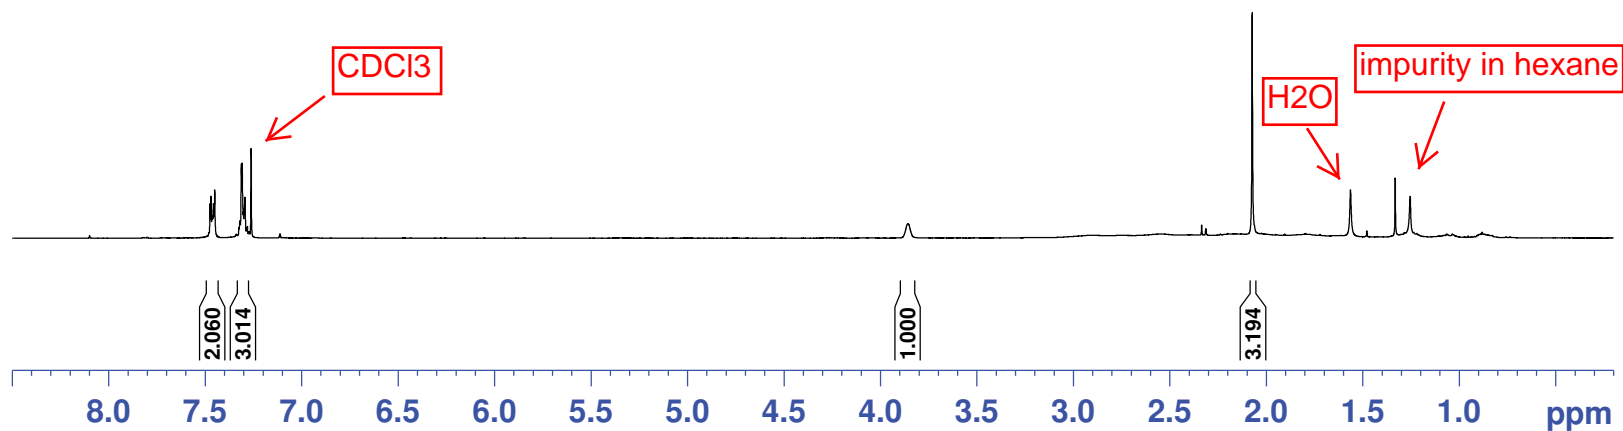

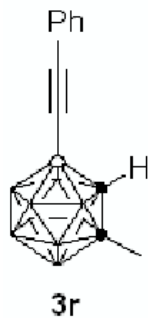

132.177  
128.713  
128.354  
123.024

77.475  
77.157  
76.840  
70.327  
62.903

31.607  
29.846  
26.060

qyj-C-6-2-CDC13

Current Data Parameters  
NAME qyj-C-6-2-CDC13  
EXPNO 1  
PROCNO 1

F2 - Acquisition Parameters  
Date\_ 20150614  
Time 12.13 h  
INSTRUM spect  
PROBHD Z824601\_0021 (  
PULPROG zgpg30  
TD 65536  
SOLVENT CDC13  
NS 1655  
DS 4  
SWH 24038.461 Hz  
FIDRES 0.366798 Hz  
AQ 1.3631488 sec  
RG 203  
DW 20.800 usec  
DE 6.50 usec  
TE 295.3 K  
D1 2.00000000 sec  
D11 0.03000000 sec  
TD0 1  
SFO1 100.6228298 MHz  
NUC1 13C  
P1 9.50 usec  
PLW1 41.25000000 W  
SFO2 400.1316005 MHz  
NUC2 1H  
CPDPRG[2] waltz16  
PCPD2 90.00 usec  
PLW2 8.31000042 W  
PLW12 0.23083000 W  
PLW13 0.11611000 W

F2 - Processing parameters  
SI 32768  
SF 100.6127557 MHz  
WDW EM  
SSB 0  
LB 1.00 Hz  
GB 0  
PC 1.40

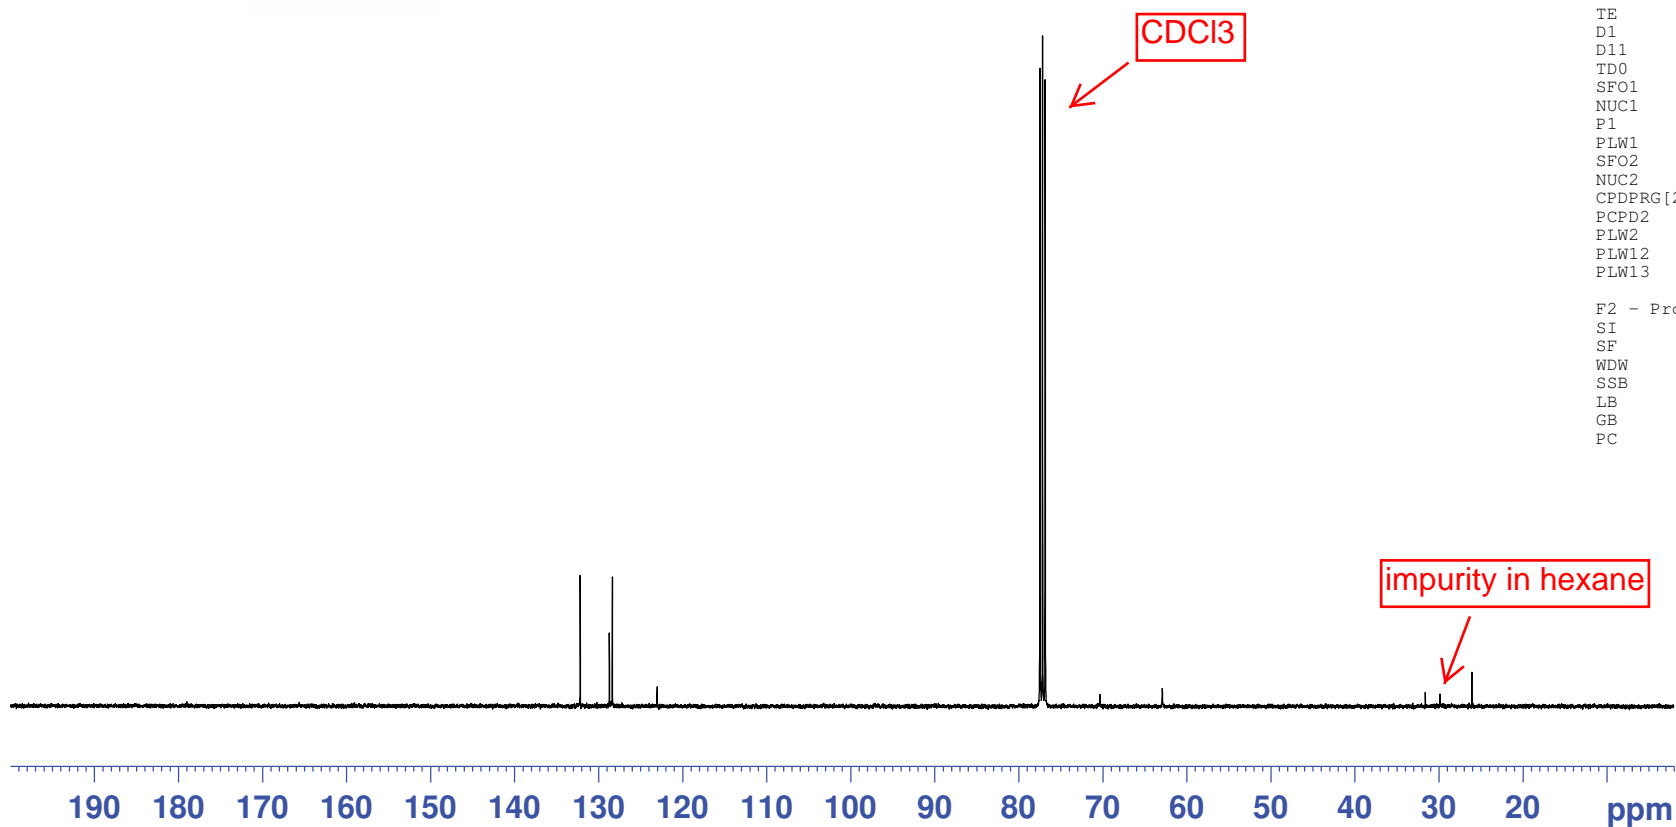

qyj-B-6-2-CDCl3

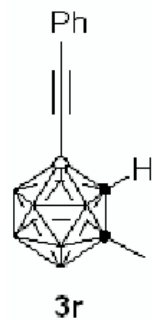

— -0.67  
— -4.62  
— -7.22  
— -8.18  
— -10.12

Current Data Parameters  
NAME qyj-B-6-2-CDCl3  
EXPNO 1  
PROCNO 1

F2 - Acquisition Parameters

Date\_ 20150622  
Time 10.25 h  
INSTRUM spect  
PROBHD Z108618\_0257 (  
PULPROG zgpg30  
TD 65536  
SOLVENT C6D6  
NS 40  
DS 4  
SWH 29761.904 Hz  
FIDRES 0.454131 Hz  
AQ 1.1010048 sec  
RG 512  
DW 16.800 usec  
DE 6.50 usec  
TE 296.8 K  
D1 2.00000000 sec  
D11 0.03000000 sec  
TD0 1  
SFO1 128.4096890 MHz  
NUC1 11B  
P1 7.50 usec  
PLW1 55.09999847 W  
SFO2 400.2316008 MHz  
NUC2 1H  
CPDPRG[2] waltz16  
PCPD2 90.00 usec  
PLW2 13.56000042 W  
PLW12 0.27428001 W  
PLW13 0.13796000 W

F2 - Processing parameters

SI 32768  
SF 128.4095347 MHz  
WDW EM  
SSB 0  
LB 1.00 Hz  
GB 0  
PC 1.40

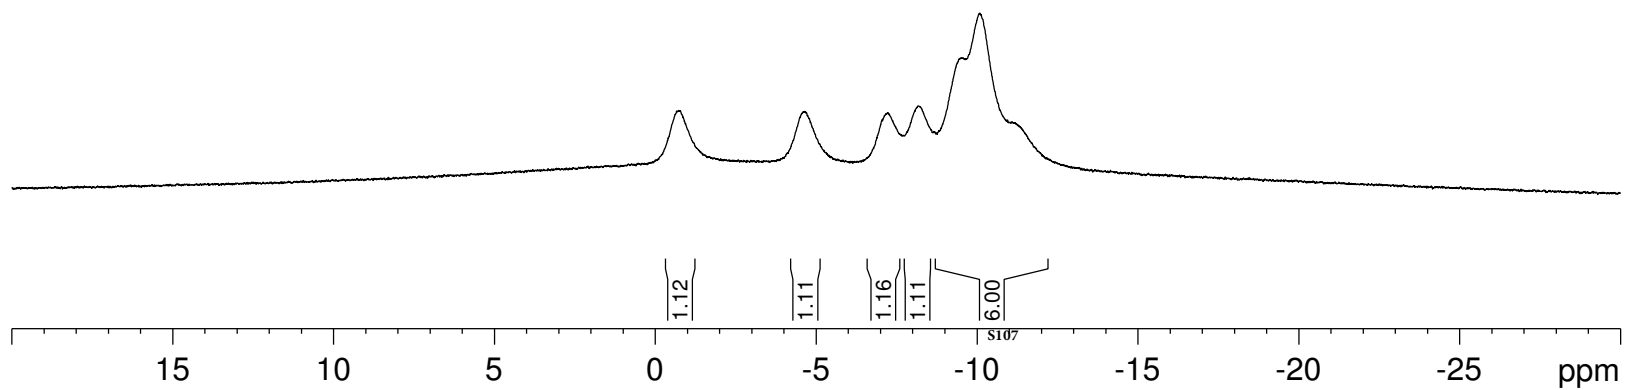

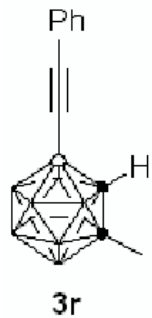

-1.23  
 -2.41  
 -5.19  
 -6.35  
 -7.77  
 -8.86  
 -9.99  
 -11.24  
 -11.84  
 -12.95

qyj-B-6-2-CDC13 (C)

Current Data Parameters  
 NAME qyj-B-6-2-CDC13 (C)  
 EXPNO 1  
 PROCNO 1

F2 - Acquisition Parameters

Date\_ 20150622  
 Time 10.28 h  
 INSTRUM spect  
 PROBHD Z108618\_0257 (  
 PULPROG zg  
 TD 65536  
 SOLVENT C6D6  
 NS 44  
 DS 4  
 SWH 25510.203 Hz  
 FIDRES 0.389255 Hz  
 AQ 1.2845056 sec  
 RG 322  
 DW 19.600 usec  
 DE 6.50 usec  
 TE 296.4 K  
 D1 1.00000000 sec  
 TD0 1  
 SFO1 128.4096891 MHz  
 NUC1 11B  
 P1 7.50 usec  
 PLW1 55.09999847 W

F2 - Processing parameters

SI 32768  
 SF 128.4096891 MHz  
 WDW EM  
 SSB 0  
 LB 1.00 Hz  
 GB 0  
 PC 1.40

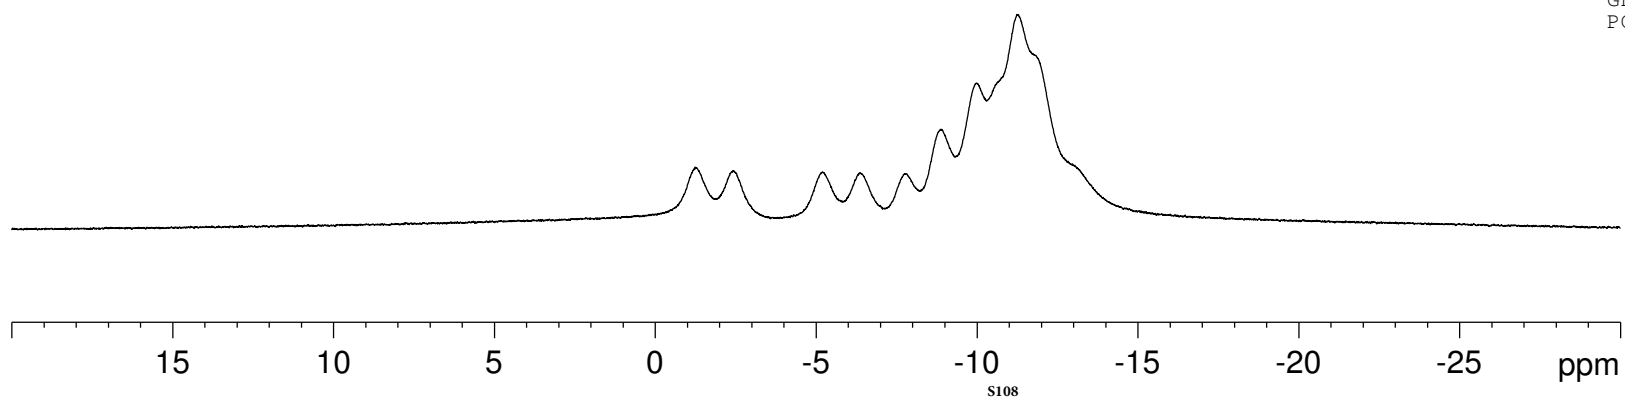

7.421  
7.402  
7.260  
7.232  
7.214  
7.194  
7.188  
7.172  
7.130  
7.111  
7.094

3.850  
2.430  
2.078  
1.563  
1.252

qyj-H-A3-CDC13

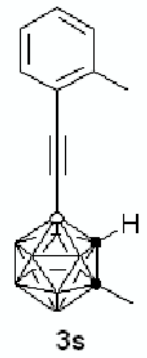

Current Data Parameters  
NAME qyj-H-A3-CDC13  
EXPNO 2  
PROCNO 1

F2 - Acquisition Parameters  
Date\_ 20151228  
Time 17.42 h  
INSTRUM spect  
PROBHD Z108618\_0257 (  
PULPROG zg30  
TD 65536  
SOLVENT CDC13  
NS 14  
DS 2  
SWH 8012.820 Hz  
FIDRES 0.122266 Hz  
AQ 4.0894465 sec  
RG 161  
DW 62.400 usec  
DE 6.50 usec  
TE 295.3 K  
D1 1.00000000 sec  
TD0 1  
SFO1 400.2324714 MHz  
NUC1 1H  
P1 12.80 usec  
PLW1 13.56000042 W

F2 - Processing parameters  
SI 65536  
SF 400.2300107 MHz  
WDW EM  
SSB 0  
LB 0.30 Hz  
GB 0  
PC 1.00

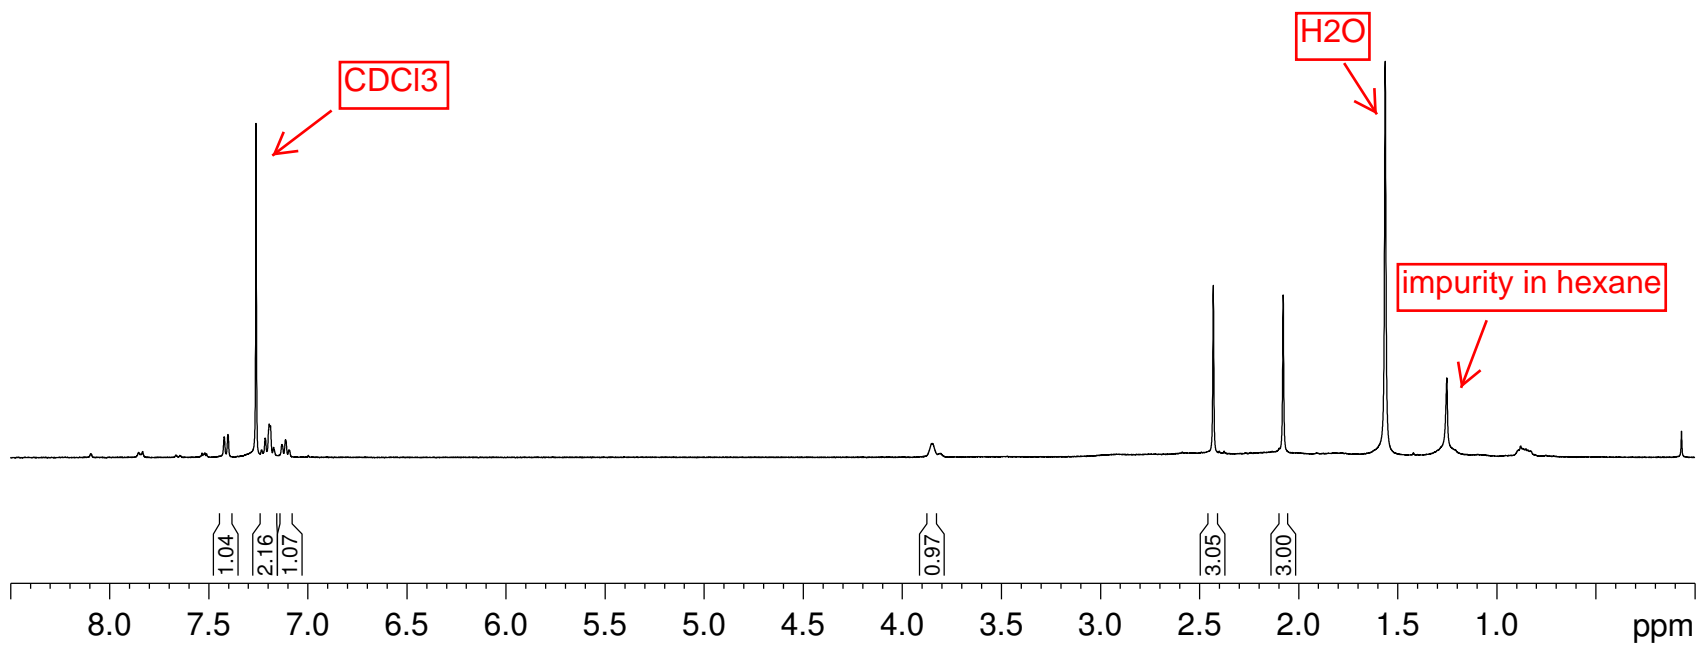

141.05  
132.24  
129.51  
128.71  
125.57  
122.78

77.47  
77.16  
76.84  
70.32  
62.87

29.85  
26.08  
20.76

qyj-C-6-a3-cdcl3

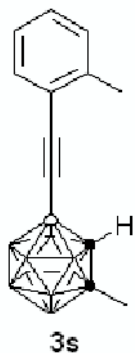

CDC13

impurity in hexane

Current Data Parameters  
NAME qyj-C-6-a3-cdcl3  
EXPNO 1  
PROCNO 1

F2 - Acquisition Parameters  
Date\_ 20160403  
Time 22.17 h  
INSTRUM spect  
PROBHD Z108618\_0257 (  
PULPROG zgpg30  
TD 65536  
SOLVENT CDCl3  
NS 14671  
DS 4  
SWH 29761.904 Hz  
FIDRES 0.454131 Hz  
AQ 1.1010048 sec  
RG 128  
DW 16.800 usec  
DE 6.50 usec  
TE 294.8 K  
D1 2.0000000 sec  
D11 0.0300000 sec  
TD0 1  
SFO1 100.6479773 MHz  
NUC1 13C  
P1 9.50 usec  
PLW1 55.34000015 W  
SFO2 400.2316009 MHz  
NUC2 1H  
CPDPRG[2] waltz16  
PCPD2 90.00 usec  
PLW2 13.56000042 W  
PLW12 0.27428001 W  
PLW13 0.13796000 W

F2 - Processing parameters  
SI 32768  
SF 100.6379006 MHz  
WDW EM  
SSB 0  
LB 1.00 Hz  
GB 0  
PC 1.40

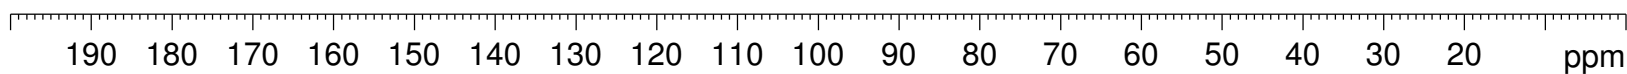

qyj-B-A3-CDC13

— -2.66  
— -6.42  
— -8.94  
— -10.01  
— -11.89  
— -13.39

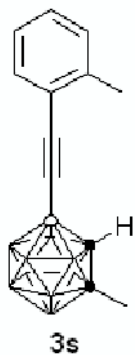

Current Data Parameters  
NAME qyj-B-A3-CDC13  
EXPNO 1  
PROCNO 1

F2 - Acquisition Parameters  
Date\_ 20151228  
Time 17.46 h  
INSTRUM spect  
PROBHD Z108618\_0257 (   
PULPROG zgdc  
TD 65536  
SOLVENT CDC13  
NS 48  
DS 4  
SWH 24038.461 Hz  
FIDRES 0.366798 Hz  
AQ 1.3631488 sec  
RG 456  
DW 20.800 usec  
DE 6.50 usec  
TE 295.8 K  
D1 2.00000000 sec  
D11 0.03000000 sec  
TD0 1  
SFO1 128.4096890 MHz  
NUC1 11B  
P1 7.50 usec  
PLW1 55.09999847 W  
SFO2 400.2316009 MHz  
NUC2 1H  
CPDPRG[2] waltz16  
PCPD2 90.00 usec  
PLW2 13.56000042 W  
PLW12 0.27428001 W

F2 - Processing parameters  
SI 32768  
SF 128.4097615 MHz  
WDW EM  
SSB 0  
LB 1.00 Hz  
GB 0  
PC 1.40

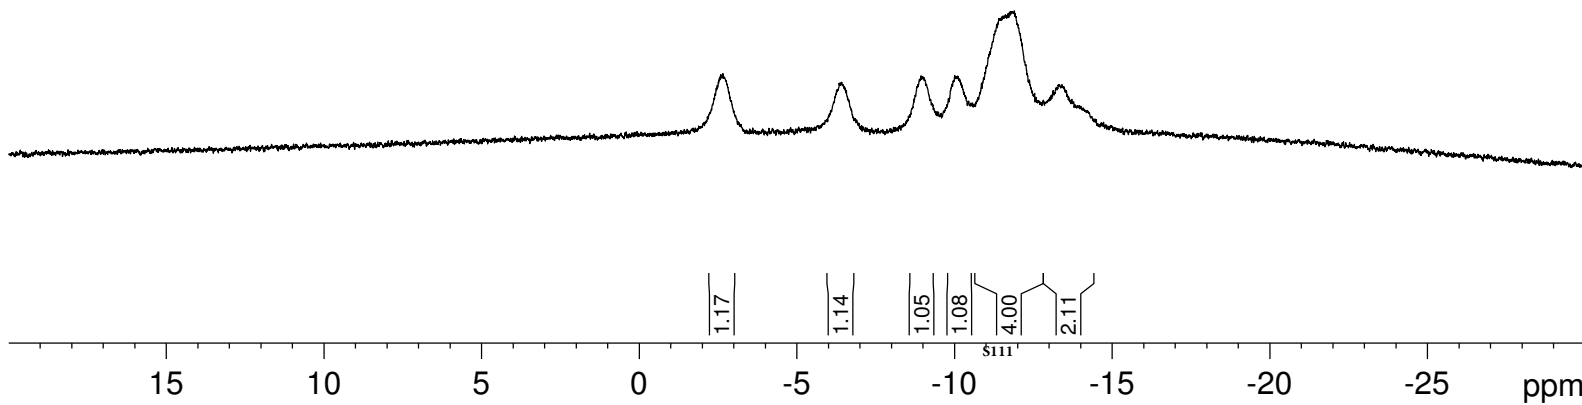

| -1.92  
 | -3.02  
 | -5.66  
 | -6.92  
 | -8.21  
 | -9.39  
 | -10.53  
 | -11.52  
 | -12.44  
 | -13.65

qyj-B-A3-CDCl3 (C)

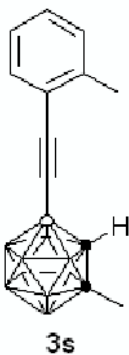

Current Data Parameters

NAME qyj-B-A3-CDCl3 (C)  
 EXPNO 1  
 PROCNO 1

F2 - Acquisition Parameters

Date\_ 20151228  
 Time 17.50 h  
 INSTRUM spect  
 PROBHD Z108618\_0257 (  
 PULPROG zg  
 TD 65536  
 SOLVENT CDCl3  
 NS 60  
 DS 2  
 SWH 24038.461 Hz  
 FIDRES 0.366798 Hz  
 AQ 1.3631488 sec  
 RG 512  
 DW 20.800 usec  
 DE 6.50 usec  
 TE 295.3 K  
 D1 2.00000000 sec  
 TD0 1  
 SFO1 128.4096890 MHz  
 NUC1 11B  
 P1 7.50 usec  
 PLW1 55.09999847 W

F2 - Processing parameters

SI 32768  
 SF 128.4097430 MHz  
 WDW EM  
 SSB 0  
 LB 1.00 Hz  
 GB 0  
 PC 1.40

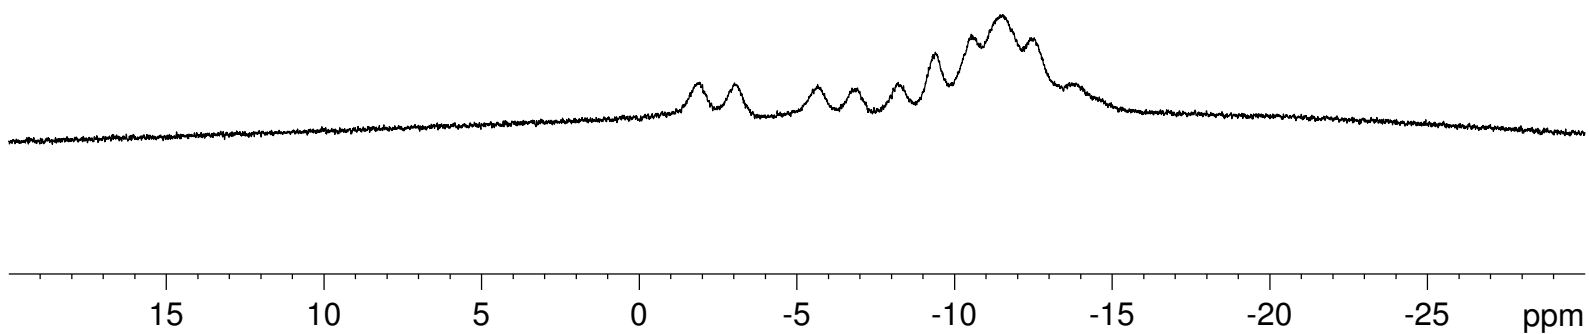



7.260  
7.117  
7.098  
7.080  
7.023  
7.004

3.842

2.423

2.083

1.562

1.253

qyj-H-A5-CDC13

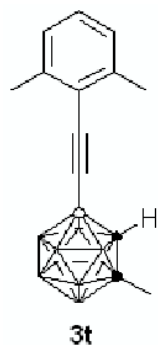

Current Data Parameters  
NAME qyj-H-A5-CDC13  
EXPNO 1  
PROCNO 1

F2 - Acquisition Parameters  
Date\_ 20151231  
Time 9.24 h  
INSTRUM spect  
PROBHD Z108618\_0257 (  
PULPROG zg30  
TD 65536  
SOLVENT CDC13  
NS 12  
DS 2  
SWH 8012.820 Hz  
FIDRES 0.122266 Hz  
AQ 4.0894465 sec  
RG 128  
DW 62.400 usec  
DE 6.50 usec  
TE 295.4 K  
D1 1.00000000 sec  
TD0 1  
SFO1 400.2324714 MHz  
NUC1 1H  
P1 12.80 usec  
PLW1 13.56000042 W

F2 - Processing parameters  
SI 65536  
SF 400.2300101 MHz  
WDW EM  
SSB 0  
LB 0.30 Hz  
GB 0  
PC 1.00

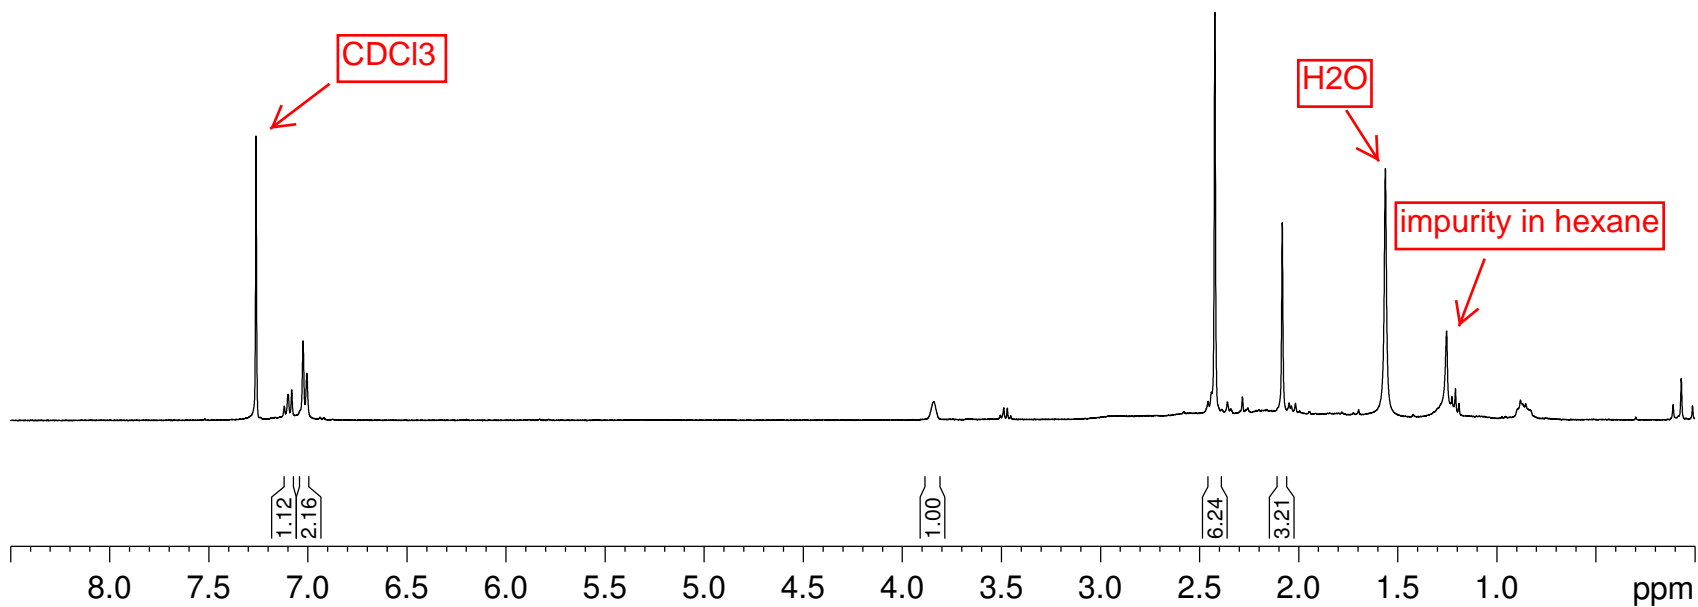

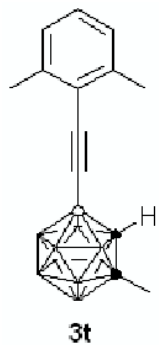

141.01  
 128.09  
 126.72  
 122.79  
 77.47  
 77.15  
 76.84  
 70.31  
 62.93  
 29.90  
 26.13  
 21.14

qyj-C-A5-CDC13

Current Data Parameters  
 NAME qyj-C-A5-CDC13  
 EXPNO 1  
 PROCNO 1

F2 - Acquisition Parameters  
 Date\_ 20151231  
 Time 20.59 h  
 INSTRUM spect  
 PROBHD Z108618\_0257 (  
 PULPROG zgpg30  
 TD 65536  
 SOLVENT CDC13  
 NS 16207  
 DS 4  
 SWH 29761.904 Hz  
 FIDRES 0.454131 Hz  
 AQ 1.1010048 sec  
 RG 203  
 DW 16.800 usec  
 DE 6.50 usec  
 TE 295.2 K  
 D1 2.0000000 sec  
 D11 0.03000000 sec  
 TD0 1  
 SFO1 100.6479773 MHz  
 NUC1 13C  
 P1 9.50 usec  
 PLW1 55.34000015 W  
 SFO2 400.2316009 MHz  
 NUC2 1H  
 CPDPRG[2] waltz16  
 PCPD2 90.00 usec  
 PLW2 13.56000042 W  
 PLW12 0.27428001 W  
 PLW13 0.13796000 W

F2 - Processing parameters  
 SI 32768  
 SF 100.6379006 MHz  
 WDW EM  
 SSB 0  
 LB 1.00 Hz  
 GB 0  
 PC 1.40

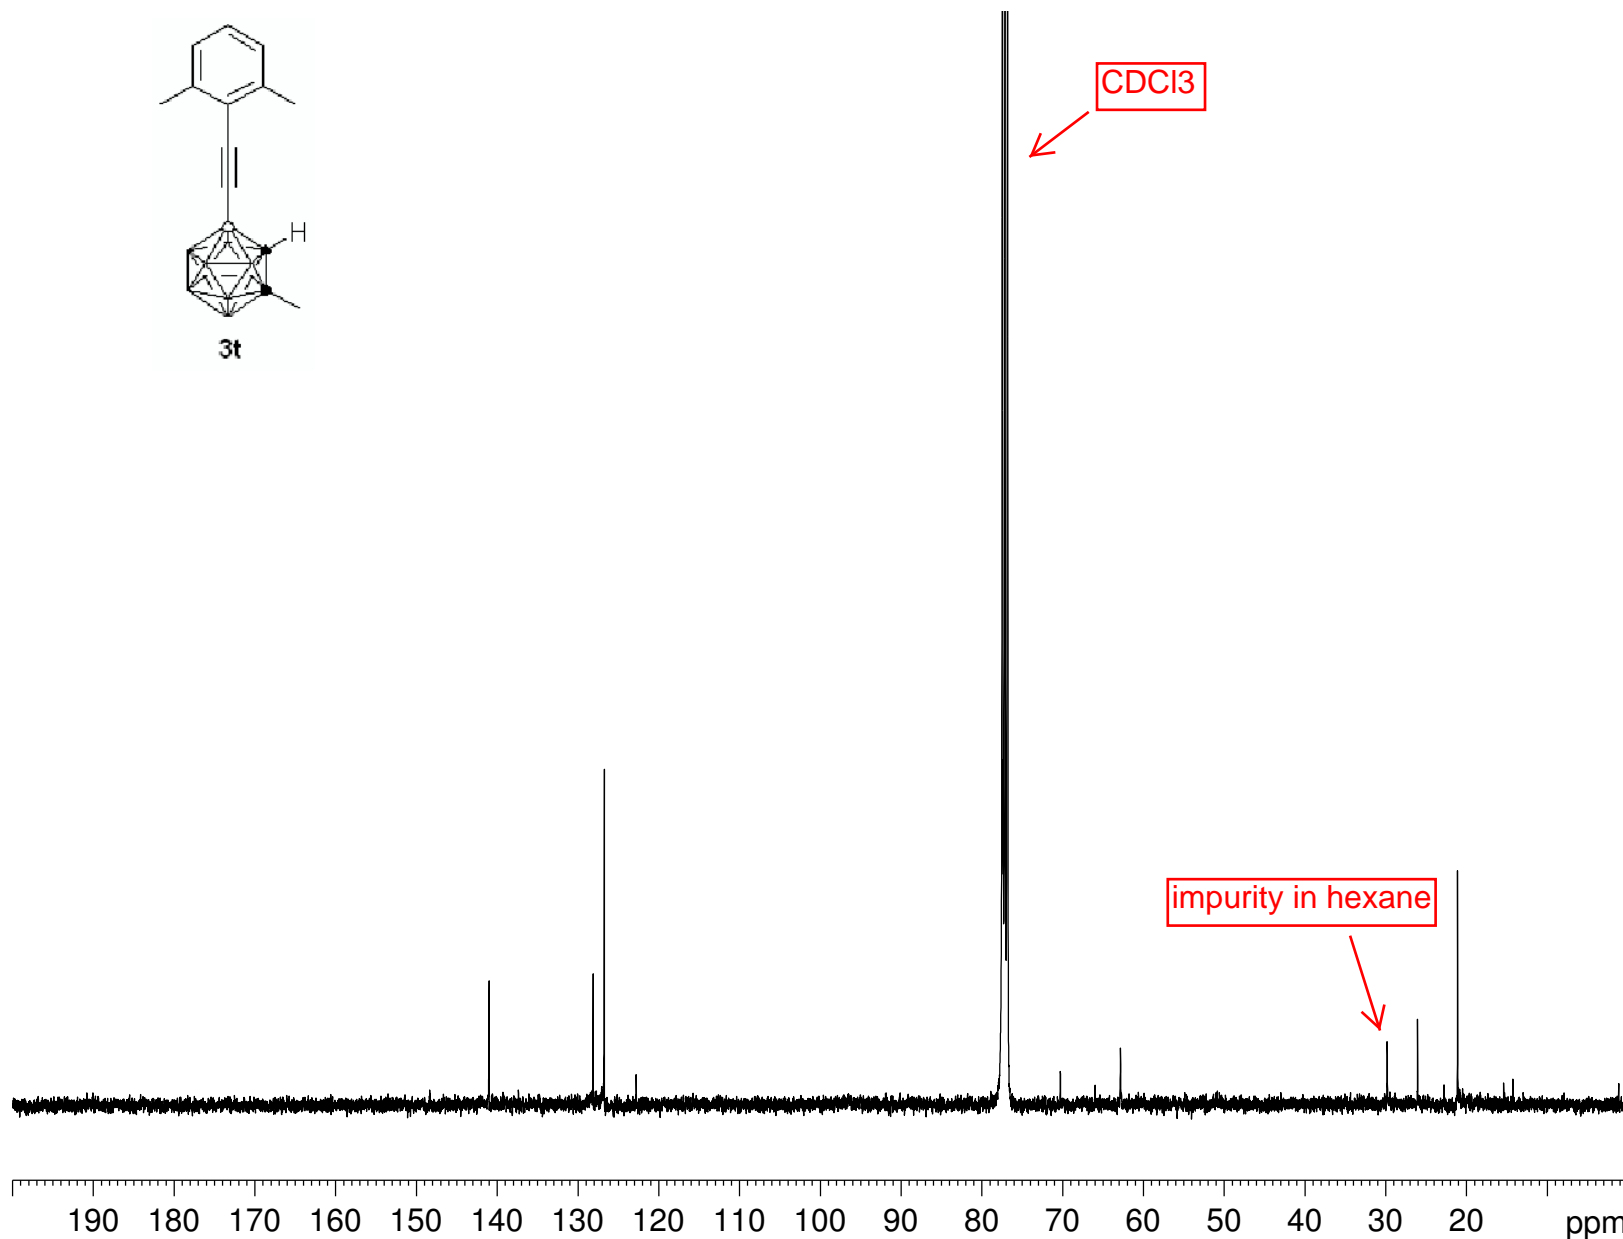

CDCl3

impurity in hexane

qyj-B-A5-CDC13

Current Data Parameters

NAME qyj-B-A5-CDC13  
EXPNO 1  
PROCNO 1

F2 - Acquisition Parameters

Date\_ 20151230  
Time 19.25 h  
INSTRUM spect  
PROBHD Z108618\_0257 (  
PULPROG zgdc  
TD 65536  
SOLVENT CDC13  
NS 32  
DS 4  
SWH 24038.461 Hz  
FIDRES 0.366798 Hz  
AQ 1.3631488 sec  
RG 456  
DW 20.800 usec  
DE 6.50 usec  
TE 295.6 K  
D1 2.00000000 sec  
D11 0.03000000 sec  
TD0 1  
SFO1 128.4096890 MHz  
NUC1 11B  
P1 7.50 usec  
PLW1 55.09999847 W  
SFO2 400.2316009 MHz  
NUC2 1H  
CPDPRG[2] waltz16  
PCPD2 90.00 usec  
PLW2 13.56000042 W  
PLW12 0.27428001 W

F2 - Processing parameters

SI 32768  
SF 128.4097615 MHz  
WDW EM  
SSB 0  
LB 1.00 Hz  
GB 0  
PC 1.40

— -1.30  
— -5.14  
— -7.71  
— -8.87  
— -10.20  
— -12.22

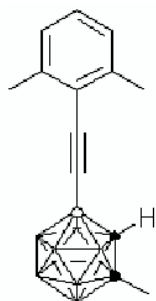

3t

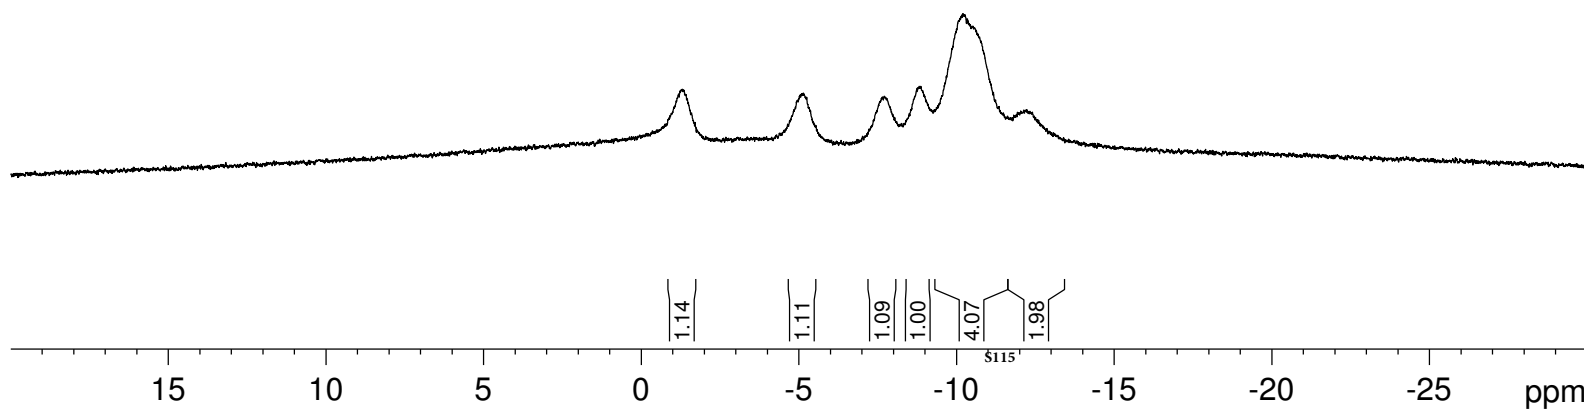

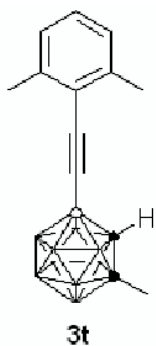

| -0.57  
 | -1.81  
 | -4.40  
 | -5.55  
 | -7.00  
 | -8.12  
 | -9.33  
 | -9.98  
 | -11.23  
 | -12.73

qyj-B-A5-CDCl3 (C)

Current Data Parameters  
 NAME qyj-B-A5-CDCl3 (C)  
 EXPNO 1  
 PROCNO 1

F2 - Acquisition Parameters  
 Date\_ 20151230  
 Time 19.30 h  
 INSTRUM spect  
 PROBHD Z108618\_0257 (  
 PULPROG zg  
 TD 65536  
 SOLVENT CDCl3  
 NS 44  
 DS 2  
 SWH 24038.461 Hz  
 FIDRES 0.366798 Hz  
 AQ 1.3631488 sec  
 RG 512  
 DW 20.800 usec  
 DE 6.50 usec  
 TE 295.5 K  
 D1 2.00000000 sec  
 TD0 1  
 SF01 128.4096890 MHz  
 NUC1 11B  
 P1 7.50 usec  
 PLW1 55.09999847 W

F2 - Processing parameters  
 SI 32768  
 SF 128.4097430 MHz  
 WDW EM  
 SSB 0  
 LB 1.00 Hz  
 GB 0  
 PC 1.40

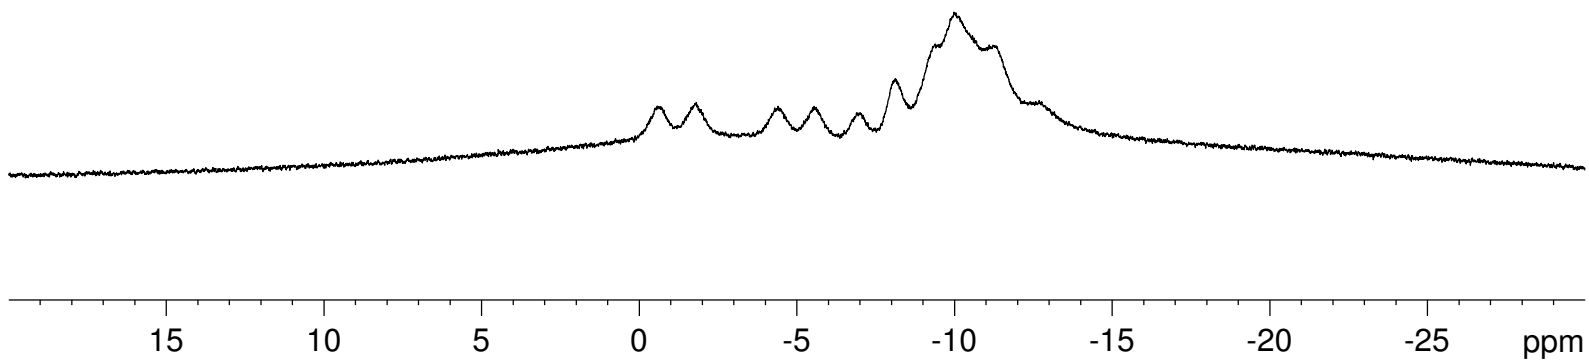

7.427  
7.409  
7.305  
7.286  
7.260  
7.239  
7.131  
7.127  
7.112

3.842

3.432  
3.415  
3.397

2.080

1.570

1.275  
1.257

qyj-H-A6-CDC13

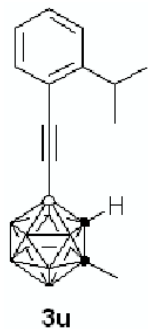

Current Data Parameters  
NAME qyj-H-A6-CDC13  
EXPNO 1  
PROCNO 1

F2 - Acquisition Parameters  
Date\_ 20160105  
Time 9.41 h  
INSTRUM spect  
PROBHD Z108618\_0257 (  
PULPROG zg30  
TD 65536  
SOLVENT CDC13  
NS 11  
DS 2  
SWH 8012.820 Hz  
FIDRES 0.122266 Hz  
AQ 4.0894465 sec  
RG 128  
DW 62.400 usec  
DE 6.50 usec  
TE 295.1 K  
D1 1.00000000 sec  
TD0 1  
SFO1 400.2324714 MHz  
NUC1 1H  
P1 12.80 usec  
PLW1 13.56000042 W

F2 - Processing parameters  
SI 65536  
SF 400.2300105 MHz  
WDW EM  
SSB 0  
LB 0.30 Hz  
GB 0  
PC 1.00

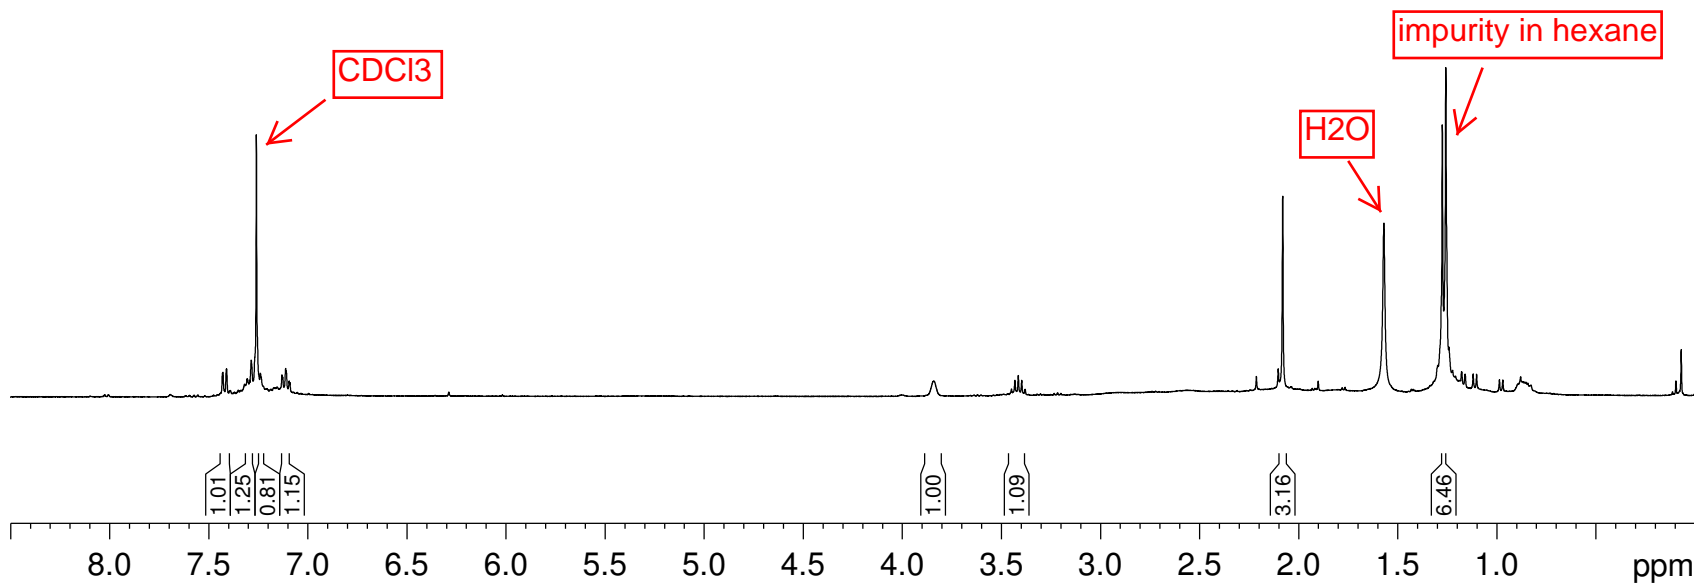

qyj-C-A6-CDC13

Current Data Parameters  
NAME qyj-C-A6-CDC13  
EXPNO 1  
PROCNO 1

F2 - Acquisition Parameters  
Date\_ 20160105  
Time 10.05 h  
INSTRUM spect  
PROBHD Z108618\_0257 (  
PULPROG zgpg30  
TD 65536  
SOLVENT CDC13  
NS 1095  
DS 4  
SWH 29761.904 Hz  
FIDRES 0.454131 Hz  
AQ 1.1010048 sec  
RG 181  
DW 16.800 usec  
DE 6.50 usec  
TE 295.2 K  
D1 2.0000000 sec  
D11 0.0300000 sec  
TD0 1  
SFO1 100.6479773 MHz  
NUC1 13C  
P1 9.50 usec  
PLW1 55.34000015 W  
SFO2 400.2316009 MHz  
NUC2 1H  
CPDPRG[2] waltz16  
PCPD2 90.00 usec  
PLW2 13.56000042 W  
PLW12 0.27428001 W  
PLW13 0.13796000 W

F2 - Processing parameters  
SI 32768  
SF 100.6379006 MHz  
WDW EM  
SSB 0  
LB 1.00 Hz  
GB 0  
PC 1.40

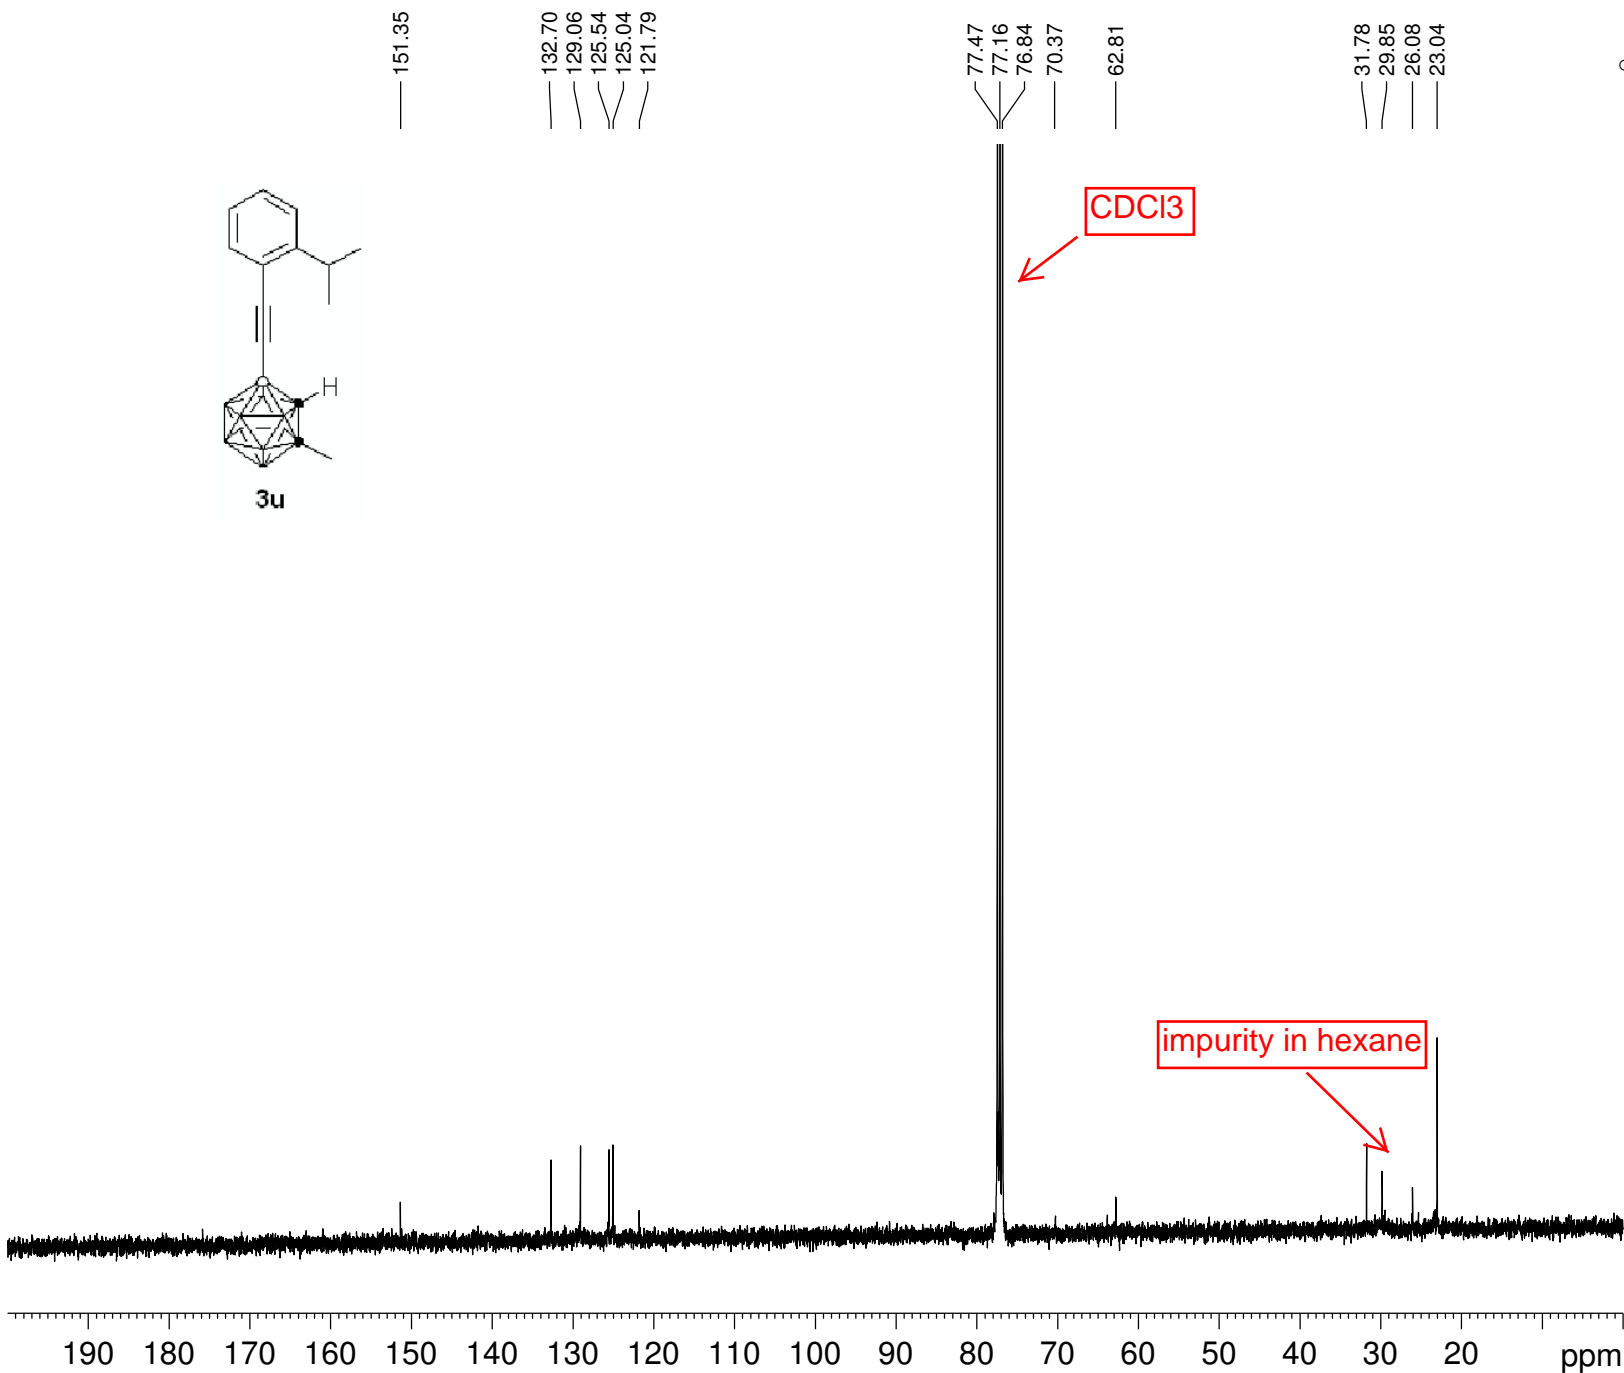

qyj-B-A6-CDC13

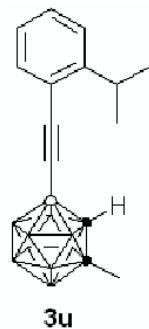

— -2.61  
— -6.41  
— -8.99  
— -10.09  
— -11.47  
— -13.37

Current Data Parameters  
NAME qyj-B-A6-CDC13  
EXPNO 1  
PROCNO 1

F2 - Acquisition Parameters  
Date\_ 20160105  
Time 9.47 h  
INSTRUM spect  
PROBHD Z108618\_0257 (   
PULPROG zgdc  
TD 65536  
SOLVENT CDC13  
NS 48  
DS 4  
SWH 24038.461 Hz  
FIDRES 0.366798 Hz  
AQ 1.3631488 sec  
RG 456  
DW 20.800 usec  
DE 6.50 usec  
TE 295.6 K  
D1 2.00000000 sec  
D11 0.03000000 sec  
TD0 1  
SFO1 128.4096890 MHz  
NUC1 11B  
P1 7.50 usec  
PLW1 55.09999847 W  
SFO2 400.2316009 MHz  
NUC2 1H  
CPDPRG[2] waltz16  
PCPD2 90.00 usec  
PLW2 13.56000042 W  
PLW12 0.27428001 W

F2 - Processing parameters  
SI 32768  
SF 128.4097615 MHz  
WDW EM  
SSB 0  
LB 1.00 Hz  
GB 0  
PC 1.40

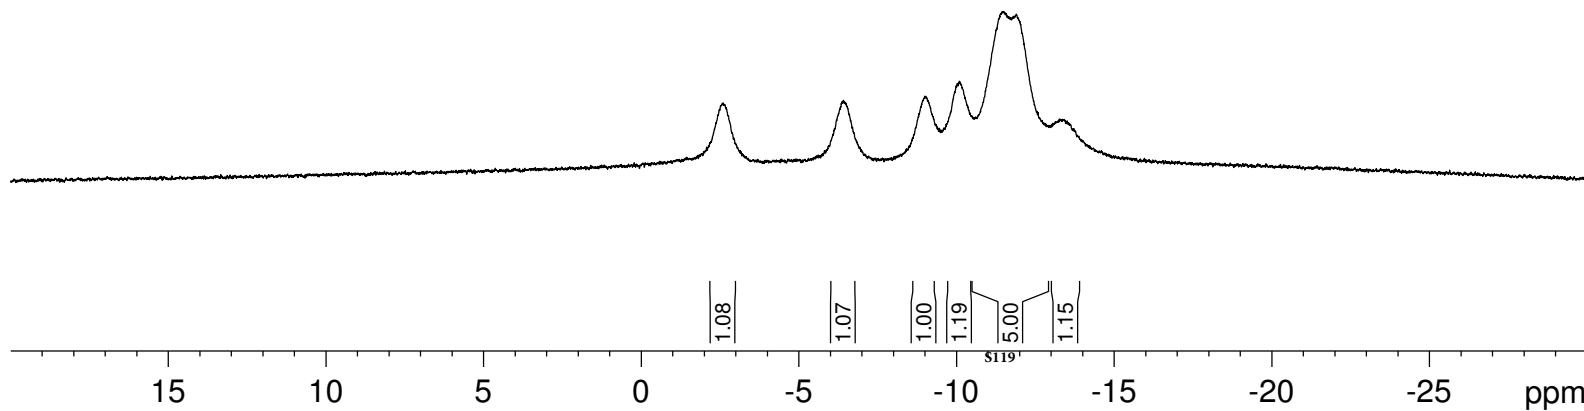

| -1.87  
 | -3.00  
 | -5.67  
 | -6.85  
 | -8.25  
 | -9.42  
 | -10.59  
 | -11.37  
 | -12.43  
 | -13.83

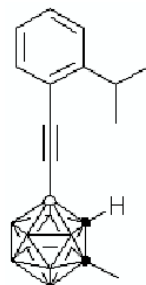

**3u**

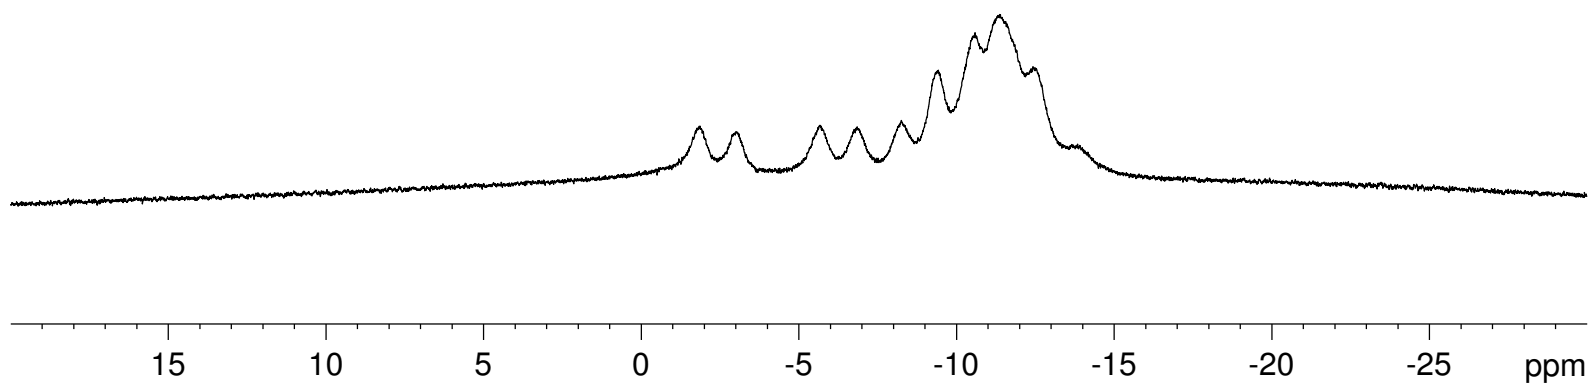

qyj-B-A6-CDCl3 (C)

Current Data Parameters

NAME qyj-B-A6-CDCl3 (C)  
 EXPNO 1  
 PROCNO 1

F2 - Acquisition Parameters

Date\_ 20160105  
 Time 9.48 h  
 INSTRUM spect  
 PROBHD Z108618\_0257 (  
 PULPROG zg  
 TD 65536  
 SOLVENT CDCl3  
 NS 48  
 DS 2  
 SWH 24038.461 Hz  
 FIDRES 0.366798 Hz  
 AQ 1.3631488 sec  
 RG 512  
 DW 20.800 usec  
 DE 6.50 usec  
 TE 295.1 K  
 D1 2.00000000 sec  
 TD0 1  
 SFO1 128.4096890 MHz  
 NUC1 11B  
 P1 7.50 usec  
 PLW1 55.09999847 W

F2 - Processing parameters

SI 32768  
 SF 128.4097430 MHz  
 WDW EM  
 SSB 0  
 LB 1.00 Hz  
 GB 0  
 PC 1.40



7.260

3.814

2.339  
2.318  
2.296  
2.062

1.573  
1.541  
1.520  
1.500  
1.297  
1.255  
0.891  
0.874

qyj-H-A7-CDC13

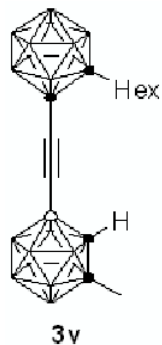

Current Data Parameters  
 NAME qyj-H-A7-CDC13  
 EXPNO 1  
 PROCNO 1

F2 - Acquisition Parameters  
 Date\_ 20160106  
 Time 13.50 h  
 INSTRUM spect  
 PROBHD Z108618\_0257 (  
 PULPROG zg30  
 TD 65536  
 SOLVENT CDC13  
 NS 12  
 DS 2  
 SWH 8012.820 Hz  
 FIDRES 0.122266 Hz  
 AQ 4.0894465 sec  
 RG 57  
 DW 62.400 usec  
 DE 6.50 usec  
 TE 295.4 K  
 D1 1.00000000 sec  
 TD0 1  
 SFO1 400.2324714 MHz  
 NUC1 1H  
 P1 12.80 usec  
 PLW1 13.56000042 W

F2 - Processing parameters  
 SI 65536  
 SF 400.2300102 MHz  
 WDW EM  
 SSB 0  
 LB 0.30 Hz  
 GB 0  
 PC 1.00

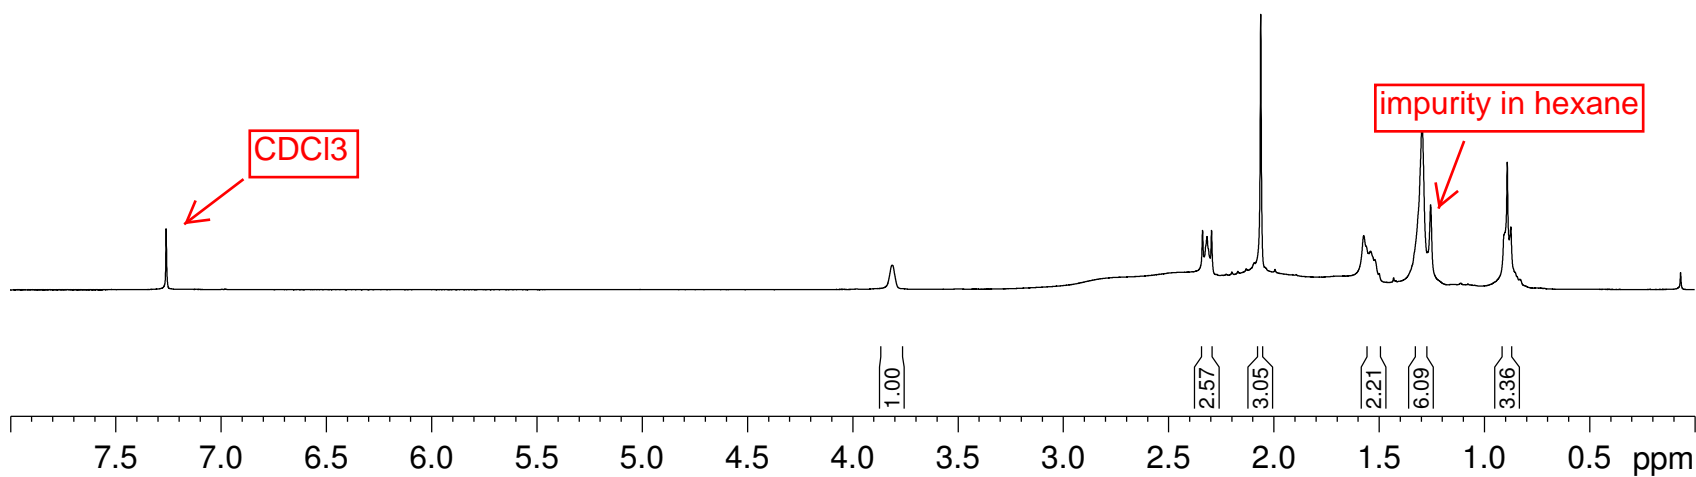

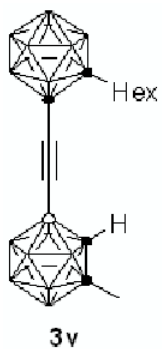

82.28  
77.47  
77.36  
77.15  
76.83  
70.83  
66.76  
62.63

36.16  
31.45  
29.70  
28.97  
25.98  
22.65  
14.14

qyj-C-A7-CDC13

Current Data Parameters  
NAME qyj-C-A7-CDC13  
EXPNO 1  
PROCNO 1

F2 - Acquisition Parameters  
Date\_ 20160106  
Time 13.59 h  
INSTRUM spect  
PROBHD Z108618\_0257 (  
PULPROG zgpg30  
TD 65536  
SOLVENT CDC13  
NS 548  
DS 4  
SWH 29761.904 Hz  
FIDRES 0.454131 Hz  
AQ 1.1010048 sec  
RG 181  
DW 16.800 usec  
DE 6.50 usec  
TE 295.3 K  
D1 2.0000000 sec  
D11 0.0300000 sec  
TD0 1  
SFO1 100.6479773 MHz  
NUC1 13C  
P1 9.50 usec  
PLW1 55.3400015 W  
SFO2 400.2316009 MHz  
NUC2 1H  
CPDPRG[2] waltz16  
PCPD2 90.00 usec  
PLW2 13.56000042 W  
PLW12 0.27428001 W  
PLW13 0.13796000 W

F2 - Processing parameters  
SI 32768  
SF 100.6379015 MHz  
WDW EM  
SSB 0  
LB 1.00 Hz  
GB 0  
PC 1.40

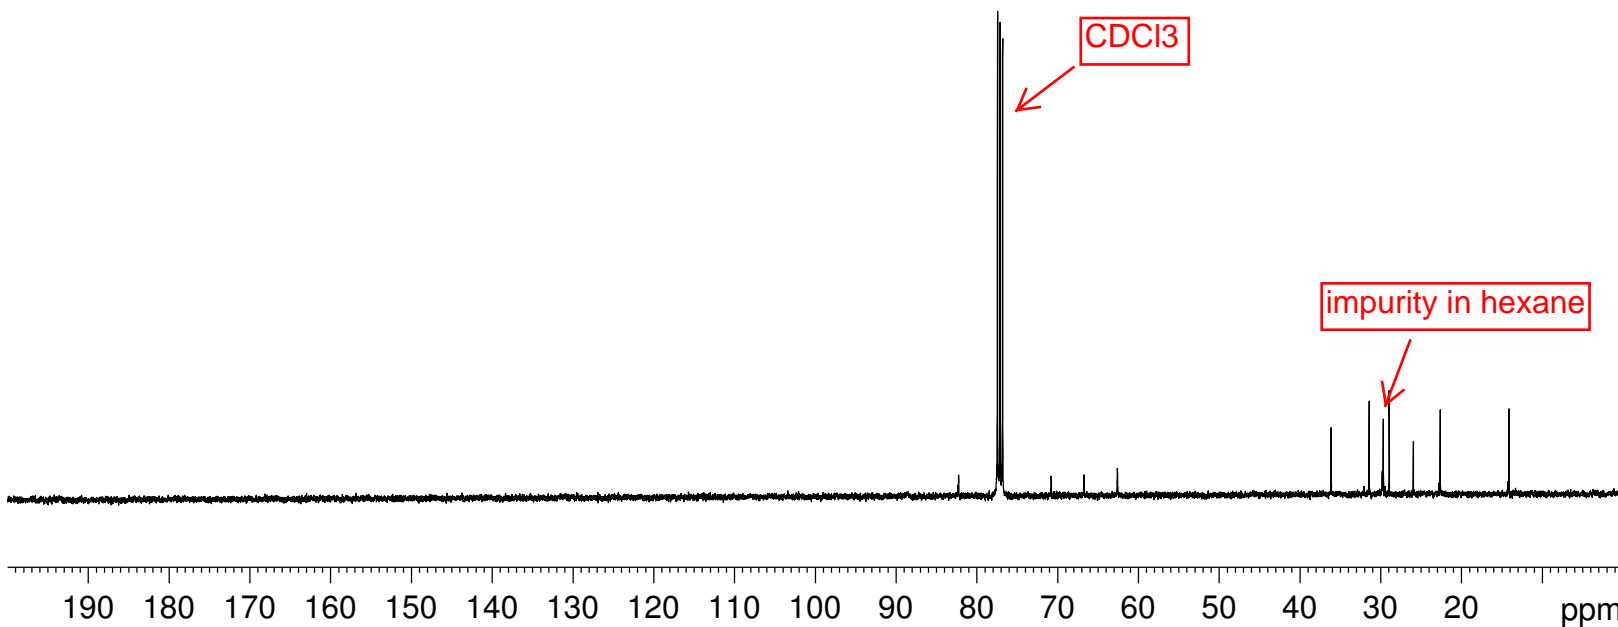

qyj-B-A7-CDC13

— -2.12  
— -3.20  
— -6.32  
— -9.07  
— -9.78  
— -10.29  
— -11.21  
— -11.89  
— -13.53

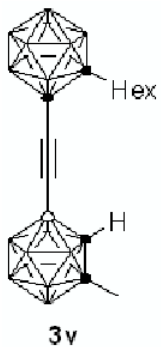

Current Data Parameters  
NAME qyj-B-A7-CDC13  
EXPNO 1  
PROCNO 1

F2 - Acquisition Parameters  
Date\_ 20160106  
Time 13.54 h  
INSTRUM spect  
PROBHD Z108618\_0257 (   
PULPROG zgdc  
TD 65536  
SOLVENT CDC13  
NS 21  
DS 4  
SWH 24038.461 Hz  
FIDRES 0.366798 Hz  
AQ 1.3631488 sec  
RG 287  
DW 20.800 usec  
DE 6.50 usec  
TE 295.9 K  
D1 2.00000000 sec  
D11 0.03000000 sec  
TD0 1  
SFO1 128.4096890 MHz  
NUC1 11B  
P1 7.50 usec  
PLW1 55.09999847 W  
SFO2 400.2316009 MHz  
NUC2 1H  
CPDPRG[2] waltz16  
PCPD2 90.00 usec  
PLW2 13.56000042 W  
PLW12 0.27428001 W

F2 - Processing parameters  
SI 32768  
SF 128.4097615 MHz  
WDW EM  
SSB 0  
LB 1.00 Hz  
GB 0  
PC 1.40

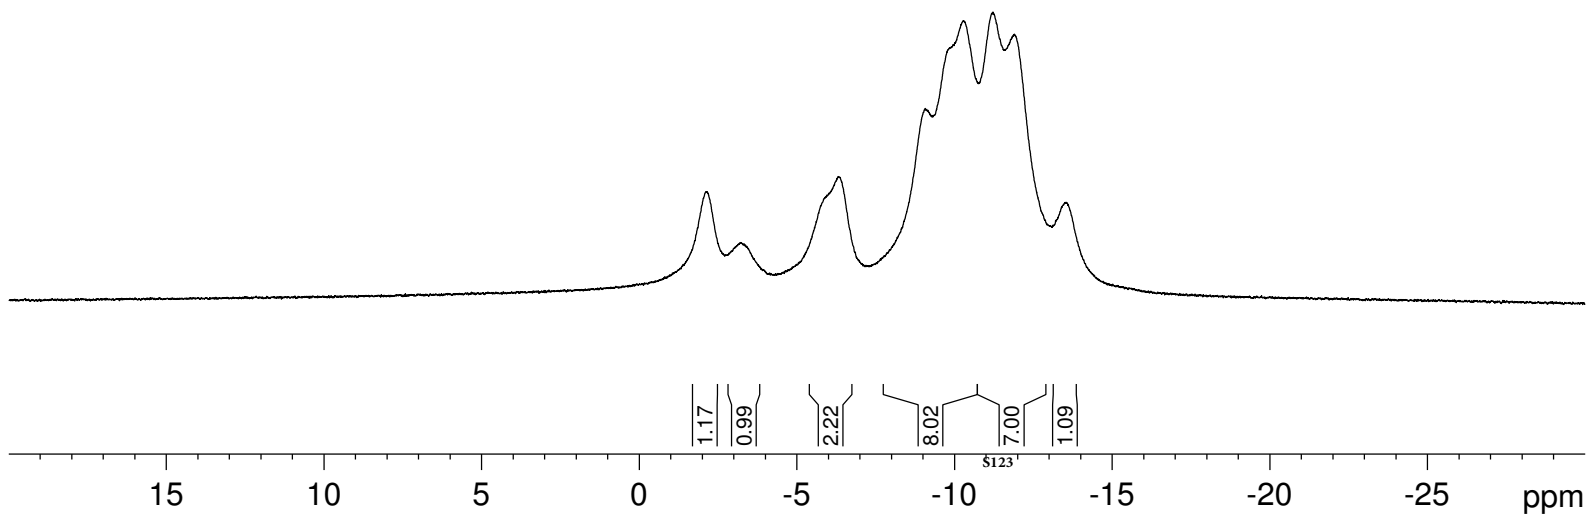

| -1.42  
 | -2.60  
 | -3.71  
 | -5.07  
 | -5.63  
 | -6.82  
 | -8.38  
 | -9.58  
 | -10.41  
 | -10.78  
 | -11.64  
 | -12.36  
 | -13.37

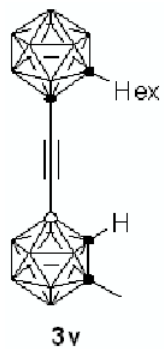

qyj-B-A7-CDCl3 (C)

Current Data Parameters  
 NAME qyj-B-A7-CDCl3 (C)  
 EXPNO 1  
 PROCNO 1

F2 - Acquisition Parameters  
 Date\_ 20160106  
 Time 13.58 h  
 INSTRUM spect  
 PROBHD Z108618\_0257 (  
 PULPROG zg  
 TD 65536  
 SOLVENT CDCl3  
 NS 51  
 DS 2  
 SWH 24038.461 Hz  
 FIDRES 0.366798 Hz  
 AQ 1.3631488 sec  
 RG 287  
 DW 20.800 usec  
 DE 6.50 usec  
 TE 295.2 K  
 D1 2.00000000 sec  
 TD0 1  
 SFO1 128.4096890 MHz  
 NUC1 11B  
 P1 7.50 usec  
 PLW1 55.09999847 W

F2 - Processing parameters  
 SI 32768  
 SF 128.4097430 MHz  
 WDW EM  
 SSB 0  
 LB 1.00 Hz  
 GB 0  
 PC 1.40

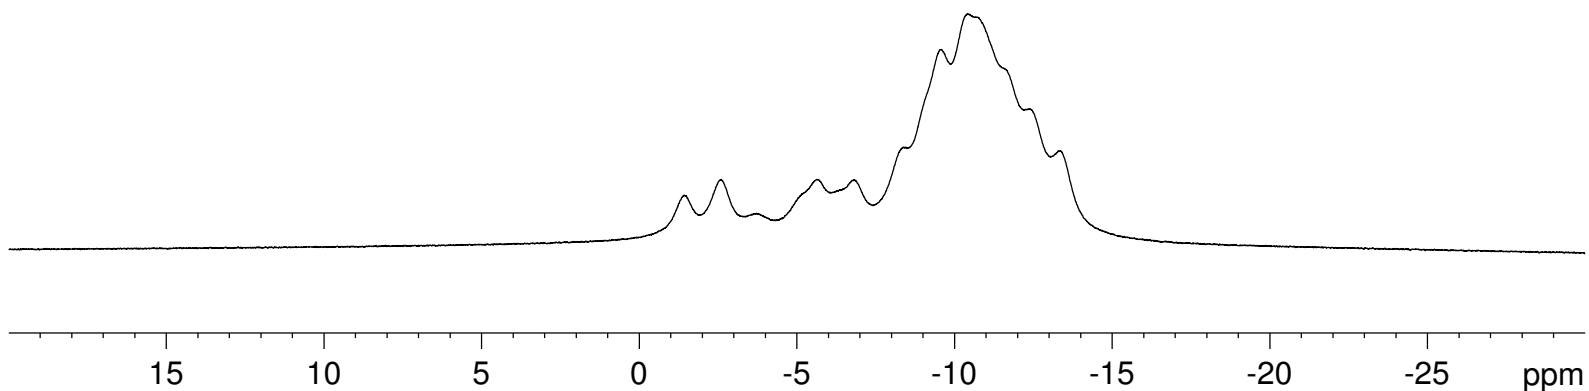

7.360  
7.341  
7.260  
7.110  
7.090

3.848

2.340

2.068

1.576

1.255

qyj-H-6-8a-CDCl3

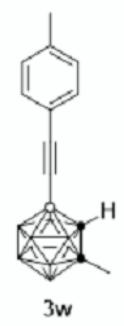

Current Data Parameters  
NAME qyj-H-6-8a-CDCl3  
EXPNO 1  
PROCNO 1

F2 - Acquisition Parameters  
Date\_ 20160413  
Time 14.18 h  
INSTRUM spect  
PROBHD Z108618\_0257 (  
PULPROG zg30  
TD 65536  
SOLVENT CDCl3  
NS 8  
DS 2  
SWH 8012.820 Hz  
FIDRES 0.122266 Hz  
AQ 4.0894465 sec  
RG 128  
DW 62.400 usec  
DE 6.50 usec  
TE 294.6 K  
D1 1.00000000 sec  
TD0 1  
SFO1 400.2324714 MHz  
NUC1 1H  
P1 12.80 usec  
PLW1 13.56000042 W

F2 - Processing parameters  
SI 65536  
SF 400.2300102 MHz  
WDW EM  
SSB 0  
LB 0.30 Hz  
GB 0  
PC 1.00

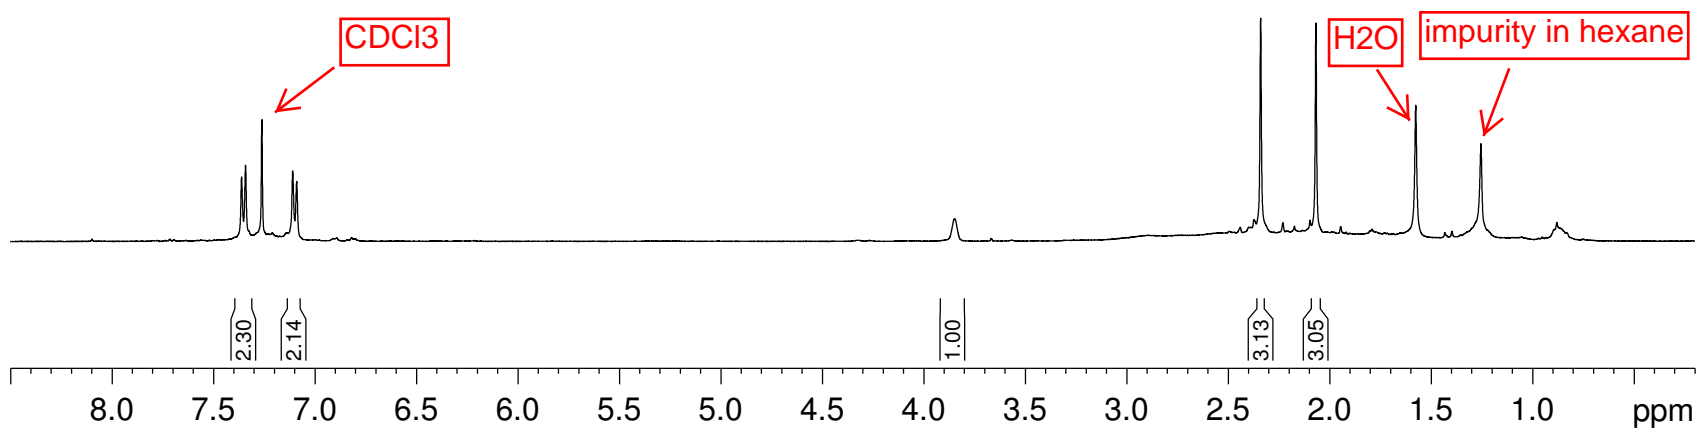

138.88  
132.07  
129.11  
119.93

77.47  
77.16  
76.84  
70.27  
62.90

29.84  
26.05  
21.66

qyj-C-6-8a-CDC13

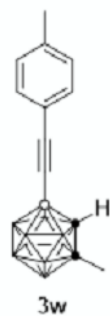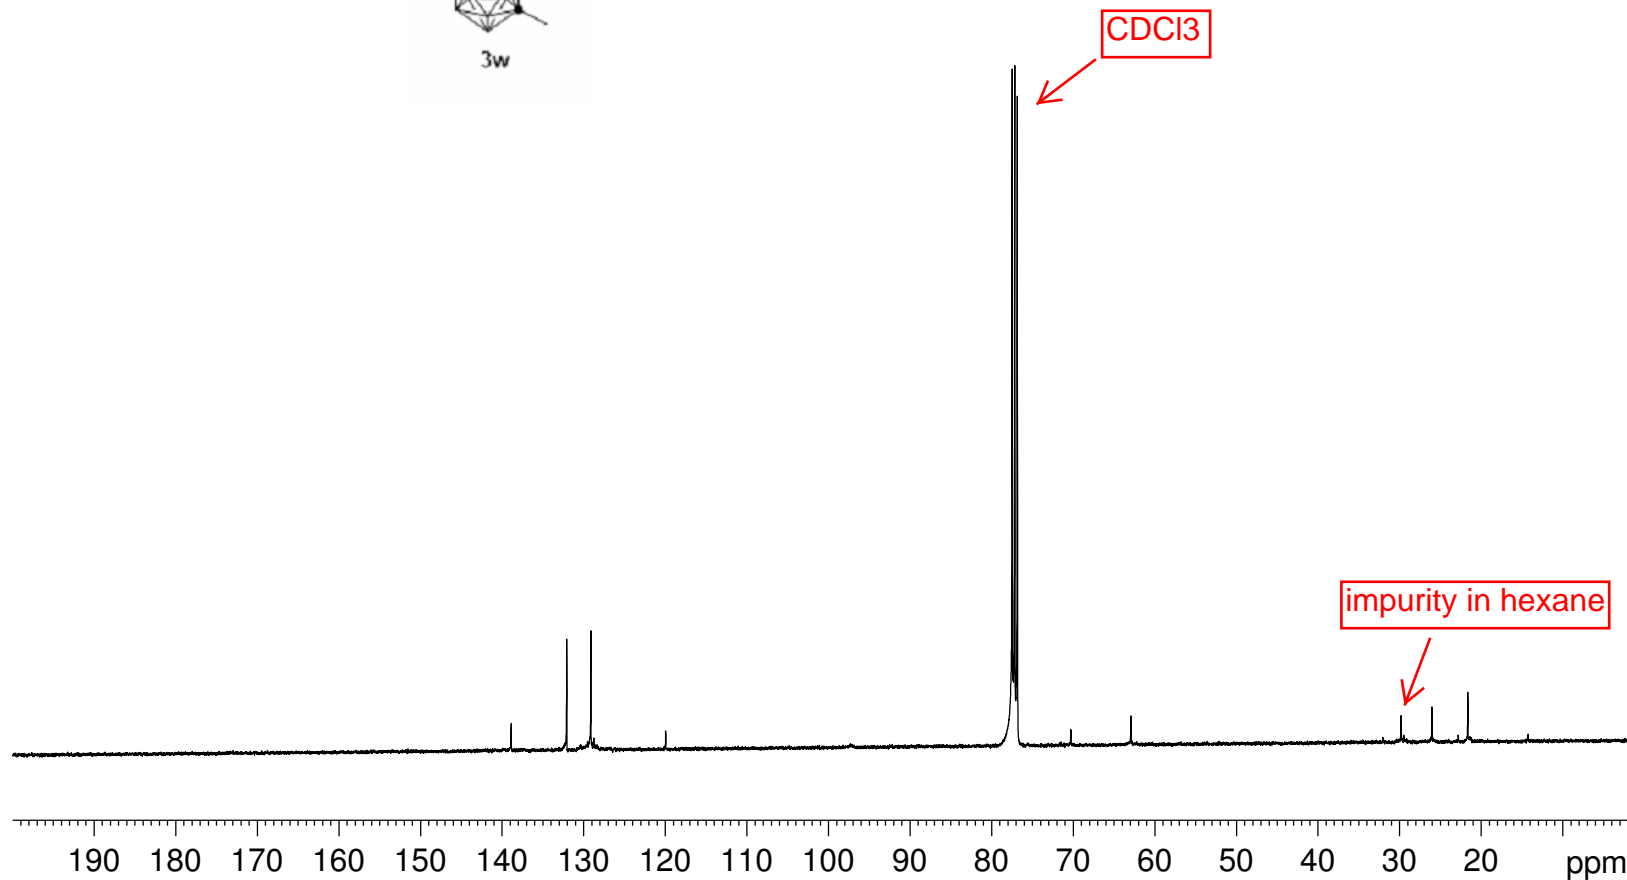

Current Data Parameters  
NAME qyj-C-6-8a-CDC13  
EXPNO 1  
PROCNO 1

F2 - Acquisition Parameters  
Date\_ 20160417  
Time 20.23 h  
INSTRUM spect  
PROBHD Z108618\_0257 (  
PULPROG zgpg30  
TD 65536  
SOLVENT CDC13  
NS 14448  
DS 4  
SWH 29761.904 Hz  
FIDRES 0.454131 Hz  
AQ 1.1010048 sec  
RG 128  
DW 16.800 usec  
DE 6.50 usec  
TE 295.1 K  
D1 2.0000000 sec  
D11 0.0300000 sec  
TD0 1  
SFO1 100.6479773 MHz  
NUC1 13C  
P1 9.50 usec  
PLW1 55.34000015 W  
SFO2 400.2316009 MHz  
NUC2 1H  
CPDPRG[2] waltz16  
PCPD2 90.00 usec  
PLW2 13.56000042 W  
PLW12 0.27428001 W  
PLW13 0.13796000 W

F2 - Processing parameters  
SI 32768  
SF 100.6379015 MHz  
WDW EM  
SSB 0  
LB 1.00 Hz  
GB 0  
PC 1.40

qyj-B-6-8a-CDC13

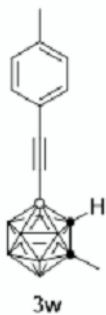

— -2.32  
— -6.19  
— -8.77  
— -9.85  
— -11.56

Current Data Parameters  
NAME qyj-B-6-8a-CDC13  
EXPNO 1  
PROCNO 1

F2 - Acquisition Parameters  
Date\_ 20160413  
Time 14.02 h  
INSTRUM spect  
PROBHD Z108618\_0257 ( )  
PULPROG zgdc  
TD 65536  
SOLVENT CDC13  
NS 20  
DS 4  
SWH 24038.461 Hz  
FIDRES 0.366798 Hz  
AQ 1.3631488 sec  
RG 287  
DW 20.800 usec  
DE 6.50 usec  
TE 295.3 K  
D1 2.00000000 sec  
D11 0.03000000 sec  
TD0 1  
SFO1 128.4096890 MHz  
NUC1 11B  
P1 7.50 usec  
PLW1 55.09999847 W  
SFO2 400.2316009 MHz  
NUC2 1H  
CPDPRG[2] waltz16  
PCPD2 90.00 usec  
PLW2 13.56000042 W  
PLW12 0.27428001 W

F2 - Processing parameters  
SI 32768  
SF 128.4097615 MHz  
WDW EM  
SSB 0  
LB 1.00 Hz  
GB 0  
PC 1.40

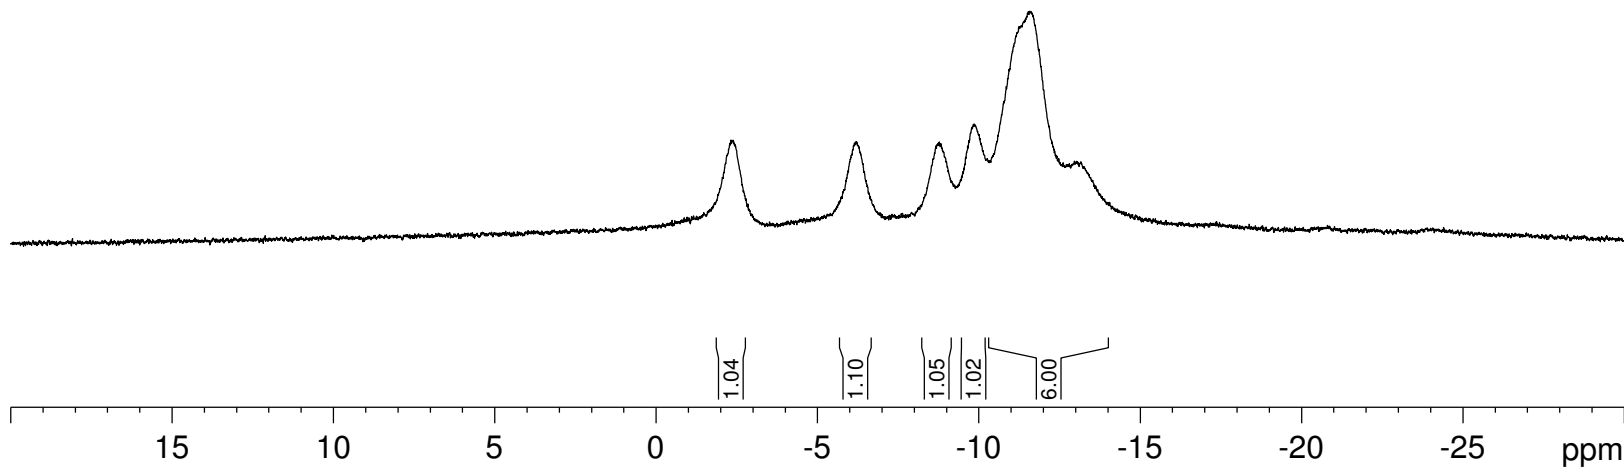

| -1.56  
 | -2.77  
 | -5.46  
 | -6.60  
 | -7.95  
 | -9.15  
 | -10.34  
 | -11.22  
 | -12.09  
 | -13.48

qyj-B-6-8a-CDC13 (c)

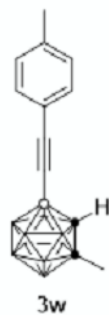

Current Data Parameters  
 NAME qyj-B-6-8a-CDC13 (c)  
 EXPNO 1  
 PROCNO 1

F2 - Acquisition Parameters  
 Date\_ 20160413  
 Time 14.05 h  
 INSTRUM spect  
 PROBHD Z108618\_0257 (  
 PULPROG zg  
 TD 65536  
 SOLVENT CDC13  
 NS 20  
 DS 2  
 SWH 24038.461 Hz  
 FIDRES 0.366798 Hz  
 AQ 1.3631488 sec  
 RG 287  
 DW 20.800 usec  
 DE 6.50 usec  
 TE 295.1 K  
 D1 2.00000000 sec  
 TD0 1  
 SFO1 128.4096890 MHz  
 NUC1 11B  
 P1 7.50 usec  
 PLW1 55.09999847 W

F2 - Processing parameters  
 SI 32768  
 SF 128.4097430 MHz  
 WDW EM  
 SSB 0  
 LB 1.00 Hz  
 GB 0  
 PC 1.40

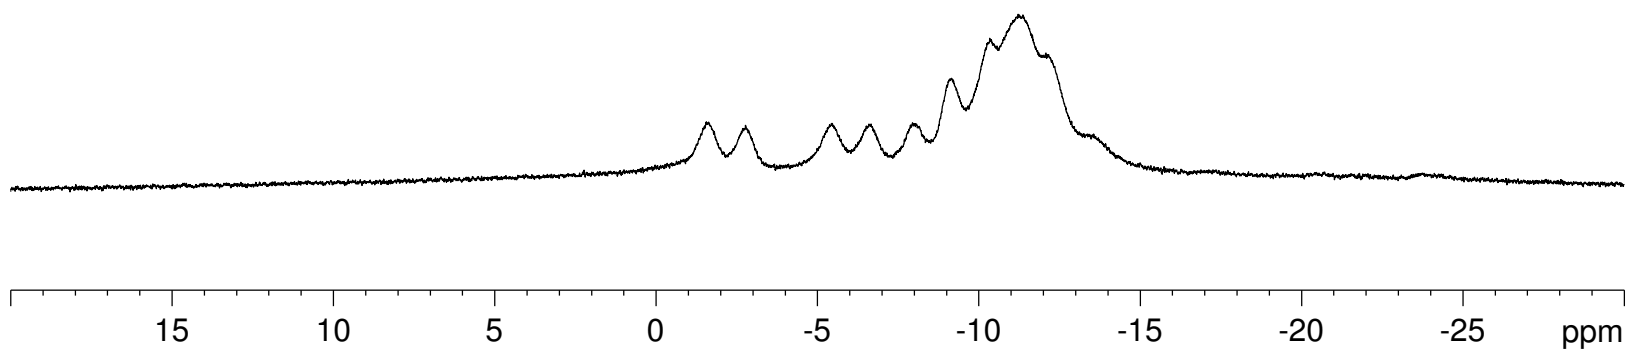



7.557

7.260

3.870

2.083

1.569

1.252

qyj-H-6-9-CDC13

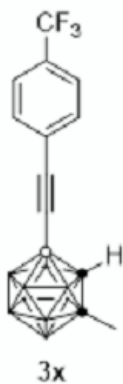

Current Data Parameters  
 NAME qyj-H-6-9-CDC13  
 EXPNO 1  
 PROCNO 1

F2 - Acquisition Parameters  
 Date\_ 20160420  
 Time 16.48 h  
 INSTRUM spect  
 PROBHD Z108618\_0257 (  
 PULPROG zg30  
 TD 65536  
 SOLVENT CDC13  
 NS 12  
 DS 2  
 SWH 8012.820 Hz  
 FIDRES 0.122266 Hz  
 AQ 4.0894465 sec  
 RG 128  
 DW 62.400 usec  
 DE 6.50 usec  
 TE 294.4 K  
 D1 1.00000000 sec  
 TD0 1  
 SFO1 400.2324714 MHz  
 NUC1 1H  
 P1 12.80 usec  
 PLW1 13.56000042 W

F2 - Processing parameters  
 SI 65536  
 SF 400.2300103 MHz  
 WDW EM  
 SSB 0  
 LB 0.30 Hz  
 GB 0  
 PC 1.00

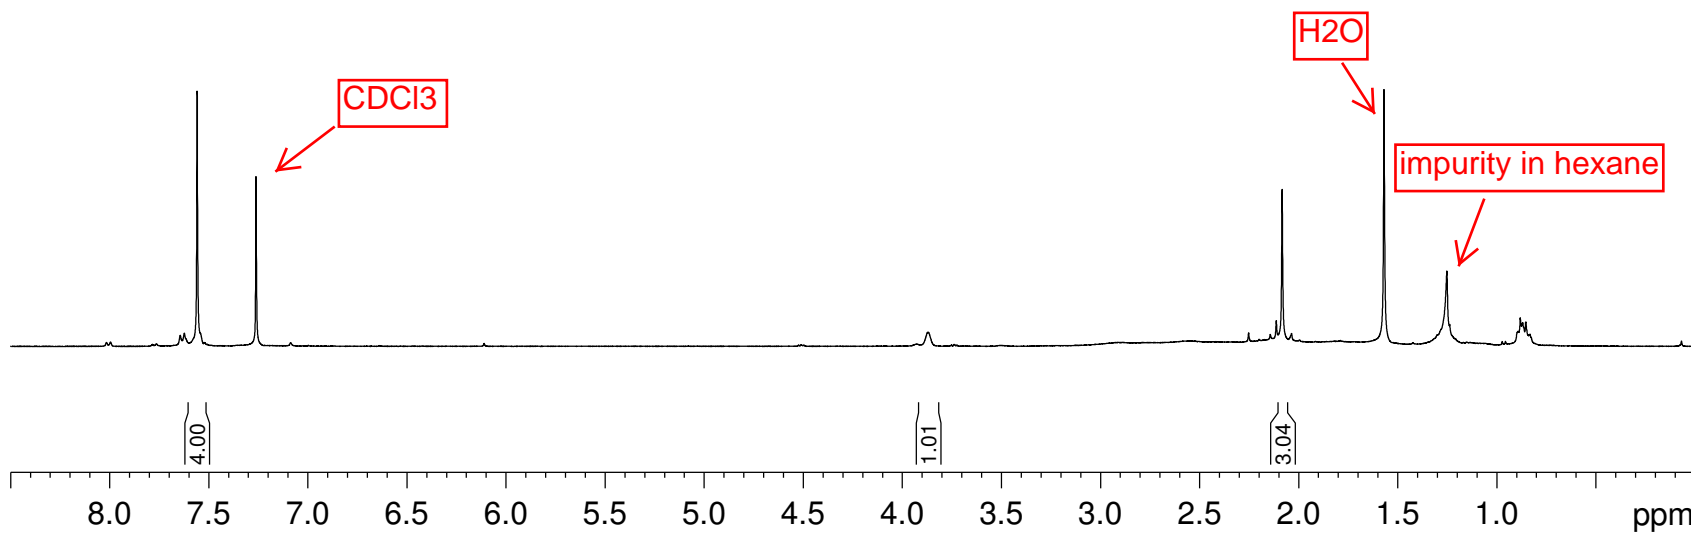

qyj-C-6-9-CDC13

132.41  
131.73  
130.53  
130.20  
129.84  
129.11  
126.85  
125.36  
125.32  
125.28

77.48  
77.16  
76.84  
70.50  
62.83

31.09  
29.85  
26.06

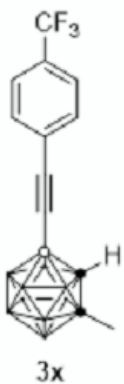

CDCI3

Current Data Parameters  
NAME qyj-C-6-9-CDC13  
EXPNO 1  
PROCNO 1

F2 - Acquisition Parameters  
Date\_ 20160422  
Time 22.22 h  
INSTRUM spect  
PROBHD Z108618\_0257 (  
PULPROG zgpg30  
TD 65536  
SOLVENT CDC13  
NS 15472  
DS 4  
SWH 29761.904 Hz  
FIDRES 0.454131 Hz  
AQ 1.1010048 sec  
RG 128  
DW 16.800 usec  
DE 6.50 usec  
TE 295.4 K  
D1 2.0000000 sec  
D11 0.0300000 sec  
TD0 1  
SFO1 100.6479773 MHz  
NUC1 13C  
P1 9.50 usec  
PLW1 55.3400015 W  
SFO2 400.2316009 MHz  
NUC2 1H  
CPDPRG[2] waltz16  
PCPD2 90.00 usec  
PLW2 13.5600042 W  
PLW12 0.27428001 W  
PLW13 0.13796000 W

F2 - Processing parameters  
SI 32768  
SF 100.6379006 MHz  
WDW EM  
SSB 0  
LB 1.00 Hz  
GB 0  
PC 1.40

impurity in hexane

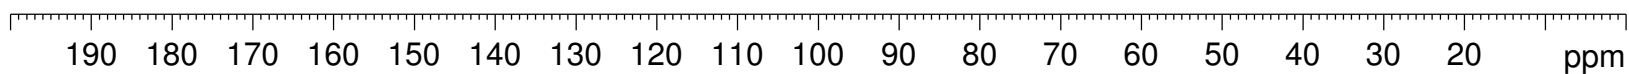

qyj-B-6-9-CDC13

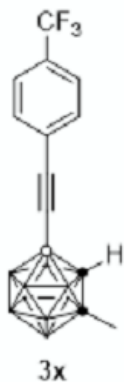

— -2.33  
— -6.30  
— -8.91  
— -9.87  
— -11.16  
— -11.89

Current Data Parameters  
NAME qyj-B-6-9-CDC13  
EXPNO 1  
PROCNO 1

F2 - Acquisition Parameters  
Date\_ 20160420  
Time 16.38 h  
INSTRUM spect  
PROBHD Z108618\_0257 (  
PULPROG zgdc  
TD 65536  
SOLVENT CDC13  
NS 48  
DS 4  
SWH 24038.461 Hz  
FIDRES 0.366798 Hz  
AQ 1.3631488 sec  
RG 512  
DW 20.800 usec  
DE 6.50 usec  
TE 294.8 K  
D1 2.00000000 sec  
D11 0.03000000 sec  
TD0 1  
SFO1 128.4096890 MHz  
NUC1 11B  
P1 7.50 usec  
PLW1 55.09999847 W  
SFO2 400.2316009 MHz  
NUC2 1H  
CPDPRG[2] waltz16  
PCPD2 90.00 usec  
PLW2 13.56000042 W  
PLW12 0.27428001 W

F2 - Processing parameters  
SI 32768  
SF 128.4097615 MHz  
WDW EM  
SSB 0  
LB 1.00 Hz  
GB 0  
PC 1.40

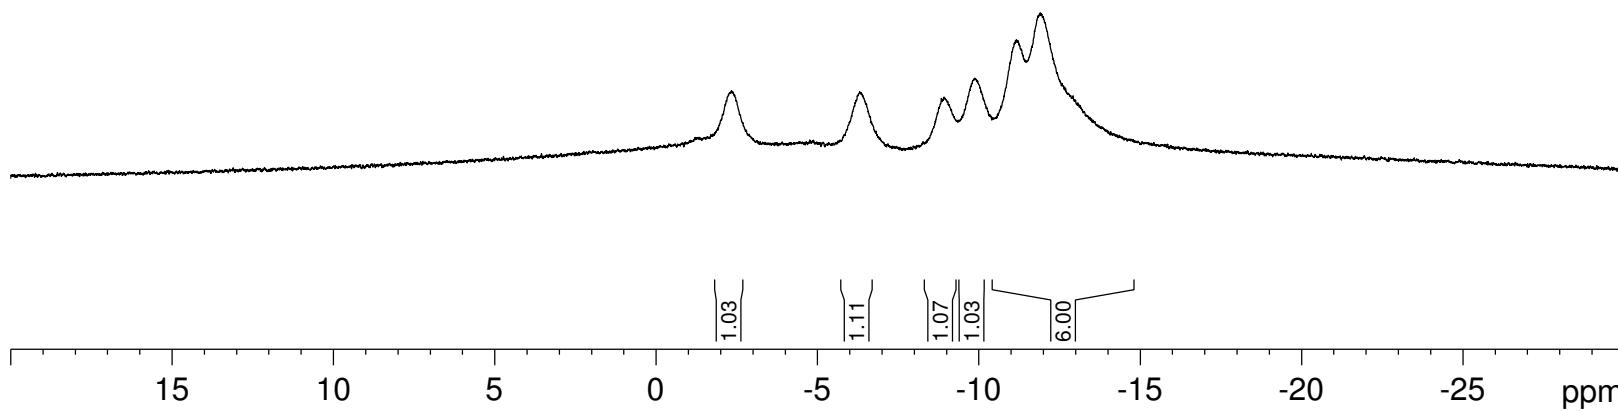

1.03 1.11 1.07 1.03 6.00

| 1.52  
 | 2.71  
 | 5.55  
 | 6.73  
 | 8.08  
 | 9.21  
 | 10.29  
 | 11.01  
 | 11.82

qyj-B-6-9-CDC13 (c)

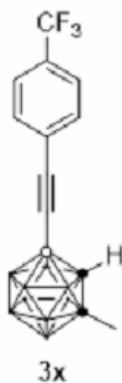

Current Data Parameters  
 NAME qyj-B-6-9-CDC13 (c)  
 EXPNO 1  
 PROCNO 1

F2 - Acquisition Parameters  
 Date\_ 20160420  
 Time 16.42 h  
 INSTRUM spect  
 PROBHD Z108618\_0257 (  
 PULPROG zg  
 TD 65536  
 SOLVENT CDC13  
 NS 40  
 DS 2  
 SWH 24038.461 Hz  
 FIDRES 0.366798 Hz  
 AQ 1.3631488 sec  
 RG 287  
 DW 20.800 usec  
 DE 6.50 usec  
 TE 294.5 K  
 D1 2.00000000 sec  
 TD0 1  
 SFO1 128.4096890 MHz  
 NUC1 11B  
 P1 7.50 usec  
 PLW1 55.09999847 W

F2 - Processing parameters  
 SI 32768  
 SF 128.4097430 MHz  
 WDW EM  
 SSB 0  
 LB 1.00 Hz  
 GB 0  
 PC 1.40

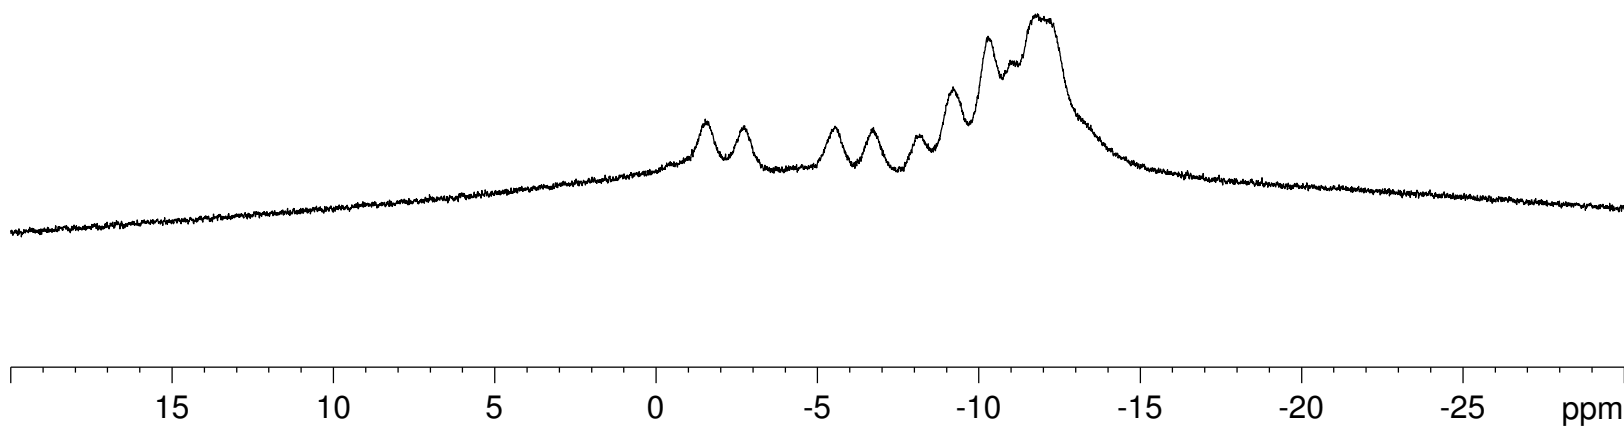

7.260

3.807

2.200  
2.055

1.566  
1.252

qyj-H-CCH-CDC13

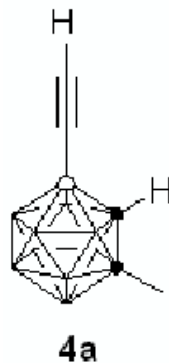

Current Data Parameters  
 NAME qyj-H-CCH-CDC13  
 EXPNO 1  
 PROCNO 1

F2 - Acquisition Parameters  
 Date\_ 20150614  
 Time 16.44 h  
 INSTRUM spect  
 PROBHD Z108618\_0257 (  
 PULPROG zg30  
 TD 65536  
 SOLVENT CDC13  
 NS 8  
 DS 2  
 SWH 8012.820 Hz  
 FIDRES 0.122266 Hz  
 AQ 4.0894465 sec  
 RG 114  
 DW 62.400 usec  
 DE 6.50 usec  
 TE 296.9 K  
 D1 1.00000000 sec  
 TD0 1  
 SFO1 400.2324714 MHz  
 NUC1 1H  
 P1 12.80 usec  
 PLW1 13.56000042 W

F2 - Processing parameters  
 SI 65536  
 SF 400.2300094 MHz  
 WDW EM  
 SSB 0  
 LB 0.30 Hz  
 GB 0  
 PC 1.00

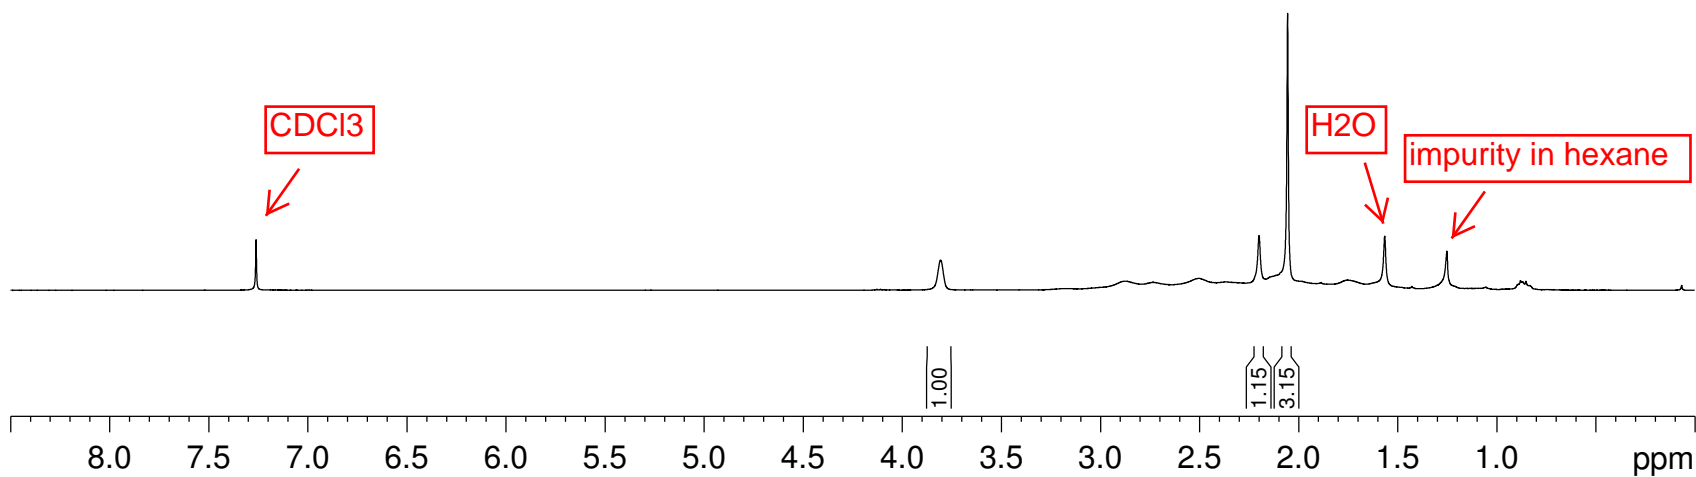

qyj-C-6-4a-C6D6

Current Data Parameters  
NAME qyj-C-6-4a-C6D6  
EXPNO 1  
PROCNO 1

F2 - Acquisition Parameters  
Date\_ 20160408  
Time 23.07 h  
INSTRUM spect  
PROBHD Z108618\_0257 (  
PULPROG zgpg30  
TD 65536  
SOLVENT C6D6  
NS 11533  
DS 4  
SWH 29761.904 Hz  
FIDRES 0.454131 Hz  
AQ 1.1010048 sec  
RG 128  
DW 16.800 usec  
DE 6.50 usec  
TE 294.6 K  
D1 2.0000000 sec  
D11 0.0300000 sec  
TD0 1  
SFO1 100.6479773 MHz  
NUC1 13C  
P1 9.50 usec  
PLW1 55.34000015 W  
SFO2 400.2316009 MHz  
NUC2 1H  
CPDPRG[2] waltz16  
PCPD2 90.00 usec  
PLW2 13.56000042 W  
PLW12 0.27428001 W  
PLW13 0.13796000 W

F2 - Processing parameters  
SI 32768  
SF 100.6378780 MHz  
WDW EM  
SSB 0  
LB 1.00 Hz  
GB 0  
PC 1.40

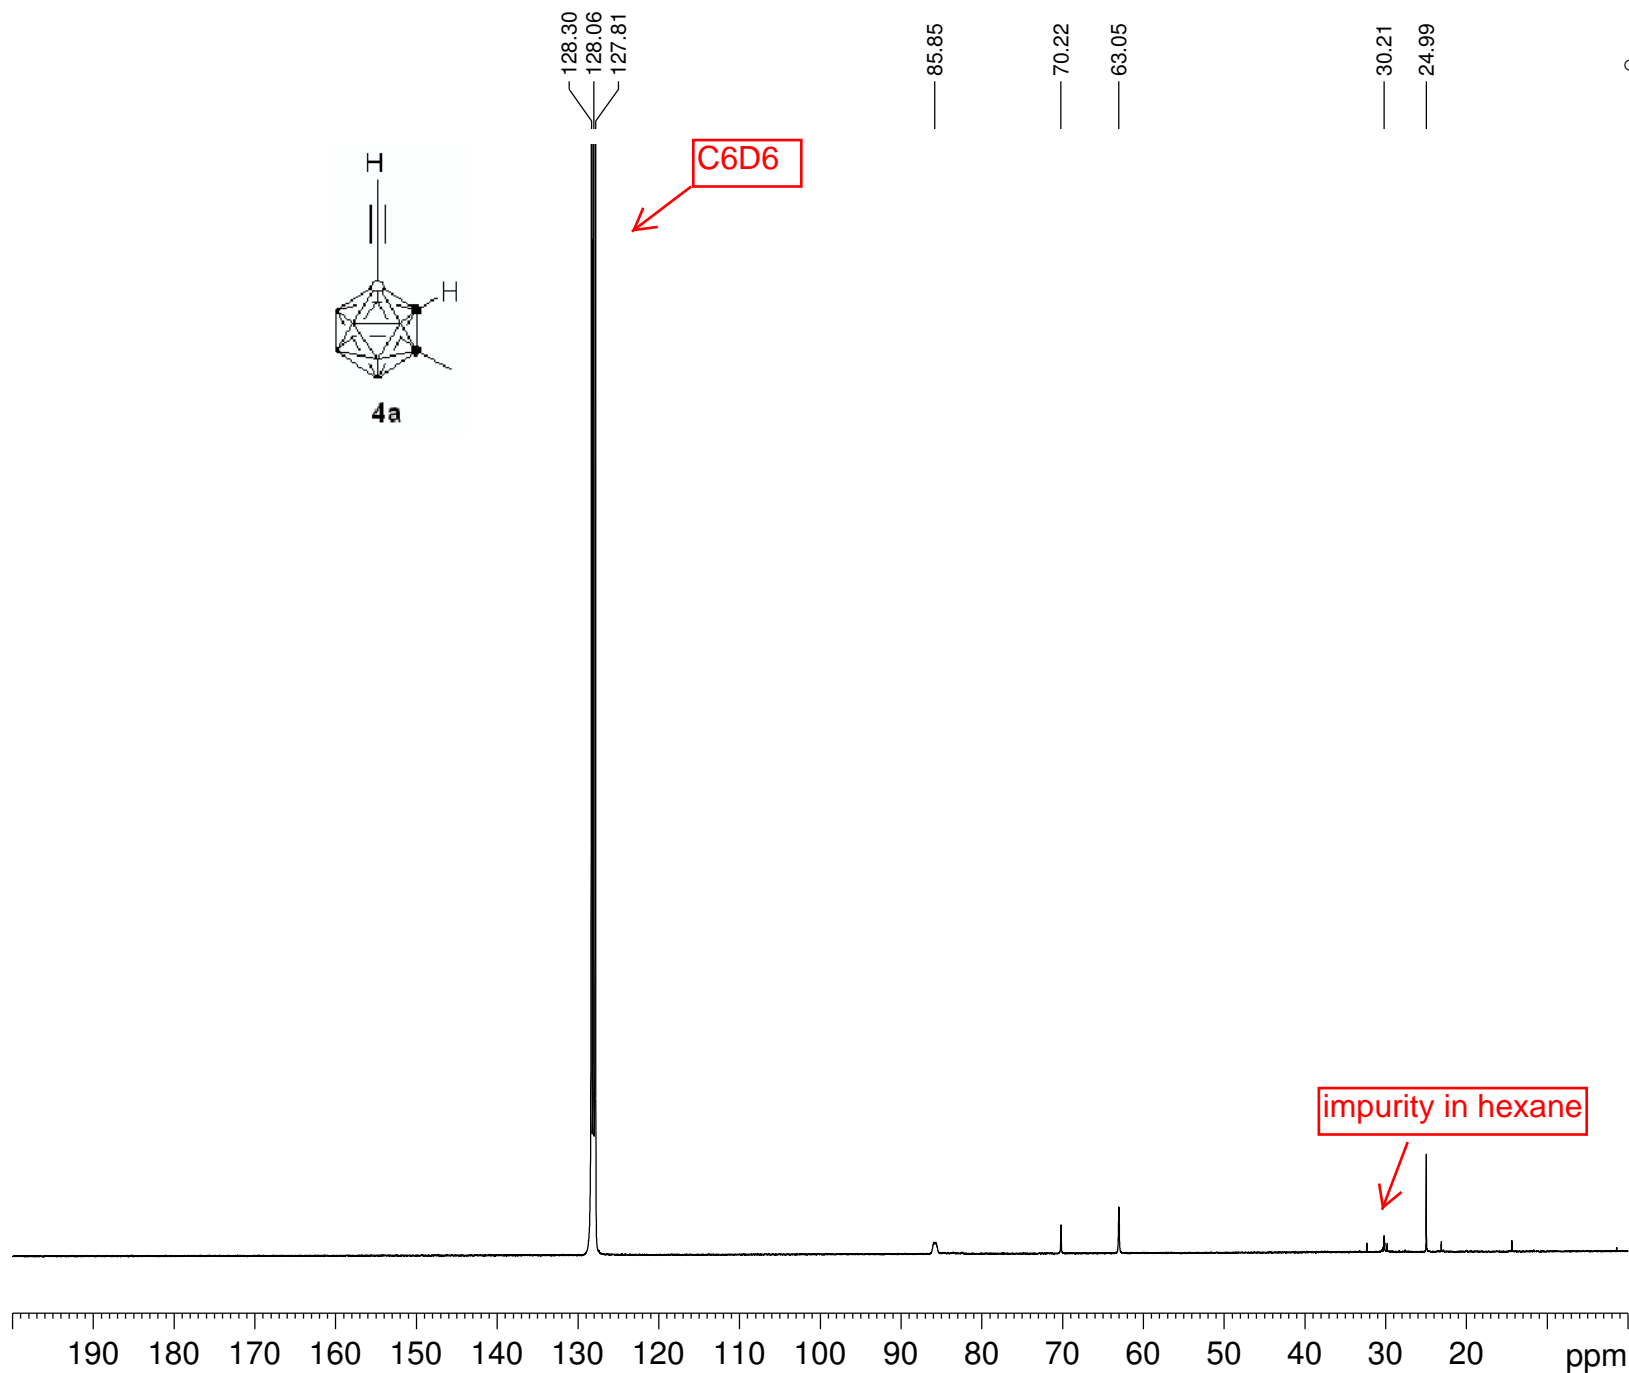

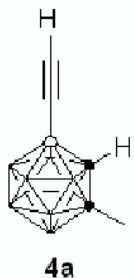

— -0.23  
 — -4.24  
 — -6.82  
 — -7.80  
 — -9.03  
 — -9.80  
 — -10.78

qyj-B-CBCCH-CDC13

Current Data Parameters  
 NAME qyj-B-CBCCH-CDC13  
 EXPNO 1  
 PROCNO 1

F2 - Acquisition Parameters  
 Date\_ 20150629  
 Time 18.44 h  
 INSTRUM spect  
 PROBHD Z108618\_0257 (  
 PULPROG zgpg30  
 TD 65536  
 SOLVENT CDC13  
 NS 12  
 DS 4  
 SWH 29761.904 Hz  
 FIDRES 0.454131 Hz  
 AQ 1.1010048 sec  
 RG 456  
 DW 16.800 usec  
 DE 6.50 usec  
 TE 295.5 K  
 D1 2.00000000 sec  
 D11 0.03000000 sec  
 TD0 1  
 SFO1 128.4096890 MHz  
 NUC1 11B  
 P1 7.50 usec  
 PLW1 55.09999847 W  
 SFO2 400.2316008 MHz  
 NUC2 1H  
 CPDPRG[2] waltz16  
 PCPD2 90.00 usec  
 PLW2 13.56000042 W  
 PLW12 0.27428001 W  
 PLW13 0.13796000 W

F2 - Processing parameters  
 SI 32768  
 SF 128.4095347 MHz  
 WDW EM  
 SSB 0  
 LB 1.00 Hz  
 GB 0  
 PC 1.40

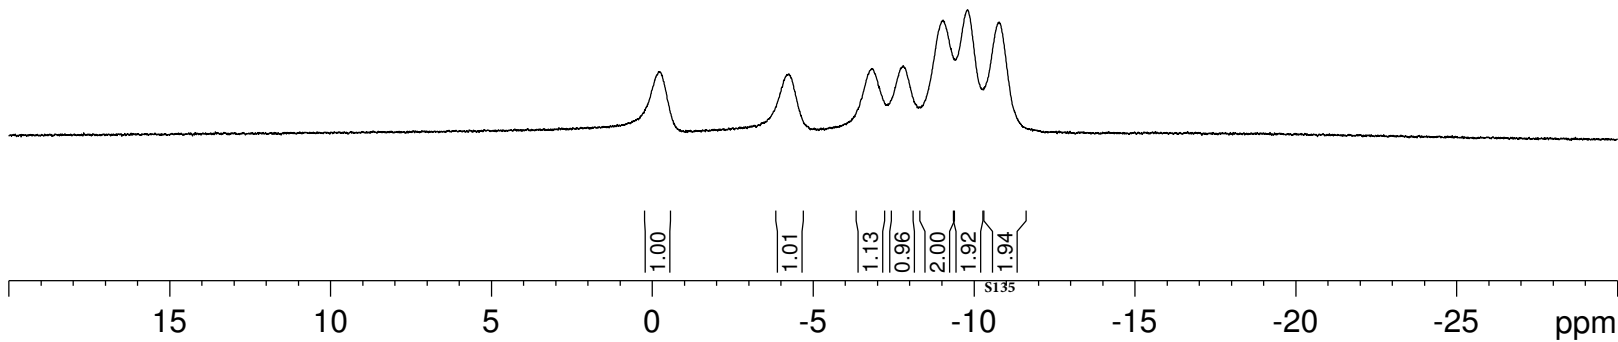

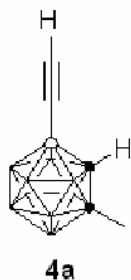

— -0.81  
 — -2.01  
 — -4.81  
 — -6.04  
 — -7.45  
 — -8.49  
 — -9.57  
 — -10.31  
 — -10.87  
 — -11.73  
 — -12.61

qyj-B-CBCCH-CDC13 (C)

Current Data Parameters  
 NAME qyj-B-CBCCH-CDC13 (C)  
 EXPNO 1  
 PROCNO 1

F2 - Acquisition Parameters  
 Date\_ 20150629  
 Time 18.46 h  
 INSTRUM spect  
 PROBHD Z108618\_0257 (  
 PULPROG zg  
 TD 65536  
 SOLVENT CDC13  
 NS 20  
 DS 4  
 SWH 25510.203 Hz  
 FIDRES 0.389255 Hz  
 AQ 1.2845056 sec  
 RG 256  
 DW 19.600 usec  
 DE 6.50 usec  
 TE 295.4 K  
 D1 1.00000000 sec  
 TD0 1  
 SFO1 128.4096891 MHz  
 NUC1 11B  
 P1 7.50 usec  
 PLW1 55.09999847 W

F2 - Processing parameters  
 SI 32768  
 SF 128.4096891 MHz  
 WDW EM  
 SSB 0  
 LB 1.00 Hz  
 GB 0  
 PC 1.40

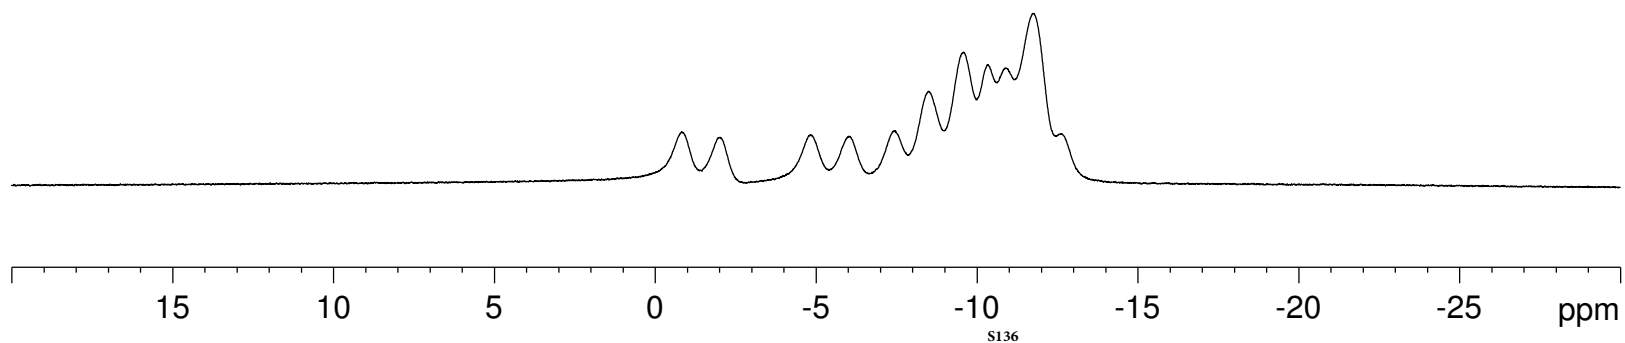



7.283  
7.271  
7.260  
6.988  
6.977  
6.966

3.873

2.091

1.637

qyj-H-6-1-CDC13

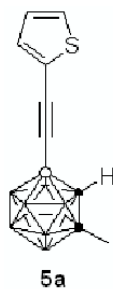

Current Data Parameters  
NAME qyj-H-6-1-CDC13  
EXPNO 1  
PROCNO 1

F2 - Acquisition Parameters  
Date\_ 20150614  
Time 11.37 h  
INSTRUM spect  
PROBHD Z824601\_0021 (  
PULPROG zg30  
TD 65536  
SOLVENT CDC13  
NS 16  
DS 2  
SWH 8012.820 Hz  
FIDRES 0.122266 Hz  
AQ 4.0894465 sec  
RG 203  
DW 62.400 usec  
DE 6.50 usec  
TE 294.7 K  
D1 1.00000000 sec  
TD0 1  
SFO1 400.1324708 MHz  
NUC1 1H  
P1 15.00 usec  
PLW1 8.31000042 W

F2 - Processing parameters  
SI 65536  
SF 400.1300006 MHz  
WDW EM  
SSB 0  
LB 0.30 Hz  
GB 0  
PC 1.00

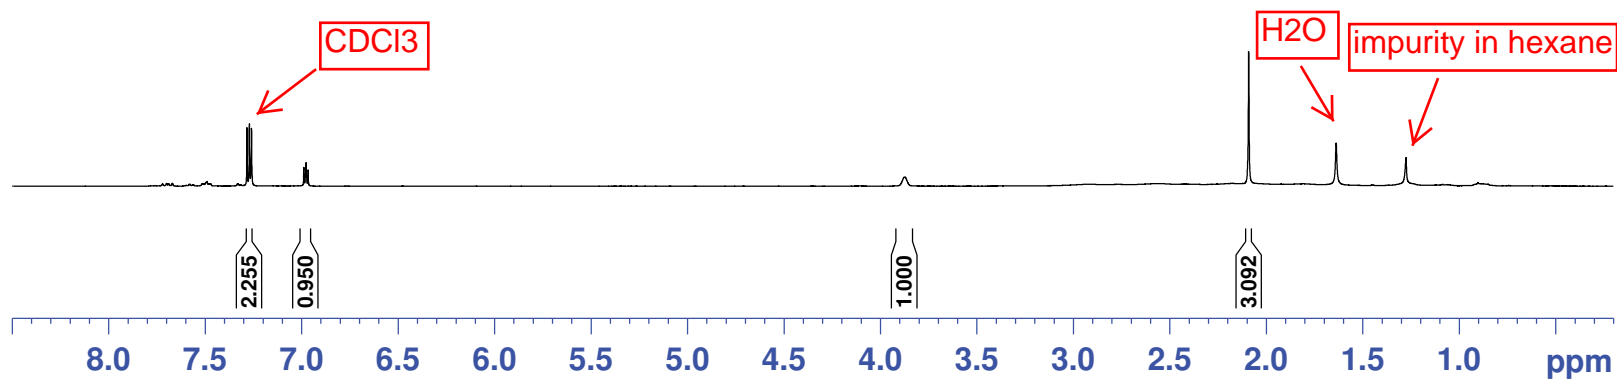

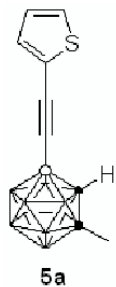

— 133.051  
 — 127.583  
 — 127.030  
 — 123.122

— 77.476  
 — 77.157  
 — 76.841  
 — 70.385  
 — 62.794

— 29.844  
 — 26.049

qyj-C-6-1-CDC13

Current Data Parameters  
 NAME qyj-C-6-1-CDC13  
 EXPNO 1  
 PROCNO 1

F2 - Acquisition Parameters  
 Date\_ 20150614  
 Time 13.50 h  
 INSTRUM spect  
 PROBHD Z824601\_0021 (  
 PULPROG zgpg30  
 TD 65536  
 SOLVENT CDC13  
 NS 1074  
 DS 4  
 SWH 24038.461 Hz  
 FIDRES 0.366798 Hz  
 AQ 1.3631488 sec  
 RG 203  
 DW 20.800 usec  
 DE 6.50 usec  
 TE 295.1 K  
 D1 2.00000000 sec  
 D11 0.03000000 sec  
 TD0 1  
 SFO1 100.6228298 MHz  
 NUC1 13C  
 P1 9.50 usec  
 PLW1 41.25000000 W  
 SFO2 400.1316005 MHz  
 NUC2 1H  
 CPDPRG[2] waltz16  
 PCPD2 90.00 usec  
 PLW2 8.31000042 W  
 PLW12 0.23083000 W  
 PLW13 0.11611000 W

F2 - Processing parameters  
 SI 32768  
 SF 100.6127557 MHz  
 WDW EM  
 SSB 0  
 LB 1.00 Hz  
 GB 0  
 PC 1.40

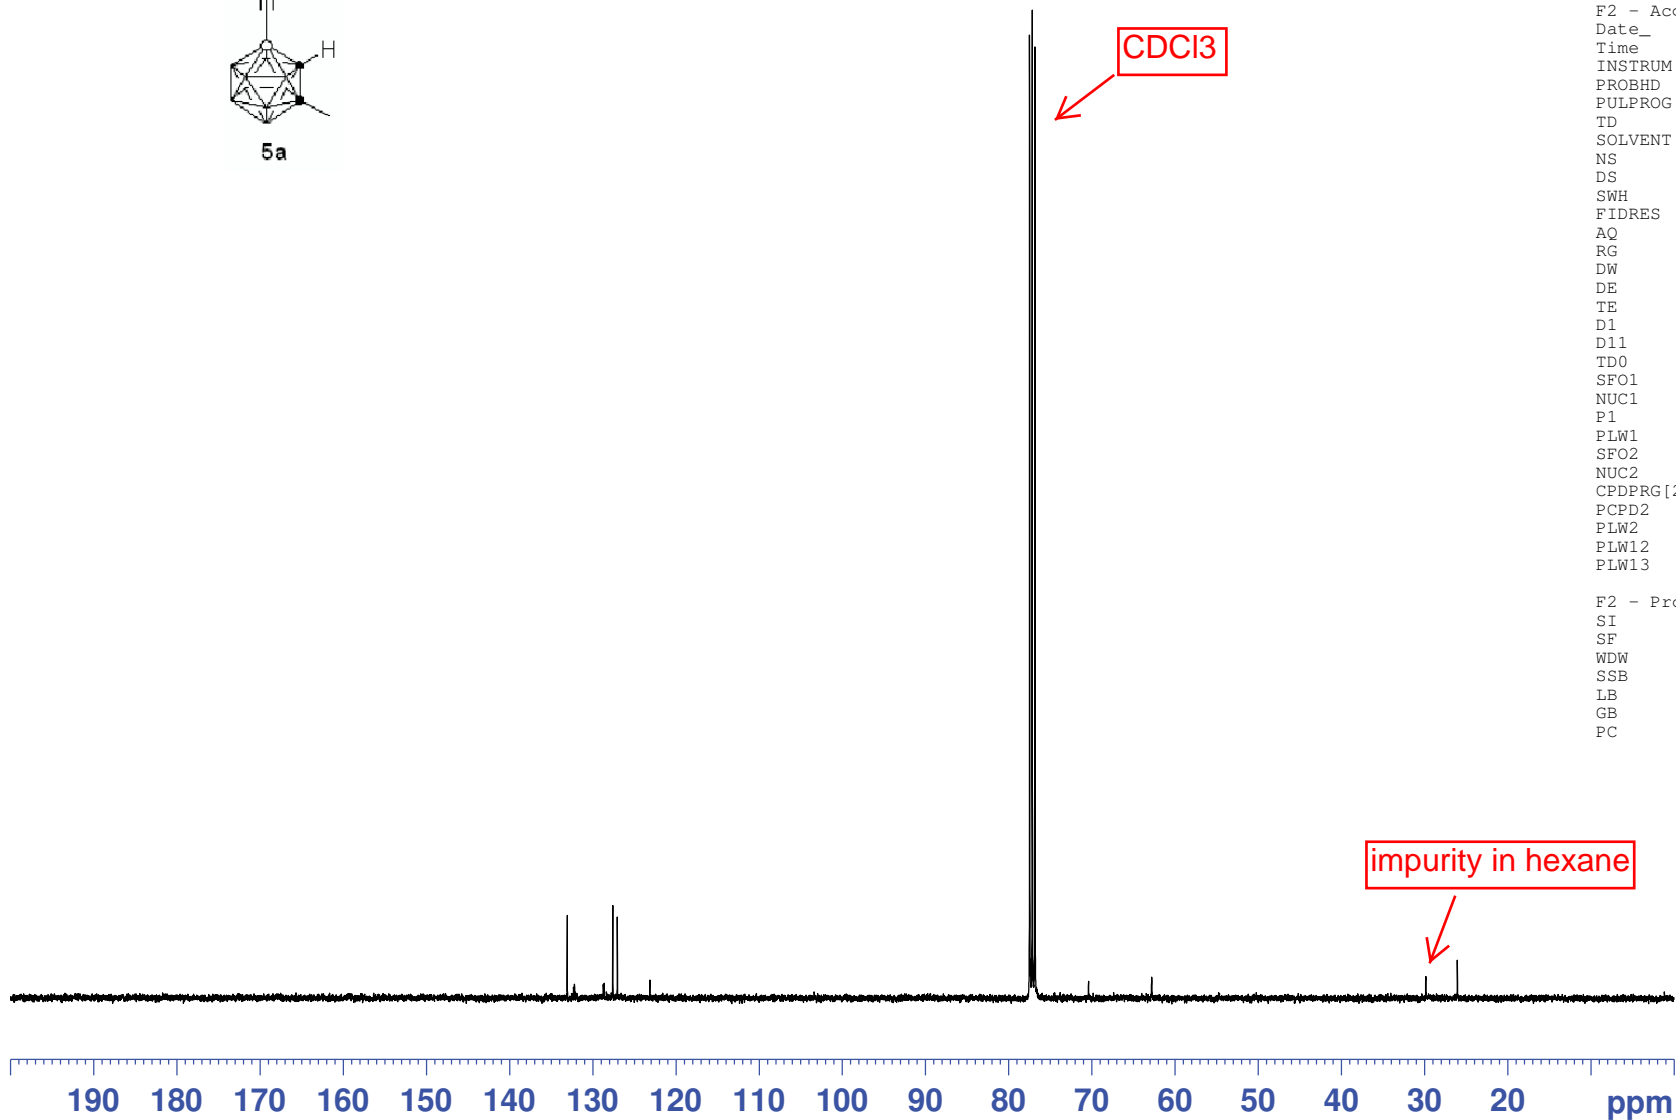

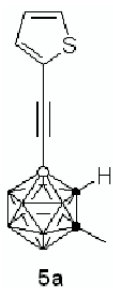

— -0.74  
 — -4.59  
 — -7.20  
 — -8.23  
 — -10.07  
 — -11.39

qyj-B-6-1-CDCl3

Current Data Parameters  
 NAME qyj-B-6-1-CDCl3  
 EXPNO 1  
 PROCNO 1

F2 - Acquisition Parameters  
 Date\_ 20150622  
 Time 10.19 h  
 INSTRUM spect  
 PROBHD Z108618\_0257 (  
 PULPROG zgpg30  
 TD 65536  
 SOLVENT C6D6  
 NS 40  
 DS 4  
 SWH 29761.904 Hz  
 FIDRES 0.454131 Hz  
 AQ 1.1010048 sec  
 RG 512  
 DW 16.800 usec  
 DE 6.50 usec  
 TE 296.9 K  
 D1 2.00000000 sec  
 D11 0.03000000 sec  
 TD0 1  
 SFO1 128.4096890 MHz  
 NUC1 11B  
 P1 7.50 usec  
 PLW1 55.09999847 W  
 SFO2 400.2316008 MHz  
 NUC2 1H  
 CPDPRG[2] waltz16  
 PCPD2 90.00 usec  
 PLW2 13.56000042 W  
 PLW12 0.27428001 W  
 PLW13 0.13796000 W

F2 - Processing parameters  
 SI 32768  
 SF 128.4095347 MHz  
 WDW EM  
 SSB 0  
 LB 1.00 Hz  
 GB 0  
 PC 1.40

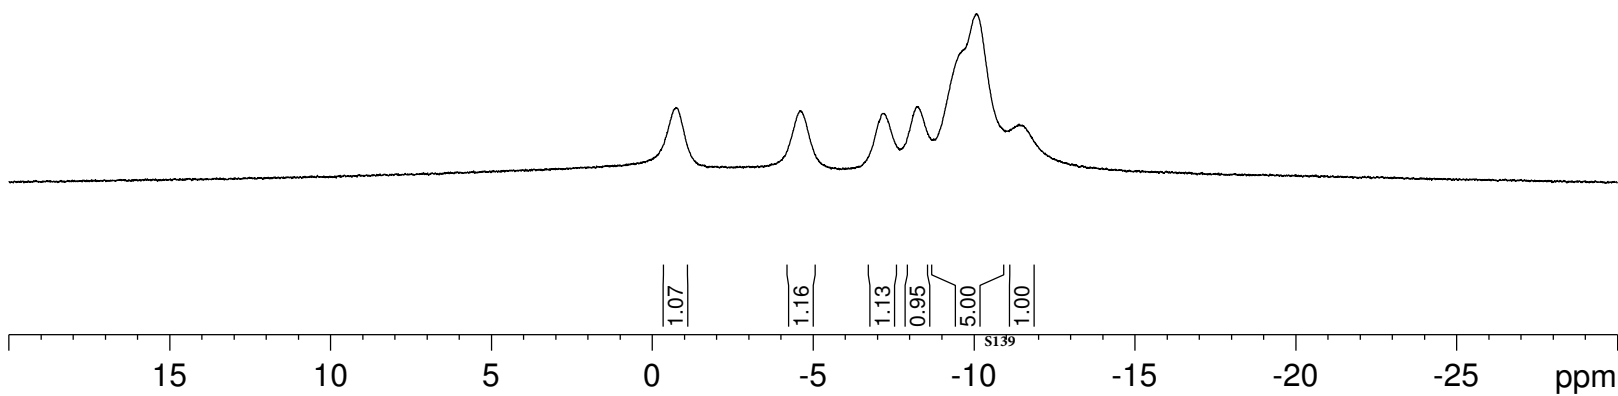

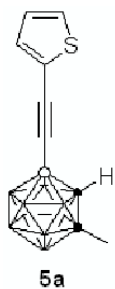

— -1.33  
 — -2.48  
 — -5.21  
 — -6.40  
 — -7.74  
 — -8.89  
 — -10.06  
 — -11.21  
 — -11.90  
 — -13.17

qyj-B-6-1-CDC13 (C)

Current Data Parameters  
 NAME qyj-B-6-1-CDC13 (C)  
 EXPNO 1  
 PROCNO 1

F2 - Acquisition Parameters  
 Date\_ 20150622  
 Time 10.23 h  
 INSTRUM spect  
 PROBHD Z108618\_0257 (  
 PULPROG zg  
 TD 65536  
 SOLVENT C6D6  
 NS 48  
 DS 4  
 SWH 25510.203 Hz  
 FIDRES 0.389255 Hz  
 AQ 1.2845056 sec  
 RG 322  
 DW 19.600 usec  
 DE 6.50 usec  
 TE 296.5 K  
 D1 1.00000000 sec  
 TD0 1  
 SFO1 128.4096891 MHz  
 NUC1 11B  
 P1 7.50 usec  
 PLW1 55.09999847 W

F2 - Processing parameters  
 SI 32768  
 SF 128.4096891 MHz  
 WDW EM  
 SSB 0  
 LB 1.00 Hz  
 GB 0  
 PC 1.40

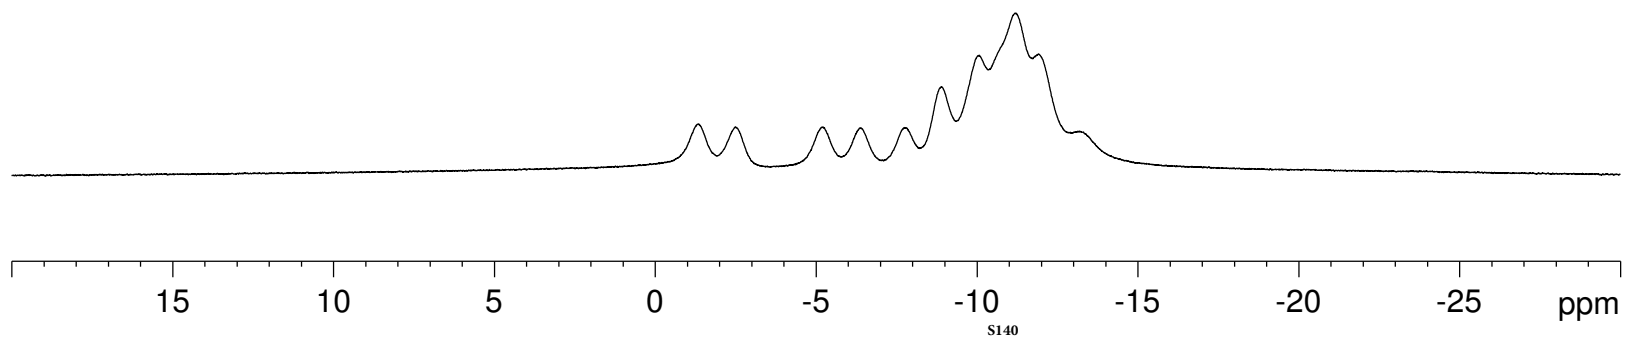

7.260

3.774

2.044

1.595

1.251

qyj-H-6-3-CDC13

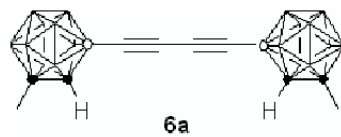

Current Data Parameters  
NAME qyj-H-6-3-CDC13  
EXPNO 1  
PROCNO 1

F2 - Acquisition Parameters  
Date\_ 20150614  
Time 15.38 h  
INSTRUM spect  
PROBHD Z824601\_0021 (  
PULPROG zg30  
TD 65536  
SOLVENT CDC13  
NS 8  
DS 2  
SWH 8012.820 Hz  
FIDRES 0.122266 Hz  
AQ 4.0894465 sec  
RG 203  
DW 62.400 usec  
DE 6.50 usec  
TE 295.0 K  
D1 1.00000000 sec  
TD0 1  
SFO1 400.1324708 MHz  
NUC1 1H  
P1 15.00 usec  
PLW1 8.31000042 W

F2 - Processing parameters  
SI 65536  
SF 400.1300099 MHz  
WDW EM  
SSB 0  
LB 0.30 Hz  
GB 0  
PC 1.00

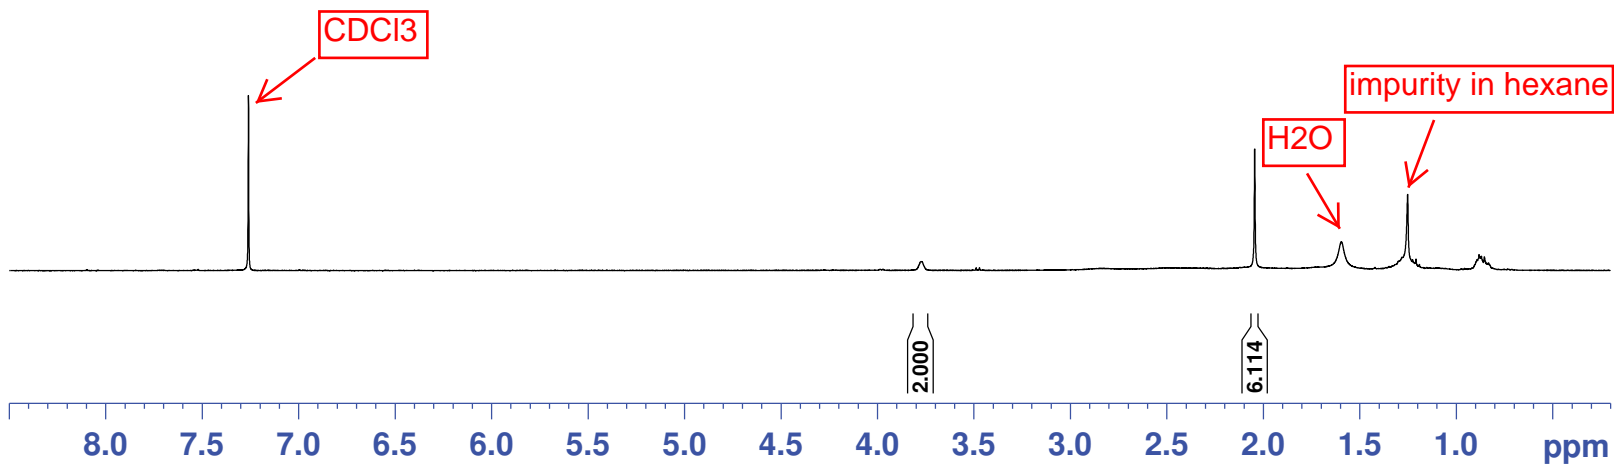

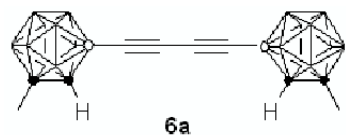

77.476  
77.158  
76.841  
70.585  
62.832  
29.852  
26.029

CDC13

qyj-C-6-3-CDC13

Current Data Parameters  
NAME qyj-C-6-3-CDC13  
EXPNO 1  
PROCNO 1

F2 - Acquisition Parameters  
Date\_ 20150614  
Time 15.41 h  
INSTRUM spect  
PROBHD Z824601\_0021 (  
PULPROG zgpg30  
TD 65536  
SOLVENT CDC13  
NS 4421  
DS 4  
SWH 24038.461 Hz  
FIDRES 0.366798 Hz  
AQ 1.3631488 sec  
RG 203  
DW 20.800 usec  
DE 6.50 usec  
TE 295.1 K  
D1 2.00000000 sec  
D11 0.03000000 sec  
TD0 1  
SFO1 100.6228298 MHz  
NUC1 13C  
P1 9.50 usec  
PLW1 41.25000000 W  
SFO2 400.1316005 MHz  
NUC2 1H  
CPDPRG[2] waltz16  
PCPD2 90.00 usec  
PLW2 8.31000042 W  
PLW12 0.23083000 W  
PLW13 0.11611000 W

F2 - Processing parameters  
SI 32768  
SF 100.6127549 MHz  
WDW EM  
SSB 0  
LB 1.00 Hz  
GB 0  
PC 1.40

impurity in hexane

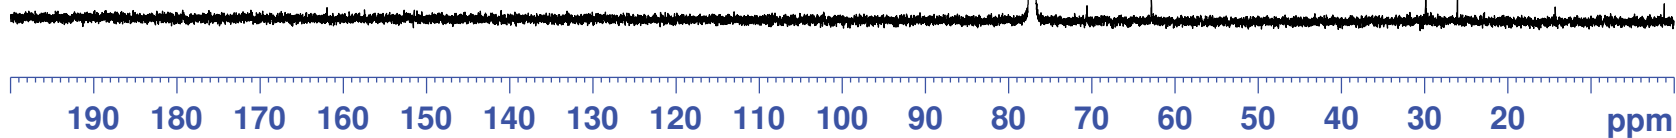

qyj-B-6-3-CDCl3

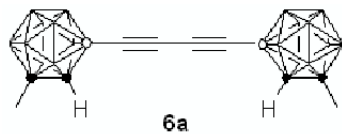

— -0.39  
— -4.41  
— -7.10  
— -7.93  
— -9.25  
— -9.98  
— -11.07

Current Data Parameters  
NAME qyj-B-6-3-CDCl3  
EXPNO 1  
PROCNO 1

F2 - Acquisition Parameters  
Date\_ 20150622  
Time 10.31 h  
INSTRUM spect  
PROBHD Z108618\_0257 (  
PULPROG zgpg30  
TD 65536  
SOLVENT C6D6  
NS 80  
DS 4  
SWH 29761.904 Hz  
FIDRES 0.454131 Hz  
AQ 1.1010048 sec  
RG 512  
DW 16.800 usec  
DE 6.50 usec  
TE 296.7 K  
D1 2.00000000 sec  
D11 0.03000000 sec  
TD0 1  
SFO1 128.4096890 MHz  
NUC1 11B  
P1 7.50 usec  
PLW1 55.09999847 W  
SFO2 400.2316008 MHz  
NUC2 1H  
CPDPRG[2] waltz16  
PCPD2 90.00 usec  
PLW2 13.56000042 W  
PLW12 0.27428001 W  
PLW13 0.13796000 W

F2 - Processing parameters  
SI 32768  
SF 128.4095347 MHz  
WDW EM  
SSB 0  
LB 1.00 Hz  
GB 0  
PC 1.40

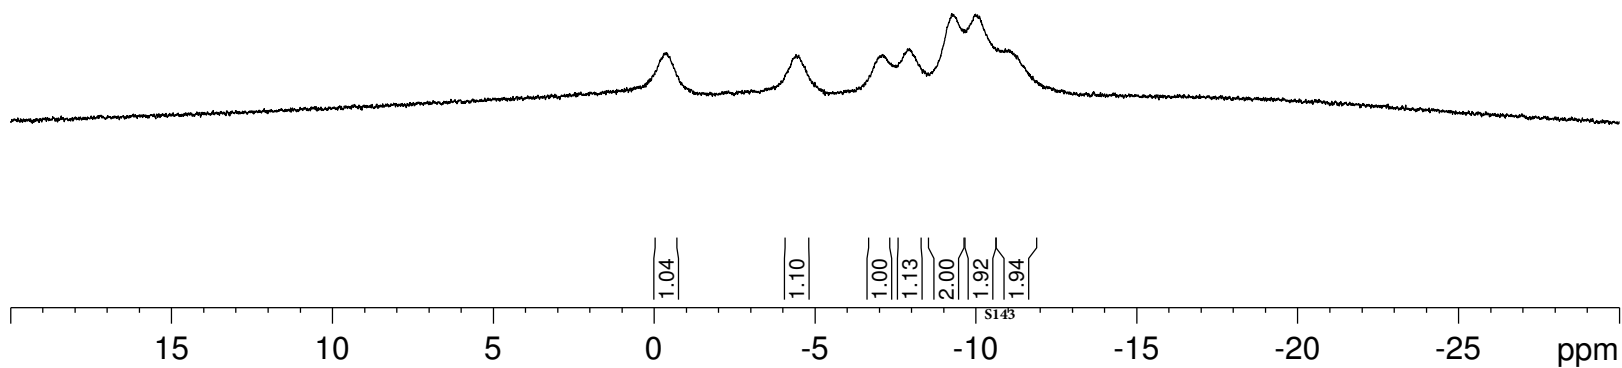

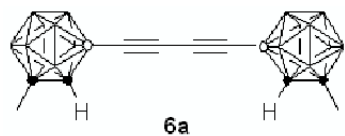

— -0.90  
 — -2.09  
 — -5.03  
 — -6.12  
 — -7.47  
 — -8.66  
 — -9.73  
 — -10.43  
 — -11.00  
 — -11.92

qyj-B-6-3-CDC13 (C)

Current Data Parameters  
 NAME qyj-B-6-3-CDC13 (C)  
 EXPNO 1  
 PROCNO 1

F2 - Acquisition Parameters  
 Date\_ 20150622  
 Time 10.35 h  
 INSTRUM spect  
 PROBHD Z108618\_0257 (  
 PULPROG zg  
 TD 65536  
 SOLVENT C6D6  
 NS 40  
 DS 4  
 SWH 25510.203 Hz  
 FIDRES 0.389255 Hz  
 AQ 1.2845056 sec  
 RG 322  
 DW 19.600 usec  
 DE 6.50 usec  
 TE 296.2 K  
 D1 1.00000000 sec  
 TD0 1  
 SFO1 128.4096891 MHz  
 NUC1 11B  
 P1 7.50 usec  
 PLW1 55.09999847 W

F2 - Processing parameters  
 SI 32768  
 SF 128.4096891 MHz  
 WDW EM  
 SSB 0  
 LB 1.00 Hz  
 GB 0  
 PC 1.40

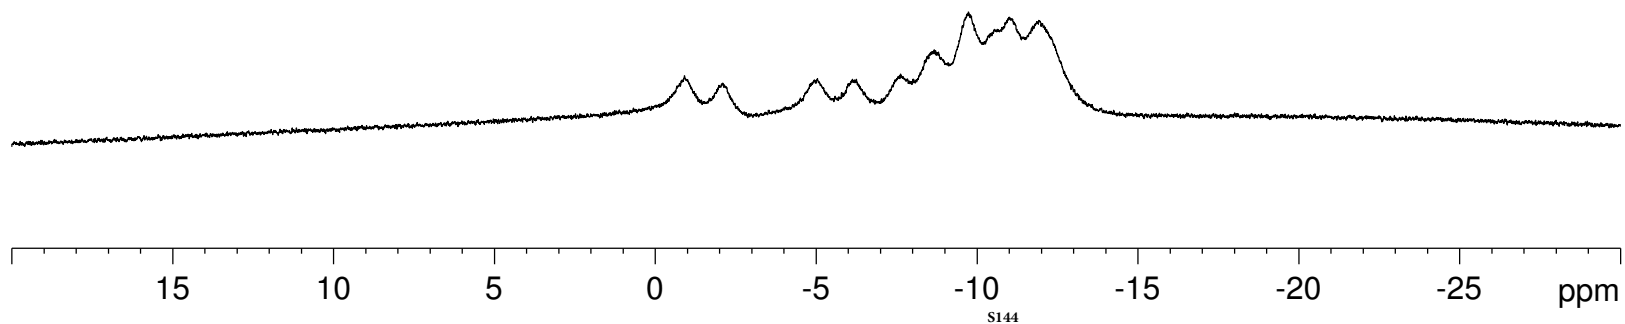



8.022  
7.740  
7.720  
7.556  
7.543  
7.524  
7.504  
7.491  
7.459  
7.440  
7.422  
7.260

4.438

2.123

qyj-H-6-4-CDC13

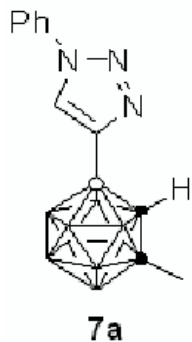

Current Data Parameters  
NAME qyj-H-6-4-CDC13  
EXPNO 1  
PROCNO 1

F2 - Acquisition Parameters  
Date\_ 20150615  
Time 12.08 h  
INSTRUM spect  
PROBHD Z108618\_0257 (  
PULPROG zg30  
TD 65536  
SOLVENT CDC13  
NS 10  
DS 2  
SWH 8012.820 Hz  
FIDRES 0.122266 Hz  
AQ 4.0894465 sec  
RG 114  
DW 62.400 usec  
DE 6.50 usec  
TE 295.6 K  
D1 1.00000000 sec  
TD0 1  
SFO1 400.2324714 MHz  
NUC1 1H  
P1 12.80 usec  
PLW1 13.56000042 W

F2 - Processing parameters  
SI 65536  
SF 400.2300097 MHz  
WDW EM  
SSB 0  
LB 0.30 Hz  
GB 0  
PC 1.00

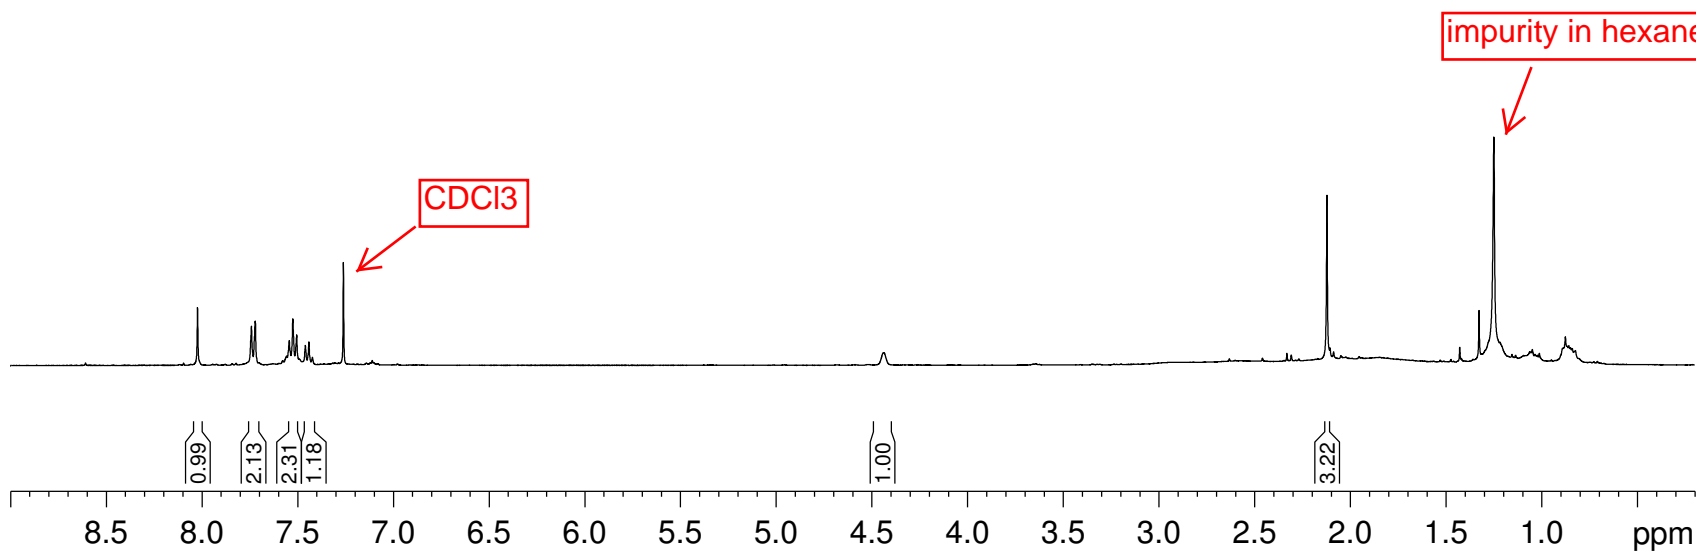

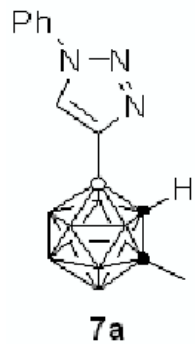

— 136.942  
 — 129.915  
 — 129.047  
 — 120.897

— 77.476  
 — 77.158  
 — 76.841  
 — 71.121  
 — 62.369

— 29.842  
 — 26.001

qyj-C-6-4-CDC13

Current Data Parameters  
 NAME qyj-C-6-4-CDC13  
 EXPNO 1  
 PROCNO 1

F2 - Acquisition Parameters  
 Date\_ 20150615  
 Time 14.58 h  
 INSTRUM spect  
 PROBHD Z824601\_0021 (  
 PULPROG zgpg30  
 TD 65536  
 SOLVENT CDC13  
 NS 888  
 DS 4  
 SWH 24038.461 Hz  
 FIDRES 0.366798 Hz  
 AQ 1.3631488 sec  
 RG 203  
 DW 20.800 usec  
 DE 6.50 usec  
 TE 295.2 K  
 D1 2.00000000 sec  
 D11 0.03000000 sec  
 TD0 1  
 SFO1 100.6228298 MHz  
 NUC1 13C  
 P1 9.50 usec  
 PLW1 41.25000000 W  
 SFO2 400.1316005 MHz  
 NUC2 1H  
 CPDPRG[2] waltz16  
 PCPD2 90.00 usec  
 PLW2 8.31000042 W  
 PLW12 0.23083000 W  
 PLW13 0.11611000 W

F2 - Processing parameters  
 SI 32768  
 SF 100.6127557 MHz  
 WDW EM  
 SSB 0  
 LB 1.00 Hz  
 GB 0  
 PC 1.40

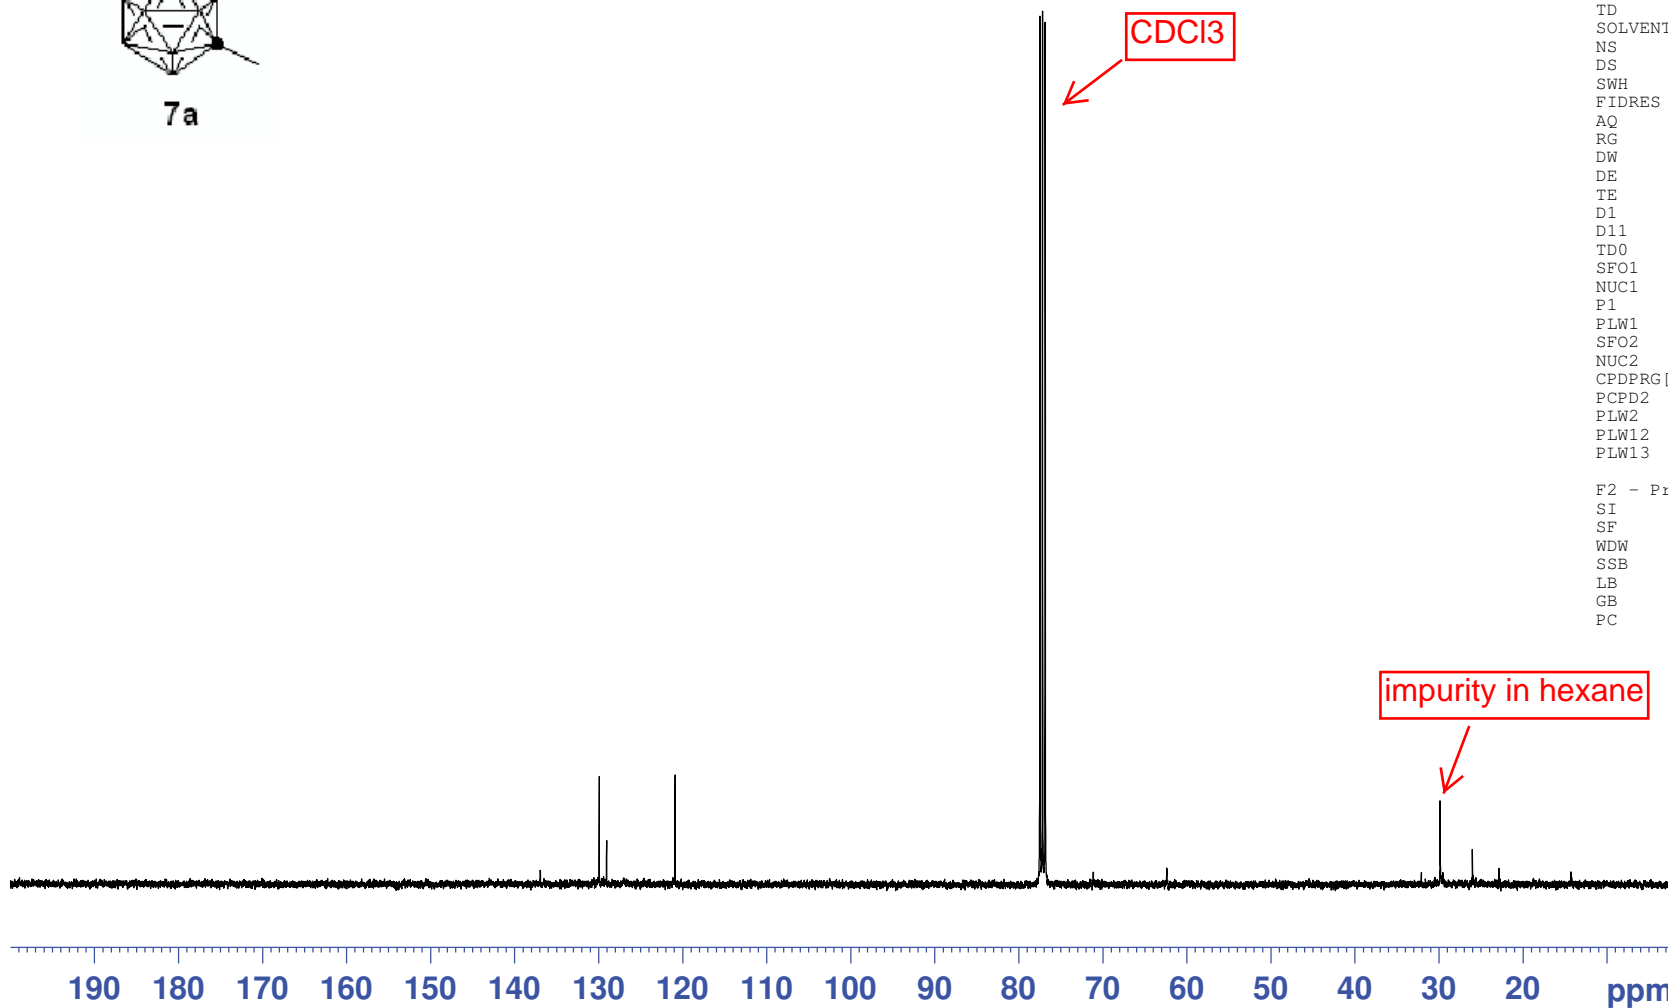

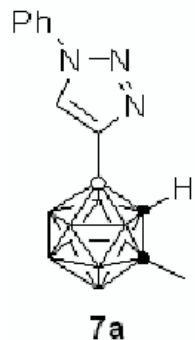

— -0.26  
 — -4.55  
 — -7.26  
 — -8.74  
 — -9.34

qyj-B-6-4-CDCl3

Current Data Parameters  
 NAME qyj-B-6-4-CDCl3  
 EXPNO 1  
 PROCNO 1

F2 - Acquisition Parameters

Date\_ 20150622  
 Time 10.37 h  
 INSTRUM spect  
 PROBHD Z108618\_0257 (  
 PULPROG zgpg30  
 TD 65536  
 SOLVENT C6D6  
 NS 64  
 DS 4  
 SWH 29761.904 Hz  
 FIDRES 0.454131 Hz  
 AQ 1.1010048 sec  
 RG 512  
 DW 16.800 usec  
 DE 6.50 usec  
 TE 296.4 K  
 D1 2.00000000 sec  
 D11 0.03000000 sec  
 TD0 1  
 SFO1 128.4096890 MHz  
 NUC1 11B  
 P1 7.50 usec  
 PLW1 55.09999847 W  
 SFO2 400.2316008 MHz  
 NUC2 1H  
 CPDPRG[2] waltz16  
 PCPD2 90.00 usec  
 PLW2 13.56000042 W  
 PLW12 0.27428001 W  
 PLW13 0.13796000 W

F2 - Processing parameters

SI 32768  
 SF 128.4095347 MHz  
 WDW EM  
 SSB 0  
 LB 1.00 Hz  
 GB 0  
 PC 1.40

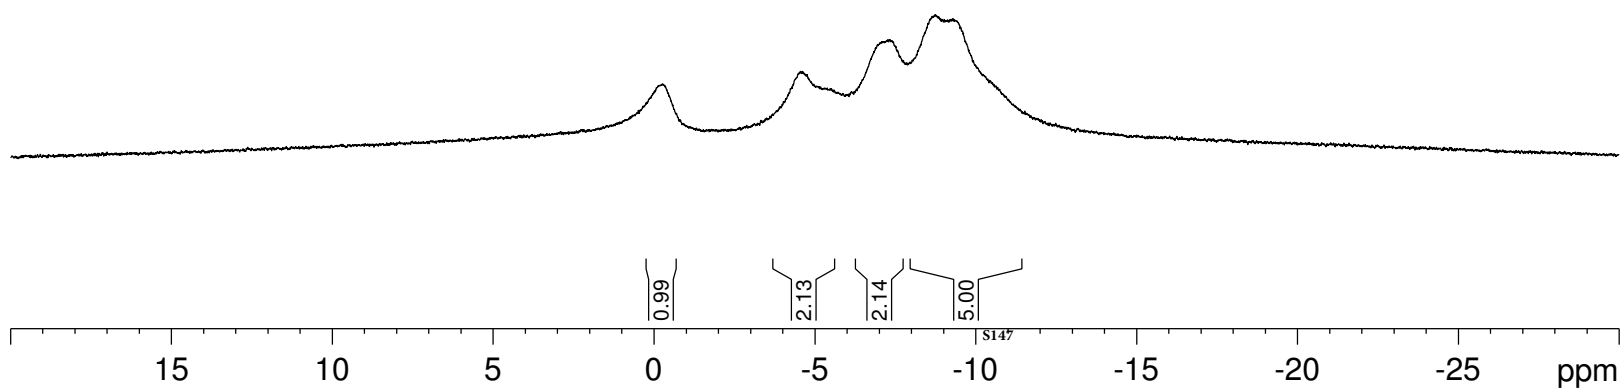

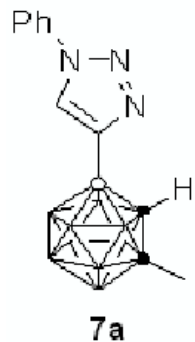

— -0.82  
 — -2.00  
 — -5.18  
 — -6.43  
 — -7.95  
 — -9.08  
 — -10.02  
 — -11.07

qyj-B-6-4-CDC13 (C)

Current Data Parameters  
 NAME qyj-B-6-4-CDC13 (C)  
 EXPNO 1  
 PROCNO 1

F2 - Acquisition Parameters  
 Date\_ 20150622  
 Time 10.42 h  
 INSTRUM spect  
 PROBHD Z108618\_0257 (  
 PULPROG zg  
 TD 65536  
 SOLVENT C6D6  
 NS 56  
 DS 4  
 SWH 25510.203 Hz  
 FIDRES 0.389255 Hz  
 AQ 1.2845056 sec  
 RG 322  
 DW 19.600 usec  
 DE 6.50 usec  
 TE 296.2 K  
 D1 1.00000000 sec  
 TD0 1  
 SFO1 128.4096891 MHz  
 NUC1 11B  
 P1 7.50 usec  
 PLW1 55.09999847 W

F2 - Processing parameters  
 SI 32768  
 SF 128.4096891 MHz  
 WDW EM  
 SSB 0  
 LB 1.00 Hz  
 GB 0  
 PC 1.40

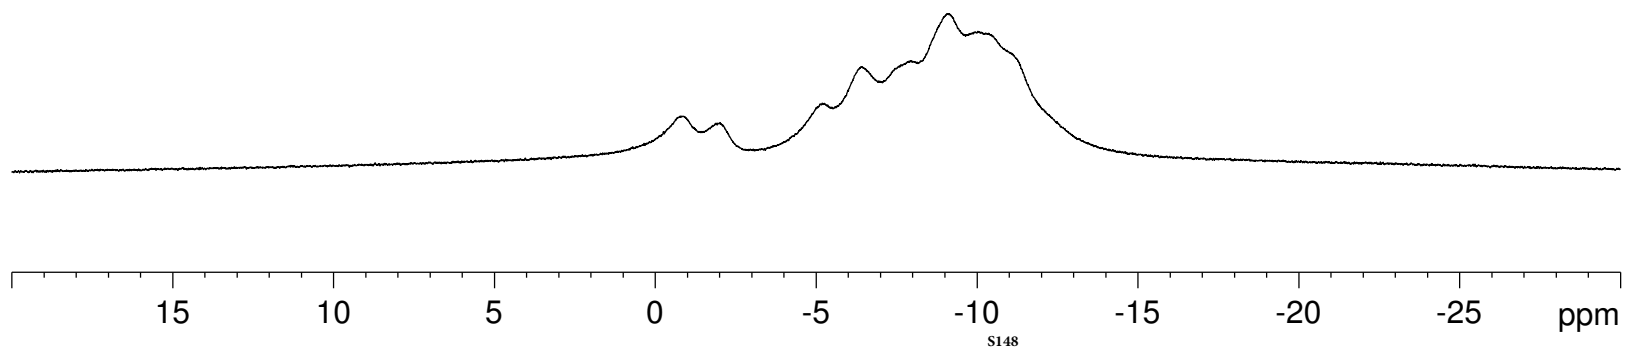

Supplement: SC-007-C6SC00901H-s001.pdf [file SC-007-C6SC00901H-s001.pdf]
